# Supplementary material
Source: MDPI journal article supplement (https://www.mdpi.com/2673-8112/3/4/43)
Supplement: s1 [file s1]

**Q1: Which of the following regions do you live in?**

☐ Northland Region

☐ Auckland Region

☐ Waikato Region

☐ Bay of Plenty Region

☐ Gisborne Region

☐ Hawke's Bay Region

☐ Taranaki Region

☐ Manawatu-Whanganui Region

☐ Wellington Region

☐ Tasman/ Nelson Region

☐ Marlborough Region

☐ West Coast Region

☐ Canterbury Region

☐ Otago Region

☐ Southland Region

## Q2: Beliefs about Covid-19

We are interested in your opinions about Covid-19. How strongly do you agree or disagree with the following statements?

| Item                                                                                                | Strongly agree           | Agree                    | Unsure/<br>neutral       | Disagree                 | Strongly disagree        |
|-----------------------------------------------------------------------------------------------------|--------------------------|--------------------------|--------------------------|--------------------------|--------------------------|
| You cannot catch Covid-19 from people with the virus who do not have symptoms                       | <input type="checkbox"/> |
| Covid-19 is only a danger to the elderly and people who already have health problem                 | <input type="checkbox"/> |
| Infected people spread Covid-19 by coughing and sneezing                                            | <input type="checkbox"/> |
| Children cannot catch Covid-19                                                                      | <input type="checkbox"/> |
| Once you have had Covid-19 you are immune to re-infection                                           | <input type="checkbox"/> |
| I think Covid-19 is a hoax                                                                          | <input type="checkbox"/> |
| Fears about Covid-19 are exaggerated                                                                | <input type="checkbox"/> |
| Children are perfectly safe from Covid-19                                                           | <input type="checkbox"/> |
| You can catch Covid-19 by touching anything handled by an infected person                           | <input type="checkbox"/> |
| Covid-19 is no worse than the seasonal flu                                                          | <input type="checkbox"/> |
| Covid-19 is a real threat to my health.                                                             | <input type="checkbox"/> |
| Getting vaccinated against Covid-19 means you will recover faster                                   | <input type="checkbox"/> |
| Getting vaccinated against Covid-19 means your symptoms will be much weaker if you do get the virus | <input type="checkbox"/> |
| Once you are vaccinated you cannot catch or spread Covid-19                                         | <input type="checkbox"/> |

### Q3: Beliefs about slowing the spread of Covid-19

We are interested in your opinions about slowing the spread of Covid-19. How strongly do you agree or disagree with the following statements?

| Item                                                                                                 | Strongly agree           | Agree                    | Unsure/<br>neutral       | Disagree                 | Strongly disagree        |
|------------------------------------------------------------------------------------------------------|--------------------------|--------------------------|--------------------------|--------------------------|--------------------------|
| We need to slow the spread of Covid-19 to save lives                                                 | <input type="checkbox"/> |
| We should slow the spread of Covid-19 to keep supply chains functioning                              | <input type="checkbox"/> |
| It would be better to let it spread and build herd immunity                                          | <input type="checkbox"/> |
| There is no point trying to slow the spread of Covid-19 because it is a virus and will keep changing | <input type="checkbox"/> |
| Covid-19 is everywhere in the world so there is no way we can avoid it                               | <input type="checkbox"/> |
| We need to slow the spread of Covid-19 to reduce the pressure on our health system                   | <input type="checkbox"/> |

### Q4: Taking responsibility and action

We are interested in how strongly you feel about the need for action to be taken to slow the spread of Covid-19. How strongly do you agree or disagree with the following statements?

| Item                                                                       | Strongly agree           | Agree                    | Unsure/<br>neutral       | Disagree                 | Strongly disagree        |
|----------------------------------------------------------------------------|--------------------------|--------------------------|--------------------------|--------------------------|--------------------------|
| Slowing the spread of Covid-19 is the right thing to do                    | <input type="checkbox"/> |
| I feel some responsibility for slowing the spread of Covid-19              | <input type="checkbox"/> |
| I am prepared to change my normal behaviour to slow the spread of Covid-19 | <input type="checkbox"/> |
| It is important to work together to slow the spread of Covid-19            | <input type="checkbox"/> |
| I am prepared to make sacrifices to slow the spread of Covid-19            | <input type="checkbox"/> |

### Q5: Involvement with slowing the spread of Covid-19 from New Zealand

We are interested in your opinions about slowing the spread of Covid-19 from New Zealand. How strongly do you agree or disagree with the following statements?

| Item                                                                                           | Strongly agree           | Agree                    | Unsure/<br>neutral       | Disagree                 | Strongly disagree        |
|------------------------------------------------------------------------------------------------|--------------------------|--------------------------|--------------------------|--------------------------|--------------------------|
| I think helping to slow the spread of Covid-19 is rewarding                                    | <input type="checkbox"/> |
| The consequences are serious if we don't slow the spread of Covid-19                           | <input type="checkbox"/> |
| Slowing the spread of Covid-19 is something I am passionate about                              | <input type="checkbox"/> |
| It would be a big deal if government made mistakes while we try to slow the spread of Covid-19 | <input type="checkbox"/> |
| My position on slowing the spread of Covid-19 tells others something about me                  | <input type="checkbox"/> |
| Slowing the spread of Covid-19 is important to me                                              | <input type="checkbox"/> |
| Making decisions about how to slow the spread of Covid-19 is complicated                       | <input type="checkbox"/> |
| What others think about slowing the spread of Covid-19 tells me something about them           | <input type="checkbox"/> |
| I care a lot about slowing the spread of Covid-19                                              | <input type="checkbox"/> |
| Making decisions about how to slow the spread of Covid-19 is difficult                         | <input type="checkbox"/> |

**Q6: Involvement with wearing face masks to help slow the spread of Covid-19?**

The government may require you to wear a face mask in public as one measure to slow the spread of Covid-19. How strongly do you agree or disagree with the following statements about wearing face masks?

| Item                                                                                                          | Strongly agree           | Agree                    | Unsure/<br>neutral       | Disagree                 | Strongly disagree        |
|---------------------------------------------------------------------------------------------------------------|--------------------------|--------------------------|--------------------------|--------------------------|--------------------------|
| I think it's rewarding to wear a face mask to help slow the spread of Covid-19                                | <input type="checkbox"/> |
| The consequences are serious if I made mistakes with wearing a face mask to help slow the spread of Covid-19  | <input type="checkbox"/> |
| Wearing a face mask to help slow the spread of Covid-19 is something I am passionate about                    | <input type="checkbox"/> |
| It would be a big deal if I made a mistake with wearing a face mask to help slow the spread of Covid-19       | <input type="checkbox"/> |
| My position about wearing a face mask to help slow the spread of Covid-19 tells others something about me     | <input type="checkbox"/> |
| Wearing a face mask to help slow the spread of Covid-19 is important to me                                    | <input type="checkbox"/> |
| Making decisions about wearing a face mask to help slow the spread of Covid-19 is complicated                 | <input type="checkbox"/> |
| What others think about wearing a face mask to help slow the spread of Covid-19 tells me something about them | <input type="checkbox"/> |
| I care a lot about wearing a face mask to help slow the spread of Covid-19                                    | <input type="checkbox"/> |
| Making decisions about wearing a face mask to help slow the spread of Covid-19 is difficult                   | <input type="checkbox"/> |

**Q7: Attitude towards wearing a face mask to slow the spread Covid-19**

How strongly do you agree or disagree with the following statements about wearing face masks to slow the spread of Covid-19?

| Item                                                                               | Strongly agree           | Agree                    | Unsure/<br>neutral       | Disagree                 | Strongly disagree        |
|------------------------------------------------------------------------------------|--------------------------|--------------------------|--------------------------|--------------------------|--------------------------|
| I think face masks should be worn to help slow the spread of Covid-19              | <input type="checkbox"/> |
| I think wearing face masks to slow the spread of Covid-19 is the right thing to do | <input type="checkbox"/> |
| I believe it is wrong to wear face masks to slow the spread of Covid-19            | <input type="checkbox"/> |
| I think it would be good to wear face masks to slow the spread of Covid-19         | <input type="checkbox"/> |

**Q8: Which one of the following statements best describes you?**

Please choose one

| Item                                                             | Describes me             |
|------------------------------------------------------------------|--------------------------|
| I really think wearing face masks is the right thing to do       | <input type="checkbox"/> |
| It doesn't really matter to me whether I wear a face mask or not | <input type="checkbox"/> |
| I am not really sure if wearing face masks is the best way to go | <input type="checkbox"/> |
| I haven't put much thought into wearing face masks               | <input type="checkbox"/> |
| I strongly believe that wearing face masks is a bad thing to do  | <input type="checkbox"/> |

### Q9: Perceived advantages and disadvantages of wearing face masks to help slow the spread of Covid-19

How strongly do you agree or disagree with the following statements about wearing face masks to help slow the spread of Covid-19?

| Item                                                                                                    | Strongly agree           | Agree                    | Unsure/<br>neutral       | Disagree                 | Strongly disagree        |
|---------------------------------------------------------------------------------------------------------|--------------------------|--------------------------|--------------------------|--------------------------|--------------------------|
| Face masks are effective in preventing the spread of Covid-19                                           | <input type="checkbox"/> |
| Wearing face masks to slow the spread of Covid-19 is just not practical                                 | <input type="checkbox"/> |
| Face masks are not much help in slowing the spread of Covid-19 because people do not wear them properly | <input type="checkbox"/> |
| Face masks on their own are not much help in preventing the spread of Covid-19                          | <input type="checkbox"/> |
| You should only have to wear a face mask if you feel unwell                                             | <input type="checkbox"/> |
| You should only have to wear a face mask if you are old or have a health problem                        | <input type="checkbox"/> |
| Face masks are not much help unless you wear gloves as well                                             | <input type="checkbox"/> |
| Home-made face masks are a waste of time and effort                                                     | <input type="checkbox"/> |
| Face masks are just too uncomfortable                                                                   | <input type="checkbox"/> |
| The kind of face masks we can buy are not worth bothering with                                          | <input type="checkbox"/> |
| Wearing face mask sets a good example to others                                                         | <input type="checkbox"/> |
| People who wear face masks are over-reacting                                                            | <input type="checkbox"/> |
| Wearing face masks should be compulsory                                                                 | <input type="checkbox"/> |
| Face masks are too difficult and inconvenient if you wear glasses                                       | <input type="checkbox"/> |

**Q10a: Did you wear a face mask whenever you went out in public last week?**

Always Often Sometimes Rarely Never NA

**Q10b: Did you wear a face mask if you had to go out to work last week?**

Always Often Sometimes Rarely Never NA

**Q10c: Did you wear a face mask if you visited with friends at their home last week?**

Always Often Sometimes Rarely Never NA

**Q10d: Did you wear a face mask if you exercised outside last week?**

Always Often Sometimes Rarely Never NA

**Q10e: When you had friends to visit you at your home**

Always Often Sometimes Rarely Never NA

**Q11 Do you have an exemption for wearing a face mask?**

☐ Yes

☐ No

## **Part B: Demographics**

We just have a few questions to make sure we get a good cross-section of people.

**Q12: What age bracket do you fit into?**

☐ 18-29 years

☐ 30-39 years

☐ 40-49 years

☐ 50-59 years

☐ 60-69 years

☐ 70 years and over

☐ Prefer not to say

**Q13: Which of the following do you identify as?**

☐ Male

☐ Female

☐ Gender diverse

☐ Prefer not to say



**Q14: What is your highest level of formal education?**

- ☐ Some or all of secondary school
- ☐ Certificate (1-6)
- ☐ Diploma (5-7)
- ☐ Bachelor degree
- ☐ Post-graduate diploma/certificate
- ☐ Post-graduate degree
- ☐ Prefer not to say

**Q15: What is your ethnicity?**

- ☐ Māori
- ☐ European New Zealander
- ☐ Pacific Islander
- ☐ Asian
- ☐ Other

**Q16: What household income bracket do you fit into?**

- ☐ Less than \$20,000
- ☐ \$20,000 to \$50,000
- ☐ \$50,000 to \$70,000
- ☐ \$70,000 to \$100,000
- ☐ more than \$100,000
- ☐ Prefer not to say

**That is the end of the survey. Do you have any questions?**

**Thank you so much for participating in our survey.**
