# Supplementary material
Source: MDPI journal article supplement (https://www.mdpi.com/2673-8112/3/4/43)
Supplement: s1 [file s1]

Archive with 2 entries (2 files):
- Table S1 Mask_questionnaire journal.doc.pdf
- Table S2 Mask Survey Data journal.xlsx
