# Supplementary material
Source: MDPI journal article supplement (https://www.mdpi.com/2673-8112/3/4/43)
Supplement: s1 [file s1 › Table S2 Mask Survey Data journal.xlsx]

## Sheet: Final Data ALL
Q1 Which of the following regions do you live in?	Q2A Children cannot catch Covid-19	Q2B Once you have had Covid-19 you are immune to re-infection:	Q2C I think Covid-19 is a hoax	Q2D Fears about Covid-19 are exaggerated	Q2E You cannot catch Covid-19 from people with the virus who do not have symptoms	Q2F Covid-19 is only a danger to the elderly and people who already have health problems	Q2G Infected people spread Covid-19 by coughing and sneezing	Q2H Children are perfectly safe from Covid-19	Q2I You can catch Covid-19 by touching anything handled by an infected person	Q2J Covid-19 is no worse than the seasonal flu	Q2K Covid-19 is a real threat to my health	Q2L Getting vaccinated against Covid-19 means you will recover faster	Q2M Getting vaccinated against Covid-19 means your symptoms will be much weaker if you do get the virus	Q2N Once you are vaccinated you cannot catch or spread Covid-19	Q3A We need to slow the spread of Covid-19 to save lives	Q3B We should slow the spread of Covid-19 to keep supply chains functioning	Q3C It would be better to let it spread and build herd immunity	Q3D There is no point trying to slow the spread of Covid-19 because it is a virus and will keep changing	Q3E Covid-19 is everywhere in the world so there is no way we can avoid it	Q3F We need to slow the spread of Covid-19 to reduce the pressure on our health system	Q4A Slowing the spread of Covid-19 is the right thing to do	Q4B I feel some responsibility for slowing the spread of Covid-19	Q4C I am prepared to change my normal behaviour to slow the spread of Covid-19	Q4D It is important to work together to slow the spread of Covid-19	Q4E I am prepared to make sacrifices to slow the spread of Covid-19	Q5A I think helping to slow the spread of Covid-19 is rewarding	Q5B The consequences are serious if we don't slow the spread of Covid-19	Q5C Slowing the spread of Covid-19 is something I am passionate about	Q5D It would be a big deal if government made mistakes while we try to slow the spread of Covid-19	Q5E My position on slowing the spread of Covid-19 tells others something about me	Q5F Slowing the spread of Covid-19 is important to me	Q5G Making decisions about how to slow the spread of Covid-19 is complicated	Q5H What others think about slowing the spread of Covid-19 tells me something about them	Q5I I care a lot about slowing the spread of Covid-19	Q5J Making decisions about how to slow the spread of Covid-19 is difficult	Q6A I think it's rewarding to wear a face mask to help slow the spread of Covid-19	Q6B The consequences are serious if I made mistakes with wearing a face mask to help slow the spread of Covid-19	Q6C Wearing a face mask to help slow the spread of Covid-19 is something I am passionate about	Q6D It would be a big deal if I made a mistake with wearing a face mask to help slow the spread of Covid-19	Q6E My position about wearing a face mask to help slow the spread of Covid-19 tells others something about me	Q6F Wearing a face mask to help slow the spread of Covid-19 is important to me	Q6G Making decisions about wearing a face mask to help slow the spread of Covid-19 is complicated	Q6H What others think about wearing a face mask to help slow the spread of Covid-19 tells me something about them	Q6I I care a lot about wearing a face mask to help slow the spread of Covid-19	Q6J Making decisions about wearing a face mask to help slow the spread of Covid-19 is difficult	Q7A I think face masks should be worn to help slow the spread of Covid-19	Q7B I think wearing face masks to slow the spread of Covid-19 is the right thing to do	Q7C I believe it is wrong to wear face masks to slow the spread of Covid-19	Q7D I think it would be good to wear face masks to slow the spread of Covid-19
Auckland Region	Strongly disagree	Unsure/neutral	Strongly disagree	Unsure/neutral	Disagree	Strongly disagree	Agree	Strongly disagree	Unsure/neutral	Disagree	Agree	Unsure/neutral	Agree	Disagree	Disagree	Disagree	Agree	Strongly agree	Strongly agree	Disagree	Unsure/neutral	Unsure/neutral	Unsure/neutral	Strongly agree	Unsure/neutral	Unsure/neutral	Disagree	Disagree	Agree	Unsure/neutral	Unsure/neutral	Agree	Unsure/neutral	Unsure/neutral	Agree	Disagree	Disagree	Disagree	Unsure/neutral	Disagree	Disagree	Disagree	Disagree	Disagree	Disagree	Unsure/neutral	Unsure/neutral	Disagree	Unsure/neutral
Auckland Region	Strongly disagree	Strongly agree	Strongly disagree	Unsure/neutral	Strongly agree	Strongly disagree	Strongly agree	Strongly disagree	Unsure/neutral	Disagree	Agree	Strongly agree	Strongly agree	Disagree	Strongly agree	Strongly agree	Strongly disagree	Strongly disagree	Strongly disagree	Strongly agree	Strongly agree	Strongly agree	Strongly agree	Strongly agree	Strongly agree	Strongly agree	Strongly agree	Strongly agree	Unsure/neutral	Strongly agree	Strongly agree	Strongly agree	Strongly agree	Strongly agree	Unsure/neutral	Strongly agree	Strongly agree	Strongly agree	Strongly agree	Strongly agree	Strongly agree	Unsure/neutral	Strongly agree	Strongly agree	Unsure/neutral	Strongly agree	Strongly agree	Strongly disagree	Strongly agree
Auckland Region	Disagree	Disagree	Strongly disagree	Agree	Disagree	Disagree	Agree	Disagree	Unsure/neutral	Strongly disagree	Agree	Unsure/neutral	Strongly disagree	Disagree	Strongly agree	Agree	Disagree	Agree	Agree	Strongly agree	Strongly agree	Strongly agree	Agree	Strongly agree	Strongly agree	Strongly agree	Strongly agree	Strongly agree	Disagree	Strongly agree	Strongly agree	Disagree	Agree	Strongly agree	Disagree	Agree	Disagree	Agree	Disagree	Agree	Agree	Agree	Agree	Agree	Disagree	Strongly agree	Strongly agree	Strongly disagree	Strongly agree
Southland Region	Strongly disagree	Disagree	Strongly disagree	Disagree	Strongly disagree	Strongly disagree	Strongly agree	Strongly disagree	Agree	Disagree	Agree	Strongly agree	Strongly agree	Disagree	Strongly agree	Strongly agree	Strongly disagree	Disagree	Disagree	Strongly agree	Agree	Agree	Agree	Strongly agree	Agree	Agree	Strongly agree	Agree	Strongly agree	Agree	Agree	Disagree	Agree	Agree	Disagree	Strongly agree	Agree	Strongly agree	Agree	Agree	Agree	Strongly disagree	Strongly agree	Agree	Strongly disagree	Strongly agree	Strongly agree	Disagree	Strongly agree
Bay of Plenty Region	Strongly disagree	Disagree	Strongly disagree	Disagree	Strongly disagree	Disagree	Strongly agree	Unsure/neutral	Strongly agree	Disagree	Agree	Agree	Unsure/neutral	Strongly disagree	Strongly agree	Agree	Disagree	Disagree	Agree	Strongly agree	Agree	Agree	Agree	Agree	Agree	Agree	Agree	Agree	Agree	Unsure/neutral	Agree	Agree	Agree	Agree	Unsure/neutral	Unsure/neutral	Unsure/neutral	Unsure/neutral	Unsure/neutral	Agree	Agree	Unsure/neutral	Agree	Unsure/neutral	Agree	Agree	Agree	Unsure/neutral	Agree
Auckland Region	Strongly disagree	Strongly disagree	Strongly disagree	Strongly disagree	Disagree	Strongly disagree	Agree	Strongly disagree	Agree	Strongly disagree	Agree	Unsure/neutral	Agree	Strongly disagree	Strongly agree	Agree	Disagree	Unsure/neutral	Agree	Strongly agree	Strongly agree	Agree	Strongly agree	Strongly agree	Strongly agree	Strongly agree	Strongly agree	Agree	Unsure/neutral	Unsure/neutral	Strongly agree	Agree	Agree	Strongly agree	Agree	Strongly agree	Agree	Strongly agree	Unsure/neutral	Unsure/neutral	Strongly agree	Strongly disagree	Agree	Strongly agree	Strongly disagree	Strongly agree	Strongly agree	Strongly disagree	Strongly agree
Manawatu-Whanganui Region	Strongly disagree	Unsure/neutral	Strongly disagree	Disagree	Disagree	Disagree	Agree	Disagree	Agree	Unsure/neutral	Agree	Disagree	Disagree	Disagree	Agree	Unsure/neutral	Unsure/neutral	Unsure/neutral	Unsure/neutral	Agree	Agree	Agree	Agree	Agree	Agree	Unsure/neutral	Unsure/neutral	Agree	Agree	Agree	Strongly agree	Strongly agree	Agree	Agree	Agree	Strongly agree	Unsure/neutral	Strongly agree	Unsure/neutral	Agree	Strongly agree	Disagree	Agree	Strongly agree	Disagree	Strongly agree	Strongly agree	Strongly disagree	Agree
Southland Region	Strongly disagree	Strongly disagree	Strongly disagree	Strongly disagree	Strongly disagree	Strongly disagree	Strongly agree	Strongly disagree	Unsure/neutral	Strongly disagree	Strongly agree	Agree	Strongly agree	Strongly disagree	Strongly agree	Strongly agree	Strongly disagree	Strongly disagree	Agree	Strongly agree	Agree	Strongly agree	Strongly agree	Strongly agree	Strongly agree	Unsure/neutral	Agree	Agree	Agree	Agree	Strongly agree	Agree	Agree	Strongly agree	Agree	Disagree	Unsure/neutral	Unsure/neutral	Agree	Agree	Agree	Strongly disagree	Agree	Agree	Strongly disagree	Strongly agree	Strongly agree	Strongly disagree	Strongly agree
Canterbury Region	Strongly disagree	Disagree	Strongly disagree	Strongly disagree	Disagree	Disagree	Agree	Disagree	Unsure/neutral	Disagree	Agree	Agree	Agree	Disagree	Agree	Unsure/neutral	Unsure/neutral	Agree	Agree	Agree	Agree	Agree	Agree	Agree	Agree	Agree	Agree	Unsure/neutral	Agree	Agree	Agree	Agree	Agree	Agree	Unsure/neutral	Agree	Agree	Agree	Agree	Agree	Agree	Disagree	Unsure/neutral	Agree	Disagree	Agree	Agree	Strongly disagree	Agree
Waikato Region	Strongly disagree	Disagree	Strongly disagree	Unsure/neutral	Agree	Unsure/neutral	Agree	Strongly disagree	Agree	Unsure/neutral	Unsure/neutral	Unsure/neutral	Agree	Strongly disagree	Agree	Unsure/neutral	Disagree	Agree	Agree	Agree	Unsure/neutral	Unsure/neutral	Agree	Agree	Agree	Unsure/neutral	Unsure/neutral	Unsure/neutral	Unsure/neutral	Unsure/neutral	Unsure/neutral	Strongly agree	Unsure/neutral	Unsure/neutral	Strongly agree	Disagree	Unsure/neutral	Unsure/neutral	Disagree	Agree	Unsure/neutral	Disagree	Agree	Unsure/neutral	Unsure/neutral	Agree	Agree	Strongly disagree	Agree
Auckland Region	Strongly disagree	Disagree	Strongly disagree	Disagree	Disagree	Disagree	Strongly agree	Disagree	Disagree	Disagree	Unsure/neutral	Agree	Agree	Disagree	Unsure/neutral	Agree	Agree	Agree	Strongly agree	Agree	Agree	Agree	Agree	Agree	Agree	Unsure/neutral	Agree	Unsure/neutral	Disagree	Agree	Agree	Agree	Unsure/neutral	Agree	Agree	Strongly disagree	Disagree	Unsure/neutral	Disagree	Unsure/neutral	Unsure/neutral	Disagree	Agree	Unsure/neutral	Unsure/neutral	Unsure/neutral	Agree	Disagree	Unsure/neutral
Auckland Region	Disagree	Disagree	Strongly disagree	Unsure/neutral	Disagree	Disagree	Unsure/neutral	Disagree	Agree	Disagree	Agree	Agree	Strongly agree	Disagree	Agree	Agree	Agree	Unsure/neutral	Agree	Agree	Agree	Unsure/neutral	Agree	Agree	Agree	Unsure/neutral	Unsure/neutral	Unsure/neutral	Agree	Unsure/neutral	Unsure/neutral	Agree	Agree	Agree	Agree	Strongly agree	Agree	Strongly agree	Unsure/neutral	Strongly agree	Strongly agree	Agree	Agree	Strongly agree	Strongly agree	Agree	Agree	Disagree	Agree
Bay of Plenty Region	Strongly disagree	Disagree	Strongly disagree	Agree	Strongly disagree	Disagree	Strongly agree	Disagree	Agree	Disagree	Unsure/neutral	Agree	Strongly agree	Disagree	Agree	Agree	Unsure/neutral	Disagree	Agree	Agree	Agree	Agree	Unsure/neutral	Strongly agree	Agree	Agree	Unsure/neutral	Disagree	Disagree	Agree	Agree	Agree	Agree	Agree	Agree	Agree	Disagree	Disagree	Disagree	Agree	Agree	Disagree	Agree	Agree	Disagree	Agree	Agree	Disagree	Agree
Wellington Region	Strongly disagree	Unsure/neutral	Strongly disagree	Unsure/neutral	Strongly disagree	Strongly disagree	Strongly agree	Strongly disagree	Unsure/neutral	Unsure/neutral	Agree	Unsure/neutral	Strongly agree	Strongly disagree	Agree	Agree	Unsure/neutral	Unsure/neutral	Agree	Agree	Agree	Agree	Agree	Agree	Agree	Unsure/neutral	Agree	Agree	Unsure/neutral	Unsure/neutral	Agree	Agree	Unsure/neutral	Agree	Agree	Unsure/neutral	Agree	Agree	Unsure/neutral	Unsure/neutral	Agree	Unsure/neutral	Unsure/neutral	Agree	Unsure/neutral	Agree	Agree	Disagree	Agree
Auckland Region	Disagree	Unsure/neutral	Disagree	Unsure/neutral	Disagree	Unsure/neutral	Agree	Unsure/neutral	Unsure/neutral	Disagree	Agree	Unsure/neutral	Agree	Strongly disagree	Unsure/neutral	Unsure/neutral	Unsure/neutral	Agree	Strongly agree	Unsure/neutral	Unsure/neutral	Unsure/neutral	Unsure/neutral	Unsure/neutral	Unsure/neutral	Unsure/neutral	Unsure/neutral	Unsure/neutral	Agree	Unsure/neutral	Unsure/neutral	Unsure/neutral	Unsure/neutral	Unsure/neutral	Agree	Unsure/neutral	Unsure/neutral	Unsure/neutral	Unsure/neutral	Unsure/neutral	Agree	Agree	Unsure/neutral	Agree	Unsure/neutral	Agree	Agree	Disagree	Unsure/neutral
Wellington Region	Disagree	Disagree	Strongly disagree	Agree	Strongly disagree	Disagree	Strongly agree	Disagree	Disagree	Unsure/neutral	Disagree	Agree	Agree	Strongly disagree	Unsure/neutral	Unsure/neutral	Unsure/neutral	Unsure/neutral	Strongly agree	Agree	Agree	Agree	Agree	Agree	Agree	Unsure/neutral	Agree	Strongly disagree	Strongly agree	Unsure/neutral	Strongly disagree	Strongly agree	Agree	Unsure/neutral	Agree	Disagree	Unsure/neutral	Disagree	Disagree	Unsure/neutral	Strongly disagree	Disagree	Agree	Disagree	Unsure/neutral	Disagree	Unsure/neutral	Disagree	Agree
Auckland Region	Strongly disagree	Strongly disagree	Strongly disagree	Strongly disagree	Strongly disagree	Strongly disagree	Strongly agree	Strongly disagree	Disagree	Disagree	Agree	Agree	Strongly agree	Strongly disagree	Disagree	Strongly agree	Agree	Agree	Agree	Disagree	Unsure/neutral	Agree	Agree	Strongly agree	Agree	Agree	Agree	Unsure/neutral	Unsure/neutral	Agree	Agree	Strongly agree	Agree	Agree	Strongly agree	Agree	Agree	Agree	Agree	Agree	Agree	Strongly disagree	Agree	Agree	Strongly disagree	Strongly agree	Strongly agree	Strongly disagree	Strongly agree
Otago Region	Strongly agree	Disagree	Strongly disagree	Disagree	Strongly agree	Disagree	Agree	Disagree	Agree	Disagree	Strongly disagree	Agree	Agree	Strongly disagree	Agree	Agree	Disagree	Disagree	Disagree	Agree	Agree	Agree	Agree	Agree	Unsure/neutral	Agree	Agree	Unsure/neutral	Agree	Agree	Agree	Agree	Unsure/neutral	Agree	Agree	Unsure/neutral	Agree	Agree	Unsure/neutral	Unsure/neutral	Agree	Disagree	Unsure/neutral	Agree	Unsure/neutral	Agree	Agree	Disagree	Agree
Auckland Region	Strongly disagree	Strongly disagree	Strongly disagree	Disagree	Strongly disagree	Disagree	Agree	Disagree	Unsure/neutral	Disagree	Agree	Agree	Agree	Strongly disagree	Unsure/neutral	Unsure/neutral	Unsure/neutral	Strongly agree	Strongly agree	Unsure/neutral	Agree	Agree	Agree	Strongly agree	Agree	Unsure/neutral	Agree	Unsure/neutral	Unsure/neutral	Agree	Agree	Agree	Unsure/neutral	Unsure/neutral	Agree	Agree	Unsure/neutral	Agree	Disagree	Unsure/neutral	Agree	Disagree	Agree	Agree	Unsure/neutral	Agree	Agree	Disagree	Agree
Auckland Region	Strongly disagree	Disagree	Strongly disagree	Agree	Disagree	Strongly agree	Agree	Unsure/neutral	Agree	Agree	Disagree	Agree	Strongly agree	Disagree	Strongly disagree	Disagree	Strongly agree	Strongly agree	Strongly agree	Disagree	Disagree	Disagree	Strongly disagree	Disagree	Strongly disagree	Strongly disagree	Disagree	Strongly disagree	Strongly disagree	Unsure/neutral	Strongly disagree	Disagree	Unsure/neutral	Strongly disagree	Disagree	Disagree	Strongly disagree	Disagree	Strongly disagree	Unsure/neutral	Disagree	Disagree	Unsure/neutral	Disagree	Disagree	Disagree	Disagree	Disagree	Disagree
Waikato Region	Strongly disagree	Agree	Strongly disagree	Strongly disagree	Strongly disagree	Strongly disagree	Strongly agree	Strongly disagree	Strongly agree	Disagree	Agree	Agree	Agree	Strongly disagree	Agree	Strongly agree	Strongly disagree	Disagree	Agree	Strongly agree	Strongly agree	Strongly agree	Strongly agree	Strongly agree	Strongly agree	Agree	Strongly agree	Agree	Agree	Agree	Strongly agree	Strongly agree	Agree	Agree	Strongly agree	Agree	Agree	Agree	Agree	Agree	Agree	Disagree	Agree	Agree	Disagree	Strongly agree	Strongly agree	Strongly agree	Strongly agree
Waikato Region	Strongly disagree	Disagree	Strongly disagree	Strongly disagree	Strongly disagree	Strongly disagree	Strongly agree	Strongly disagree	Unsure/neutral	Strongly disagree	Strongly agree	Strongly agree	Strongly agree	Strongly disagree	Strongly agree	Strongly agree	Strongly disagree	Strongly disagree	Agree	Strongly agree	Strongly agree	Strongly agree	Strongly agree	Strongly agree	Strongly agree	Strongly agree	Strongly agree	Strongly agree	Strongly agree	Strongly agree	Strongly agree	Strongly agree	Strongly agree	Strongly agree	Strongly agree	Strongly agree	Strongly agree	Strongly agree	Strongly agree	Strongly agree	Strongly agree	Strongly disagree	Strongly agree	Strongly agree	Strongly disagree	Strongly agree	Strongly agree	Strongly disagree	Strongly agree
Manawatu-Whanganui Region	Strongly disagree	Disagree	Strongly disagree	Strongly disagree	Agree	Disagree	Agree	Disagree	Agree	Disagree	Agree	Agree	Strongly agree	Disagree	Strongly agree	Agree	Strongly disagree	Strongly disagree	Disagree	Strongly agree	Agree	Agree	Agree	Strongly agree	Agree	Agree	Agree	Agree	Disagree	Unsure/neutral	Agree	Disagree	Unsure/neutral	Agree	Disagree	Agree	Disagree	Strongly agree	Strongly disagree	Unsure/neutral	Strongly agree	Disagree	Unsure/neutral	Strongly agree	Disagree	Strongly agree	Strongly agree	Strongly disagree	Strongly agree
Wellington Region	Strongly disagree	Disagree	Disagree	Agree	Disagree	Agree	Agree	Disagree	Disagree	Agree	Disagree	Agree	Unsure/neutral	Strongly disagree	Disagree	Agree	Agree	Agree	Agree	Strongly agree	Disagree	Disagree	Agree	Agree	Unsure/neutral	Strongly disagree	Disagree	Strongly disagree	Agree	Disagree	Disagree	Disagree	Disagree	Strongly disagree	Disagree	Strongly disagree	Disagree	Strongly disagree	Disagree	Disagree	Strongly disagree	Disagree	Strongly disagree	Strongly disagree	Strongly disagree	Disagree	Agree	Disagree	Disagree
Canterbury Region	Disagree	Unsure/neutral	Strongly disagree	Disagree	Disagree	Disagree	Agree	Disagree	Agree	Disagree	Strongly agree	Agree	Agree	Unsure/neutral	Agree	Agree	Disagree	Disagree	Disagree	Unsure/neutral	Agree	Disagree	Strongly agree	Strongly agree	Agree	Agree	Agree	Unsure/neutral	Agree	Unsure/neutral	Agree	Agree	Unsure/neutral	Agree	Agree	Agree	Unsure/neutral	Agree	Unsure/neutral	Unsure/neutral	Agree	Disagree	Unsure/neutral	Agree	Disagree	Agree	Agree	Disagree	Agree
Canterbury Region	Strongly disagree	Strongly disagree	Unsure/neutral	Disagree	Disagree	Disagree	Strongly agree	Disagree	Agree	Disagree	Agree	Unsure/neutral	Unsure/neutral	Strongly disagree	Strongly agree	Agree	Disagree	Disagree	Unsure/neutral	Agree	Agree	Disagree	Agree	Agree	Unsure/neutral	Unsure/neutral	Agree	Unsure/neutral	Unsure/neutral	Disagree	Agree	Agree	Disagree	Agree	Agree	Unsure/neutral	Unsure/neutral	Disagree	Unsure/neutral	Disagree	Agree	Disagree	Disagree	Unsure/neutral	Disagree	Agree	Agree	Disagree	Agree
Southland Region	Strongly disagree	Unsure/neutral	Strongly disagree	Strongly disagree	Strongly disagree	Strongly disagree	Strongly agree	Strongly disagree	Agree	Strongly disagree	Agree	Agree	Agree	Strongly disagree	Agree	Agree	Unsure/neutral	Agree	Agree	Agree	Agree	Agree	Agree	Agree	Agree	Disagree	Unsure/neutral	Strongly agree	Disagree	Agree	Strongly agree	Agree	Disagree	Agree	Agree	Agree	Disagree	Agree	Disagree	Strongly agree	Agree	Strongly disagree	Agree	Strongly agree	Strongly disagree	Strongly agree	Strongly agree	Strongly disagree	Strongly agree
Wellington Region	Disagree	Disagree	Strongly disagree	Disagree	Disagree	Disagree	Strongly agree	Disagree	Unsure/neutral	Disagree	Disagree	Agree	Agree	Unsure/neutral	Agree	Agree	Unsure/neutral	Unsure/neutral	Agree	Agree	Agree	Agree	Agree	Agree	Agree	Disagree	Agree	Disagree	Agree	Unsure/neutral	Unsure/neutral	Agree	Agree	Unsure/neutral	Strongly agree	Disagree	Agree	Unsure/neutral	Unsure/neutral	Unsure/neutral	Agree	Unsure/neutral	Unsure/neutral	Agree	Disagree	Agree	Agree	Strongly disagree	Agree
Marlborough Region	Strongly disagree	Unsure/neutral	Strongly disagree	Agree	Unsure/neutral	Unsure/neutral	Agree	Strongly disagree	Unsure/neutral	Unsure/neutral	Agree	Unsure/neutral	Unsure/neutral	Strongly disagree	Disagree	Unsure/neutral	Agree	Strongly agree	Strongly agree	Agree	Disagree	Disagree	Disagree	Disagree	Disagree	Disagree	Strongly disagree	Strongly disagree	Strongly agree	Strongly disagree	Strongly disagree	Disagree	Strongly disagree	Strongly disagree	Strongly disagree	Strongly disagree	Strongly disagree	Strongly disagree	Strongly disagree	Strongly disagree	Strongly disagree	Strongly disagree	Strongly disagree	Strongly disagree	Strongly disagree	Agree	Agree	Disagree	Agree
Auckland Region	Strongly disagree	Disagree	Strongly disagree	Disagree	Strongly disagree	Strongly disagree	Agree	Disagree	Agree	Disagree	Agree	Agree	Strongly agree	Strongly disagree	Agree	Strongly agree	Unsure/neutral	Disagree	Agree	Strongly agree	Agree	Agree	Agree	Strongly agree	Agree	Unsure/neutral	Agree	Agree	Agree	Agree	Agree	Agree	Strongly agree	Agree	Agree	Unsure/neutral	Agree	Agree	Agree	Strongly agree	Agree	Disagree	Strongly agree	Agree	Disagree	Agree	Agree	Disagree	Agree
Waikato Region	Disagree	Disagree	Strongly disagree	Disagree	Disagree	Disagree	Agree	Disagree	Agree	Disagree	Agree	Disagree	Agree	Disagree	Disagree	Agree	Disagree	Disagree	Agree	Agree	Strongly agree	Agree	Agree	Agree	Agree	Agree	Agree	Agree	Disagree	Strongly agree	Agree	Disagree	Strongly agree	Strongly agree	Disagree	Strongly agree	Agree	Agree	Agree	Agree	Agree	Disagree	Agree	Agree	Disagree	Strongly agree	Strongly agree	Strongly agree	Strongly agree
Tasman/ Nelson Region	Strongly disagree	Strongly disagree	Strongly disagree	Disagree	Strongly disagree	Strongly disagree	Strongly agree	Strongly disagree	Strongly agree	Strongly disagree	Agree	Agree	Strongly agree	Strongly disagree	Strongly agree	Strongly agree	Disagree	Disagree	Disagree	Strongly agree	Strongly agree	Strongly agree	Strongly agree	Strongly agree	Strongly agree	Agree	Strongly agree	Agree	Agree	Agree	Strongly agree	Agree	Agree	Strongly agree	Agree	Strongly agree	Agree	Strongly agree	Agree	Strongly agree	Strongly agree	Strongly disagree	Agree	Strongly agree	Strongly disagree	Strongly agree	Strongly agree	Strongly disagree	Strongly agree
Waikato Region	Strongly disagree	Unsure/neutral	Strongly disagree	Disagree	Disagree	Strongly disagree	Unsure/neutral	Strongly disagree	Agree	Unsure/neutral	Agree	Disagree	Agree	Disagree	Disagree	Disagree	Agree	Agree	Agree	Unsure/neutral	Disagree	Unsure/neutral	Disagree	Unsure/neutral	Strongly disagree	Disagree	Disagree	Disagree	Unsure/neutral	Disagree	Unsure/neutral	Disagree	Disagree	Disagree	Disagree	Strongly disagree	Disagree	Strongly disagree	Strongly disagree	Strongly disagree	Strongly disagree	Strongly disagree	Strongly disagree	Strongly disagree	Strongly disagree	Strongly disagree	Strongly disagree	Agree	Strongly disagree
Wellington Region	Disagree	Disagree	Disagree	Strongly agree	Disagree	Strongly disagree	Agree	Strongly disagree	Agree	Agree	Agree	Agree	Agree	Strongly disagree	Disagree	Strongly agree	Strongly agree	Disagree	Strongly agree	Strongly agree	Strongly disagree	Strongly disagree	Strongly disagree	Agree	Strongly disagree	Disagree	Disagree	Disagree	Disagree	Disagree	Disagree	Disagree	Disagree	Disagree	Disagree	Unsure/neutral	Unsure/neutral	Unsure/neutral	Disagree	Agree	Unsure/neutral	Disagree	Unsure/neutral	Agree	Agree	Agree	Agree	Disagree	Disagree
Canterbury Region	Disagree	Unsure/neutral	Strongly disagree	Agree	Disagree	Unsure/neutral	Agree	Unsure/neutral	Disagree	Unsure/neutral	Unsure/neutral	Unsure/neutral	Unsure/neutral	Strongly disagree	Unsure/neutral	Unsure/neutral	Unsure/neutral	Unsure/neutral	Agree	Unsure/neutral	Unsure/neutral	Unsure/neutral	Disagree	Unsure/neutral	Unsure/neutral	Disagree	Unsure/neutral	Disagree	Unsure/neutral	Unsure/neutral	Unsure/neutral	Agree	Unsure/neutral	Disagree	Disagree	Disagree	Disagree	Agree	Unsure/neutral	Agree	Unsure/neutral	Unsure/neutral	Unsure/neutral	Unsure/neutral	Disagree	Agree	Unsure/neutral	Disagree	Unsure/neutral
Southland Region	Strongly disagree	Strongly disagree	Strongly disagree	Strongly agree	Strongly disagree	Strongly disagree	Strongly agree	Strongly disagree	Strongly disagree	Strongly disagree	Strongly agree	Agree	Strongly agree	Strongly disagree	Strongly agree	Strongly agree	Strongly disagree	Strongly disagree	Strongly agree	Strongly agree	Strongly agree	Agree	Agree	Strongly agree	Strongly agree	Agree	Agree	Strongly agree	Disagree	Agree	Strongly agree	Agree	Agree	Strongly agree	Agree	Agree	Disagree	Strongly agree	Strongly disagree	Agree	Strongly agree	Strongly disagree	Strongly agree	Strongly agree	Disagree	Strongly agree	Strongly agree	Strongly disagree	Strongly agree
Manawatu-Whanganui Region	Strongly disagree	Unsure/neutral	Strongly disagree	Agree	Disagree	Disagree	Agree	Disagree	Agree	Agree	Agree	Unsure/neutral	Agree	Disagree	Unsure/neutral	Unsure/neutral	Strongly agree	Agree	Strongly agree	Unsure/neutral	Agree	Unsure/neutral	Agree	Agree	Unsure/neutral	Unsure/neutral	Disagree	Unsure/neutral	Agree	Agree	Agree	Agree	Agree	Unsure/neutral	Agree	Unsure/neutral	Disagree	Unsure/neutral	Unsure/neutral	Unsure/neutral	Unsure/neutral	Disagree	Unsure/neutral	Unsure/neutral	Disagree	Agree	Agree	Disagree	Unsure/neutral
West Coast Region	Strongly disagree	Disagree	Strongly disagree	Disagree	Strongly disagree	Strongly disagree	Strongly agree	Strongly disagree	Disagree	Strongly disagree	Agree	Unsure/neutral	Agree	Strongly disagree	Strongly agree	Strongly agree	Strongly disagree	Strongly disagree	Agree	Strongly agree	Strongly agree	Agree	Strongly agree	Strongly agree	Strongly agree	Agree	Strongly agree	Strongly agree	Disagree	Agree	Strongly agree	Agree	Agree	Strongly agree	Disagree	Agree	Strongly agree	Agree	Agree	Agree	Agree	Strongly disagree	Agree	Agree	Strongly disagree	Strongly agree	Strongly agree	Strongly disagree	Strongly agree
Hawke's Bay Region	Unsure/neutral	Unsure/neutral	Disagree	Unsure/neutral	Unsure/neutral	Unsure/neutral	Unsure/neutral	Unsure/neutral	Unsure/neutral	Unsure/neutral	Agree	Unsure/neutral	Unsure/neutral	Unsure/neutral	Agree	Unsure/neutral	Unsure/neutral	Unsure/neutral	Agree	Agree	Unsure/neutral	Agree	Agree	Unsure/neutral	Agree	Agree	Unsure/neutral	Agree	Agree	Unsure/neutral	Unsure/neutral	Unsure/neutral	Agree	Unsure/neutral	Unsure/neutral	Unsure/neutral	Agree	Agree	Agree	Unsure/neutral	Unsure/neutral	Agree	Agree	Unsure/neutral	Unsure/neutral	Unsure/neutral	Agree	Agree	Unsure/neutral
Wellington Region	Strongly disagree	Strongly disagree	Strongly disagree	Unsure/neutral	Strongly disagree	Strongly disagree	Strongly agree	Disagree	Unsure/neutral	Strongly disagree	Strongly agree	Strongly disagree	Strongly agree	Strongly disagree	Agree	Strongly agree	Disagree	Unsure/neutral	Agree	Strongly agree	Strongly agree	Strongly agree	Strongly agree	Strongly agree	Strongly agree	Agree	Agree	Agree	Strongly agree	Unsure/neutral	Agree	Unsure/neutral	Unsure/neutral	Agree	Unsure/neutral	Agree	Agree	Agree	Disagree	Agree	Strongly agree	Strongly disagree	Agree	Agree	Strongly disagree	Strongly agree	Strongly agree	Strongly disagree	Agree
Auckland Region	Strongly disagree	Unsure/neutral	Disagree	Agree	Disagree	Strongly disagree	Strongly agree	Unsure/neutral	Strongly agree	Unsure/neutral	Strongly agree	Strongly agree	Strongly agree	Disagree	Strongly agree	Strongly agree	Unsure/neutral	Agree	Strongly agree	Strongly agree	Strongly agree	Strongly agree	Strongly agree	Strongly agree	Strongly agree	Strongly agree	Strongly agree	Strongly agree	Strongly agree	Strongly agree	Strongly agree	Strongly agree	Strongly agree	Strongly agree	Unsure/neutral	Strongly agree	Strongly agree	Strongly agree	Unsure/neutral	Strongly agree	Strongly agree	Disagree	Strongly agree	Strongly agree	Disagree	Strongly agree	Strongly agree	Disagree	Strongly agree
Auckland Region	Disagree	Disagree	Strongly disagree	Agree	Disagree	Unsure/neutral	Agree	Disagree	Disagree	Disagree	Unsure/neutral	Agree	Agree	Disagree	Disagree	Agree	Agree	Unsure/neutral	Strongly agree	Unsure/neutral	Unsure/neutral	Agree	Unsure/neutral	Unsure/neutral	Unsure/neutral	Unsure/neutral	Unsure/neutral	Disagree	Agree	Disagree	Unsure/neutral	Agree	Disagree	Unsure/neutral	Unsure/neutral	Disagree	Disagree	Disagree	Disagree	Disagree	Unsure/neutral	Unsure/neutral	Disagree	Unsure/neutral	Agree	Unsure/neutral	Agree	Disagree	Unsure/neutral
Wellington Region	Unsure/neutral	Unsure/neutral	Unsure/neutral	Strongly agree	Unsure/neutral	Unsure/neutral	Agree	Unsure/neutral	Unsure/neutral	Unsure/neutral	Unsure/neutral	Agree	Unsure/neutral	Unsure/neutral	Agree	Agree	Unsure/neutral	Unsure/neutral	Unsure/neutral	Unsure/neutral	Agree	Agree	Unsure/neutral	Agree	Unsure/neutral	Agree	Unsure/neutral	Agree	Unsure/neutral	Agree	Agree	Agree	Unsure/neutral	Agree	Unsure/neutral	Unsure/neutral	Unsure/neutral	Agree	Unsure/neutral	Unsure/neutral	Agree	Unsure/neutral	Unsure/neutral	Agree	Unsure/neutral	Agree	Agree	Unsure/neutral	Agree
Auckland Region	Disagree	Disagree	Strongly disagree	Unsure/neutral	Disagree	Disagree	Strongly disagree	Disagree	Unsure/neutral	Unsure/neutral	Agree	Unsure/neutral	Agree	Disagree	Strongly agree	Agree	Unsure/neutral	Disagree	Agree	Strongly agree	Strongly agree	Agree	Agree	Strongly agree	Agree	Agree	Strongly agree	Agree	Agree	Agree	Strongly agree	Agree	Strongly agree	Strongly agree	Unsure/neutral	Unsure/neutral	Agree	Agree	Agree	Agree	Strongly agree	Disagree	Strongly agree	Strongly agree	Disagree	Strongly agree	Strongly agree	Disagree	Agree
Waikato Region	Disagree	Disagree	Strongly disagree	Strongly disagree	Disagree	Strongly disagree	Agree	Disagree	Disagree	Strongly disagree	Agree	Agree	Agree	Disagree	Strongly agree	Strongly agree	Disagree	Disagree	Agree	Strongly agree	Strongly agree	Strongly agree	Strongly agree	Strongly agree	Strongly agree	Agree	Agree	Unsure/neutral	Unsure/neutral	Unsure/neutral	Agree	Agree	Unsure/neutral	Agree	Agree	Agree	Agree	Agree	Agree	Agree	Agree	Agree	Agree	Agree	Disagree	Agree	Agree	Disagree	Agree
Taranaki Region	Strongly disagree	Disagree	Strongly disagree	Unsure/neutral	Disagree	Agree	Strongly agree	Disagree	Unsure/neutral	Agree	Disagree	Strongly agree	Strongly agree	Strongly disagree	Agree	Disagree	Agree	Strongly agree	Strongly agree	Unsure/neutral	Agree	Disagree	Disagree	Unsure/neutral	Disagree	Unsure/neutral	Agree	Disagree	Agree	Disagree	Unsure/neutral	Disagree	Disagree	Unsure/neutral	Disagree	Disagree	Unsure/neutral	Disagree	Disagree	Disagree	Disagree	Disagree	Disagree	Strongly disagree	Disagree	Unsure/neutral	Unsure/neutral	Disagree	Unsure/neutral
Canterbury Region	Disagree	Disagree	Unsure/neutral	Unsure/neutral	Disagree	Strongly disagree	Unsure/neutral	Unsure/neutral	Unsure/neutral	Unsure/neutral	Unsure/neutral	Unsure/neutral	Unsure/neutral	Strongly disagree	Agree	Agree	Unsure/neutral	Agree	Agree	Agree	Unsure/neutral	Agree	Unsure/neutral	Agree	Agree	Unsure/neutral	Unsure/neutral	Strongly disagree	Strongly agree	Disagree	Unsure/neutral	Unsure/neutral	Disagree	Unsure/neutral	Disagree	Strongly disagree	Disagree	Strongly disagree	Strongly disagree	Disagree	Disagree	Strongly disagree	Disagree	Strongly disagree	Strongly disagree	Unsure/neutral	Unsure/neutral	Unsure/neutral	Unsure/neutral
Auckland Region	Strongly disagree	Strongly disagree	Strongly disagree	Disagree	Strongly disagree	Strongly disagree	Agree	Strongly disagree	Strongly agree	Strongly disagree	Agree	Agree	Agree	Strongly disagree	Agree	Strongly agree	Disagree	Unsure/neutral	Strongly agree	Strongly agree	Strongly agree	Strongly agree	Strongly agree	Strongly agree	Strongly agree	Agree	Strongly agree	Agree	Unsure/neutral	Agree	Agree	Agree	Agree	Agree	Agree	Strongly agree	Strongly agree	Strongly agree	Strongly agree	Strongly agree	Strongly agree	Disagree	Agree	Strongly agree	Strongly agree	Strongly agree	Strongly agree	Strongly disagree	Strongly agree
Hawke's Bay Region	Disagree	Disagree	Strongly disagree	Agree	Unsure/neutral	Strongly disagree	Agree	Disagree	Agree	Disagree	Strongly agree	Agree	Agree	Disagree	Strongly agree	Agree	Disagree	Agree	Disagree	Strongly agree	Strongly agree	Unsure/neutral	Agree	Strongly agree	Agree	Strongly agree	Strongly agree	Agree	Disagree	Disagree	Strongly agree	Agree	Unsure/neutral	Strongly agree	Unsure/neutral	Strongly agree	Agree	Strongly agree	Disagree	Agree	Strongly agree	Disagree	Strongly agree	Agree	Agree	Agree	Strongly agree	Strongly disagree	Agree
Canterbury Region	Strongly disagree	Unsure/neutral	Strongly disagree	Disagree	Disagree	Disagree	Unsure/neutral	Strongly disagree	Agree	Disagree	Agree	Agree	Agree	Disagree	Agree	Agree	Disagree	Unsure/neutral	Agree	Agree	Agree	Agree	Agree	Agree	Agree	Unsure/neutral	Agree	Unsure/neutral	Unsure/neutral	Unsure/neutral	Agree	Agree	Unsure/neutral	Agree	Agree	Agree	Unsure/neutral	Unsure/neutral	Unsure/neutral	Agree	Agree	Agree	Agree	Agree	Unsure/neutral	Agree	Agree	Disagree	Agree
Otago Region	Strongly disagree	Strongly disagree	Disagree	Strongly agree	Strongly disagree	Unsure/neutral	Unsure/neutral	Strongly disagree	Strongly disagree	Strongly agree	Strongly disagree	Unsure/neutral	Unsure/neutral	Strongly disagree	Strongly agree	Strongly agree	Strongly agree	Strongly agree	Strongly agree	Strongly agree	Strongly agree	Strongly agree	Strongly agree	Strongly agree	Strongly agree	Strongly disagree	Unsure/neutral	Strongly disagree	Strongly agree	Strongly disagree	Agree	Agree	Strongly disagree	Strongly agree	Strongly agree	Strongly disagree	Strongly disagree	Strongly disagree	Strongly disagree	Strongly disagree	Strongly disagree	Strongly agree	Unsure/neutral	Strongly disagree	Strongly disagree	Strongly disagree	Strongly disagree	Strongly agree	Strongly disagree
Auckland Region	Strongly disagree	Unsure/neutral	Strongly disagree	Unsure/neutral	Disagree	Disagree	Strongly agree	Disagree	Agree	Strongly disagree	Strongly agree	Strongly agree	Strongly agree	Strongly disagree	Strongly agree	Strongly agree	Disagree	Disagree	Strongly agree	Strongly agree	Strongly agree	Strongly agree	Strongly agree	Strongly agree	Strongly agree	Agree	Strongly agree	Agree	Agree	Agree	Strongly agree	Disagree	Agree	Strongly agree	Disagree	Agree	Disagree	Agree	Agree	Strongly agree	Agree	Disagree	Agree	Strongly agree	Strongly disagree	Strongly agree	Strongly agree	Strongly disagree	Strongly agree
Canterbury Region	Strongly disagree	Unsure/neutral	Strongly disagree	Strongly disagree	Disagree	Strongly disagree	Agree	Strongly disagree	Unsure/neutral	Disagree	Agree	Agree	Strongly disagree	Disagree	Strongly agree	Agree	Disagree	Disagree	Agree	Strongly agree	Agree	Agree	Agree	Agree	Agree	Unsure/neutral	Agree	Unsure/neutral	Disagree	Disagree	Strongly agree	Strongly agree	Disagree	Unsure/neutral	Agree	Unsure/neutral	Disagree	Disagree	Disagree	Disagree	Strongly agree	Disagree	Unsure/neutral	Agree	Disagree	Agree	Agree	Strongly disagree	Agree
Auckland Region	Disagree	Disagree	Disagree	Disagree	Unsure/neutral	Disagree	Agree	Unsure/neutral	Unsure/neutral	Disagree	Strongly agree	Agree	Agree	Disagree	Agree	Agree	Unsure/neutral	Agree	Agree	Strongly agree	Strongly agree	Agree	Agree	Agree	Agree	Unsure/neutral	Agree	Agree	Strongly agree	Unsure/neutral	Agree	Unsure/neutral	Unsure/neutral	Agree	Unsure/neutral	Unsure/neutral	Unsure/neutral	Unsure/neutral	Unsure/neutral	Unsure/neutral	Unsure/neutral	Unsure/neutral	Unsure/neutral	Unsure/neutral	Agree	Unsure/neutral	Unsure/neutral	Unsure/neutral	Unsure/neutral
Hawke's Bay Region	Strongly disagree	Disagree	Strongly disagree	Strongly agree	Unsure/neutral	Disagree	Strongly agree	Strongly disagree	Agree	Agree	Disagree	Strongly agree	Strongly agree	Strongly disagree	Disagree	Unsure/neutral	Strongly agree	Agree	Strongly agree	Unsure/neutral	Agree	Agree	Agree	Agree	Disagree	Unsure/neutral	Agree	Unsure/neutral	Unsure/neutral	Unsure/neutral	Unsure/neutral	Agree	Unsure/neutral	Unsure/neutral	Agree	Agree	Unsure/neutral	Agree	Unsure/neutral	Unsure/neutral	Agree	Unsure/neutral	Unsure/neutral	Agree	Unsure/neutral	Strongly agree	Strongly agree	Strongly disagree	Strongly agree
Auckland Region	Strongly disagree	Disagree	Strongly disagree	Disagree	Disagree	Disagree	Strongly agree	Disagree	Agree	Disagree	Unsure/neutral	Agree	Agree	Strongly disagree	Agree	Agree	Disagree	Unsure/neutral	Agree	Agree	Agree	Agree	Agree	Agree	Agree	Agree	Strongly agree	Agree	Agree	Agree	Agree	Agree	Agree	Strongly agree	Agree	Strongly agree	Strongly agree	Strongly agree	Agree	Strongly agree	Strongly agree	Disagree	Strongly agree	Strongly agree	Disagree	Strongly agree	Strongly agree	Strongly disagree	Strongly agree
Manawatu-Whanganui Region	Disagree	Disagree	Disagree	Strongly agree	Strongly disagree	Agree	Agree	Unsure/neutral	Unsure/neutral	Agree	Disagree	Unsure/neutral	Disagree	Strongly disagree	Disagree	Unsure/neutral	Strongly agree	Strongly agree	Strongly agree	Disagree	Strongly disagree	Strongly disagree	Strongly disagree	Strongly disagree	Strongly disagree	Strongly disagree	Disagree	Strongly disagree	Agree	Unsure/neutral	Strongly disagree	Disagree	Unsure/neutral	Strongly disagree	Unsure/neutral	Strongly disagree	Strongly disagree	Strongly disagree	Strongly disagree	Strongly disagree	Strongly disagree	Strongly disagree	Unsure/neutral	Strongly disagree	Strongly disagree	Strongly disagree	Strongly disagree	Strongly agree	Strongly disagree
Bay of Plenty Region	Strongly disagree	Strongly disagree	Strongly disagree	Strongly disagree	Strongly disagree	Strongly disagree	Strongly agree	Strongly disagree	Agree	Strongly disagree	Strongly agree	Agree	Strongly agree	Strongly disagree	Strongly agree	Strongly agree	Strongly disagree	Strongly disagree	Strongly agree	Strongly agree	Strongly agree	Agree	Strongly agree	Strongly agree	Strongly agree	Strongly agree	Strongly agree	Strongly agree	Agree	Strongly agree	Strongly agree	Agree	Agree	Strongly agree	Disagree	Strongly agree	Strongly agree	Strongly agree	Strongly agree	Agree	Strongly agree	Disagree	Agree	Strongly agree	Strongly disagree	Strongly agree	Strongly agree	Strongly disagree	Strongly agree
Southland Region	Disagree	Disagree	Agree	Strongly agree	Disagree	Agree	Agree	Agree	Disagree	Agree	Strongly disagree	Unsure/neutral	Disagree	Strongly disagree	Disagree	Agree	Strongly agree	Agree	Strongly agree	Disagree	Unsure/neutral	Disagree	Unsure/neutral	Unsure/neutral	Disagree	Disagree	Disagree	Strongly disagree	Agree	Agree	Disagree	Agree	Agree	Disagree	Agree	Strongly disagree	Strongly disagree	Strongly disagree	Strongly disagree	Strongly disagree	Strongly disagree	Agree	Strongly disagree	Strongly disagree	Agree	Disagree	Disagree	Agree	Disagree
Auckland Region	Disagree	Disagree	Strongly disagree	Disagree	Disagree	Disagree	Strongly agree	Disagree	Agree	Strongly disagree	Agree	Agree	Agree	Disagree	Strongly agree	Agree	Disagree	Disagree	Disagree	Agree	Agree	Agree	Agree	Agree	Agree	Agree	Agree	Unsure/neutral	Agree	Unsure/neutral	Agree	Agree	Agree	Agree	Agree	Unsure/neutral	Agree	Unsure/neutral	Agree	Unsure/neutral	Agree	Agree	Agree	Agree	Agree	Agree	Agree	Disagree	Agree
Auckland Region	Disagree	Disagree	Strongly disagree	Strongly agree	Strongly disagree	Unsure/neutral	Agree	Disagree	Disagree	Unsure/neutral	Strongly disagree	Strongly agree	Strongly agree	Disagree	Disagree	Agree	Unsure/neutral	Unsure/neutral	Agree	Agree	Unsure/neutral	Agree	Unsure/neutral	Agree	Unsure/neutral	Disagree	Unsure/neutral	Disagree	Disagree	Unsure/neutral	Disagree	Disagree	Unsure/neutral	Disagree	Disagree	Disagree	Strongly disagree	Strongly disagree	Strongly disagree	Unsure/neutral	Disagree	Disagree	Unsure/neutral	Strongly disagree	Disagree	Disagree	Unsure/neutral	Unsure/neutral	Disagree
Wellington Region	Strongly disagree	Strongly disagree	Strongly disagree	Disagree	Disagree	Disagree	Strongly agree	Strongly disagree	Agree	Strongly disagree	Agree	Agree	Agree	Strongly disagree	Agree	Agree	Disagree	Disagree	Strongly agree	Agree	Strongly agree	Strongly agree	Strongly agree	Strongly agree	Strongly agree	Agree	Agree	Unsure/neutral	Unsure/neutral	Agree	Agree	Strongly agree	Agree	Agree	Agree	Agree	Unsure/neutral	Unsure/neutral	Disagree	Agree	Agree	Unsure/neutral	Agree	Agree	Disagree	Strongly agree	Strongly agree	Strongly disagree	Strongly agree
Hawke's Bay Region	Disagree	Disagree	Strongly disagree	Disagree	Disagree	Disagree	Strongly agree	Disagree	Unsure/neutral	Disagree	Agree	Agree	Agree	Disagree	Agree	Agree	Agree	Unsure/neutral	Strongly agree	Strongly agree	Strongly agree	Strongly agree	Agree	Agree	Agree	Agree	Agree	Agree	Unsure/neutral	Agree	Agree	Agree	Agree	Agree	Agree	Agree	Agree	Agree	Agree	Agree	Agree	Disagree	Agree	Agree	Disagree	Agree	Agree	Disagree	Agree
Auckland Region	Strongly disagree	Unsure/neutral	Disagree	Agree	Unsure/neutral	Disagree	Agree	Disagree	Unsure/neutral	Disagree	Agree	Agree	Unsure/neutral	Agree	Unsure/neutral	Unsure/neutral	Unsure/neutral	Unsure/neutral	Agree	Agree	Unsure/neutral	Unsure/neutral	Unsure/neutral	Unsure/neutral	Unsure/neutral	Unsure/neutral	Unsure/neutral	Agree	Unsure/neutral	Unsure/neutral	Disagree	Unsure/neutral	Unsure/neutral	Unsure/neutral	Unsure/neutral	Unsure/neutral	Unsure/neutral	Unsure/neutral	Unsure/neutral	Unsure/neutral	Unsure/neutral	Unsure/neutral	Unsure/neutral	Unsure/neutral	Agree	Unsure/neutral	Unsure/neutral	Unsure/neutral	Disagree
Auckland Region	Strongly disagree	Disagree	Strongly disagree	Disagree	Disagree	Strongly disagree	Strongly agree	Strongly disagree	Agree	Strongly disagree	Agree	Agree	Agree	Strongly disagree	Strongly agree	Strongly agree	Disagree	Disagree	Strongly agree	Strongly agree	Agree	Agree	Agree	Strongly agree	Agree	Unsure/neutral	Strongly agree	Agree	Disagree	Agree	Agree	Strongly agree	Agree	Agree	Agree	Agree	Unsure/neutral	Agree	Disagree	Strongly agree	Agree	Unsure/neutral	Agree	Strongly agree	Strongly disagree	Strongly agree	Strongly agree	Strongly disagree	Strongly agree
Auckland Region	Strongly disagree	Agree	Strongly disagree	Agree	Disagree	Disagree	Agree	Strongly disagree	Agree	Disagree	Agree	Disagree	Agree	Strongly disagree	Agree	Agree	Disagree	Disagree	Agree	Agree	Agree	Agree	Agree	Agree	Agree	Agree	Agree	Agree	Strongly agree	Unsure/neutral	Agree	Agree	Unsure/neutral	Agree	Agree	Agree	Agree	Agree	Agree	Agree	Agree	Disagree	Agree	Agree	Disagree	Agree	Agree	Disagree	Agree
Canterbury Region	Strongly disagree	Disagree	Strongly disagree	Strongly disagree	Strongly disagree	Strongly disagree	Agree	Strongly disagree	Agree	Strongly disagree	Strongly agree	Agree	Agree	Strongly disagree	Strongly agree	Agree	Strongly disagree	Disagree	Disagree	Strongly agree	Strongly agree	Strongly agree	Strongly agree	Strongly agree	Strongly agree	Unsure/neutral	Agree	Agree	Agree	Agree	Strongly agree	Agree	Agree	Agree	Agree	Agree	Agree	Agree	Agree	Agree	Strongly agree	Disagree	Agree	Agree	Disagree	Strongly agree	Strongly agree	Strongly disagree	Strongly agree
Auckland Region	Disagree	Unsure/neutral	Strongly disagree	Unsure/neutral	Unsure/neutral	Disagree	Agree	Disagree	Agree	Disagree	Agree	Unsure/neutral	Agree	Disagree	Agree	Agree	Unsure/neutral	Unsure/neutral	Unsure/neutral	Agree	Agree	Agree	Agree	Agree	Agree	Agree	Agree	Agree	Unsure/neutral	Agree	Agree	Unsure/neutral	Unsure/neutral	Agree	Disagree	Agree	Unsure/neutral	Agree	Disagree	Agree	Agree	Disagree	Agree	Agree	Disagree	Agree	Agree	Disagree	Agree
Auckland Region	Strongly disagree	Strongly disagree	Strongly disagree	Strongly disagree	Unsure/neutral	Strongly disagree	Agree	Strongly disagree	Agree	Strongly agree	Strongly agree	Agree	Strongly agree	Disagree	Strongly agree	Strongly agree	Strongly disagree	Strongly disagree	Disagree	Strongly agree	Strongly agree	Agree	Strongly agree	Strongly agree	Strongly agree	Agree	Agree	Strongly agree	Agree	Agree	Strongly agree	Agree	Agree	Strongly agree	Disagree	Agree	Agree	Strongly agree	Agree	Agree	Agree	Disagree	Agree	Agree	Strongly disagree	Strongly agree	Strongly agree	Strongly disagree	Strongly agree
Auckland Region	Disagree	Disagree	Strongly disagree	Strongly agree	Agree	Disagree	Agree	Strongly disagree	Disagree	Unsure/neutral	Unsure/neutral	Agree	Agree	Strongly disagree	Agree	Agree	Strongly agree	Agree	Strongly agree	Strongly agree	Agree	Strongly disagree	Unsure/neutral	Agree	Unsure/neutral	Disagree	Disagree	Disagree	Strongly agree	Agree	Unsure/neutral	Agree	Unsure/neutral	Disagree	Agree	Disagree	Unsure/neutral	Unsure/neutral	Disagree	Unsure/neutral	Unsure/neutral	Unsure/neutral	Agree	Agree	Unsure/neutral	Agree	Agree	Disagree	Agree
Canterbury Region	Strongly disagree	Strongly disagree	Disagree	Disagree	Strongly disagree	Strongly disagree	Strongly agree	Strongly disagree	Unsure/neutral	Disagree	Unsure/neutral	Agree	Agree	Strongly disagree	Agree	Agree	Unsure/neutral	Disagree	Unsure/neutral	Strongly agree	Agree	Agree	Agree	Agree	Agree	Agree	Agree	Unsure/neutral	Agree	Agree	Agree	Unsure/neutral	Agree	Agree	Unsure/neutral	Agree	Agree	Unsure/neutral	Agree	Agree	Agree	Unsure/neutral	Agree	Agree	Unsure/neutral	Agree	Agree	Disagree	Agree
Auckland Region	Strongly disagree	Unsure/neutral	Strongly disagree	Strongly disagree	Strongly disagree	Strongly disagree	Strongly agree	Strongly disagree	Strongly agree	Strongly disagree	Strongly agree	Strongly agree	Strongly agree	Strongly disagree	Strongly agree	Agree	Unsure/neutral	Disagree	Strongly agree	Strongly agree	Strongly agree	Strongly agree	Strongly agree	Strongly agree	Strongly agree	Strongly agree	Strongly agree	Strongly agree	Strongly agree	Strongly agree	Strongly agree	Strongly agree	Strongly agree	Strongly agree	Strongly agree	Strongly agree	Strongly agree	Strongly agree	Strongly agree	Strongly agree	Strongly agree	Strongly disagree	Strongly agree	Strongly agree	Strongly disagree	Strongly agree	Strongly agree	Strongly disagree	Strongly agree
Northland Region	Disagree	Disagree	Unsure/neutral	Unsure/neutral	Unsure/neutral	Disagree	Disagree	Unsure/neutral	Strongly agree	Unsure/neutral	Disagree	Strongly agree	Unsure/neutral	Strongly agree	Agree	Agree	Disagree	Agree	Unsure/neutral	Agree	Agree	Agree	Agree	Agree	Agree	Agree	Agree	Agree	Agree	Agree	Agree	Agree	Agree	Agree	Agree	Unsure/neutral	Agree	Unsure/neutral	Unsure/neutral	Unsure/neutral	Unsure/neutral	Unsure/neutral	Agree	Unsure/neutral	Unsure/neutral	Agree	Unsure/neutral	Agree	Unsure/neutral
Auckland Region	Unsure/neutral	Unsure/neutral	Unsure/neutral	Unsure/neutral	Unsure/neutral	Strongly agree	Unsure/neutral	Unsure/neutral	Unsure/neutral	Unsure/neutral	Unsure/neutral	Unsure/neutral	Unsure/neutral	Unsure/neutral	Agree	Unsure/neutral	Unsure/neutral	Unsure/neutral	Unsure/neutral	Unsure/neutral	Unsure/neutral	Unsure/neutral	Unsure/neutral	Unsure/neutral	Unsure/neutral	Unsure/neutral	Unsure/neutral	Unsure/neutral	Unsure/neutral	Unsure/neutral	Unsure/neutral	Unsure/neutral	Unsure/neutral	Unsure/neutral	Unsure/neutral	Unsure/neutral	Unsure/neutral	Unsure/neutral	Unsure/neutral	Unsure/neutral	Unsure/neutral	Unsure/neutral	Unsure/neutral	Unsure/neutral	Unsure/neutral	Unsure/neutral	Unsure/neutral	Unsure/neutral	Unsure/neutral
Manawatu-Whanganui Region	Unsure/neutral	Disagree	Disagree	Agree	Unsure/neutral	Unsure/neutral	Agree	Unsure/neutral	Agree	Agree	Strongly disagree	Unsure/neutral	Disagree	Unsure/neutral	Disagree	Agree	Strongly agree	Agree	Unsure/neutral	Agree	Unsure/neutral	Disagree	Disagree	Disagree	Unsure/neutral	Disagree	Disagree	Disagree	Unsure/neutral	Agree	Disagree	Unsure/neutral	Agree	Disagree	Agree	Disagree	Disagree	Strongly disagree	Agree	Disagree	Disagree	Unsure/neutral	Agree	Disagree	Disagree	Disagree	Disagree	Agree	Disagree
Waikato Region	Strongly disagree	Strongly disagree	Strongly disagree	Agree	Disagree	Strongly agree	Strongly agree	Strongly disagree	Agree	Agree	Agree	Strongly agree	Strongly agree	Strongly disagree	Agree	Agree	Agree	Disagree	Strongly agree	Agree	Agree	Agree	Agree	Agree	Agree	Unsure/neutral	Unsure/neutral	Unsure/neutral	Strongly agree	Agree	Unsure/neutral	Agree	Agree	Agree	Agree	Unsure/neutral	Agree	Agree	Agree	Agree	Strongly agree	Disagree	Agree	Strongly agree	Disagree	Agree	Agree	Strongly disagree	Agree
Taranaki Region	Strongly disagree	Strongly disagree	Strongly disagree	Strongly disagree	Strongly disagree	Strongly agree	Strongly disagree	Strongly disagree	Strongly disagree	Strongly disagree	Strongly disagree	Strongly agree	Strongly agree	Strongly disagree	Strongly disagree	Strongly disagree	Strongly disagree	Strongly disagree	Strongly disagree	Strongly agree	Strongly agree	Strongly agree	Strongly agree	Strongly agree	Strongly agree	Strongly agree	Strongly agree	Strongly agree	Strongly disagree	Strongly agree	Strongly agree	Strongly agree	Strongly agree	Strongly agree	Strongly agree	Strongly disagree	Unsure/neutral	Strongly agree	Disagree	Strongly agree	Strongly agree	Strongly disagree	Strongly agree	Strongly agree	Strongly disagree	Strongly agree	Strongly agree	Strongly disagree	Strongly agree
Auckland Region	Strongly disagree	Strongly agree	Strongly disagree	Strongly disagree	Strongly disagree	Strongly disagree	Strongly agree	Strongly disagree	Disagree	Strongly disagree	Unsure/neutral	Strongly agree	Agree	Strongly disagree	Strongly agree	Strongly agree	Strongly disagree	Strongly agree	Strongly disagree	Strongly agree	Strongly agree	Strongly agree	Strongly agree	Strongly agree	Strongly agree	Unsure/neutral	Unsure/neutral	Unsure/neutral	Unsure/neutral	Unsure/neutral	Unsure/neutral	Unsure/neutral	Unsure/neutral	Unsure/neutral	Disagree	Strongly agree	Strongly agree	Agree	Strongly agree	Strongly agree	Strongly agree	Strongly agree	Strongly agree	Strongly agree	Strongly agree	Agree	Strongly agree	Strongly agree	Strongly agree
Wellington Region	Disagree	Disagree	Disagree	Unsure/neutral	Strongly agree	Disagree	Agree	Disagree	Unsure/neutral	Unsure/neutral	Disagree	Unsure/neutral	Agree	Disagree	Agree	Agree	Unsure/neutral	Unsure/neutral	Agree	Agree	Agree	Unsure/neutral	Agree	Agree	Agree	Disagree	Unsure/neutral	Strongly disagree	Agree	Disagree	Unsure/neutral	Agree	Disagree	Unsure/neutral	Agree	Unsure/neutral	Disagree	Strongly disagree	Disagree	Disagree	Unsure/neutral	Agree	Disagree	Unsure/neutral	Unsure/neutral	Unsure/neutral	Agree	Disagree	Agree
Auckland Region	Unsure/neutral	Unsure/neutral	Unsure/neutral	Unsure/neutral	Unsure/neutral	Unsure/neutral	Unsure/neutral	Unsure/neutral	Unsure/neutral	Unsure/neutral	Unsure/neutral	Unsure/neutral	Unsure/neutral	Unsure/neutral	Agree	Agree	Agree	Agree	Agree	Agree	Strongly agree	Strongly agree	Agree	Unsure/neutral	Unsure/neutral	Unsure/neutral	Agree	Unsure/neutral	Agree	Unsure/neutral	Agree	Unsure/neutral	Unsure/neutral	Strongly agree	Agree	Agree	Unsure/neutral	Unsure/neutral	Unsure/neutral	Agree	Unsure/neutral	Unsure/neutral	Agree	Agree	Unsure/neutral	Unsure/neutral	Unsure/neutral	Unsure/neutral	Agree
Auckland Region	Disagree	Disagree	Strongly disagree	Agree	Disagree	Strongly disagree	Strongly agree	Strongly disagree	Unsure/neutral	Disagree	Unsure/neutral	Agree	Strongly agree	Disagree	Agree	Strongly agree	Agree	Agree	Agree	Agree	Strongly agree	Strongly agree	Strongly agree	Strongly agree	Strongly agree	Agree	Agree	Unsure/neutral	Agree	Agree	Agree	Agree	Strongly agree	Agree	Agree	Strongly agree	Agree	Agree	Unsure/neutral	Agree	Agree	Strongly disagree	Agree	Strongly agree	Strongly disagree	Agree	Strongly agree	Strongly disagree	Strongly agree
West Coast Region	Strongly disagree	Disagree	Strongly disagree	Unsure/neutral	Strongly disagree	Disagree	Strongly agree	Unsure/neutral	Strongly agree	Unsure/neutral	Unsure/neutral	Unsure/neutral	Agree	Strongly disagree	Strongly agree	Agree	Disagree	Disagree	Disagree	Strongly agree	Strongly agree	Strongly agree	Strongly agree	Strongly agree	Strongly agree	Disagree	Agree	Unsure/neutral	Agree	Disagree	Agree	Agree	Disagree	Agree	Agree	Disagree	Unsure/neutral	Unsure/neutral	Unsure/neutral	Disagree	Agree	Strongly disagree	Disagree	Agree	Strongly disagree	Unsure/neutral	Agree	Disagree	Agree
Auckland Region	Strongly disagree	Disagree	Strongly disagree	Unsure/neutral	Strongly disagree	Disagree	Agree	Strongly disagree	Agree	Disagree	Unsure/neutral	Agree	Agree	Strongly disagree	Agree	Unsure/neutral	Unsure/neutral	Unsure/neutral	Agree	Unsure/neutral	Agree	Agree	Agree	Unsure/neutral	Agree	Agree	Unsure/neutral	Unsure/neutral	Unsure/neutral	Agree	Unsure/neutral	Agree	Unsure/neutral	Unsure/neutral	Agree	Agree	Unsure/neutral	Agree	Unsure/neutral	Agree	Agree	Disagree	Agree	Agree	Disagree	Strongly agree	Strongly agree	Disagree	Strongly agree
Wellington Region	Strongly disagree	Disagree	Strongly disagree	Disagree	Disagree	Disagree	Agree	Disagree	Agree	Disagree	Strongly agree	Unsure/neutral	Strongly agree	Strongly disagree	Strongly agree	Strongly agree	Unsure/neutral	Unsure/neutral	Strongly agree	Agree	Agree	Disagree	Strongly agree	Agree	Agree	Agree	Unsure/neutral	Agree	Agree	Agree	Agree	Agree	Unsure/neutral	Agree	Agree	Agree	Unsure/neutral	Agree	Agree	Agree	Agree	Agree	Agree	Agree	Agree	Agree	Agree	Disagree	Agree
Canterbury Region	Strongly disagree	Disagree	Strongly disagree	Unsure/neutral	Strongly disagree	Disagree	Strongly agree	Disagree	Strongly agree	Strongly disagree	Agree	Strongly agree	Strongly agree	Strongly disagree	Strongly agree	Strongly agree	Agree	Disagree	Strongly disagree	Strongly agree	Strongly agree	Strongly agree	Strongly agree	Strongly agree	Strongly agree	Strongly agree	Strongly agree	Strongly agree	Strongly agree	Strongly agree	Strongly agree	Disagree	Strongly agree	Strongly agree	Disagree	Strongly agree	Strongly agree	Strongly agree	Strongly agree	Strongly agree	Strongly agree	Strongly disagree	Strongly agree	Strongly agree	Strongly disagree	Strongly agree	Strongly agree	Strongly disagree	Strongly agree
Auckland Region	Strongly disagree	Disagree	Strongly disagree	Agree	Disagree	Disagree	Strongly agree	Strongly disagree	Disagree	Strongly disagree	Agree	Agree	Strongly agree	Disagree	Unsure/neutral	Agree	Agree	Agree	Strongly agree	Unsure/neutral	Unsure/neutral	Unsure/neutral	Agree	Agree	Unsure/neutral	Disagree	Disagree	Strongly disagree	Agree	Unsure/neutral	Disagree	Strongly agree	Agree	Disagree	Agree	Unsure/neutral	Disagree	Agree	Disagree	Agree	Agree	Agree	Disagree	Agree	Disagree	Agree	Agree	Disagree	Agree
Auckland Region	Disagree	Strongly disagree	Strongly disagree	Strongly disagree	Strongly disagree	Disagree	Agree	Strongly disagree	Agree	Disagree	Strongly agree	Agree	Agree	Disagree	Strongly agree	Agree	Strongly disagree	Disagree	Disagree	Strongly agree	Strongly agree	Agree	Agree	Agree	Agree	Agree	Agree	Agree	Strongly agree	Agree	Agree	Agree	Agree	Agree	Disagree	Agree	Agree	Strongly agree	Agree	Agree	Agree	Disagree	Agree	Strongly agree	Disagree	Agree	Agree	Strongly disagree	Agree
Otago Region	Strongly disagree	Agree	Disagree	Agree	Disagree	Disagree	Agree	Disagree	Disagree	Disagree	Disagree	Disagree	Unsure/neutral	Disagree	Agree	Agree	Agree	Disagree	Agree	Strongly agree	Agree	Agree	Agree	Agree	Disagree	Disagree	Agree	Disagree	Agree	Unsure/neutral	Agree	Agree	Unsure/neutral	Unsure/neutral	Agree	Strongly disagree	Disagree	Disagree	Disagree	Disagree	Strongly disagree	Strongly disagree	Strongly disagree	Disagree	Disagree	Disagree	Agree	Unsure/neutral	Disagree
Southland Region	Disagree	Unsure/neutral	Disagree	Unsure/neutral	Disagree	Disagree	Unsure/neutral	Disagree	Agree	Disagree	Unsure/neutral	Disagree	Disagree	Disagree	Agree	Agree	Agree	Disagree	Disagree	Agree	Agree	Agree	Agree	Agree	Unsure/neutral	Unsure/neutral	Unsure/neutral	Unsure/neutral	Agree	Unsure/neutral	Agree	Agree	Unsure/neutral	Unsure/neutral	Agree	Disagree	Unsure/neutral	Disagree	Unsure/neutral	Disagree	Disagree	Agree	Disagree	Unsure/neutral	Unsure/neutral	Disagree	Disagree	Agree	Disagree
Auckland Region	Strongly disagree	Disagree	Strongly disagree	Strongly disagree	Strongly disagree	Disagree	Strongly agree	Strongly disagree	Disagree	Strongly agree	Agree	Unsure/neutral	Disagree	Strongly disagree	Agree	Agree	Disagree	Disagree	Agree	Strongly agree	Strongly agree	Strongly agree	Strongly agree	Strongly agree	Strongly agree	Unsure/neutral	Agree	Disagree	Unsure/neutral	Agree	Agree	Strongly agree	Agree	Agree	Agree	Unsure/neutral	Unsure/neutral	Unsure/neutral	Unsure/neutral	Agree	Strongly agree	Disagree	Agree	Agree	Disagree	Strongly agree	Strongly agree	Strongly disagree	Strongly agree
Canterbury Region	Strongly disagree	Agree	Strongly disagree	Strongly agree	Disagree	Strongly disagree	Agree	Strongly disagree	Agree	Disagree	Strongly agree	Agree	Agree	Disagree	Agree	Agree	Strongly agree	Unsure/neutral	Agree	Agree	Strongly agree	Agree	Strongly agree	Strongly agree	Agree	Agree	Agree	Agree	Unsure/neutral	Agree	Agree	Agree	Agree	Agree	Agree	Unsure/neutral	Unsure/neutral	Unsure/neutral	Unsure/neutral	Unsure/neutral	Unsure/neutral	Unsure/neutral	Unsure/neutral	Unsure/neutral	Unsure/neutral	Unsure/neutral	Unsure/neutral	Unsure/neutral	Unsure/neutral
Auckland Region	Disagree	Unsure/neutral	Unsure/neutral	Disagree	Unsure/neutral	Unsure/neutral	Disagree	Strongly disagree	Agree	Disagree	Disagree	Unsure/neutral	Agree	Unsure/neutral	Agree	Unsure/neutral	Unsure/neutral	Disagree	Unsure/neutral	Agree	Agree	Agree	Agree	Agree	Unsure/neutral	Agree	Agree	Unsure/neutral	Agree	Unsure/neutral	Agree	Unsure/neutral	Agree	Agree	Unsure/neutral	Agree	Agree	Agree	Agree	Agree	Agree	Agree	Agree	Agree	Agree	Agree	Agree	Agree	Agree
Waikato Region	Strongly disagree	Unsure/neutral	Disagree	Strongly agree	Strongly disagree	Unsure/neutral	Agree	Disagree	Unsure/neutral	Agree	Disagree	Strongly disagree	Strongly disagree	Strongly disagree	Disagree	Unsure/neutral	Unsure/neutral	Unsure/neutral	Agree	Disagree	Disagree	Disagree	Disagree	Disagree	Disagree	Strongly disagree	Disagree	Strongly disagree	Disagree	Strongly disagree	Strongly disagree	Disagree	Strongly disagree	Strongly disagree	Disagree	Strongly disagree	Strongly disagree	Strongly disagree	Strongly disagree	Strongly disagree	Strongly disagree	Strongly disagree	Strongly disagree	Strongly disagree	Strongly disagree	Strongly disagree	Strongly disagree	Disagree	Strongly disagree
Canterbury Region	Disagree	Strongly disagree	Strongly disagree	Disagree	Strongly disagree	Disagree	Agree	Disagree	Agree	Disagree	Agree	Agree	Unsure/neutral	Strongly disagree	Strongly agree	Agree	Disagree	Disagree	Strongly agree	Strongly agree	Strongly agree	Strongly agree	Strongly agree	Strongly agree	Agree	Agree	Agree	Agree	Unsure/neutral	Agree	Strongly agree	Disagree	Agree	Agree	Unsure/neutral	Agree	Unsure/neutral	Agree	Unsure/neutral	Agree	Agree	Disagree	Agree	Agree	Disagree	Agree	Agree	Disagree	Agree
Tasman/ Nelson Region	Disagree	Disagree	Unsure/neutral	Agree	Disagree	Unsure/neutral	Agree	Disagree	Unsure/neutral	Unsure/neutral	Unsure/neutral	Disagree	Unsure/neutral	Strongly disagree	Agree	Unsure/neutral	Agree	Agree	Agree	Agree	Unsure/neutral	Unsure/neutral	Unsure/neutral	Unsure/neutral	Unsure/neutral	Unsure/neutral	Disagree	Disagree	Agree	Unsure/neutral	Agree	Agree	Agree	Unsure/neutral	Agree	Unsure/neutral	Unsure/neutral	Unsure/neutral	Unsure/neutral	Disagree	Unsure/neutral	Disagree	Agree	Unsure/neutral	Agree	Unsure/neutral	Unsure/neutral	Unsure/neutral	Unsure/neutral
Canterbury Region	Strongly disagree	Strongly disagree	Strongly disagree	Disagree	Strongly disagree	Strongly disagree	Strongly agree	Strongly disagree	Disagree	Strongly disagree	Agree	Strongly agree	Agree	Strongly disagree	Agree	Agree	Disagree	Disagree	Agree	Agree	Agree	Agree	Agree	Agree	Agree	Unsure/neutral	Agree	Unsure/neutral	Unsure/neutral	Agree	Agree	Strongly agree	Agree	Agree	Strongly agree	Unsure/neutral	Unsure/neutral	Unsure/neutral	Unsure/neutral	Agree	Agree	Disagree	Agree	Unsure/neutral	Disagree	Agree	Agree	Strongly disagree	Agree
Wellington Region	Strongly disagree	Strongly disagree	Strongly disagree	Strongly disagree	Strongly disagree	Strongly disagree	Strongly agree	Strongly disagree	Agree	Strongly disagree	Strongly agree	Agree	Strongly agree	Strongly disagree	Strongly agree	Strongly agree	Strongly disagree	Strongly disagree	Disagree	Strongly agree	Strongly agree	Strongly agree	Strongly agree	Strongly agree	Strongly agree	Strongly agree	Strongly agree	Strongly agree	Agree	Strongly agree	Strongly agree	Strongly agree	Strongly agree	Strongly agree	Strongly agree	Strongly agree	Strongly agree	Strongly agree	Strongly agree	Strongly agree	Strongly agree	Strongly agree	Strongly agree	Strongly agree	Strongly disagree	Strongly agree	Strongly agree	Strongly agree	Strongly agree
Auckland Region	Strongly disagree	Strongly disagree	Strongly disagree	Strongly disagree	Strongly disagree	Strongly disagree	Unsure/neutral	Strongly disagree	Unsure/neutral	Strongly disagree	Agree	Agree	Agree	Strongly disagree	Strongly agree	Agree	Disagree	Strongly disagree	Agree	Strongly agree	Strongly agree	Strongly agree	Strongly agree	Strongly agree	Strongly agree	Agree	Strongly agree	Agree	Strongly agree	Agree	Agree	Strongly agree	Agree	Agree	Strongly agree	Agree	Agree	Strongly agree	Unsure/neutral	Strongly agree	Strongly agree	Disagree	Agree	Strongly agree	Disagree	Strongly agree	Strongly agree	Strongly disagree	Strongly agree
Auckland Region	Strongly disagree	Strongly agree	Unsure/neutral	Agree	Disagree	Strongly disagree	Strongly agree	Strongly disagree	Unsure/neutral	Unsure/neutral	Agree	Agree	Agree	Strongly disagree	Strongly agree	Agree	Disagree	Agree	Unsure/neutral	Strongly agree	Strongly agree	Agree	Agree	Strongly agree	Agree	Agree	Strongly agree	Agree	Strongly agree	Unsure/neutral	Agree	Agree	Unsure/neutral	Agree	Strongly agree	Strongly agree	Strongly agree	Agree	Strongly agree	Agree	Strongly agree	Agree	Unsure/neutral	Strongly agree	Agree	Agree	Agree	Disagree	Agree
Auckland Region	Strongly disagree	Disagree	Strongly disagree	Strongly disagree	Disagree	Strongly disagree	Strongly agree	Strongly disagree	Agree	Strongly disagree	Agree	Unsure/neutral	Unsure/neutral	Disagree	Strongly agree	Agree	Strongly disagree	Unsure/neutral	Unsure/neutral	Agree	Strongly agree	Strongly agree	Strongly agree	Strongly agree	Strongly agree	Agree	Agree	Agree	Agree	Agree	Agree	Strongly agree	Agree	Agree	Agree	Unsure/neutral	Agree	Agree	Agree	Agree	Agree	Disagree	Agree	Agree	Disagree	Strongly agree	Strongly agree	Strongly disagree	Agree
Auckland Region	Strongly disagree	Strongly agree	Agree	Agree	Unsure/neutral	Agree	Strongly agree	Disagree	Strongly agree	Disagree	Agree	Strongly disagree	Agree	Strongly disagree	Agree	Agree	Agree	Strongly agree	Strongly agree	Strongly disagree	Unsure/neutral	Agree	Agree	Agree	Agree	Agree	Agree	Agree	Strongly agree	Agree	Agree	Agree	Agree	Agree	Agree	Agree	Agree	Agree	Agree	Agree	Agree	Agree	Agree	Agree	Agree	Agree	Agree	Agree	Agree
Southland Region	Strongly disagree	Unsure/neutral	Strongly disagree	Unsure/neutral	Disagree	Agree	Agree	Disagree	Unsure/neutral	Unsure/neutral	Unsure/neutral	Strongly agree	Strongly agree	Disagree	Strongly agree	Strongly agree	Strongly disagree	Disagree	Agree	Strongly agree	Strongly agree	Agree	Agree	Strongly agree	Agree	Unsure/neutral	Agree	Disagree	Agree	Strongly agree	Unsure/neutral	Agree	Agree	Unsure/neutral	Agree	Unsure/neutral	Agree	Unsure/neutral	Agree	Agree	Unsure/neutral	Agree	Strongly agree	Unsure/neutral	Agree	Agree	Agree	Disagree	Unsure/neutral
Otago Region	Strongly disagree	Strongly disagree	Strongly disagree	Strongly disagree	Strongly agree	Strongly disagree	Strongly agree	Strongly disagree	Agree	Strongly disagree	Strongly agree	Unsure/neutral	Unsure/neutral	Strongly disagree	Strongly agree	Strongly agree	Strongly disagree	Strongly disagree	Strongly agree	Strongly agree	Strongly agree	Strongly agree	Strongly agree	Strongly agree	Strongly agree	Strongly agree	Strongly agree	Strongly agree	Strongly agree	Strongly agree	Strongly agree	Strongly agree	Strongly agree	Strongly agree	Strongly agree	Agree	Strongly agree	Strongly agree	Agree	Strongly agree	Strongly agree	Strongly disagree	Strongly agree	Strongly agree	Strongly disagree	Strongly agree	Strongly agree	Strongly disagree	Strongly agree
Northland Region	Strongly disagree	Strongly disagree	Strongly disagree	Disagree	Strongly disagree	Strongly disagree	Strongly agree	Strongly disagree	Agree	Strongly disagree	Disagree	Strongly agree	Strongly agree	Strongly disagree	Disagree	Disagree	Disagree	Agree	Strongly agree	Disagree	Disagree	Unsure/neutral	Agree	Agree	Agree	Disagree	Disagree	Disagree	Agree	Strongly disagree	Unsure/neutral	Agree	Disagree	Disagree	Agree	Unsure/neutral	Unsure/neutral	Unsure/neutral	Unsure/neutral	Disagree	Unsure/neutral	Agree	Disagree	Unsure/neutral	Agree	Agree	Unsure/neutral	Unsure/neutral	Unsure/neutral
Wellington Region	Disagree	Unsure/neutral	Strongly disagree	Agree	Unsure/neutral	Disagree	Agree	Unsure/neutral	Agree	Unsure/neutral	Strongly agree	Agree	Unsure/neutral	Unsure/neutral	Strongly agree	Agree	Disagree	Strongly disagree	Strongly disagree	Strongly agree	Strongly agree	Unsure/neutral	Strongly agree	Strongly agree	Agree	Unsure/neutral	Strongly agree	Agree	Unsure/neutral	Agree	Strongly agree	Unsure/neutral	Agree	Agree	Disagree	Agree	Unsure/neutral	Agree	Agree	Agree	Agree	Disagree	Unsure/neutral	Agree	Disagree	Agree	Strongly agree	Strongly disagree	Strongly agree
Manawatu-Whanganui Region	Strongly agree	Agree	Agree	Agree	Strongly agree	Strongly agree	Strongly agree	Strongly agree	Strongly agree	Strongly agree	Agree	Agree	Strongly agree	Agree	Strongly agree	Agree	Agree	Agree	Strongly agree	Strongly agree	Agree	Agree	Agree	Agree	Agree	Agree	Agree	Unsure/neutral	Agree	Agree	Agree	Unsure/neutral	Unsure/neutral	Agree	Agree	Agree	Unsure/neutral	Agree	Agree	Unsure/neutral	Unsure/neutral	Agree	Agree	Agree	Agree	Agree	Agree	Agree	Agree
Auckland Region	Strongly disagree	Strongly disagree	Strongly disagree	Disagree	Strongly disagree	Strongly disagree	Strongly agree	Disagree	Strongly disagree	Disagree	Agree	Agree	Agree	Strongly disagree	Agree	Agree	Disagree	Disagree	Agree	Agree	Agree	Agree	Agree	Agree	Agree	Agree	Agree	Unsure/neutral	Disagree	Unsure/neutral	Agree	Strongly agree	Agree	Agree	Strongly agree	Disagree	Agree	Disagree	Disagree	Unsure/neutral	Agree	Strongly disagree	Agree	Agree	Strongly disagree	Agree	Agree	Strongly disagree	Agree
Waikato Region	Strongly disagree	Unsure/neutral	Strongly disagree	Agree	Disagree	Agree	Strongly agree	Strongly disagree	Disagree	Disagree	Disagree	Agree	Agree	Disagree	Agree	Agree	Agree	Disagree	Agree	Agree	Unsure/neutral	Agree	Agree	Agree	Disagree	Disagree	Disagree	Disagree	Agree	Unsure/neutral	Agree	Strongly agree	Strongly agree	Agree	Strongly agree	Disagree	Disagree	Strongly disagree	Disagree	Unsure/neutral	Unsure/neutral	Agree	Agree	Disagree	Agree	Disagree	Disagree	Unsure/neutral	Agree
Wellington Region	Strongly disagree	Unsure/neutral	Strongly agree	Disagree	Strongly agree	Unsure/neutral	Strongly agree	Strongly disagree	Strongly agree	Strongly agree	Strongly agree	Strongly agree	Unsure/neutral	Strongly disagree	Unsure/neutral	Unsure/neutral	Unsure/neutral	Unsure/neutral	Unsure/neutral	Unsure/neutral	Unsure/neutral	Unsure/neutral	Unsure/neutral	Unsure/neutral	Unsure/neutral	Unsure/neutral	Unsure/neutral	Unsure/neutral	Unsure/neutral	Unsure/neutral	Unsure/neutral	Unsure/neutral	Unsure/neutral	Unsure/neutral	Unsure/neutral	Unsure/neutral	Unsure/neutral	Unsure/neutral	Unsure/neutral	Agree	Unsure/neutral	Unsure/neutral	Unsure/neutral	Unsure/neutral	Unsure/neutral	Unsure/neutral	Unsure/neutral	Unsure/neutral	Unsure/neutral
Auckland Region	Strongly agree	Agree	Agree	Agree	Strongly agree	Strongly agree	Agree	Agree	Agree	Agree	Agree	Strongly agree	Agree	Agree	Agree	Agree	Agree	Strongly agree	Agree	Agree	Agree	Agree	Agree	Agree	Agree	Agree	Agree	Agree	Agree	Agree	Agree	Agree	Agree	Agree	Agree	Strongly agree	Agree	Agree	Agree	Agree	Agree	Agree	Agree	Agree	Agree	Agree	Agree	Strongly agree	Agree
Gisborne Region	Strongly disagree	Disagree	Strongly disagree	Disagree	Disagree	Disagree	Strongly agree	Strongly disagree	Agree	Disagree	Strongly agree	Unsure/neutral	Unsure/neutral	Disagree	Agree	Disagree	Disagree	Disagree	Agree	Agree	Agree	Agree	Agree	Agree	Agree	Unsure/neutral	Agree	Unsure/neutral	Strongly agree	Agree	Strongly agree	Disagree	Agree	Strongly agree	Disagree	Agree	Agree	Unsure/neutral	Agree	Agree	Agree	Disagree	Agree	Agree	Disagree	Agree	Agree	Disagree	Agree
Otago Region	Strongly disagree	Strongly disagree	Strongly disagree	Disagree	Disagree	Disagree	Agree	Strongly disagree	Agree	Disagree	Strongly agree	Agree	Agree	Strongly disagree	Agree	Agree	Unsure/neutral	Strongly disagree	Disagree	Strongly agree	Agree	Agree	Agree	Agree	Agree	Agree	Agree	Unsure/neutral	Strongly disagree	Agree	Unsure/neutral	Agree	Agree	Unsure/neutral	Agree	Strongly disagree	Disagree	Strongly disagree	Unsure/neutral	Strongly disagree	Strongly disagree	Agree	Strongly disagree	Strongly disagree	Agree	Strongly disagree	Disagree	Agree	Strongly disagree
Wellington Region	Strongly disagree	Disagree	Strongly disagree	Strongly disagree	Strongly disagree	Strongly disagree	Strongly agree	Strongly disagree	Agree	Strongly disagree	Agree	Strongly agree	Strongly agree	Strongly disagree	Agree	Agree	Disagree	Strongly disagree	Unsure/neutral	Strongly agree	Strongly agree	Strongly agree	Strongly agree	Strongly agree	Strongly agree	Agree	Strongly agree	Strongly agree	Agree	Strongly agree	Strongly agree	Strongly agree	Strongly agree	Strongly agree	Strongly agree	Unsure/neutral	Agree	Agree	Unsure/neutral	Agree	Agree	Disagree	Strongly agree	Agree	Disagree	Strongly agree	Strongly agree	Strongly disagree	Strongly agree
Auckland Region	Strongly disagree	Unsure/neutral	Strongly agree	Unsure/neutral	Strongly disagree	Strongly agree	Strongly agree	Disagree	Agree	Disagree	Strongly agree	Agree	Strongly agree	Strongly disagree	Agree	Agree	Agree	Agree	Agree	Agree	Strongly agree	Agree	Strongly agree	Strongly agree	Strongly agree	Strongly agree	Strongly agree	Strongly agree	Strongly agree	Strongly agree	Strongly agree	Strongly agree	Strongly agree	Strongly agree	Strongly agree	Strongly agree	Strongly agree	Strongly agree	Strongly agree	Strongly agree	Strongly agree	Strongly agree	Strongly agree	Strongly agree	Strongly agree	Strongly agree	Strongly agree	Strongly agree	Strongly agree
Southland Region	Strongly disagree	Unsure/neutral	Unsure/neutral	Agree	Strongly disagree	Agree	Strongly agree	Disagree	Disagree	Unsure/neutral	Unsure/neutral	Unsure/neutral	Unsure/neutral	Disagree	Unsure/neutral	Agree	Agree	Unsure/neutral	Strongly agree	Agree	Unsure/neutral	Agree	Disagree	Agree	Disagree	Disagree	Disagree	Disagree	Unsure/neutral	Unsure/neutral	Unsure/neutral	Strongly agree	Strongly disagree	Disagree	Disagree	Disagree	Unsure/neutral	Disagree	Unsure/neutral	Disagree	Disagree	Unsure/neutral	Strongly agree	Disagree	Agree	Disagree	Disagree	Disagree	Disagree
Otago Region	Strongly disagree	Disagree	Strongly disagree	Strongly disagree	Strongly disagree	Disagree	Strongly agree	Strongly disagree	Unsure/neutral	Disagree	Strongly agree	Strongly agree	Agree	Strongly disagree	Strongly agree	Strongly agree	Strongly agree	Disagree	Agree	Strongly agree	Strongly agree	Strongly agree	Strongly agree	Strongly agree	Strongly agree	Strongly agree	Strongly agree	Strongly agree	Unsure/neutral	Agree	Strongly agree	Disagree	Strongly agree	Strongly agree	Disagree	Agree	Agree	Agree	Unsure/neutral	Agree	Agree	Disagree	Agree	Agree	Disagree	Strongly agree	Strongly agree	Strongly disagree	Strongly agree
Auckland Region	Strongly disagree	Strongly disagree	Strongly disagree	Strongly disagree	Strongly disagree	Strongly disagree	Agree	Strongly disagree	Agree	Strongly disagree	Strongly agree	Agree	Unsure/neutral	Strongly disagree	Strongly agree	Agree	Strongly disagree	Strongly disagree	Strongly disagree	Strongly agree	Strongly agree	Strongly agree	Strongly agree	Strongly agree	Strongly agree	Strongly agree	Strongly agree	Strongly agree	Strongly disagree	Strongly agree	Strongly agree	Strongly agree	Strongly agree	Strongly agree	Strongly agree	Strongly agree	Strongly agree	Strongly agree	Unsure/neutral	Strongly agree	Strongly agree	Strongly agree	Strongly agree	Strongly agree	Strongly agree	Strongly agree	Strongly agree	Strongly disagree	Strongly agree
Auckland Region	Strongly disagree	Disagree	Strongly disagree	Unsure/neutral	Disagree	Strongly disagree	Strongly agree	Strongly disagree	Agree	Disagree	Unsure/neutral	Strongly disagree	Disagree	Strongly disagree	Unsure/neutral	Unsure/neutral	Agree	Strongly agree	Strongly agree	Unsure/neutral	Disagree	Unsure/neutral	Unsure/neutral	Disagree	Unsure/neutral	Disagree	Disagree	Disagree	Disagree	Strongly disagree	Disagree	Agree	Disagree	Disagree	Agree	Agree	Strongly disagree	Disagree	Disagree	Strongly disagree	Unsure/neutral	Disagree	Disagree	Unsure/neutral	Agree	Unsure/neutral	Unsure/neutral	Unsure/neutral	Disagree
Otago Region	Strongly disagree	Strongly disagree	Strongly disagree	Strongly disagree	Strongly disagree	Strongly disagree	Strongly agree	Strongly disagree	Agree	Disagree	Strongly agree	Unsure/neutral	Agree	Strongly disagree	Strongly agree	Strongly agree	Strongly disagree	Unsure/neutral	Strongly agree	Strongly agree	Strongly agree	Strongly agree	Strongly agree	Strongly agree	Strongly agree	Strongly agree	Strongly agree	Agree	Unsure/neutral	Strongly agree	Strongly agree	Strongly agree	Strongly agree	Strongly agree	Strongly agree	Agree	Agree	Agree	Unsure/neutral	Agree	Strongly agree	Unsure/neutral	Unsure/neutral	Agree	Strongly agree	Strongly agree	Strongly agree	Strongly disagree	Strongly agree
Marlborough Region	Disagree	Disagree	Disagree	Disagree	Disagree	Disagree	Agree	Disagree	Unsure/neutral	Disagree	Agree	Disagree	Agree	Disagree	Agree	Agree	Disagree	Unsure/neutral	Unsure/neutral	Agree	Agree	Unsure/neutral	Agree	Agree	Agree	Agree	Agree	Unsure/neutral	Unsure/neutral	Agree	Agree	Agree	Agree	Unsure/neutral	Agree	Agree	Agree	Agree	Agree	Agree	Agree	Disagree	Agree	Agree	Disagree	Agree	Agree	Agree	Agree
Canterbury Region	Strongly disagree	Strongly disagree	Strongly disagree	Disagree	Agree	Disagree	Agree	Strongly disagree	Agree	Disagree	Disagree	Unsure/neutral	Strongly agree	Strongly disagree	Agree	Agree	Unsure/neutral	Unsure/neutral	Strongly agree	Strongly agree	Strongly agree	Agree	Agree	Strongly agree	Agree	Agree	Agree	Unsure/neutral	Strongly agree	Agree	Unsure/neutral	Agree	Agree	Unsure/neutral	Agree	Unsure/neutral	Agree	Disagree	Agree	Agree	Agree	Agree	Agree	Unsure/neutral	Agree	Agree	Agree	Disagree	Agree
Auckland Region	Strongly disagree	Disagree	Strongly disagree	Disagree	Strongly disagree	Agree	Strongly agree	Strongly disagree	Agree	Disagree	Disagree	Agree	Strongly agree	Strongly disagree	Unsure/neutral	Agree	Unsure/neutral	Agree	Strongly agree	Unsure/neutral	Unsure/neutral	Strongly disagree	Disagree	Disagree	Strongly disagree	Strongly disagree	Agree	Unsure/neutral	Strongly agree	Unsure/neutral	Disagree	Unsure/neutral	Agree	Disagree	Unsure/neutral	Strongly disagree	Unsure/neutral	Disagree	Unsure/neutral	Agree	Agree	Disagree	Agree	Agree	Disagree	Agree	Agree	Strongly disagree	Agree
Auckland Region	Strongly disagree	Unsure/neutral	Strongly disagree	Disagree	Disagree	Unsure/neutral	Agree	Disagree	Unsure/neutral	Disagree	Agree	Unsure/neutral	Agree	Disagree	Unsure/neutral	Unsure/neutral	Disagree	Disagree	Agree	Agree	Agree	Unsure/neutral	Agree	Agree	Agree	Disagree	Agree	Unsure/neutral	Agree	Unsure/neutral	Unsure/neutral	Agree	Unsure/neutral	Unsure/neutral	Agree	Strongly disagree	Unsure/neutral	Disagree	Disagree	Unsure/neutral	Unsure/neutral	Unsure/neutral	Unsure/neutral	Unsure/neutral	Unsure/neutral	Agree	Agree	Disagree	Agree
Auckland Region	Disagree	Unsure/neutral	Disagree	Agree	Disagree	Disagree	Agree	Disagree	Unsure/neutral	Agree	Unsure/neutral	Disagree	Disagree	Unsure/neutral	Unsure/neutral	Agree	Agree	Agree	Agree	Agree	Agree	Disagree	Disagree	Agree	Disagree	Disagree	Unsure/neutral	Disagree	Disagree	Disagree	Unsure/neutral	Agree	Disagree	Unsure/neutral	Agree	Disagree	Disagree	Disagree	Disagree	Disagree	Disagree	Disagree	Disagree	Disagree	Disagree	Disagree	Disagree	Unsure/neutral	Disagree
Auckland Region	Strongly disagree	Disagree	Strongly disagree	Disagree	Strongly disagree	Strongly disagree	Strongly agree	Strongly disagree	Disagree	Strongly disagree	Agree	Agree	Agree	Strongly disagree	Agree	Agree	Unsure/neutral	Disagree	Agree	Strongly agree	Agree	Unsure/neutral	Agree	Agree	Agree	Agree	Agree	Unsure/neutral	Agree	Unsure/neutral	Agree	Agree	Unsure/neutral	Agree	Agree	Agree	Agree	Agree	Agree	Agree	Agree	Agree	Agree	Agree	Agree	Agree	Agree	Disagree	Agree
Canterbury Region	Strongly disagree	Disagree	Strongly disagree	Unsure/neutral	Disagree	Strongly disagree	Agree	Disagree	Agree	Disagree	Unsure/neutral	Strongly agree	Strongly agree	Strongly disagree	Unsure/neutral	Agree	Disagree	Unsure/neutral	Strongly agree	Unsure/neutral	Unsure/neutral	Agree	Agree	Agree	Agree	Unsure/neutral	Unsure/neutral	Disagree	Unsure/neutral	Agree	Unsure/neutral	Strongly agree	Agree	Unsure/neutral	Strongly agree	Disagree	Unsure/neutral	Disagree	Disagree	Agree	Unsure/neutral	Agree	Agree	Disagree	Agree	Unsure/neutral	Unsure/neutral	Unsure/neutral	Unsure/neutral
Waikato Region	Strongly disagree	Strongly disagree	Strongly disagree	Strongly disagree	Strongly disagree	Strongly disagree	Agree	Strongly disagree	Strongly agree	Strongly disagree	Strongly agree	Unsure/neutral	Agree	Strongly disagree	Strongly agree	Strongly agree	Disagree	Unsure/neutral	Agree	Strongly agree	Strongly agree	Strongly agree	Strongly agree	Strongly agree	Strongly agree	Agree	Agree	Agree	Unsure/neutral	Unsure/neutral	Agree	Strongly agree	Strongly agree	Strongly agree	Agree	Agree	Agree	Agree	Unsure/neutral	Unsure/neutral	Agree	Disagree	Agree	Agree	Disagree	Agree	Strongly agree	Strongly disagree	Agree
Waikato Region	Strongly disagree	Strongly disagree	Strongly disagree	Strongly disagree	Strongly disagree	Strongly disagree	Agree	Strongly disagree	Strongly agree	Strongly disagree	Strongly agree	Strongly agree	Strongly agree	Strongly disagree	Strongly agree	Agree	Strongly disagree	Disagree	Agree	Strongly agree	Strongly agree	Strongly agree	Strongly agree	Strongly agree	Strongly agree	Strongly agree	Strongly agree	Strongly agree	Agree	Strongly agree	Strongly agree	Agree	Strongly agree	Strongly agree	Agree	Strongly agree	Agree	Strongly agree	Unsure/neutral	Strongly agree	Strongly agree	Disagree	Agree	Strongly agree	Disagree	Strongly agree	Strongly agree	Strongly disagree	Strongly agree
Hawke's Bay Region	Disagree	Unsure/neutral	Disagree	Strongly agree	Disagree	Disagree	Agree	Disagree	Agree	Agree	Disagree	Unsure/neutral	Disagree	Disagree	Unsure/neutral	Disagree	Agree	Agree	Agree	Disagree	Unsure/neutral	Agree	Unsure/neutral	Agree	Unsure/neutral	Strongly disagree	Strongly disagree	Strongly disagree	Strongly agree	Strongly disagree	Strongly disagree	Disagree	Strongly disagree	Disagree	Strongly disagree	Strongly disagree	Unsure/neutral	Disagree	Strongly disagree	Strongly disagree	Unsure/neutral	Disagree	Strongly disagree	Disagree	Disagree	Unsure/neutral	Unsure/neutral	Disagree	Agree
West Coast Region	Strongly disagree	Unsure/neutral	Strongly disagree	Unsure/neutral	Strongly disagree	Disagree	Strongly agree	Strongly disagree	Agree	Unsure/neutral	Unsure/neutral	Disagree	Unsure/neutral	Strongly disagree	Unsure/neutral	Strongly agree	Strongly agree	Strongly agree	Strongly agree	Strongly agree	Disagree	Strongly disagree	Strongly disagree	Disagree	Strongly disagree	Disagree	Disagree	Disagree	Disagree	Strongly disagree	Disagree	Agree	Strongly disagree	Disagree	Disagree	Strongly disagree	Disagree	Unsure/neutral	Disagree	Strongly disagree	Disagree	Disagree	Strongly disagree	Disagree	Disagree	Unsure/neutral	Unsure/neutral	Strongly disagree	Unsure/neutral
Auckland Region	Disagree	Disagree	Strongly disagree	Unsure/neutral	Disagree	Disagree	Strongly agree	Disagree	Unsure/neutral	Disagree	Unsure/neutral	Unsure/neutral	Unsure/neutral	Strongly disagree	Disagree	Unsure/neutral	Unsure/neutral	Unsure/neutral	Agree	Agree	Agree	Agree	Agree	Unsure/neutral	Agree	Disagree	Disagree	Disagree	Unsure/neutral	Unsure/neutral	Agree	Agree	Unsure/neutral	Unsure/neutral	Unsure/neutral	Unsure/neutral	Disagree	Disagree	Unsure/neutral	Unsure/neutral	Agree	Disagree	Unsure/neutral	Unsure/neutral	Disagree	Agree	Agree	Disagree	Agree
Wellington Region	Strongly disagree	Disagree	Strongly disagree	Unsure/neutral	Strongly disagree	Disagree	Agree	Strongly disagree	Agree	Strongly disagree	Strongly disagree	Unsure/neutral	Agree	Strongly disagree	Agree	Strongly agree	Strongly disagree	Disagree	Agree	Strongly agree	Strongly agree	Agree	Strongly agree	Strongly agree	Strongly agree	Agree	Unsure/neutral	Agree	Agree	Agree	Strongly agree	Agree	Agree	Agree	Agree	Disagree	Agree	Agree	Agree	Agree	Agree	Disagree	Agree	Strongly agree	Disagree	Strongly agree	Strongly agree	Strongly disagree	Strongly agree
Canterbury Region	Strongly disagree	Unsure/neutral	Strongly disagree	Unsure/neutral	Disagree	Strongly disagree	Strongly agree	Strongly disagree	Strongly agree	Unsure/neutral	Unsure/neutral	Unsure/neutral	Strongly agree	Disagree	Strongly agree	Agree	Unsure/neutral	Disagree	Unsure/neutral	Strongly agree	Strongly agree	Strongly agree	Agree	Strongly agree	Agree	Unsure/neutral	Agree	Agree	Unsure/neutral	Unsure/neutral	Agree	Unsure/neutral	Agree	Agree	Unsure/neutral	Agree	Agree	Agree	Agree	Unsure/neutral	Agree	Disagree	Unsure/neutral	Agree	Unsure/neutral	Strongly agree	Strongly agree	Strongly disagree	Strongly agree
Auckland Region	Disagree	Unsure/neutral	Disagree	Agree	Strongly disagree	Agree	Agree	Unsure/neutral	Unsure/neutral	Unsure/neutral	Disagree	Agree	Agree	Strongly disagree	Disagree	Agree	Agree	Unsure/neutral	Agree	Disagree	Unsure/neutral	Disagree	Disagree	Disagree	Disagree	Disagree	Disagree	Disagree	Strongly agree	Agree	Disagree	Agree	Strongly agree	Disagree	Agree	Strongly disagree	Strongly disagree	Strongly disagree	Strongly disagree	Agree	Strongly disagree	Agree	Agree	Strongly disagree	Agree	Disagree	Disagree	Agree	Disagree
Northland Region	Strongly disagree	Disagree	Strongly disagree	Disagree	Strongly disagree	Strongly disagree	Agree	Strongly disagree	Unsure/neutral	Strongly disagree	Unsure/neutral	Agree	Strongly agree	Strongly disagree	Strongly agree	Unsure/neutral	Disagree	Disagree	Agree	Strongly agree	Strongly agree	Agree	Strongly agree	Strongly agree	Strongly agree	Agree	Strongly agree	Agree	Agree	Unsure/neutral	Strongly agree	Agree	Agree	Strongly agree	Strongly agree	Unsure/neutral	Unsure/neutral	Unsure/neutral	Unsure/neutral	Unsure/neutral	Agree	Unsure/neutral	Disagree	Unsure/neutral	Disagree	Agree	Agree	Strongly disagree	Agree
Auckland Region	Strongly disagree	Disagree	Strongly disagree	Disagree	Unsure/neutral	Disagree	Agree	Strongly disagree	Unsure/neutral	Unsure/neutral	Agree	Unsure/neutral	Unsure/neutral	Strongly disagree	Agree	Unsure/neutral	Unsure/neutral	Agree	Agree	Agree	Agree	Unsure/neutral	Unsure/neutral	Agree	Unsure/neutral	Agree	Unsure/neutral	Agree	Unsure/neutral	Unsure/neutral	Agree	Unsure/neutral	Unsure/neutral	Agree	Unsure/neutral	Agree	Unsure/neutral	Agree	Unsure/neutral	Disagree	Agree	Unsure/neutral	Unsure/neutral	Unsure/neutral	Unsure/neutral	Agree	Agree	Unsure/neutral	Agree
Auckland Region	Disagree	Disagree	Disagree	Unsure/neutral	Disagree	Agree	Strongly agree	Disagree	Agree	Disagree	Unsure/neutral	Unsure/neutral	Strongly agree	Disagree	Agree	Agree	Disagree	Agree	Agree	Agree	Unsure/neutral	Agree	Agree	Agree	Agree	Disagree	Disagree	Unsure/neutral	Agree	Agree	Agree	Agree	Agree	Unsure/neutral	Agree	Unsure/neutral	Agree	Unsure/neutral	Unsure/neutral	Agree	Agree	Unsure/neutral	Agree	Unsure/neutral	Disagree	Agree	Agree	Disagree	Agree
Waikato Region	Strongly disagree	Disagree	Strongly disagree	Agree	Strongly disagree	Strongly disagree	Agree	Strongly disagree	Agree	Agree	Disagree	Agree	Agree	Strongly disagree	Disagree	Disagree	Agree	Unsure/neutral	Strongly agree	Agree	Disagree	Agree	Unsure/neutral	Disagree	Disagree	Disagree	Unsure/neutral	Strongly disagree	Agree	Agree	Disagree	Agree	Agree	Disagree	Agree	Disagree	Disagree	Disagree	Disagree	Agree	Disagree	Agree	Agree	Disagree	Agree	Agree	Agree	Disagree	Agree
Canterbury Region	Strongly disagree	Strongly disagree	Strongly disagree	Disagree	Strongly disagree	Strongly disagree	Agree	Strongly disagree	Agree	Disagree	Strongly agree	Agree	Agree	Strongly disagree	Agree	Agree	Agree	Agree	Agree	Agree	Unsure/neutral	Agree	Agree	Agree	Agree	Agree	Unsure/neutral	Agree	Strongly disagree	Unsure/neutral	Agree	Agree	Unsure/neutral	Agree	Agree	Agree	Strongly agree	Unsure/neutral	Strongly disagree	Unsure/neutral	Strongly agree	Agree	Strongly disagree	Agree	Strongly disagree	Strongly agree	Strongly agree	Disagree	Agree
Auckland Region	Strongly disagree	Disagree	Strongly disagree	Strongly disagree	Disagree	Strongly disagree	Agree	Strongly disagree	Unsure/neutral	Disagree	Agree	Strongly agree	Agree	Disagree	Strongly agree	Agree	Disagree	Disagree	Agree	Strongly agree	Agree	Agree	Agree	Agree	Agree	Disagree	Agree	Agree	Strongly agree	Agree	Agree	Strongly agree	Agree	Agree	Strongly agree	Strongly agree	Agree	Agree	Agree	Agree	Strongly agree	Disagree	Strongly agree	Strongly agree	Disagree	Strongly agree	Strongly agree	Strongly agree	Agree
Auckland Region	Disagree	Disagree	Strongly disagree	Strongly disagree	Strongly disagree	Strongly disagree	Strongly agree	Disagree	Agree	Unsure/neutral	Disagree	Strongly agree	Strongly agree	Disagree	Strongly agree	Strongly agree	Strongly disagree	Strongly disagree	Disagree	Strongly agree	Strongly agree	Strongly agree	Strongly agree	Strongly agree	Strongly agree	Agree	Agree	Agree	Strongly agree	Unsure/neutral	Strongly agree	Agree	Agree	Agree	Agree	Agree	Unsure/neutral	Unsure/neutral	Unsure/neutral	Agree	Agree	Unsure/neutral	Unsure/neutral	Agree	Unsure/neutral	Agree	Strongly agree	Strongly disagree	Agree
Auckland Region	Strongly disagree	Disagree	Strongly disagree	Disagree	Unsure/neutral	Disagree	Agree	Strongly disagree	Agree	Disagree	Strongly agree	Agree	Agree	Strongly disagree	Agree	Agree	Unsure/neutral	Disagree	Agree	Agree	Agree	Agree	Strongly agree	Agree	Agree	Agree	Agree	Agree	Agree	Agree	Strongly agree	Agree	Agree	Agree	Agree	Agree	Unsure/neutral	Agree	Unsure/neutral	Agree	Agree	Disagree	Agree	Agree	Disagree	Strongly agree	Strongly agree	Strongly disagree	Strongly agree
Canterbury Region	Strongly disagree	Disagree	Strongly disagree	Disagree	Strongly disagree	Disagree	Agree	Strongly disagree	Unsure/neutral	Strongly disagree	Agree	Unsure/neutral	Disagree	Strongly disagree	Agree	Unsure/neutral	Disagree	Disagree	Agree	Agree	Agree	Agree	Agree	Agree	Agree	Agree	Agree	Agree	Unsure/neutral	Agree	Agree	Agree	Agree	Agree	Agree	Disagree	Unsure/neutral	Unsure/neutral	Unsure/neutral	Agree	Unsure/neutral	Disagree	Agree	Unsure/neutral	Unsure/neutral	Agree	Agree	Disagree	Agree
Auckland Region	Strongly disagree	Disagree	Strongly disagree	Unsure/neutral	Strongly disagree	Strongly disagree	Strongly agree	Strongly disagree	Unsure/neutral	Unsure/neutral	Disagree	Agree	Disagree	Strongly disagree	Agree	Strongly agree	Agree	Agree	Strongly agree	Strongly agree	Strongly agree	Strongly agree	Strongly agree	Strongly agree	Strongly agree	Agree	Strongly agree	Agree	Unsure/neutral	Unsure/neutral	Strongly agree	Agree	Unsure/neutral	Agree	Agree	Agree	Agree	Agree	Agree	Unsure/neutral	Strongly agree	Agree	Unsure/neutral	Strongly agree	Agree	Strongly agree	Strongly agree	Strongly disagree	Strongly agree
Auckland Region	Disagree	Disagree	Strongly disagree	Disagree	Strongly disagree	Disagree	Agree	Disagree	Unsure/neutral	Disagree	Agree	Agree	Strongly agree	Disagree	Agree	Agree	Unsure/neutral	Unsure/neutral	Agree	Strongly agree	Agree	Agree	Agree	Strongly agree	Agree	Agree	Unsure/neutral	Unsure/neutral	Agree	Agree	Unsure/neutral	Agree	Agree	Unsure/neutral	Agree	Agree	Unsure/neutral	Agree	Unsure/neutral	Unsure/neutral	Agree	Agree	Agree	Agree	Unsure/neutral	Strongly agree	Strongly agree	Disagree	Agree
Taranaki Region	Strongly disagree	Strongly disagree	Strongly disagree	Disagree	Strongly disagree	Agree	Strongly agree	Disagree	Strongly agree	Strongly disagree	Strongly agree	Strongly agree	Strongly agree	Disagree	Strongly agree	Strongly agree	Disagree	Disagree	Agree	Strongly agree	Strongly agree	Agree	Strongly agree	Strongly agree	Strongly agree	Strongly agree	Strongly agree	Agree	Strongly agree	Strongly agree	Strongly agree	Strongly agree	Strongly agree	Strongly agree	Strongly agree	Strongly agree	Strongly agree	Strongly agree	Strongly agree	Strongly agree	Strongly agree	Disagree	Strongly agree	Strongly agree	Disagree	Strongly agree	Strongly agree	Strongly disagree	Strongly agree
Canterbury Region	Disagree	Disagree	Strongly disagree	Unsure/neutral	Disagree	Disagree	Agree	Disagree	Agree	Disagree	Agree	Unsure/neutral	Agree	Disagree	Agree	Agree	Unsure/neutral	Disagree	Disagree	Strongly agree	Agree	Agree	Agree	Agree	Agree	Unsure/neutral	Agree	Disagree	Agree	Disagree	Agree	Strongly agree	Unsure/neutral	Unsure/neutral	Strongly agree	Disagree	Unsure/neutral	Disagree	Unsure/neutral	Unsure/neutral	Agree	Disagree	Disagree	Agree	Disagree	Strongly agree	Agree	Disagree	Agree
Auckland Region	Disagree	Agree	Strongly disagree	Agree	Disagree	Disagree	Strongly agree	Strongly disagree	Agree	Disagree	Unsure/neutral	Unsure/neutral	Unsure/neutral	Strongly disagree	Agree	Agree	Disagree	Unsure/neutral	Agree	Agree	Agree	Agree	Agree	Agree	Unsure/neutral	Agree	Agree	Unsure/neutral	Strongly agree	Agree	Agree	Agree	Agree	Unsure/neutral	Unsure/neutral	Unsure/neutral	Agree	Agree	Agree	Agree	Agree	Agree	Agree	Agree	Agree	Unsure/neutral	Agree	Disagree	Agree
Canterbury Region	Strongly disagree	Strongly disagree	Strongly disagree	Unsure/neutral	Unsure/neutral	Agree	Strongly agree	Disagree	Strongly agree	Disagree	Unsure/neutral	Agree	Agree	Strongly disagree	Unsure/neutral	Agree	Unsure/neutral	Agree	Agree	Agree	Agree	Agree	Agree	Agree	Agree	Disagree	Disagree	Disagree	Disagree	Unsure/neutral	Disagree	Disagree	Agree	Unsure/neutral	Disagree	Unsure/neutral	Agree	Unsure/neutral	Agree	Agree	Unsure/neutral	Disagree	Unsure/neutral	Unsure/neutral	Unsure/neutral	Agree	Disagree	Agree	Unsure/neutral
Taranaki Region	Strongly disagree	Unsure/neutral	Strongly disagree	Unsure/neutral	Unsure/neutral	Agree	Strongly agree	Unsure/neutral	Disagree	Unsure/neutral	Disagree	Agree	Agree	Strongly disagree	Agree	Unsure/neutral	Unsure/neutral	Unsure/neutral	Agree	Agree	Agree	Agree	Agree	Agree	Agree	Unsure/neutral	Agree	Agree	Unsure/neutral	Agree	Agree	Agree	Agree	Agree	Agree	Unsure/neutral	Agree	Agree	Unsure/neutral	Strongly agree	Strongly agree	Strongly disagree	Strongly agree	Agree	Strongly disagree	Strongly agree	Strongly agree	Strongly disagree	Strongly agree
Auckland Region	Strongly disagree	Disagree	Strongly disagree	Agree	Disagree	Disagree	Disagree	Disagree	Agree	Agree	Strongly disagree	Unsure/neutral	Agree	Disagree	Unsure/neutral	Agree	Unsure/neutral	Agree	Agree	Unsure/neutral	Agree	Unsure/neutral	Disagree	Agree	Unsure/neutral	Unsure/neutral	Unsure/neutral	Disagree	Agree	Unsure/neutral	Unsure/neutral	Unsure/neutral	Unsure/neutral	Unsure/neutral	Unsure/neutral	Disagree	Unsure/neutral	Unsure/neutral	Unsure/neutral	Unsure/neutral	Unsure/neutral	Disagree	Unsure/neutral	Unsure/neutral	Unsure/neutral	Unsure/neutral	Unsure/neutral	Unsure/neutral	Unsure/neutral
Northland Region	Strongly disagree	Disagree	Strongly disagree	Disagree	Strongly disagree	Strongly disagree	Strongly agree	Strongly disagree	Agree	Strongly disagree	Disagree	Unsure/neutral	Agree	Strongly disagree	Unsure/neutral	Disagree	Agree	Unsure/neutral	Agree	Agree	Unsure/neutral	Agree	Agree	Agree	Unsure/neutral	Unsure/neutral	Unsure/neutral	Unsure/neutral	Unsure/neutral	Agree	Unsure/neutral	Disagree	Agree	Unsure/neutral	Disagree	Disagree	Disagree	Agree	Unsure/neutral	Agree	Unsure/neutral	Disagree	Unsure/neutral	Disagree	Disagree	Unsure/neutral	Unsure/neutral	Disagree	Unsure/neutral
Auckland Region	Strongly disagree	Strongly disagree	Strongly disagree	Unsure/neutral	Strongly disagree	Disagree	Strongly agree	Strongly disagree	Strongly disagree	Strongly disagree	Unsure/neutral	Agree	Agree	Strongly disagree	Unsure/neutral	Strongly agree	Agree	Disagree	Strongly agree	Agree	Agree	Agree	Agree	Unsure/neutral	Disagree	Unsure/neutral	Unsure/neutral	Unsure/neutral	Unsure/neutral	Agree	Agree	Unsure/neutral	Unsure/neutral	Unsure/neutral	Unsure/neutral	Unsure/neutral	Unsure/neutral	Unsure/neutral	Unsure/neutral	Unsure/neutral	Unsure/neutral	Unsure/neutral	Unsure/neutral	Unsure/neutral	Unsure/neutral	Unsure/neutral	Disagree	Agree	Agree
Auckland Region	Disagree	Disagree	Strongly disagree	Strongly disagree	Strongly disagree	Strongly disagree	Strongly agree	Disagree	Agree	Disagree	Strongly disagree	Strongly disagree	Strongly agree	Unsure/neutral	Strongly agree	Agree	Strongly disagree	Strongly disagree	Disagree	Agree	Strongly agree	Agree	Agree	Strongly agree	Agree	Agree	Agree	Agree	Agree	Unsure/neutral	Agree	Unsure/neutral	Unsure/neutral	Unsure/neutral	Unsure/neutral	Strongly agree	Strongly agree	Strongly agree	Unsure/neutral	Unsure/neutral	Strongly agree	Unsure/neutral	Unsure/neutral	Strongly agree	Unsure/neutral	Strongly agree	Strongly agree	Strongly agree	Strongly agree
Southland Region	Strongly disagree	Disagree	Strongly disagree	Unsure/neutral	Disagree	Strongly disagree	Strongly agree	Agree	Unsure/neutral	Unsure/neutral	Agree	Strongly agree	Strongly agree	Agree	Strongly agree	Strongly agree	Unsure/neutral	Agree	Agree	Strongly agree	Strongly agree	Strongly agree	Agree	Strongly agree	Agree	Agree	Agree	Agree	Agree	Agree	Strongly agree	Agree	Agree	Strongly agree	Strongly agree	Unsure/neutral	Unsure/neutral	Disagree	Agree	Agree	Unsure/neutral	Agree	Agree	Unsure/neutral	Agree	Unsure/neutral	Agree	Disagree	Unsure/neutral
Gisborne Region	Strongly disagree	Strongly disagree	Strongly disagree	Disagree	Strongly disagree	Strongly disagree	Strongly agree	Strongly disagree	Strongly agree	Strongly disagree	Strongly agree	Strongly agree	Strongly agree	Strongly disagree	Strongly agree	Strongly agree	Strongly disagree	Strongly disagree	Disagree	Strongly agree	Strongly agree	Strongly agree	Strongly agree	Strongly agree	Strongly agree	Strongly agree	Strongly agree	Strongly agree	Agree	Strongly agree	Strongly agree	Strongly disagree	Strongly agree	Strongly agree	Strongly disagree	Strongly agree	Strongly agree	Strongly agree	Agree	Strongly agree	Strongly agree	Strongly disagree	Strongly agree	Strongly agree	Strongly disagree	Strongly agree	Strongly agree	Strongly disagree	Strongly agree
Bay of Plenty Region	Disagree	Disagree	Strongly disagree	Disagree	Disagree	Disagree	Agree	Disagree	Agree	Disagree	Unsure/neutral	Unsure/neutral	Agree	Disagree	Agree	Agree	Disagree	Unsure/neutral	Unsure/neutral	Agree	Agree	Agree	Agree	Agree	Agree	Agree	Unsure/neutral	Agree	Agree	Agree	Agree	Unsure/neutral	Unsure/neutral	Agree	Unsure/neutral	Agree	Unsure/neutral	Agree	Unsure/neutral	Agree	Agree	Unsure/neutral	Unsure/neutral	Agree	Disagree	Agree	Agree	Disagree	Agree
Auckland Region	Disagree	Agree	Disagree	Strongly agree	Agree	Strongly agree	Strongly agree	Unsure/neutral	Disagree	Strongly agree	Strongly disagree	Disagree	Strongly disagree	Strongly disagree	Strongly disagree	Disagree	Strongly agree	Agree	Agree	Unsure/neutral	Agree	Agree	Strongly disagree	Disagree	Unsure/neutral	Strongly disagree	Strongly disagree	Strongly disagree	Disagree	Agree	Unsure/neutral	Agree	Agree	Strongly disagree	Disagree	Strongly disagree	Strongly disagree	Strongly disagree	Strongly disagree	Strongly disagree	Strongly disagree	Strongly disagree	Unsure/neutral	Strongly disagree	Strongly disagree	Disagree	Disagree	Unsure/neutral	Strongly disagree
Manawatu-Whanganui Region	Strongly disagree	Agree	Strongly disagree	Disagree	Disagree	Disagree	Strongly agree	Disagree	Strongly agree	Disagree	Agree	Agree	Agree	Unsure/neutral	Agree	Agree	Agree	Agree	Disagree	Agree	Agree	Strongly agree	Strongly agree	Strongly agree	Agree	Strongly agree	Strongly agree	Strongly agree	Strongly agree	Strongly agree	Strongly agree	Strongly agree	Strongly agree	Strongly agree	Agree	Strongly agree	Strongly agree	Strongly agree	Strongly agree	Strongly agree	Strongly agree	Strongly disagree	Strongly agree	Strongly agree	Strongly disagree	Strongly agree	Strongly agree	Strongly disagree	Strongly agree
Auckland Region	Strongly disagree	Unsure/neutral	Strongly disagree	Strongly disagree	Strongly disagree	Disagree	Strongly agree	Strongly disagree	Disagree	Strongly disagree	Strongly agree	Disagree	Agree	Disagree	Strongly agree	Agree	Disagree	Disagree	Unsure/neutral	Agree	Agree	Agree	Agree	Agree	Agree	Agree	Agree	Agree	Agree	Agree	Agree	Agree	Agree	Agree	Unsure/neutral	Agree	Agree	Agree	Agree	Agree	Agree	Agree	Agree	Agree	Agree	Agree	Agree	Agree	Agree
Wellington Region	Disagree	Disagree	Strongly disagree	Disagree	Disagree	Disagree	Agree	Disagree	Unsure/neutral	Disagree	Unsure/neutral	Unsure/neutral	Unsure/neutral	Disagree	Agree	Agree	Disagree	Disagree	Disagree	Strongly agree	Agree	Agree	Agree	Agree	Agree	Agree	Agree	Unsure/neutral	Unsure/neutral	Unsure/neutral	Agree	Agree	Unsure/neutral	Agree	Agree	Unsure/neutral	Unsure/neutral	Unsure/neutral	Unsure/neutral	Unsure/neutral	Agree	Disagree	Agree	Agree	Disagree	Agree	Agree	Strongly disagree	Agree
Auckland Region	Strongly disagree	Disagree	Strongly disagree	Strongly disagree	Unsure/neutral	Disagree	Unsure/neutral	Strongly disagree	Unsure/neutral	Disagree	Disagree	Disagree	Agree	Disagree	Agree	Agree	Disagree	Disagree	Agree	Agree	Agree	Agree	Agree	Agree	Agree	Unsure/neutral	Unsure/neutral	Unsure/neutral	Unsure/neutral	Agree	Agree	Agree	Agree	Unsure/neutral	Agree	Unsure/neutral	Disagree	Disagree	Disagree	Agree	Unsure/neutral	Agree	Agree	Unsure/neutral	Agree	Agree	Agree	Disagree	Agree
Waikato Region	Strongly disagree	Strongly agree	Strongly agree	Strongly agree	Disagree	Agree	Strongly agree	Disagree	Strongly agree	Strongly agree	Strongly agree	Unsure/neutral	Unsure/neutral	Strongly disagree	Strongly agree	Unsure/neutral	Disagree	Agree	Unsure/neutral	Strongly agree	Unsure/neutral	Agree	Agree	Agree	Unsure/neutral	Strongly agree	Agree	Agree	Strongly agree	Strongly disagree	Unsure/neutral	Unsure/neutral	Agree	Unsure/neutral	Unsure/neutral	Agree	Agree	Agree	Agree	Strongly agree	Agree	Agree	Agree	Disagree	Agree	Unsure/neutral	Unsure/neutral	Agree	Unsure/neutral
Northland Region	Disagree	Disagree	Disagree	Disagree	Disagree	Disagree	Agree	Disagree	Agree	Disagree	Agree	Agree	Agree	Strongly disagree	Agree	Agree	Disagree	Unsure/neutral	Unsure/neutral	Agree	Agree	Agree	Agree	Agree	Agree	Agree	Agree	Agree	Agree	Agree	Agree	Unsure/neutral	Agree	Agree	Agree	Agree	Unsure/neutral	Agree	Unsure/neutral	Agree	Agree	Unsure/neutral	Agree	Agree	Disagree	Agree	Agree	Strongly disagree	Agree
Gisborne Region	Unsure/neutral	Disagree	Unsure/neutral	Disagree	Agree	Strongly disagree	Agree	Agree	Unsure/neutral	Disagree	Agree	Strongly agree	Unsure/neutral	Strongly disagree	Unsure/neutral	Agree	Strongly agree	Strongly agree	Unsure/neutral	Agree	Disagree	Unsure/neutral	Agree	Strongly agree	Strongly disagree	Disagree	Agree	Unsure/neutral	Unsure/neutral	Unsure/neutral	Unsure/neutral	Agree	Agree	Unsure/neutral	Strongly disagree	Unsure/neutral	Unsure/neutral	Agree	Agree	Unsure/neutral	Agree	Disagree	Disagree	Unsure/neutral	Unsure/neutral	Unsure/neutral	Unsure/neutral	Unsure/neutral	Unsure/neutral
Otago Region	Strongly disagree	Strongly disagree	Strongly disagree	Strongly disagree	Strongly disagree	Strongly disagree	Strongly agree	Strongly disagree	Strongly disagree	Strongly disagree	Strongly disagree	Strongly agree	Strongly agree	Strongly disagree	Strongly agree	Strongly agree	Strongly disagree	Strongly disagree	Strongly agree	Strongly agree	Strongly agree	Strongly agree	Strongly agree	Strongly agree	Strongly agree	Strongly agree	Strongly agree	Strongly agree	Unsure/neutral	Strongly agree	Strongly agree	Strongly agree	Strongly agree	Strongly agree	Unsure/neutral	Strongly agree	Unsure/neutral	Strongly agree	Unsure/neutral	Strongly agree	Strongly agree	Agree	Strongly agree	Strongly agree	Strongly disagree	Strongly agree	Strongly agree	Strongly disagree	Strongly agree
Auckland Region	Disagree	Unsure/neutral	Disagree	Disagree	Disagree	Agree	Agree	Disagree	Agree	Unsure/neutral	Unsure/neutral	Strongly agree	Agree	Agree	Agree	Agree	Agree	Agree	Agree	Agree	Strongly agree	Strongly agree	Strongly agree	Strongly agree	Strongly agree	Strongly agree	Agree	Agree	Agree	Agree	Strongly agree	Unsure/neutral	Agree	Strongly agree	Disagree	Agree	Agree	Agree	Disagree	Agree	Agree	Disagree	Agree	Strongly agree	Disagree	Agree	Agree	Disagree	Agree
Northland Region	Disagree	Unsure/neutral	Disagree	Unsure/neutral	Disagree	Unsure/neutral	Agree	Disagree	Unsure/neutral	Unsure/neutral	Unsure/neutral	Agree	Agree	Disagree	Unsure/neutral	Agree	Unsure/neutral	Unsure/neutral	Agree	Agree	Agree	Unsure/neutral	Agree	Agree	Unsure/neutral	Agree	Unsure/neutral	Disagree	Agree	Unsure/neutral	Unsure/neutral	Agree	Unsure/neutral	Unsure/neutral	Agree	Unsure/neutral	Unsure/neutral	Unsure/neutral	Unsure/neutral	Unsure/neutral	Agree	Agree	Unsure/neutral	Unsure/neutral	Agree	Agree	Agree	Disagree	Unsure/neutral
Northland Region	Strongly disagree	Disagree	Strongly disagree	Strongly disagree	Strongly disagree	Strongly disagree	Strongly agree	Strongly disagree	Unsure/neutral	Strongly disagree	Strongly disagree	Strongly agree	Strongly agree	Unsure/neutral	Strongly agree	Agree	Strongly disagree	Disagree	Unsure/neutral	Strongly agree	Strongly agree	Strongly agree	Strongly agree	Strongly agree	Strongly agree	Agree	Strongly agree	Strongly agree	Unsure/neutral	Strongly agree	Strongly agree	Disagree	Strongly agree	Strongly agree	Disagree	Strongly agree	Disagree	Strongly agree	Agree	Agree	Strongly agree	Disagree	Strongly agree	Agree	Strongly disagree	Strongly agree	Strongly agree	Strongly disagree	Strongly agree
Auckland Region	Strongly disagree	Strongly agree	Strongly disagree	Strongly disagree	Strongly disagree	Strongly disagree	Strongly agree	Strongly disagree	Strongly agree	Strongly disagree	Strongly agree	Unsure/neutral	Unsure/neutral	Strongly disagree	Strongly agree	Strongly agree	Disagree	Strongly disagree	Strongly agree	Strongly agree	Strongly agree	Strongly agree	Strongly agree	Strongly agree	Strongly agree	Strongly agree	Strongly agree	Agree	Strongly agree	Strongly agree	Strongly agree	Strongly agree	Strongly agree	Strongly agree	Strongly agree	Agree	Strongly agree	Agree	Unsure/neutral	Strongly agree	Strongly agree	Disagree	Strongly agree	Strongly agree	Disagree	Strongly agree	Strongly agree	Strongly disagree	Strongly agree
Wellington Region	Strongly disagree	Strongly disagree	Strongly disagree	Disagree	Disagree	Disagree	Agree	Strongly disagree	Unsure/neutral	Strongly disagree	Strongly agree	Agree	Agree	Strongly disagree	Agree	Agree	Disagree	Disagree	Agree	Agree	Agree	Agree	Agree	Agree	Agree	Unsure/neutral	Unsure/neutral	Disagree	Disagree	Agree	Disagree	Agree	Unsure/neutral	Agree	Unsure/neutral	Unsure/neutral	Disagree	Unsure/neutral	Disagree	Agree	Agree	Disagree	Disagree	Unsure/neutral	Disagree	Unsure/neutral	Agree	Disagree	Agree
Marlborough Region	Disagree	Agree	Agree	Agree	Agree	Agree	Agree	Agree	Agree	Agree	Agree	Agree	Agree	Agree	Agree	Agree	Agree	Agree	Agree	Agree	Agree	Agree	Agree	Agree	Agree	Agree	Agree	Agree	Agree	Agree	Agree	Agree	Agree	Agree	Agree	Agree	Agree	Agree	Agree	Agree	Agree	Agree	Agree	Agree	Agree	Unsure/neutral	Agree	Unsure/neutral	Agree
Canterbury Region	Strongly disagree	Agree	Strongly disagree	Unsure/neutral	Unsure/neutral	Disagree	Agree	Strongly disagree	Agree	Disagree	Agree	Unsure/neutral	Unsure/neutral	Strongly disagree	Agree	Agree	Agree	Agree	Agree	Agree	Agree	Unsure/neutral	Disagree	Agree	Unsure/neutral	Unsure/neutral	Agree	Unsure/neutral	Unsure/neutral	Unsure/neutral	Unsure/neutral	Agree	Agree	Unsure/neutral	Agree	Disagree	Unsure/neutral	Unsure/neutral	Unsure/neutral	Agree	Unsure/neutral	Unsure/neutral	Agree	Unsure/neutral	Agree	Agree	Agree	Unsure/neutral	Agree
Auckland Region	Strongly disagree	Unsure/neutral	Disagree	Agree	Unsure/neutral	Agree	Agree	Unsure/neutral	Disagree	Agree	Disagree	Unsure/neutral	Agree	Disagree	Unsure/neutral	Disagree	Agree	Agree	Agree	Disagree	Unsure/neutral	Disagree	Disagree	Unsure/neutral	Disagree	Disagree	Disagree	Strongly disagree	Agree	Agree	Disagree	Unsure/neutral	Agree	Disagree	Disagree	Strongly disagree	Strongly disagree	Strongly disagree	Strongly disagree	Agree	Strongly disagree	Strongly disagree	Agree	Strongly disagree	Strongly disagree	Strongly disagree	Strongly disagree	Agree	Strongly disagree
Auckland Region	Unsure/neutral	Unsure/neutral	Unsure/neutral	Unsure/neutral	Unsure/neutral	Unsure/neutral	Unsure/neutral	Unsure/neutral	Unsure/neutral	Unsure/neutral	Unsure/neutral	Unsure/neutral	Unsure/neutral	Unsure/neutral	Unsure/neutral	Unsure/neutral	Unsure/neutral	Unsure/neutral	Unsure/neutral	Unsure/neutral	Unsure/neutral	Unsure/neutral	Unsure/neutral	Unsure/neutral	Unsure/neutral	Unsure/neutral	Unsure/neutral	Unsure/neutral	Unsure/neutral	Unsure/neutral	Unsure/neutral	Unsure/neutral	Unsure/neutral	Unsure/neutral	Unsure/neutral	Unsure/neutral	Unsure/neutral	Unsure/neutral	Unsure/neutral	Unsure/neutral	Unsure/neutral	Unsure/neutral	Unsure/neutral	Unsure/neutral	Unsure/neutral	Unsure/neutral	Unsure/neutral	Unsure/neutral	Unsure/neutral
Canterbury Region	Strongly disagree	Agree	Strongly disagree	Strongly disagree	Strongly disagree	Strongly disagree	Strongly agree	Strongly disagree	Strongly agree	Disagree	Strongly agree	Agree	Strongly agree	Strongly disagree	Strongly agree	Strongly agree	Disagree	Strongly disagree	Unsure/neutral	Strongly agree	Strongly agree	Strongly agree	Strongly agree	Strongly agree	Strongly agree	Strongly agree	Strongly agree	Strongly agree	Unsure/neutral	Agree	Strongly agree	Strongly agree	Agree	Strongly agree	Strongly agree	Strongly agree	Unsure/neutral	Unsure/neutral	Unsure/neutral	Unsure/neutral	Strongly disagree	Strongly agree	Agree	Unsure/neutral	Unsure/neutral	Strongly agree	Strongly agree	Strongly disagree	Strongly agree
Auckland Region	Unsure/neutral	Unsure/neutral	Unsure/neutral	Unsure/neutral	Unsure/neutral	Unsure/neutral	Unsure/neutral	Unsure/neutral	Unsure/neutral	Unsure/neutral	Unsure/neutral	Unsure/neutral	Unsure/neutral	Unsure/neutral	Unsure/neutral	Unsure/neutral	Unsure/neutral	Unsure/neutral	Unsure/neutral	Unsure/neutral	Unsure/neutral	Unsure/neutral	Unsure/neutral	Unsure/neutral	Unsure/neutral	Unsure/neutral	Unsure/neutral	Unsure/neutral	Unsure/neutral	Unsure/neutral	Unsure/neutral	Unsure/neutral	Unsure/neutral	Unsure/neutral	Unsure/neutral	Unsure/neutral	Unsure/neutral	Unsure/neutral	Unsure/neutral	Unsure/neutral	Unsure/neutral	Unsure/neutral	Unsure/neutral	Unsure/neutral	Unsure/neutral	Unsure/neutral	Unsure/neutral	Unsure/neutral	Unsure/neutral
Auckland Region	Strongly disagree	Disagree	Strongly disagree	Strongly agree	Strongly disagree	Unsure/neutral	Strongly agree	Unsure/neutral	Strongly disagree	Unsure/neutral	Unsure/neutral	Strongly agree	Strongly agree	Strongly disagree	Agree	Agree	Agree	Disagree	Strongly agree	Agree	Unsure/neutral	Unsure/neutral	Agree	Agree	Unsure/neutral	Disagree	Unsure/neutral	Disagree	Disagree	Disagree	Disagree	Agree	Disagree	Unsure/neutral	Unsure/neutral	Strongly disagree	Disagree	Strongly disagree	Disagree	Strongly disagree	Disagree	Disagree	Strongly disagree	Strongly disagree	Disagree	Unsure/neutral	Unsure/neutral	Unsure/neutral	Unsure/neutral
Canterbury Region	Strongly disagree	Strongly disagree	Strongly disagree	Strongly disagree	Strongly disagree	Strongly disagree	Strongly agree	Strongly disagree	Strongly agree	Strongly disagree	Strongly agree	Strongly agree	Strongly agree	Strongly disagree	Strongly agree	Strongly agree	Strongly disagree	Strongly disagree	Strongly disagree	Strongly agree	Strongly agree	Strongly agree	Strongly agree	Strongly agree	Strongly agree	Strongly agree	Strongly agree	Strongly agree	Strongly agree	Strongly agree	Strongly agree	Strongly agree	Strongly agree	Strongly agree	Strongly disagree	Strongly agree	Strongly agree	Strongly agree	Strongly agree	Strongly agree	Strongly agree	Strongly disagree	Strongly agree	Strongly agree	Strongly disagree	Strongly agree	Strongly agree	Strongly disagree	Strongly agree
Auckland Region	Unsure/neutral	Unsure/neutral	Unsure/neutral	Unsure/neutral	Unsure/neutral	Unsure/neutral	Unsure/neutral	Unsure/neutral	Unsure/neutral	Unsure/neutral	Unsure/neutral	Unsure/neutral	Unsure/neutral	Unsure/neutral	Unsure/neutral	Unsure/neutral	Unsure/neutral	Unsure/neutral	Unsure/neutral	Unsure/neutral	Agree	Agree	Unsure/neutral	Unsure/neutral	Agree	Unsure/neutral	Unsure/neutral	Agree	Agree	Unsure/neutral	Unsure/neutral	Agree	Unsure/neutral	Agree	Unsure/neutral	Unsure/neutral	Agree	Unsure/neutral	Unsure/neutral	Agree	Unsure/neutral	Agree	Agree	Agree	Unsure/neutral	Unsure/neutral	Agree	Agree	Unsure/neutral
Wellington Region	Strongly disagree	Disagree	Strongly disagree	Strongly disagree	Strongly disagree	Disagree	Agree	Strongly disagree	Agree	Disagree	Agree	Agree	Agree	Strongly disagree	Unsure/neutral	Unsure/neutral	Unsure/neutral	Unsure/neutral	Agree	Agree	Unsure/neutral	Agree	Agree	Agree	Unsure/neutral	Agree	Unsure/neutral	Disagree	Strongly agree	Agree	Unsure/neutral	Strongly agree	Agree	Disagree	Agree	Agree	Agree	Unsure/neutral	Agree	Agree	Agree	Disagree	Agree	Unsure/neutral	Disagree	Agree	Agree	Strongly disagree	Agree
Wellington Region	Strongly disagree	Disagree	Strongly disagree	Strongly disagree	Strongly disagree	Strongly disagree	Agree	Strongly disagree	Unsure/neutral	Strongly disagree	Strongly agree	Agree	Agree	Disagree	Agree	Agree	Disagree	Disagree	Agree	Strongly agree	Strongly agree	Strongly agree	Strongly agree	Strongly agree	Strongly agree	Agree	Strongly agree	Agree	Disagree	Agree	Agree	Strongly agree	Strongly agree	Agree	Strongly agree	Agree	Unsure/neutral	Disagree	Unsure/neutral	Agree	Agree	Disagree	Strongly agree	Agree	Disagree	Agree	Agree	Strongly disagree	Agree
Tasman/ Nelson Region	Strongly disagree	Disagree	Strongly disagree	Strongly disagree	Disagree	Strongly disagree	Agree	Strongly disagree	Strongly agree	Strongly disagree	Agree	Unsure/neutral	Agree	Strongly disagree	Strongly agree	Strongly agree	Unsure/neutral	Unsure/neutral	Strongly agree	Strongly agree	Strongly agree	Strongly agree	Agree	Strongly agree	Strongly agree	Agree	Agree	Unsure/neutral	Agree	Agree	Agree	Strongly agree	Agree	Strongly agree	Disagree	Agree	Agree	Agree	Agree	Agree	Strongly agree	Strongly disagree	Agree	Strongly agree	Strongly disagree	Strongly agree	Strongly agree	Strongly disagree	Strongly agree
Otago Region	Strongly disagree	Disagree	Strongly disagree	Unsure/neutral	Strongly disagree	Strongly disagree	Agree	Strongly disagree	Agree	Disagree	Agree	Unsure/neutral	Agree	Strongly disagree	Agree	Strongly agree	Disagree	Unsure/neutral	Agree	Agree	Agree	Agree	Agree	Agree	Agree	Disagree	Agree	Agree	Strongly agree	Unsure/neutral	Strongly agree	Agree	Agree	Agree	Agree	Unsure/neutral	Unsure/neutral	Strongly agree	Unsure/neutral	Unsure/neutral	Strongly agree	Strongly disagree	Strongly agree	Strongly agree	Strongly disagree	Strongly agree	Strongly agree	Strongly disagree	Strongly agree
Auckland Region	Agree	Disagree	Disagree	Agree	Disagree	Strongly disagree	Strongly agree	Disagree	Unsure/neutral	Disagree	Strongly agree	Strongly agree	Strongly agree	Unsure/neutral	Strongly agree	Strongly agree	Disagree	Disagree	Agree	Strongly agree	Strongly agree	Strongly agree	Agree	Strongly agree	Agree	Strongly agree	Strongly agree	Strongly agree	Agree	Agree	Strongly agree	Strongly agree	Strongly agree	Strongly agree	Strongly agree	Agree	Agree	Agree	Strongly agree	Agree	Strongly agree	Disagree	Strongly agree	Unsure/neutral	Agree	Strongly agree	Strongly agree	Strongly disagree	Strongly agree
Auckland Region	Strongly disagree	Strongly disagree	Strongly disagree	Strongly disagree	Strongly agree	Strongly disagree	Strongly agree	Strongly disagree	Disagree	Disagree	Agree	Strongly agree	Disagree	Strongly disagree	Strongly agree	Strongly agree	Disagree	Disagree	Strongly agree	Strongly agree	Agree	Unsure/neutral	Agree	Agree	Agree	Agree	Agree	Unsure/neutral	Agree	Agree	Agree	Disagree	Agree	Agree	Disagree	Agree	Agree	Disagree	Unsure/neutral	Agree	Agree	Strongly disagree	Agree	Agree	Strongly disagree	Agree	Agree	Disagree	Agree
Northland Region	Agree	Unsure/neutral	Disagree	Strongly agree	Strongly disagree	Agree	Strongly agree	Agree	Unsure/neutral	Agree	Disagree	Strongly disagree	Strongly disagree	Strongly disagree	Disagree	Unsure/neutral	Agree	Strongly agree	Agree	Disagree	Disagree	Unsure/neutral	Disagree	Disagree	Disagree	Disagree	Strongly disagree	Disagree	Unsure/neutral	Agree	Strongly disagree	Unsure/neutral	Strongly agree	Strongly disagree	Unsure/neutral	Strongly disagree	Strongly disagree	Strongly disagree	Strongly disagree	Agree	Strongly disagree	Strongly disagree	Strongly agree	Strongly disagree	Strongly disagree	Strongly disagree	Strongly disagree	Strongly agree	Strongly disagree
Taranaki Region	Strongly agree	Strongly agree	Unsure/neutral	Strongly agree	Unsure/neutral	Strongly agree	Unsure/neutral	Strongly agree	Strongly disagree	Strongly agree	Strongly disagree	Strongly disagree	Strongly disagree	Strongly disagree	Strongly disagree	Strongly disagree	Strongly agree	Strongly agree	Strongly agree	Strongly disagree	Strongly disagree	Strongly disagree	Strongly disagree	Strongly disagree	Strongly disagree	Strongly disagree	Strongly disagree	Strongly disagree	Strongly agree	Strongly disagree	Strongly disagree	Strongly disagree	Strongly agree	Strongly disagree	Strongly disagree	Strongly disagree	Strongly disagree	Strongly disagree	Strongly disagree	Strongly disagree	Strongly disagree	Strongly disagree	Strongly disagree	Strongly disagree	Strongly disagree	Strongly disagree	Strongly disagree	Strongly agree	Strongly disagree
Auckland Region	Disagree	Disagree	Unsure/neutral	Unsure/neutral	Disagree	Disagree	Agree	Disagree	Unsure/neutral	Unsure/neutral	Unsure/neutral	Unsure/neutral	Agree	Disagree	Agree	Agree	Unsure/neutral	Agree	Agree	Agree	Unsure/neutral	Unsure/neutral	Unsure/neutral	Agree	Unsure/neutral	Unsure/neutral	Agree	Unsure/neutral	Agree	Unsure/neutral	Unsure/neutral	Agree	Unsure/neutral	Unsure/neutral	Unsure/neutral	Unsure/neutral	Unsure/neutral	Unsure/neutral	Unsure/neutral	Unsure/neutral	Unsure/neutral	Unsure/neutral	Unsure/neutral	Unsure/neutral	Unsure/neutral	Unsure/neutral	Unsure/neutral	Unsure/neutral	Unsure/neutral
Waikato Region	Disagree	Disagree	Strongly disagree	Unsure/neutral	Disagree	Disagree	Agree	Disagree	Agree	Disagree	Agree	Agree	Agree	Disagree	Agree	Agree	Disagree	Agree	Agree	Agree	Agree	Agree	Agree	Agree	Agree	Agree	Agree	Agree	Agree	Agree	Agree	Agree	Agree	Agree	Agree	Agree	Agree	Agree	Agree	Agree	Agree	Disagree	Agree	Agree	Disagree	Agree	Agree	Disagree	Agree
Northland Region	Strongly agree	Disagree	Agree	Unsure/neutral	Unsure/neutral	Strongly agree	Agree	Strongly agree	Agree	Agree	Agree	Unsure/neutral	Agree	Strongly agree	Strongly agree	Strongly agree	Agree	Strongly agree	Unsure/neutral	Agree	Strongly agree	Strongly agree	Agree	Strongly agree	Strongly agree	Agree	Agree	Strongly agree	Unsure/neutral	Agree	Strongly agree	Strongly agree	Agree	Strongly agree	Unsure/neutral	Unsure/neutral	Strongly agree	Agree	Strongly agree	Agree	Unsure/neutral	Unsure/neutral	Strongly agree	Disagree	Unsure/neutral	Disagree	Agree	Agree	Unsure/neutral
Canterbury Region	Strongly disagree	Disagree	Strongly disagree	Strongly disagree	Strongly disagree	Strongly disagree	Agree	Strongly disagree	Agree	Disagree	Strongly agree	Agree	Unsure/neutral	Disagree	Strongly agree	Agree	Disagree	Unsure/neutral	Unsure/neutral	Strongly agree	Strongly agree	Strongly agree	Strongly agree	Strongly agree	Strongly agree	Strongly agree	Strongly agree	Strongly agree	Strongly disagree	Agree	Strongly agree	Disagree	Agree	Strongly agree	Disagree	Strongly agree	Strongly agree	Strongly agree	Strongly agree	Strongly agree	Strongly agree	Disagree	Strongly agree	Strongly agree	Strongly disagree	Strongly agree	Strongly agree	Strongly disagree	Strongly agree
Auckland Region	Strongly disagree	Unsure/neutral	Strongly disagree	Strongly disagree	Strongly agree	Unsure/neutral	Agree	Disagree	Disagree	Disagree	Agree	Agree	Agree	Strongly disagree	Strongly agree	Agree	Disagree	Disagree	Disagree	Strongly agree	Strongly agree	Strongly agree	Strongly agree	Strongly agree	Strongly agree	Strongly agree	Strongly agree	Strongly agree	Strongly agree	Strongly agree	Strongly agree	Agree	Strongly agree	Strongly agree	Agree	Agree	Unsure/neutral	Agree	Unsure/neutral	Agree	Strongly agree	Disagree	Strongly agree	Agree	Unsure/neutral	Strongly agree	Strongly agree	Strongly disagree	Strongly agree
Taranaki Region	Strongly disagree	Disagree	Strongly disagree	Strongly agree	Strongly disagree	Strongly disagree	Strongly agree	Strongly disagree	Unsure/neutral	Strongly disagree	Disagree	Unsure/neutral	Agree	Strongly disagree	Strongly agree	Agree	Strongly disagree	Strongly disagree	Unsure/neutral	Strongly agree	Strongly agree	Strongly agree	Strongly agree	Strongly agree	Strongly agree	Agree	Strongly agree	Agree	Unsure/neutral	Strongly agree	Strongly agree	Strongly agree	Strongly agree	Strongly agree	Strongly agree	Agree	Agree	Agree	Agree	Agree	Strongly agree	Agree	Strongly agree	Strongly agree	Agree	Strongly agree	Strongly agree	Strongly disagree	Strongly agree
Auckland Region	Disagree	Disagree	Unsure/neutral	Strongly agree	Unsure/neutral	Strongly agree	Strongly agree	Strongly agree	Unsure/neutral	Agree	Strongly disagree	Strongly disagree	Agree	Strongly disagree	Disagree	Disagree	Agree	Agree	Agree	Disagree	Disagree	Strongly disagree	Strongly disagree	Unsure/neutral	Strongly disagree	Strongly disagree	Strongly disagree	Strongly disagree	Unsure/neutral	Strongly disagree	Strongly disagree	Agree	Agree	Strongly disagree	Disagree	Strongly disagree	Strongly disagree	Strongly disagree	Strongly disagree	Strongly disagree	Strongly disagree	Strongly disagree	Agree	Strongly disagree	Strongly disagree	Strongly disagree	Strongly disagree	Strongly agree	Strongly disagree
Manawatu-Whanganui Region	Strongly disagree	Unsure/neutral	Strongly disagree	Unsure/neutral	Disagree	Disagree	Agree	Strongly disagree	Unsure/neutral	Disagree	Agree	Agree	Agree	Unsure/neutral	Agree	Agree	Unsure/neutral	Unsure/neutral	Agree	Agree	Agree	Agree	Agree	Agree	Agree	Agree	Agree	Agree	Agree	Agree	Agree	Agree	Agree	Agree	Agree	Agree	Agree	Agree	Unsure/neutral	Agree	Agree	Unsure/neutral	Agree	Agree	Disagree	Agree	Agree	Disagree	Agree
Waikato Region	Disagree	Unsure/neutral	Strongly disagree	Disagree	Unsure/neutral	Disagree	Strongly agree	Agree	Unsure/neutral	Agree	Strongly agree	Agree	Strongly agree	Disagree	Agree	Unsure/neutral	Agree	Strongly agree	Strongly agree	Agree	Agree	Agree	Agree	Strongly agree	Strongly agree	Strongly agree	Unsure/neutral	Strongly agree	Disagree	Unsure/neutral	Agree	Agree	Agree	Agree	Agree	Strongly agree	Strongly agree	Strongly agree	Unsure/neutral	Strongly agree	Strongly agree	Disagree	Agree	Strongly agree	Disagree	Strongly agree	Strongly agree	Strongly disagree	Strongly agree
Canterbury Region	Strongly disagree	Disagree	Strongly disagree	Disagree	Disagree	Disagree	Unsure/neutral	Disagree	Unsure/neutral	Disagree	Agree	Agree	Agree	Strongly disagree	Agree	Agree	Unsure/neutral	Agree	Agree	Agree	Agree	Strongly agree	Strongly agree	Strongly agree	Strongly agree	Strongly agree	Strongly agree	Agree	Unsure/neutral	Agree	Agree	Unsure/neutral	Agree	Agree	Unsure/neutral	Unsure/neutral	Unsure/neutral	Agree	Unsure/neutral	Agree	Agree	Disagree	Agree	Agree	Unsure/neutral	Strongly agree	Strongly agree	Strongly disagree	Strongly agree
Bay of Plenty Region	Disagree	Disagree	Strongly disagree	Strongly disagree	Disagree	Strongly disagree	Strongly agree	Disagree	Agree	Strongly disagree	Strongly agree	Strongly agree	Agree	Disagree	Strongly agree	Unsure/neutral	Disagree	Strongly disagree	Agree	Strongly agree	Strongly agree	Agree	Strongly agree	Strongly agree	Agree	Strongly agree	Strongly agree	Strongly agree	Agree	Strongly agree	Strongly agree	Agree	Agree	Strongly agree	Agree	Strongly agree	Strongly agree	Strongly agree	Strongly agree	Agree	Strongly agree	Disagree	Agree	Agree	Disagree	Strongly agree	Strongly agree	Strongly disagree	Strongly agree
Auckland Region	Strongly disagree	Unsure/neutral	Strongly disagree	Disagree	Disagree	Strongly disagree	Agree	Strongly disagree	Agree	Unsure/neutral	Agree	Unsure/neutral	Agree	Disagree	Agree	Agree	Disagree	Unsure/neutral	Unsure/neutral	Agree	Strongly agree	Strongly agree	Strongly agree	Strongly agree	Strongly agree	Agree	Agree	Agree	Disagree	Unsure/neutral	Strongly agree	Unsure/neutral	Unsure/neutral	Agree	Agree	Agree	Agree	Agree	Agree	Unsure/neutral	Agree	Unsure/neutral	Unsure/neutral	Agree	Unsure/neutral	Agree	Strongly agree	Disagree	Agree
Auckland Region	Disagree	Disagree	Disagree	Agree	Agree	Unsure/neutral	Agree	Disagree	Agree	Agree	Unsure/neutral	Agree	Agree	Disagree	Unsure/neutral	Unsure/neutral	Unsure/neutral	Unsure/neutral	Agree	Unsure/neutral	Agree	Agree	Agree	Agree	Agree	Agree	Agree	Agree	Agree	Agree	Agree	Agree	Agree	Agree	Agree	Agree	Agree	Agree	Agree	Agree	Agree	Agree	Agree	Agree	Agree	Strongly agree	Strongly agree	Strongly agree	Strongly agree
Canterbury Region	Disagree	Disagree	Disagree	Strongly agree	Disagree	Disagree	Agree	Agree	Disagree	Agree	Agree	Disagree	Disagree	Disagree	Disagree	Unsure/neutral	Unsure/neutral	Strongly agree	Strongly agree	Unsure/neutral	Unsure/neutral	Disagree	Unsure/neutral	Disagree	Unsure/neutral	Disagree	Disagree	Strongly disagree	Agree	Disagree	Disagree	Disagree	Agree	Disagree	Disagree	Strongly disagree	Disagree	Strongly disagree	Strongly disagree	Disagree	Disagree	Disagree	Disagree	Disagree	Disagree	Disagree	Unsure/neutral	Disagree	Unsure/neutral
Bay of Plenty Region	Strongly disagree	Disagree	Strongly disagree	Unsure/neutral	Disagree	Disagree	Agree	Strongly disagree	Agree	Disagree	Unsure/neutral	Unsure/neutral	Agree	Strongly disagree	Agree	Agree	Disagree	Unsure/neutral	Agree	Strongly agree	Agree	Agree	Strongly agree	Strongly agree	Strongly agree	Agree	Agree	Agree	Unsure/neutral	Unsure/neutral	Strongly agree	Strongly agree	Unsure/neutral	Strongly agree	Agree	Agree	Unsure/neutral	Agree	Agree	Unsure/neutral	Agree	Agree	Agree	Agree	Agree	Agree	Agree	Disagree	Agree
Canterbury Region	Disagree	Disagree	Strongly disagree	Disagree	Strongly disagree	Disagree	Agree	Disagree	Agree	Agree	Agree	Unsure/neutral	Agree	Disagree	Disagree	Agree	Disagree	Disagree	Disagree	Strongly agree	Agree	Agree	Agree	Agree	Agree	Agree	Agree	Unsure/neutral	Agree	Agree	Agree	Strongly agree	Agree	Agree	Agree	Agree	Unsure/neutral	Unsure/neutral	Unsure/neutral	Agree	Agree	Disagree	Agree	Agree	Disagree	Agree	Agree	Disagree	Agree
Canterbury Region	Strongly disagree	Unsure/neutral	Strongly disagree	Disagree	Unsure/neutral	Unsure/neutral	Strongly agree	Disagree	Agree	Disagree	Disagree	Disagree	Unsure/neutral	Strongly disagree	Agree	Disagree	Disagree	Unsure/neutral	Agree	Agree	Agree	Agree	Strongly agree	Agree	Agree	Agree	Agree	Agree	Agree	Agree	Agree	Agree	Agree	Agree	Agree	Agree	Unsure/neutral	Agree	Unsure/neutral	Agree	Agree	Disagree	Agree	Agree	Disagree	Agree	Agree	Disagree	Agree
Wellington Region	Disagree	Agree	Unsure/neutral	Agree	Disagree	Disagree	Agree	Disagree	Unsure/neutral	Unsure/neutral	Agree	Disagree	Agree	Disagree	Agree	Disagree	Agree	Agree	Agree	Agree	Agree	Agree	Unsure/neutral	Agree	Agree	Agree	Agree	Agree	Agree	Unsure/neutral	Agree	Agree	Unsure/neutral	Agree	Agree	Agree	Agree	Agree	Disagree	Agree	Agree	Disagree	Unsure/neutral	Agree	Agree	Agree	Agree	Disagree	Agree
Otago Region	Disagree	Unsure/neutral	Unsure/neutral	Agree	Disagree	Unsure/neutral	Agree	Unsure/neutral	Agree	Unsure/neutral	Unsure/neutral	Unsure/neutral	Unsure/neutral	Disagree	Disagree	Unsure/neutral	Agree	Agree	Agree	Unsure/neutral	Unsure/neutral	Unsure/neutral	Disagree	Unsure/neutral	Disagree	Disagree	Disagree	Disagree	Unsure/neutral	Unsure/neutral	Disagree	Unsure/neutral	Unsure/neutral	Disagree	Unsure/neutral	Disagree	Unsure/neutral	Disagree	Unsure/neutral	Unsure/neutral	Disagree	Unsure/neutral	Unsure/neutral	Disagree	Unsure/neutral	Unsure/neutral	Unsure/neutral	Unsure/neutral	Unsure/neutral
Hawke's Bay Region	Strongly disagree	Disagree	Strongly disagree	Disagree	Disagree	Strongly disagree	Strongly agree	Strongly disagree	Agree	Disagree	Agree	Unsure/neutral	Agree	Disagree	Agree	Agree	Disagree	Unsure/neutral	Agree	Strongly agree	Agree	Agree	Agree	Agree	Agree	Agree	Agree	Agree	Agree	Agree	Agree	Unsure/neutral	Agree	Agree	Agree	Strongly agree	Agree	Agree	Agree	Agree	Agree	Strongly disagree	Agree	Agree	Disagree	Strongly agree	Strongly agree	Strongly disagree	Strongly agree
Waikato Region	Strongly disagree	Strongly disagree	Strongly disagree	Strongly disagree	Strongly disagree	Strongly disagree	Strongly agree	Strongly disagree	Agree	Disagree	Agree	Strongly agree	Agree	Strongly disagree	Agree	Agree	Disagree	Agree	Agree	Strongly agree	Agree	Agree	Agree	Agree	Agree	Disagree	Agree	Agree	Agree	Agree	Agree	Disagree	Agree	Agree	Disagree	Disagree	Agree	Agree	Agree	Strongly agree	Agree	Disagree	Agree	Agree	Disagree	Strongly agree	Strongly agree	Strongly disagree	Strongly agree
Auckland Region	Strongly disagree	Strongly disagree	Strongly disagree	Unsure/neutral	Strongly disagree	Strongly disagree	Agree	Strongly disagree	Agree	Agree	Agree	Agree	Strongly agree	Strongly disagree	Agree	Agree	Unsure/neutral	Agree	Unsure/neutral	Agree	Agree	Agree	Agree	Strongly agree	Agree	Strongly agree	Unsure/neutral	Strongly agree	Strongly agree	Strongly agree	Strongly agree	Strongly agree	Agree	Agree	Agree	Agree	Agree	Unsure/neutral	Agree	Unsure/neutral	Strongly agree	Agree	Agree	Agree	Agree	Agree	Strongly agree	Agree	Strongly agree
Auckland Region	Disagree	Agree	Strongly disagree	Disagree	Strongly disagree	Strongly disagree	Agree	Strongly disagree	Agree	Strongly disagree	Agree	Agree	Agree	Disagree	Strongly agree	Strongly agree	Disagree	Disagree	Agree	Strongly agree	Strongly agree	Strongly agree	Strongly agree	Strongly agree	Strongly agree	Strongly agree	Strongly agree	Strongly agree	Disagree	Agree	Strongly agree	Agree	Agree	Strongly agree	Agree	Strongly agree	Agree	Strongly agree	Agree	Agree	Strongly agree	Agree	Agree	Strongly agree	Disagree	Strongly agree	Strongly agree	Disagree	Strongly agree
Manawatu-Whanganui Region	Strongly disagree	Strongly disagree	Strongly disagree	Agree	Disagree	Agree	Unsure/neutral	Disagree	Unsure/neutral	Agree	Unsure/neutral	Agree	Strongly agree	Strongly disagree	Unsure/neutral	Unsure/neutral	Unsure/neutral	Unsure/neutral	Strongly agree	Unsure/neutral	Unsure/neutral	Agree	Unsure/neutral	Unsure/neutral	Unsure/neutral	Disagree	Disagree	Disagree	Disagree	Disagree	Disagree	Unsure/neutral	Disagree	Disagree	Unsure/neutral	Strongly disagree	Disagree	Disagree	Disagree	Disagree	Disagree	Disagree	Disagree	Disagree	Disagree	Unsure/neutral	Unsure/neutral	Unsure/neutral	Unsure/neutral
Auckland Region	Disagree	Agree	Strongly disagree	Disagree	Disagree	Strongly disagree	Agree	Disagree	Strongly agree	Disagree	Agree	Strongly agree	Disagree	Unsure/neutral	Strongly agree	Strongly agree	Unsure/neutral	Disagree	Unsure/neutral	Strongly agree	Strongly agree	Strongly agree	Agree	Strongly agree	Agree	Strongly agree	Agree	Agree	Disagree	Agree	Agree	Disagree	Disagree	Strongly agree	Disagree	Strongly agree	Disagree	Agree	Disagree	Agree	Strongly agree	Disagree	Unsure/neutral	Agree	Unsure/neutral	Strongly agree	Strongly agree	Disagree	Strongly agree
Auckland Region	Strongly disagree	Agree	Disagree	Strongly disagree	Disagree	Strongly disagree	Strongly agree	Strongly disagree	Unsure/neutral	Disagree	Strongly disagree	Disagree	Agree	Strongly disagree	Strongly agree	Strongly agree	Agree	Agree	Unsure/neutral	Strongly agree	Strongly agree	Strongly agree	Strongly agree	Strongly agree	Strongly agree	Agree	Strongly disagree	Strongly agree	Agree	Strongly agree	Strongly agree	Strongly disagree	Strongly agree	Strongly agree	Strongly disagree	Strongly agree	Strongly disagree	Strongly agree	Strongly disagree	Strongly agree	Strongly agree	Strongly disagree	Strongly agree	Strongly agree	Strongly disagree	Strongly agree	Strongly agree	Strongly disagree	Strongly agree
Northland Region	Disagree	Disagree	Strongly disagree	Disagree	Strongly disagree	Disagree	Agree	Strongly disagree	Disagree	Disagree	Strongly agree	Unsure/neutral	Agree	Strongly disagree	Agree	Agree	Strongly disagree	Disagree	Agree	Agree	Agree	Agree	Agree	Agree	Agree	Unsure/neutral	Agree	Agree	Agree	Agree	Agree	Agree	Agree	Agree	Agree	Unsure/neutral	Agree	Agree	Agree	Agree	Agree	Disagree	Agree	Agree	Disagree	Agree	Agree	Disagree	Agree
Taranaki Region	Strongly disagree	Unsure/neutral	Disagree	Agree	Strongly disagree	Strongly agree	Strongly agree	Strongly disagree	Agree	Disagree	Agree	Strongly agree	Agree	Strongly disagree	Strongly agree	Agree	Disagree	Agree	Agree	Strongly agree	Agree	Agree	Agree	Agree	Agree	Agree	Agree	Agree	Strongly agree	Agree	Agree	Agree	Unsure/neutral	Agree	Agree	Agree	Unsure/neutral	Agree	Disagree	Agree	Agree	Agree	Agree	Agree	Disagree	Agree	Agree	Disagree	Agree
Auckland Region	Strongly disagree	Disagree	Disagree	Disagree	Disagree	Disagree	Strongly agree	Disagree	Disagree	Disagree	Agree	Strongly agree	Strongly agree	Disagree	Agree	Agree	Disagree	Unsure/neutral	Agree	Agree	Agree	Agree	Agree	Agree	Agree	Agree	Agree	Agree	Agree	Agree	Agree	Agree	Agree	Agree	Unsure/neutral	Agree	Unsure/neutral	Agree	Agree	Agree	Agree	Disagree	Agree	Agree	Strongly disagree	Agree	Agree	Strongly disagree	Agree
Otago Region	Disagree	Agree	Unsure/neutral	Agree	Unsure/neutral	Unsure/neutral	Disagree	Agree	Agree	Disagree	Unsure/neutral	Agree	Unsure/neutral	Agree	Agree	Unsure/neutral	Agree	Unsure/neutral	Unsure/neutral	Unsure/neutral	Agree	Unsure/neutral	Unsure/neutral	Agree	Agree	Unsure/neutral	Unsure/neutral	Agree	Agree	Agree	Agree	Agree	Agree	Unsure/neutral	Agree	Agree	Agree	Strongly agree	Strongly agree	Strongly agree	Agree	Agree	Strongly agree	Strongly agree	Agree	Unsure/neutral	Unsure/neutral	Unsure/neutral	Unsure/neutral
Wellington Region	Strongly disagree	Disagree	Strongly disagree	Agree	Strongly disagree	Agree	Strongly agree	Strongly disagree	Strongly agree	Disagree	Agree	Agree	Agree	Strongly disagree	Agree	Agree	Unsure/neutral	Agree	Strongly agree	Agree	Strongly agree	Agree	Agree	Agree	Agree	Unsure/neutral	Disagree	Unsure/neutral	Disagree	Strongly disagree	Unsure/neutral	Strongly agree	Strongly disagree	Disagree	Strongly agree	Disagree	Strongly disagree	Strongly disagree	Strongly disagree	Strongly disagree	Disagree	Agree	Strongly disagree	Agree	Strongly agree	Agree	Agree	Unsure/neutral	Unsure/neutral
Auckland Region	Disagree	Disagree	Strongly disagree	Agree	Unsure/neutral	Strongly disagree	Agree	Disagree	Unsure/neutral	Disagree	Unsure/neutral	Agree	Agree	Disagree	Agree	Agree	Disagree	Disagree	Agree	Agree	Agree	Agree	Unsure/neutral	Agree	Agree	Unsure/neutral	Agree	Unsure/neutral	Agree	Agree	Unsure/neutral	Agree	Unsure/neutral	Unsure/neutral	Agree	Unsure/neutral	Unsure/neutral	Unsure/neutral	Unsure/neutral	Agree	Agree	Unsure/neutral	Agree	Agree	Disagree	Agree	Agree	Disagree	Agree
Northland Region	Strongly disagree	Unsure/neutral	Strongly disagree	Disagree	Strongly disagree	Disagree	Agree	Strongly disagree	Agree	Agree	Strongly agree	Agree	Agree	Disagree	Agree	Agree	Unsure/neutral	Disagree	Strongly agree	Strongly agree	Strongly agree	Strongly agree	Agree	Agree	Agree	Agree	Agree	Unsure/neutral	Agree	Unsure/neutral	Unsure/neutral	Agree	Unsure/neutral	Agree	Agree	Unsure/neutral	Unsure/neutral	Unsure/neutral	Unsure/neutral	Unsure/neutral	Agree	Unsure/neutral	Unsure/neutral	Agree	Agree	Agree	Agree	Disagree	Agree
Waikato Region	Disagree	Unsure/neutral	Disagree	Unsure/neutral	Strongly disagree	Agree	Unsure/neutral	Disagree	Agree	Disagree	Disagree	Agree	Disagree	Disagree	Strongly agree	Disagree	Strongly disagree	Strongly disagree	Disagree	Agree	Agree	Agree	Agree	Strongly agree	Agree	Agree	Strongly agree	Agree	Agree	Agree	Agree	Agree	Agree	Strongly agree	Unsure/neutral	Agree	Agree	Agree	Unsure/neutral	Agree	Agree	Disagree	Unsure/neutral	Agree	Disagree	Agree	Agree	Disagree	Agree
Manawatu-Whanganui Region	Strongly disagree	Disagree	Strongly disagree	Agree	Disagree	Unsure/neutral	Agree	Disagree	Agree	Unsure/neutral	Unsure/neutral	Agree	Agree	Strongly disagree	Unsure/neutral	Agree	Agree	Unsure/neutral	Strongly agree	Agree	Agree	Strongly disagree	Agree	Agree	Agree	Disagree	Agree	Strongly disagree	Strongly agree	Unsure/neutral	Unsure/neutral	Disagree	Agree	Disagree	Disagree	Strongly disagree	Strongly disagree	Disagree	Disagree	Unsure/neutral	Agree	Disagree	Unsure/neutral	Disagree	Disagree	Agree	Agree	Strongly disagree	Agree
Wellington Region	Strongly disagree	Disagree	Strongly disagree	Unsure/neutral	Strongly disagree	Disagree	Agree	Strongly disagree	Unsure/neutral	Strongly disagree	Agree	Unsure/neutral	Agree	Disagree	Agree	Unsure/neutral	Unsure/neutral	Unsure/neutral	Agree	Strongly agree	Agree	Agree	Strongly agree	Strongly agree	Strongly agree	Disagree	Unsure/neutral	Disagree	Unsure/neutral	Unsure/neutral	Agree	Agree	Agree	Unsure/neutral	Agree	Disagree	Disagree	Disagree	Disagree	Unsure/neutral	Agree	Disagree	Unsure/neutral	Unsure/neutral	Disagree	Agree	Agree	Disagree	Agree
Manawatu-Whanganui Region	Disagree	Disagree	Disagree	Unsure/neutral	Disagree	Disagree	Unsure/neutral	Disagree	Agree	Unsure/neutral	Agree	Unsure/neutral	Agree	Disagree	Unsure/neutral	Unsure/neutral	Agree	Unsure/neutral	Agree	Agree	Unsure/neutral	Unsure/neutral	Disagree	Unsure/neutral	Unsure/neutral	Unsure/neutral	Agree	Disagree	Unsure/neutral	Disagree	Unsure/neutral	Unsure/neutral	Agree	Unsure/neutral	Unsure/neutral	Disagree	Disagree	Strongly disagree	Unsure/neutral	Disagree	Disagree	Unsure/neutral	Agree	Disagree	Unsure/neutral	Disagree	Unsure/neutral	Unsure/neutral	Unsure/neutral
Auckland Region	Strongly disagree	Strongly disagree	Strongly disagree	Strongly disagree	Disagree	Strongly disagree	Agree	Strongly disagree	Unsure/neutral	Strongly disagree	Agree	Agree	Strongly agree	Strongly disagree	Strongly agree	Strongly agree	Disagree	Disagree	Agree	Strongly agree	Strongly agree	Agree	Agree	Agree	Agree	Unsure/neutral	Agree	Agree	Unsure/neutral	Agree	Agree	Strongly agree	Unsure/neutral	Agree	Strongly agree	Agree	Agree	Agree	Agree	Agree	Strongly agree	Disagree	Agree	Strongly agree	Disagree	Strongly agree	Strongly agree	Strongly disagree	Strongly agree
Wellington Region	Strongly disagree	Strongly disagree	Strongly disagree	Strongly disagree	Strongly disagree	Disagree	Strongly agree	Disagree	Agree	Disagree	Strongly agree	Agree	Agree	Strongly disagree	Strongly agree	Strongly agree	Disagree	Disagree	Strongly agree	Agree	Strongly agree	Agree	Strongly agree	Strongly agree	Agree	Agree	Strongly agree	Strongly agree	Agree	Agree	Strongly agree	Strongly agree	Unsure/neutral	Strongly agree	Agree	Agree	Agree	Agree	Agree	Unsure/neutral	Agree	Disagree	Unsure/neutral	Agree	Disagree	Agree	Strongly agree	Disagree	Strongly agree
Wellington Region	Strongly disagree	Unsure/neutral	Strongly disagree	Disagree	Strongly disagree	Agree	Strongly agree	Strongly disagree	Agree	Disagree	Agree	Strongly agree	Strongly agree	Strongly disagree	Disagree	Disagree	Agree	Agree	Strongly agree	Disagree	Disagree	Disagree	Disagree	Disagree	Strongly disagree	Strongly disagree	Strongly disagree	Strongly disagree	Disagree	Agree	Strongly disagree	Agree	Agree	Strongly disagree	Unsure/neutral	Strongly disagree	Strongly disagree	Strongly disagree	Strongly disagree	Agree	Strongly disagree	Unsure/neutral	Agree	Strongly disagree	Strongly disagree	Disagree	Disagree	Unsure/neutral	Strongly disagree
Waikato Region	Strongly disagree	Strongly disagree	Strongly disagree	Strongly disagree	Strongly disagree	Strongly disagree	Strongly agree	Strongly disagree	Strongly agree	Strongly disagree	Strongly agree	Strongly agree	Unsure/neutral	Strongly disagree	Strongly agree	Strongly agree	Disagree	Strongly disagree	Agree	Strongly agree	Strongly agree	Strongly agree	Strongly agree	Strongly agree	Strongly agree	Agree	Strongly agree	Strongly agree	Unsure/neutral	Agree	Strongly agree	Unsure/neutral	Agree	Strongly agree	Unsure/neutral	Unsure/neutral	Unsure/neutral	Agree	Agree	Agree	Agree	Disagree	Agree	Agree	Disagree	Strongly agree	Strongly agree	Strongly disagree	Agree
Northland Region	Strongly disagree	Disagree	Strongly disagree	Strongly disagree	Strongly disagree	Strongly disagree	Strongly disagree	Strongly disagree	Agree	Strongly disagree	Agree	Strongly agree	Agree	Strongly disagree	Strongly agree	Strongly agree	Disagree	Disagree	Agree	Strongly agree	Strongly agree	Strongly agree	Strongly agree	Strongly agree	Strongly agree	Strongly agree	Strongly agree	Agree	Strongly agree	Strongly agree	Strongly agree	Agree	Agree	Strongly agree	Disagree	Strongly agree	Agree	Strongly agree	Strongly agree	Strongly agree	Strongly agree	Strongly disagree	Agree	Strongly agree	Strongly disagree	Strongly agree	Strongly agree	Strongly disagree	Strongly agree
Otago Region	Strongly disagree	Unsure/neutral	Strongly disagree	Disagree	Disagree	Disagree	Agree	Strongly disagree	Agree	Agree	Agree	Agree	Strongly agree	Disagree	Agree	Agree	Disagree	Disagree	Strongly agree	Strongly agree	Agree	Agree	Agree	Strongly agree	Unsure/neutral	Agree	Agree	Unsure/neutral	Agree	Unsure/neutral	Agree	Strongly agree	Agree	Agree	Strongly agree	Agree	Agree	Unsure/neutral	Agree	Agree	Agree	Disagree	Disagree	Agree	Disagree	Strongly agree	Strongly agree	Disagree	Strongly agree
Wellington Region	Strongly disagree	Disagree	Strongly disagree	Agree	Disagree	Strongly disagree	Agree	Disagree	Unsure/neutral	Disagree	Agree	Agree	Unsure/neutral	Strongly disagree	Unsure/neutral	Agree	Agree	Agree	Agree	Agree	Agree	Agree	Unsure/neutral	Agree	Agree	Agree	Strongly disagree	Disagree	Unsure/neutral	Disagree	Unsure/neutral	Agree	Disagree	Agree	Disagree	Strongly disagree	Disagree	Unsure/neutral	Unsure/neutral	Strongly disagree	Unsure/neutral	Disagree	Strongly disagree	Unsure/neutral	Strongly disagree	Unsure/neutral	Agree	Disagree	Agree
Bay of Plenty Region	Disagree	Agree	Strongly disagree	Unsure/neutral	Disagree	Disagree	Agree	Strongly disagree	Agree	Unsure/neutral	Agree	Strongly agree	Strongly agree	Disagree	Strongly agree	Strongly agree	Disagree	Unsure/neutral	Agree	Strongly agree	Strongly agree	Strongly agree	Strongly agree	Strongly agree	Strongly agree	Strongly agree	Strongly agree	Strongly agree	Disagree	Agree	Strongly agree	Agree	Agree	Agree	Disagree	Agree	Agree	Strongly agree	Agree	Strongly agree	Strongly agree	Disagree	Strongly agree	Strongly agree	Disagree	Strongly agree	Strongly agree	Strongly agree	Strongly agree
Auckland Region	Strongly disagree	Disagree	Strongly disagree	Strongly disagree	Strongly disagree	Strongly disagree	Strongly agree	Strongly disagree	Unsure/neutral	Disagree	Strongly agree	Strongly agree	Strongly agree	Strongly disagree	Strongly agree	Agree	Disagree	Disagree	Disagree	Strongly agree	Strongly agree	Strongly agree	Strongly agree	Strongly agree	Strongly agree	Agree	Strongly agree	Agree	Unsure/neutral	Agree	Agree	Agree	Agree	Agree	Disagree	Unsure/neutral	Agree	Agree	Unsure/neutral	Agree	Strongly agree	Disagree	Agree	Agree	Disagree	Strongly agree	Strongly agree	Strongly disagree	Strongly agree
Otago Region	Strongly disagree	Disagree	Disagree	Agree	Disagree	Strongly disagree	Agree	Unsure/neutral	Agree	Disagree	Disagree	Agree	Agree	Strongly disagree	Disagree	Disagree	Agree	Agree	Agree	Strongly disagree	Disagree	Strongly disagree	Strongly disagree	Disagree	Strongly disagree	Disagree	Disagree	Strongly disagree	Disagree	Strongly disagree	Strongly disagree	Strongly disagree	Disagree	Strongly disagree	Strongly disagree	Strongly disagree	Disagree	Strongly disagree	Strongly disagree	Strongly disagree	Strongly disagree	Strongly disagree	Strongly disagree	Disagree	Strongly disagree	Strongly disagree	Strongly disagree	Strongly disagree	Strongly disagree
Hawke's Bay Region	Strongly disagree	Strongly disagree	Strongly disagree	Strongly disagree	Strongly disagree	Strongly disagree	Strongly disagree	Strongly disagree	Strongly disagree	Strongly disagree	Strongly agree	Agree	Agree	Strongly disagree	Strongly agree	Agree	Disagree	Strongly disagree	Strongly agree	Strongly agree	Strongly agree	Strongly agree	Strongly agree	Strongly agree	Strongly agree	Strongly agree	Strongly agree	Strongly agree	Strongly agree	Strongly agree	Strongly agree	Strongly agree	Strongly agree	Strongly agree	Strongly agree	Agree	Strongly agree	Strongly agree	Strongly disagree	Strongly agree	Strongly agree	Strongly disagree	Strongly agree	Strongly agree	Strongly disagree	Strongly agree	Strongly agree	Strongly disagree	Strongly agree
Auckland Region	Strongly disagree	Disagree	Strongly disagree	Strongly disagree	Disagree	Strongly disagree	Strongly agree	Disagree	Agree	Disagree	Agree	Agree	Agree	Disagree	Agree	Agree	Disagree	Disagree	Agree	Agree	Strongly agree	Agree	Agree	Agree	Agree	Unsure/neutral	Agree	Agree	Unsure/neutral	Agree	Agree	Agree	Agree	Agree	Agree	Unsure/neutral	Agree	Unsure/neutral	Agree	Agree	Agree	Agree	Agree	Unsure/neutral	Agree	Agree	Agree	Disagree	Agree
Auckland Region	Strongly disagree	Disagree	Strongly disagree	Unsure/neutral	Strongly disagree	Strongly disagree	Strongly agree	Disagree	Unsure/neutral	Unsure/neutral	Disagree	Unsure/neutral	Unsure/neutral	Strongly disagree	Unsure/neutral	Unsure/neutral	Agree	Agree	Agree	Unsure/neutral	Unsure/neutral	Disagree	Unsure/neutral	Unsure/neutral	Unsure/neutral	Disagree	Disagree	Disagree	Unsure/neutral	Disagree	Disagree	Disagree	Agree	Disagree	Disagree	Disagree	Disagree	Disagree	Disagree	Disagree	Disagree	Disagree	Disagree	Unsure/neutral	Disagree	Unsure/neutral	Unsure/neutral	Unsure/neutral	Unsure/neutral
Auckland Region	Unsure/neutral	Agree	Unsure/neutral	Agree	Agree	Agree	Agree	Agree	Unsure/neutral	Agree	Unsure/neutral	Agree	Unsure/neutral	Agree	Agree	Agree	Unsure/neutral	Agree	Agree	Unsure/neutral	Unsure/neutral	Unsure/neutral	Unsure/neutral	Agree	Agree	Unsure/neutral	Agree	Agree	Unsure/neutral	Agree	Unsure/neutral	Agree	Unsure/neutral	Unsure/neutral	Agree	Unsure/neutral	Unsure/neutral	Agree	Agree	Agree	Agree	Agree	Unsure/neutral	Unsure/neutral	Agree	Agree	Unsure/neutral	Agree	Unsure/neutral
Wellington Region	Strongly disagree	Unsure/neutral	Strongly disagree	Disagree	Strongly disagree	Strongly disagree	Strongly agree	Strongly disagree	Unsure/neutral	Strongly disagree	Agree	Unsure/neutral	Agree	Agree	Strongly agree	Agree	Disagree	Disagree	Unsure/neutral	Strongly agree	Strongly agree	Unsure/neutral	Strongly agree	Strongly agree	Agree	Unsure/neutral	Agree	Agree	Unsure/neutral	Unsure/neutral	Agree	Agree	Unsure/neutral	Agree	Unsure/neutral	Agree	Unsure/neutral	Agree	Unsure/neutral	Unsure/neutral	Agree	Agree	Agree	Strongly agree	Agree	Strongly agree	Strongly agree	Disagree	Strongly agree
Canterbury Region	Strongly disagree	Unsure/neutral	Unsure/neutral	Unsure/neutral	Unsure/neutral	Unsure/neutral	Unsure/neutral	Unsure/neutral	Unsure/neutral	Unsure/neutral	Unsure/neutral	Unsure/neutral	Unsure/neutral	Strongly disagree	Unsure/neutral	Unsure/neutral	Unsure/neutral	Unsure/neutral	Unsure/neutral	Unsure/neutral	Strongly disagree	Unsure/neutral	Unsure/neutral	Unsure/neutral	Unsure/neutral	Unsure/neutral	Unsure/neutral	Unsure/neutral	Unsure/neutral	Unsure/neutral	Unsure/neutral	Unsure/neutral	Unsure/neutral	Unsure/neutral	Unsure/neutral	Unsure/neutral	Unsure/neutral	Unsure/neutral	Unsure/neutral	Unsure/neutral	Unsure/neutral	Unsure/neutral	Unsure/neutral	Unsure/neutral	Unsure/neutral	Unsure/neutral	Unsure/neutral	Unsure/neutral	Unsure/neutral
Hawke's Bay Region	Strongly disagree	Strongly agree	Strongly disagree	Strongly disagree	Strongly disagree	Strongly disagree	Strongly agree	Strongly disagree	Strongly agree	Strongly disagree	Strongly agree	Agree	Strongly agree	Strongly disagree	Strongly agree	Unsure/neutral	Disagree	Disagree	Disagree	Agree	Agree	Agree	Agree	Agree	Agree	Unsure/neutral	Unsure/neutral	Agree	Unsure/neutral	Agree	Agree	Agree	Agree	Agree	Agree	Unsure/neutral	Disagree	Unsure/neutral	Unsure/neutral	Agree	Agree	Unsure/neutral	Unsure/neutral	Agree	Disagree	Agree	Agree	Disagree	Agree
Waikato Region	Disagree	Strongly agree	Unsure/neutral	Disagree	Disagree	Disagree	Agree	Strongly disagree	Unsure/neutral	Unsure/neutral	Disagree	Strongly agree	Strongly agree	Disagree	Agree	Strongly agree	Strongly agree	Strongly disagree	Strongly agree	Strongly agree	Strongly agree	Strongly agree	Strongly agree	Strongly agree	Strongly agree	Strongly agree	Agree	Agree	Agree	Strongly agree	Strongly agree	Agree	Agree	Strongly agree	Strongly agree	Strongly agree	Strongly agree	Strongly agree	Agree	Agree	Strongly agree	Agree	Agree	Strongly agree	Strongly agree	Unsure/neutral	Agree	Unsure/neutral	Unsure/neutral
Auckland Region	Strongly disagree	Strongly disagree	Strongly disagree	Agree	Unsure/neutral	Agree	Agree	Unsure/neutral	Agree	Disagree	Unsure/neutral	Agree	Strongly agree	Strongly disagree	Disagree	Disagree	Strongly agree	Strongly agree	Strongly agree	Disagree	Disagree	Unsure/neutral	Disagree	Unsure/neutral	Unsure/neutral	Unsure/neutral	Unsure/neutral	Unsure/neutral	Unsure/neutral	Unsure/neutral	Unsure/neutral	Unsure/neutral	Unsure/neutral	Unsure/neutral	Unsure/neutral	Unsure/neutral	Unsure/neutral	Unsure/neutral	Unsure/neutral	Unsure/neutral	Unsure/neutral	Unsure/neutral	Unsure/neutral	Unsure/neutral	Unsure/neutral	Unsure/neutral	Unsure/neutral	Unsure/neutral	Unsure/neutral
Waikato Region	Disagree	Disagree	Strongly disagree	Disagree	Disagree	Disagree	Agree	Disagree	Agree	Disagree	Agree	Agree	Agree	Disagree	Agree	Agree	Disagree	Unsure/neutral	Agree	Agree	Agree	Disagree	Unsure/neutral	Unsure/neutral	Disagree	Unsure/neutral	Agree	Unsure/neutral	Agree	Unsure/neutral	Unsure/neutral	Disagree	Unsure/neutral	Unsure/neutral	Disagree	Disagree	Unsure/neutral	Unsure/neutral	Disagree	Unsure/neutral	Unsure/neutral	Disagree	Unsure/neutral	Unsure/neutral	Disagree	Agree	Agree	Disagree	Agree
Otago Region	Strongly disagree	Strongly disagree	Strongly disagree	Disagree	Strongly disagree	Strongly disagree	Strongly agree	Strongly disagree	Unsure/neutral	Strongly disagree	Agree	Strongly agree	Strongly agree	Strongly disagree	Strongly agree	Strongly agree	Strongly disagree	Strongly disagree	Agree	Strongly agree	Strongly agree	Strongly agree	Strongly agree	Strongly agree	Strongly agree	Strongly agree	Strongly agree	Strongly agree	Agree	Strongly agree	Strongly agree	Unsure/neutral	Strongly agree	Strongly agree	Disagree	Agree	Agree	Strongly agree	Agree	Strongly agree	Strongly agree	Disagree	Agree	Strongly agree	Disagree	Strongly agree	Strongly agree	Strongly disagree	Strongly agree
Waikato Region	Disagree	Disagree	Strongly disagree	Disagree	Disagree	Disagree	Agree	Disagree	Agree	Disagree	Unsure/neutral	Agree	Agree	Disagree	Agree	Agree	Unsure/neutral	Agree	Agree	Agree	Agree	Agree	Agree	Agree	Agree	Unsure/neutral	Unsure/neutral	Agree	Unsure/neutral	Agree	Agree	Agree	Agree	Agree	Agree	Agree	Disagree	Agree	Disagree	Unsure/neutral	Agree	Disagree	Unsure/neutral	Agree	Unsure/neutral	Agree	Agree	Disagree	Agree
Canterbury Region	Strongly disagree	Disagree	Strongly disagree	Strongly agree	Disagree	Disagree	Agree	Disagree	Strongly agree	Unsure/neutral	Disagree	Disagree	Disagree	Disagree	Unsure/neutral	Unsure/neutral	Unsure/neutral	Agree	Agree	Agree	Unsure/neutral	Disagree	Unsure/neutral	Unsure/neutral	Unsure/neutral	Unsure/neutral	Unsure/neutral	Unsure/neutral	Unsure/neutral	Unsure/neutral	Unsure/neutral	Agree	Disagree	Unsure/neutral	Agree	Unsure/neutral	Unsure/neutral	Unsure/neutral	Unsure/neutral	Unsure/neutral	Agree	Disagree	Unsure/neutral	Unsure/neutral	Disagree	Unsure/neutral	Unsure/neutral	Unsure/neutral	Agree
Otago Region	Strongly disagree	Strongly disagree	Strongly disagree	Strongly disagree	Disagree	Strongly disagree	Unsure/neutral	Strongly disagree	Unsure/neutral	Strongly disagree	Strongly disagree	Agree	Agree	Strongly disagree	Strongly agree	Strongly agree	Strongly disagree	Strongly disagree	Unsure/neutral	Strongly agree	Strongly agree	Agree	Strongly agree	Strongly agree	Strongly agree	Strongly agree	Strongly agree	Strongly agree	Agree	Strongly agree	Strongly agree	Strongly agree	Strongly agree	Strongly agree	Agree	Strongly agree	Agree	Strongly agree	Agree	Agree	Strongly agree	Strongly disagree	Agree	Strongly agree	Strongly disagree	Strongly agree	Strongly agree	Strongly disagree	Strongly agree
Bay of Plenty Region	Disagree	Disagree	Strongly disagree	Disagree	Strongly disagree	Disagree	Agree	Disagree	Agree	Disagree	Agree	Agree	Agree	Disagree	Strongly agree	Agree	Strongly disagree	Strongly disagree	Disagree	Agree	Agree	Agree	Strongly agree	Strongly agree	Agree	Agree	Strongly agree	Strongly agree	Strongly agree	Agree	Strongly agree	Agree	Agree	Agree	Agree	Agree	Agree	Agree	Agree	Agree	Agree	Disagree	Agree	Agree	Disagree	Strongly agree	Agree	Strongly disagree	Strongly agree
Waikato Region	Strongly disagree	Disagree	Strongly disagree	Strongly disagree	Disagree	Disagree	Agree	Disagree	Agree	Strongly disagree	Strongly agree	Agree	Agree	Disagree	Strongly agree	Strongly agree	Unsure/neutral	Disagree	Disagree	Strongly agree	Strongly agree	Agree	Strongly agree	Strongly agree	Strongly agree	Strongly agree	Agree	Agree	Unsure/neutral	Unsure/neutral	Agree	Disagree	Agree	Strongly agree	Disagree	Agree	Unsure/neutral	Strongly agree	Agree	Agree	Agree	Disagree	Agree	Agree	Disagree	Strongly agree	Strongly agree	Strongly disagree	Strongly agree
Wellington Region	Strongly disagree	Disagree	Strongly disagree	Strongly disagree	Strongly disagree	Strongly disagree	Strongly agree	Strongly disagree	Agree	Strongly disagree	Strongly agree	Agree	Unsure/neutral	Strongly disagree	Agree	Strongly agree	Disagree	Disagree	Disagree	Strongly agree	Strongly agree	Strongly agree	Strongly agree	Strongly agree	Strongly agree	Agree	Agree	Unsure/neutral	Unsure/neutral	Agree	Strongly agree	Disagree	Agree	Strongly agree	Disagree	Agree	Agree	Unsure/neutral	Unsure/neutral	Agree	Agree	Strongly disagree	Agree	Agree	Disagree	Agree	Agree	Strongly disagree	Agree
Auckland Region	Strongly disagree	Unsure/neutral	Strongly disagree	Agree	Strongly disagree	Agree	Agree	Disagree	Agree	Unsure/neutral	Unsure/neutral	Agree	Strongly agree	Disagree	Strongly agree	Agree	Unsure/neutral	Unsure/neutral	Strongly agree	Strongly agree	Agree	Agree	Agree	Strongly agree	Agree	Agree	Agree	Agree	Unsure/neutral	Disagree	Strongly agree	Unsure/neutral	Unsure/neutral	Strongly agree	Unsure/neutral	Unsure/neutral	Unsure/neutral	Strongly agree	Unsure/neutral	Agree	Agree	Disagree	Agree	Agree	Disagree	Strongly agree	Strongly agree	Strongly disagree	Strongly agree
Auckland Region	Disagree	Disagree	Strongly disagree	Disagree	Disagree	Disagree	Agree	Disagree	Agree	Disagree	Unsure/neutral	Agree	Agree	Disagree	Agree	Agree	Disagree	Disagree	Unsure/neutral	Agree	Agree	Agree	Agree	Agree	Agree	Unsure/neutral	Agree	Unsure/neutral	Unsure/neutral	Strongly disagree	Agree	Unsure/neutral	Strongly disagree	Unsure/neutral	Unsure/neutral	Unsure/neutral	Unsure/neutral	Unsure/neutral	Unsure/neutral	Strongly disagree	Agree	Disagree	Strongly disagree	Unsure/neutral	Disagree	Agree	Agree	Disagree	Agree
Hawke's Bay Region	Strongly disagree	Unsure/neutral	Disagree	Agree	Disagree	Strongly agree	Strongly agree	Unsure/neutral	Agree	Agree	Disagree	Unsure/neutral	Agree	Disagree	Agree	Agree	Agree	Agree	Agree	Unsure/neutral	Agree	Unsure/neutral	Disagree	Agree	Agree	Unsure/neutral	Disagree	Disagree	Agree	Unsure/neutral	Unsure/neutral	Agree	Unsure/neutral	Disagree	Agree	Disagree	Disagree	Disagree	Unsure/neutral	Disagree	Disagree	Disagree	Unsure/neutral	Disagree	Unsure/neutral	Unsure/neutral	Disagree	Unsure/neutral	Disagree
Bay of Plenty Region	Strongly disagree	Unsure/neutral	Strongly disagree	Disagree	Strongly disagree	Strongly disagree	Strongly agree	Strongly disagree	Unsure/neutral	Strongly disagree	Agree	Agree	Agree	Strongly disagree	Agree	Strongly agree	Disagree	Disagree	Agree	Strongly agree	Strongly agree	Strongly agree	Strongly agree	Strongly agree	Strongly agree	Strongly agree	Agree	Agree	Disagree	Strongly agree	Strongly agree	Strongly agree	Agree	Strongly agree	Strongly agree	Unsure/neutral	Disagree	Agree	Disagree	Agree	Agree	Disagree	Agree	Agree	Agree	Agree	Agree	Disagree	Agree
Auckland Region	Strongly disagree	Strongly disagree	Strongly disagree	Disagree	Disagree	Strongly disagree	Agree	Strongly disagree	Agree	Strongly disagree	Disagree	Agree	Unsure/neutral	Strongly disagree	Strongly agree	Strongly agree	Unsure/neutral	Unsure/neutral	Agree	Strongly agree	Strongly agree	Strongly agree	Strongly agree	Strongly agree	Disagree	Strongly agree	Strongly agree	Strongly agree	Strongly agree	Agree	Strongly agree	Strongly agree	Agree	Strongly agree	Strongly agree	Strongly agree	Strongly agree	Strongly agree	Strongly agree	Agree	Strongly agree	Strongly disagree	Agree	Strongly agree	Strongly disagree	Strongly agree	Strongly agree	Strongly disagree	Strongly agree
Otago Region	Strongly disagree	Strongly disagree	Strongly disagree	Unsure/neutral	Disagree	Disagree	Agree	Strongly disagree	Unsure/neutral	Agree	Unsure/neutral	Unsure/neutral	Unsure/neutral	Strongly disagree	Agree	Unsure/neutral	Unsure/neutral	Unsure/neutral	Agree	Agree	Strongly agree	Strongly agree	Strongly agree	Strongly agree	Strongly agree	Unsure/neutral	Strongly agree	Unsure/neutral	Agree	Agree	Agree	Strongly agree	Agree	Unsure/neutral	Strongly agree	Unsure/neutral	Agree	Unsure/neutral	Agree	Agree	Agree	Disagree	Unsure/neutral	Unsure/neutral	Disagree	Strongly agree	Strongly agree	Strongly disagree	Strongly agree
Auckland Region	Strongly disagree	Strongly disagree	Strongly disagree	Disagree	Strongly disagree	Strongly disagree	Agree	Strongly disagree	Agree	Strongly disagree	Agree	Agree	Unsure/neutral	Strongly disagree	Agree	Agree	Strongly disagree	Disagree	Strongly agree	Agree	Strongly agree	Strongly agree	Strongly agree	Strongly agree	Strongly agree	Strongly agree	Strongly agree	Agree	Strongly agree	Agree	Strongly agree	Agree	Unsure/neutral	Strongly agree	Disagree	Strongly agree	Unsure/neutral	Agree	Unsure/neutral	Unsure/neutral	Strongly agree	Disagree	Unsure/neutral	Strongly agree	Disagree	Strongly agree	Strongly agree	Strongly disagree	Strongly agree
Hawke's Bay Region	Strongly disagree	Disagree	Strongly disagree	Strongly disagree	Strongly disagree	Strongly disagree	Strongly agree	Strongly disagree	Agree	Strongly disagree	Strongly agree	Agree	Strongly agree	Disagree	Strongly agree	Strongly agree	Disagree	Strongly disagree	Strongly disagree	Strongly agree	Strongly agree	Strongly agree	Strongly agree	Strongly agree	Strongly agree	Strongly agree	Strongly agree	Strongly agree	Agree	Strongly agree	Strongly agree	Strongly agree	Strongly agree	Strongly agree	Strongly agree	Strongly agree	Strongly agree	Strongly agree	Strongly agree	Strongly agree	Strongly agree	Strongly disagree	Strongly agree	Strongly agree	Strongly disagree	Strongly agree	Strongly agree	Strongly disagree	Strongly agree
West Coast Region	Strongly disagree	Disagree	Strongly disagree	Disagree	Strongly disagree	Strongly disagree	Strongly agree	Strongly disagree	Agree	Strongly disagree	Strongly agree	Unsure/neutral	Strongly agree	Strongly disagree	Strongly agree	Strongly agree	Disagree	Disagree	Strongly agree	Strongly agree	Strongly agree	Strongly agree	Strongly agree	Strongly agree	Strongly agree	Agree	Agree	Strongly agree	Agree	Agree	Agree	Unsure/neutral	Strongly agree	Strongly agree	Unsure/neutral	Agree	Unsure/neutral	Agree	Unsure/neutral	Agree	Agree	Strongly disagree	Agree	Agree	Strongly disagree	Strongly agree	Strongly agree	Strongly disagree	Strongly agree
Auckland Region	Unsure/neutral	Unsure/neutral	Unsure/neutral	Unsure/neutral	Agree	Unsure/neutral	Agree	Unsure/neutral	Agree	Agree	Unsure/neutral	Agree	Unsure/neutral	Agree	Agree	Agree	Agree	Agree	Agree	Agree	Unsure/neutral	Agree	Agree	Agree	Agree	Agree	Agree	Agree	Agree	Agree	Agree	Agree	Agree	Agree	Agree	Disagree	Strongly disagree	Strongly disagree	Disagree	Strongly disagree	Strongly disagree	Unsure/neutral	Disagree	Strongly disagree	Strongly disagree	Disagree	Disagree	Unsure/neutral	Disagree
Wellington Region	Strongly disagree	Strongly disagree	Strongly disagree	Strongly disagree	Strongly disagree	Strongly disagree	Agree	Strongly disagree	Agree	Strongly disagree	Agree	Strongly agree	Agree	Disagree	Agree	Agree	Agree	Disagree	Agree	Strongly agree	Agree	Agree	Agree	Strongly agree	Agree	Agree	Strongly agree	Agree	Agree	Agree	Strongly agree	Unsure/neutral	Agree	Agree	Unsure/neutral	Agree	Agree	Agree	Agree	Agree	Agree	Agree	Agree	Agree	Unsure/neutral	Agree	Agree	Disagree	Agree
Canterbury Region	Strongly disagree	Strongly disagree	Strongly disagree	Strongly disagree	Strongly disagree	Strongly disagree	Strongly agree	Strongly disagree	Strongly agree	Strongly disagree	Agree	Unsure/neutral	Strongly agree	Strongly disagree	Strongly agree	Strongly agree	Disagree	Disagree	Agree	Strongly agree	Agree	Agree	Strongly agree	Strongly agree	Strongly agree	Agree	Agree	Agree	Agree	Disagree	Agree	Strongly agree	Disagree	Agree	Disagree	Agree	Unsure/neutral	Strongly agree	Disagree	Strongly agree	Strongly agree	Strongly disagree	Agree	Agree	Strongly disagree	Strongly agree	Strongly agree	Strongly disagree	Strongly agree
Taranaki Region	Strongly disagree	Strongly disagree	Strongly disagree	Strongly disagree	Strongly disagree	Strongly disagree	Strongly agree	Strongly disagree	Strongly agree	Strongly disagree	Agree	Agree	Agree	Strongly disagree	Strongly agree	Strongly agree	Disagree	Agree	Agree	Strongly agree	Strongly agree	Strongly agree	Strongly agree	Strongly agree	Strongly agree	Strongly agree	Strongly agree	Strongly agree	Agree	Agree	Strongly agree	Agree	Strongly agree	Strongly agree	Strongly agree	Strongly agree	Strongly agree	Strongly agree	Strongly agree	Strongly agree	Strongly agree	Strongly agree	Strongly agree	Strongly agree	Unsure/neutral	Strongly agree	Strongly agree	Strongly disagree	Strongly agree
Auckland Region	Strongly disagree	Disagree	Strongly disagree	Strongly disagree	Strongly disagree	Strongly disagree	Strongly agree	Strongly disagree	Unsure/neutral	Strongly disagree	Strongly agree	Unsure/neutral	Agree	Strongly disagree	Strongly agree	Agree	Disagree	Disagree	Strongly agree	Strongly agree	Strongly agree	Agree	Strongly agree	Strongly agree	Strongly agree	Agree	Agree	Agree	Strongly agree	Unsure/neutral	Agree	Disagree	Unsure/neutral	Agree	Disagree	Strongly agree	Strongly agree	Agree	Strongly agree	Unsure/neutral	Strongly agree	Strongly disagree	Disagree	Strongly agree	Strongly disagree	Strongly agree	Strongly agree	Strongly disagree	Strongly agree
Wellington Region	Disagree	Disagree	Strongly disagree	Disagree	Disagree	Disagree	Agree	Disagree	Agree	Disagree	Agree	Agree	Agree	Disagree	Agree	Agree	Disagree	Disagree	Agree	Agree	Agree	Agree	Agree	Agree	Agree	Strongly agree	Agree	Agree	Agree	Agree	Strongly agree	Agree	Agree	Strongly agree	Agree	Agree	Agree	Agree	Agree	Agree	Agree	Agree	Agree	Agree	Agree	Agree	Agree	Disagree	Agree
Auckland Region	Unsure/neutral	Agree	Strongly agree	Agree	Agree	Agree	Strongly agree	Unsure/neutral	Agree	Agree	Strongly agree	Strongly agree	Agree	Agree	Agree	Agree	Strongly agree	Strongly agree	Unsure/neutral	Strongly agree	Unsure/neutral	Agree	Agree	Strongly agree	Strongly agree	Agree	Agree	Agree	Agree	Unsure/neutral	Unsure/neutral	Agree	Agree	Agree	Unsure/neutral	Agree	Unsure/neutral	Agree	Unsure/neutral	Agree	Unsure/neutral	Agree	Agree	Agree	Agree	Unsure/neutral	Unsure/neutral	Agree	Agree
Auckland Region	Strongly disagree	Disagree	Strongly disagree	Disagree	Disagree	Disagree	Agree	Disagree	Disagree	Unsure/neutral	Agree	Unsure/neutral	Agree	Disagree	Agree	Agree	Disagree	Disagree	Agree	Agree	Agree	Agree	Agree	Agree	Agree	Unsure/neutral	Agree	Agree	Agree	Unsure/neutral	Agree	Agree	Agree	Agree	Agree	Unsure/neutral	Agree	Unsure/neutral	Unsure/neutral	Unsure/neutral	Agree	Agree	Unsure/neutral	Agree	Agree	Agree	Agree	Disagree	Agree
Northland Region	Strongly disagree	Disagree	Strongly disagree	Strongly disagree	Strongly disagree	Strongly disagree	Strongly agree	Strongly disagree	Agree	Strongly disagree	Agree	Agree	Strongly agree	Strongly disagree	Strongly agree	Strongly agree	Unsure/neutral	Strongly disagree	Strongly agree	Strongly agree	Strongly agree	Strongly agree	Strongly agree	Strongly agree	Agree	Agree	Agree	Agree	Agree	Strongly disagree	Strongly agree	Strongly disagree	Agree	Strongly agree	Strongly agree	Strongly agree	Agree	Agree	Agree	Agree	Strongly agree	Strongly disagree	Agree	Strongly agree	Strongly agree	Strongly agree	Strongly agree	Strongly disagree	Strongly agree
Auckland Region	Disagree	Unsure/neutral	Unsure/neutral	Agree	Disagree	Unsure/neutral	Strongly agree	Unsure/neutral	Agree	Disagree	Unsure/neutral	Disagree	Unsure/neutral	Agree	Agree	Agree	Strongly agree	Agree	Agree	Strongly agree	Strongly agree	Strongly agree	Strongly agree	Strongly agree	Strongly agree	Agree	Agree	Disagree	Unsure/neutral	Unsure/neutral	Strongly agree	Unsure/neutral	Agree	Unsure/neutral	Unsure/neutral	Agree	Unsure/neutral	Unsure/neutral	Agree	Agree	Unsure/neutral	Agree	Unsure/neutral	Unsure/neutral	Strongly agree	Strongly agree	Agree	Agree	Agree
Waikato Region	Strongly disagree	Strongly disagree	Strongly disagree	Disagree	Disagree	Disagree	Strongly agree	Strongly disagree	Strongly agree	Disagree	Disagree	Agree	Agree	Disagree	Agree	Agree	Disagree	Disagree	Agree	Agree	Agree	Agree	Strongly agree	Strongly agree	Strongly agree	Agree	Agree	Agree	Agree	Strongly agree	Agree	Strongly agree	Strongly agree	Agree	Strongly agree	Unsure/neutral	Agree	Agree	Agree	Agree	Agree	Agree	Agree	Agree	Agree	Agree	Agree	Strongly disagree	Agree
Bay of Plenty Region	Strongly disagree	Disagree	Strongly disagree	Strongly disagree	Strongly disagree	Strongly disagree	Strongly agree	Strongly disagree	Agree	Strongly disagree	Strongly agree	Strongly agree	Strongly agree	Strongly disagree	Agree	Strongly agree	Disagree	Disagree	Strongly agree	Strongly agree	Strongly agree	Strongly agree	Strongly agree	Strongly agree	Strongly agree	Agree	Strongly agree	Strongly agree	Strongly agree	Strongly agree	Strongly agree	Strongly agree	Strongly agree	Strongly agree	Unsure/neutral	Agree	Agree	Agree	Agree	Strongly agree	Agree	Disagree	Strongly agree	Strongly agree	Disagree	Strongly agree	Strongly agree	Strongly disagree	Strongly agree
Waikato Region	Strongly disagree	Disagree	Strongly disagree	Strongly disagree	Strongly disagree	Strongly disagree	Strongly agree	Strongly disagree	Unsure/neutral	Strongly disagree	Unsure/neutral	Agree	Agree	Strongly disagree	Agree	Unsure/neutral	Strongly disagree	Disagree	Unsure/neutral	Strongly agree	Strongly agree	Strongly agree	Strongly agree	Strongly agree	Strongly agree	Agree	Agree	Agree	Unsure/neutral	Agree	Agree	Disagree	Unsure/neutral	Agree	Unsure/neutral	Strongly agree	Unsure/neutral	Unsure/neutral	Unsure/neutral	Agree	Agree	Disagree	Agree	Agree	Disagree	Agree	Strongly agree	Strongly disagree	Strongly agree
Auckland Region	Strongly disagree	Disagree	Strongly disagree	Disagree	Disagree	Disagree	Agree	Disagree	Disagree	Disagree	Unsure/neutral	Strongly agree	Strongly agree	Disagree	Agree	Agree	Unsure/neutral	Unsure/neutral	Agree	Strongly agree	Strongly agree	Strongly agree	Strongly agree	Strongly agree	Strongly agree	Agree	Agree	Unsure/neutral	Unsure/neutral	Unsure/neutral	Agree	Agree	Agree	Unsure/neutral	Agree	Agree	Unsure/neutral	Agree	Disagree	Agree	Agree	Disagree	Agree	Agree	Agree	Agree	Agree	Disagree	Agree
Auckland Region	Strongly disagree	Disagree	Strongly disagree	Unsure/neutral	Strongly disagree	Disagree	Strongly agree	Strongly disagree	Agree	Strongly agree	Agree	Agree	Unsure/neutral	Disagree	Agree	Agree	Unsure/neutral	Agree	Agree	Agree	Agree	Agree	Agree	Strongly agree	Agree	Unsure/neutral	Unsure/neutral	Unsure/neutral	Disagree	Strongly agree	Agree	Unsure/neutral	Unsure/neutral	Agree	Strongly agree	Disagree	Disagree	Strongly disagree	Disagree	Agree	Disagree	Disagree	Unsure/neutral	Disagree	Agree	Agree	Unsure/neutral	Unsure/neutral	Agree
Auckland Region	Strongly disagree	Disagree	Unsure/neutral	Agree	Strongly disagree	Strongly agree	Disagree	Strongly disagree	Strongly agree	Strongly disagree	Strongly disagree	Agree	Unsure/neutral	Strongly disagree	Unsure/neutral	Unsure/neutral	Strongly disagree	Disagree	Agree	Unsure/neutral	Agree	Strongly agree	Agree	Strongly agree	Unsure/neutral	Strongly agree	Strongly disagree	Unsure/neutral	Disagree	Agree	Strongly agree	Disagree	Unsure/neutral	Strongly agree	Strongly disagree	Agree	Agree	Unsure/neutral	Agree	Strongly agree	Agree	Strongly agree	Agree	Agree	Unsure/neutral	Strongly agree	Strongly agree	Strongly disagree	Strongly agree
Canterbury Region	Disagree	Disagree	Disagree	Agree	Disagree	Disagree	Agree	Disagree	Disagree	Unsure/neutral	Agree	Disagree	Disagree	Disagree	Agree	Agree	Unsure/neutral	Disagree	Agree	Agree	Agree	Agree	Agree	Agree	Agree	Unsure/neutral	Agree	Unsure/neutral	Unsure/neutral	Unsure/neutral	Agree	Unsure/neutral	Unsure/neutral	Unsure/neutral	Unsure/neutral	Unsure/neutral	Unsure/neutral	Agree	Unsure/neutral	Disagree	Agree	Unsure/neutral	Unsure/neutral	Agree	Unsure/neutral	Agree	Agree	Disagree	Agree
Auckland Region	Strongly disagree	Unsure/neutral	Strongly disagree	Disagree	Strongly disagree	Strongly disagree	Strongly agree	Strongly disagree	Agree	Disagree	Unsure/neutral	Agree	Agree	Strongly disagree	Strongly agree	Strongly agree	Disagree	Strongly disagree	Agree	Strongly agree	Strongly agree	Strongly agree	Strongly agree	Strongly agree	Strongly agree	Strongly agree	Agree	Strongly agree	Agree	Strongly agree	Strongly agree	Agree	Agree	Strongly agree	Strongly agree	Strongly agree	Agree	Strongly agree	Unsure/neutral	Strongly agree	Strongly agree	Disagree	Strongly agree	Strongly agree	Disagree	Strongly agree	Strongly agree	Strongly disagree	Strongly agree
Auckland Region	Disagree	Unsure/neutral	Strongly disagree	Strongly disagree	Disagree	Disagree	Agree	Disagree	Unsure/neutral	Unsure/neutral	Strongly agree	Agree	Agree	Disagree	Strongly agree	Agree	Disagree	Agree	Agree	Strongly agree	Strongly agree	Agree	Agree	Strongly agree	Unsure/neutral	Agree	Agree	Agree	Unsure/neutral	Agree	Strongly agree	Disagree	Unsure/neutral	Strongly agree	Unsure/neutral	Agree	Strongly agree	Agree	Unsure/neutral	Unsure/neutral	Agree	Disagree	Agree	Strongly agree	Disagree	Agree	Strongly agree	Disagree	Strongly agree
Wellington Region	Strongly disagree	Disagree	Strongly disagree	Agree	Strongly disagree	Disagree	Agree	Strongly disagree	Agree	Unsure/neutral	Agree	Disagree	Agree	Strongly disagree	Unsure/neutral	Unsure/neutral	Unsure/neutral	Agree	Strongly agree	Agree	Agree	Agree	Agree	Agree	Unsure/neutral	Unsure/neutral	Disagree	Strongly disagree	Strongly agree	Agree	Disagree	Agree	Unsure/neutral	Unsure/neutral	Strongly agree	Unsure/neutral	Agree	Agree	Agree	Disagree	Unsure/neutral	Disagree	Disagree	Unsure/neutral	Agree	Agree	Agree	Disagree	Agree
Canterbury Region	Strongly disagree	Disagree	Strongly disagree	Unsure/neutral	Disagree	Agree	Strongly agree	Strongly disagree	Unsure/neutral	Unsure/neutral	Unsure/neutral	Agree	Strongly agree	Strongly disagree	Unsure/neutral	Agree	Unsure/neutral	Unsure/neutral	Unsure/neutral	Agree	Agree	Agree	Agree	Agree	Agree	Unsure/neutral	Unsure/neutral	Disagree	Agree	Disagree	Unsure/neutral	Agree	Unsure/neutral	Unsure/neutral	Agree	Unsure/neutral	Unsure/neutral	Disagree	Disagree	Unsure/neutral	Unsure/neutral	Unsure/neutral	Unsure/neutral	Unsure/neutral	Disagree	Agree	Agree	Disagree	Agree
Manawatu-Whanganui Region	Strongly agree	Unsure/neutral	Strongly agree	Agree	Strongly agree	Disagree	Strongly agree	Strongly agree	Unsure/neutral	Strongly agree	Strongly agree	Agree	Disagree	Strongly agree	Agree	Agree	Unsure/neutral	Disagree	Agree	Agree	Agree	Agree	Agree	Agree	Agree	Agree	Agree	Agree	Agree	Agree	Agree	Unsure/neutral	Agree	Agree	Agree	Agree	Unsure/neutral	Agree	Unsure/neutral	Agree	Agree	Disagree	Unsure/neutral	Agree	Disagree	Agree	Agree	Disagree	Agree
Canterbury Region	Disagree	Disagree	Disagree	Disagree	Agree	Disagree	Agree	Disagree	Agree	Unsure/neutral	Unsure/neutral	Unsure/neutral	Unsure/neutral	Disagree	Disagree	Unsure/neutral	Unsure/neutral	Unsure/neutral	Unsure/neutral	Agree	Agree	Unsure/neutral	Unsure/neutral	Agree	Agree	Unsure/neutral	Unsure/neutral	Unsure/neutral	Unsure/neutral	Unsure/neutral	Unsure/neutral	Unsure/neutral	Unsure/neutral	Unsure/neutral	Unsure/neutral	Unsure/neutral	Unsure/neutral	Unsure/neutral	Unsure/neutral	Unsure/neutral	Unsure/neutral	Unsure/neutral	Unsure/neutral	Unsure/neutral	Unsure/neutral	Unsure/neutral	Unsure/neutral	Unsure/neutral	Unsure/neutral
Waikato Region	Disagree	Disagree	Disagree	Agree	Disagree	Agree	Unsure/neutral	Disagree	Unsure/neutral	Agree	Disagree	Disagree	Unsure/neutral	Disagree	Disagree	Unsure/neutral	Unsure/neutral	Agree	Agree	Unsure/neutral	Unsure/neutral	Unsure/neutral	Disagree	Unsure/neutral	Disagree	Disagree	Unsure/neutral	Disagree	Unsure/neutral	Unsure/neutral	Disagree	Unsure/neutral	Unsure/neutral	Disagree	Agree	Strongly disagree	Disagree	Strongly disagree	Disagree	Unsure/neutral	Strongly disagree	Unsure/neutral	Unsure/neutral	Strongly disagree	Disagree	Strongly disagree	Strongly disagree	Strongly agree	Strongly disagree
Canterbury Region	Strongly disagree	Strongly disagree	Strongly disagree	Agree	Disagree	Disagree	Agree	Strongly disagree	Agree	Disagree	Disagree	Disagree	Agree	Strongly disagree	Agree	Agree	Disagree	Disagree	Agree	Strongly agree	Agree	Agree	Agree	Agree	Agree	Disagree	Agree	Unsure/neutral	Strongly agree	Agree	Agree	Agree	Agree	Agree	Agree	Unsure/neutral	Agree	Unsure/neutral	Agree	Agree	Agree	Agree	Agree	Agree	Agree	Agree	Agree	Disagree	Agree
Auckland Region	Strongly disagree	Strongly disagree	Strongly disagree	Strongly disagree	Strongly disagree	Strongly disagree	Strongly agree	Strongly disagree	Strongly agree	Strongly disagree	Strongly agree	Agree	Agree	Strongly disagree	Strongly agree	Agree	Disagree	Unsure/neutral	Agree	Strongly agree	Strongly agree	Strongly agree	Strongly agree	Strongly agree	Strongly agree	Agree	Agree	Agree	Unsure/neutral	Strongly agree	Strongly agree	Agree	Agree	Agree	Strongly agree	Strongly agree	Agree	Strongly agree	Unsure/neutral	Agree	Strongly agree	Disagree	Agree	Strongly agree	Disagree	Strongly agree	Strongly agree	Disagree	Strongly agree
Auckland Region	Strongly disagree	Disagree	Disagree	Agree	Strongly disagree	Strongly disagree	Strongly agree	Disagree	Agree	Agree	Unsure/neutral	Agree	Agree	Strongly disagree	Disagree	Unsure/neutral	Disagree	Agree	Agree	Unsure/neutral	Agree	Agree	Agree	Strongly agree	Agree	Unsure/neutral	Unsure/neutral	Disagree	Agree	Disagree	Unsure/neutral	Agree	Unsure/neutral	Unsure/neutral	Agree	Disagree	Disagree	Strongly disagree	Unsure/neutral	Disagree	Agree	Unsure/neutral	Unsure/neutral	Disagree	Agree	Agree	Agree	Disagree	Agree
Auckland Region	Strongly disagree	Strongly disagree	Strongly disagree	Unsure/neutral	Strongly disagree	Disagree	Strongly agree	Strongly disagree	Agree	Disagree	Agree	Agree	Strongly agree	Strongly disagree	Disagree	Unsure/neutral	Strongly agree	Unsure/neutral	Strongly agree	Unsure/neutral	Disagree	Unsure/neutral	Unsure/neutral	Disagree	Disagree	Strongly disagree	Disagree	Disagree	Strongly agree	Agree	Disagree	Strongly agree	Agree	Disagree	Strongly agree	Disagree	Agree	Strongly agree	Strongly agree	Strongly agree	Strongly agree	Unsure/neutral	Strongly agree	Strongly agree	Unsure/neutral	Strongly agree	Strongly agree	Strongly disagree	Strongly agree
Waikato Region	Strongly disagree	Disagree	Strongly disagree	Strongly disagree	Strongly disagree	Strongly agree	Strongly agree	Strongly disagree	Agree	Strongly disagree	Strongly agree	Agree	Agree	Strongly disagree	Strongly agree	Agree	Disagree	Disagree	Agree	Strongly agree	Agree	Agree	Agree	Agree	Agree	Agree	Agree	Agree	Unsure/neutral	Agree	Agree	Agree	Agree	Agree	Agree	Agree	Agree	Agree	Agree	Agree	Agree	Disagree	Agree	Agree	Disagree	Strongly agree	Strongly agree	Strongly disagree	Strongly agree
Southland Region	Disagree	Disagree	Strongly disagree	Unsure/neutral	Disagree	Disagree	Agree	Disagree	Agree	Disagree	Unsure/neutral	Unsure/neutral	Agree	Disagree	Agree	Agree	Unsure/neutral	Unsure/neutral	Agree	Agree	Agree	Agree	Agree	Agree	Agree	Agree	Unsure/neutral	Unsure/neutral	Unsure/neutral	Unsure/neutral	Agree	Agree	Unsure/neutral	Agree	Agree	Agree	Agree	Agree	Agree	Unsure/neutral	Agree	Disagree	Unsure/neutral	Agree	Disagree	Agree	Agree	Disagree	Agree
Waikato Region	Strongly disagree	Disagree	Strongly disagree	Strongly disagree	Strongly disagree	Strongly disagree	Agree	Strongly disagree	Strongly disagree	Strongly disagree	Agree	Agree	Agree	Strongly disagree	Strongly agree	Agree	Strongly disagree	Strongly disagree	Strongly disagree	Strongly agree	Strongly agree	Strongly agree	Strongly agree	Strongly agree	Strongly agree	Agree	Strongly agree	Strongly agree	Unsure/neutral	Agree	Strongly agree	Disagree	Agree	Strongly agree	Disagree	Strongly agree	Agree	Strongly agree	Agree	Agree	Strongly agree	Strongly disagree	Agree	Strongly agree	Strongly disagree	Strongly agree	Strongly agree	Strongly disagree	Strongly agree
Taranaki Region	Strongly disagree	Unsure/neutral	Strongly disagree	Agree	Disagree	Strongly disagree	Strongly agree	Strongly disagree	Strongly agree	Disagree	Strongly agree	Agree	Strongly agree	Disagree	Agree	Agree	Disagree	Agree	Agree	Agree	Agree	Agree	Agree	Agree	Agree	Disagree	Unsure/neutral	Unsure/neutral	Agree	Agree	Agree	Agree	Agree	Agree	Strongly agree	Unsure/neutral	Unsure/neutral	Disagree	Unsure/neutral	Unsure/neutral	Agree	Agree	Agree	Agree	Agree	Agree	Agree	Disagree	Agree
Auckland Region	Disagree	Agree	Disagree	Agree	Disagree	Agree	Strongly agree	Disagree	Agree	Agree	Unsure/neutral	Agree	Strongly agree	Unsure/neutral	Agree	Agree	Agree	Agree	Strongly agree	Agree	Unsure/neutral	Agree	Agree	Agree	Agree	Disagree	Unsure/neutral	Unsure/neutral	Strongly agree	Agree	Unsure/neutral	Agree	Unsure/neutral	Unsure/neutral	Agree	Agree	Disagree	Agree	Unsure/neutral	Agree	Agree	Unsure/neutral	Strongly agree	Agree	Unsure/neutral	Agree	Agree	Strongly disagree	Strongly agree
Canterbury Region	Strongly disagree	Strongly disagree	Strongly disagree	Strongly disagree	Strongly disagree	Strongly disagree	Strongly agree	Strongly disagree	Disagree	Strongly disagree	Agree	Disagree	Agree	Strongly disagree	Strongly agree	Disagree	Disagree	Strongly disagree	Disagree	Agree	Strongly agree	Strongly agree	Strongly agree	Strongly agree	Strongly agree	Unsure/neutral	Agree	Agree	Agree	Unsure/neutral	Agree	Unsure/neutral	Agree	Agree	Agree	Agree	Agree	Unsure/neutral	Strongly agree	Agree	Agree	Agree	Agree	Agree	Agree	Agree	Agree	Unsure/neutral	Strongly agree
Auckland Region	Strongly disagree	Strongly disagree	Strongly disagree	Strongly disagree	Strongly disagree	Strongly disagree	Unsure/neutral	Strongly disagree	Strongly agree	Strongly agree	Strongly agree	Strongly agree	Agree	Strongly disagree	Strongly agree	Strongly agree	Strongly disagree	Disagree	Agree	Strongly agree	Strongly agree	Strongly agree	Agree	Strongly agree	Agree	Strongly agree	Strongly agree	Strongly agree	Agree	Strongly agree	Strongly agree	Disagree	Strongly agree	Strongly agree	Agree	Strongly agree	Strongly agree	Strongly agree	Strongly agree	Strongly agree	Strongly agree	Strongly disagree	Strongly agree	Strongly agree	Strongly disagree	Strongly agree	Strongly agree	Strongly disagree	Strongly agree
Waikato Region	Disagree	Disagree	Strongly disagree	Disagree	Disagree	Disagree	Agree	Disagree	Agree	Disagree	Agree	Agree	Agree	Disagree	Agree	Agree	Disagree	Disagree	Agree	Strongly agree	Agree	Agree	Unsure/neutral	Disagree	Unsure/neutral	Disagree	Unsure/neutral	Disagree	Agree	Strongly agree	Agree	Unsure/neutral	Agree	Agree	Unsure/neutral	Agree	Unsure/neutral	Unsure/neutral	Unsure/neutral	Agree	Agree	Agree	Agree	Agree	Unsure/neutral	Agree	Agree	Agree	Agree
Auckland Region	Strongly disagree	Disagree	Strongly disagree	Unsure/neutral	Unsure/neutral	Agree	Strongly agree	Strongly disagree	Unsure/neutral	Strongly disagree	Agree	Agree	Agree	Strongly disagree	Agree	Agree	Unsure/neutral	Disagree	Strongly agree	Agree	Agree	Agree	Agree	Strongly agree	Agree	Agree	Agree	Agree	Agree	Unsure/neutral	Agree	Agree	Unsure/neutral	Agree	Agree	Strongly agree	Agree	Agree	Agree	Unsure/neutral	Agree	Disagree	Unsure/neutral	Agree	Disagree	Strongly agree	Strongly agree	Strongly disagree	Strongly agree
Auckland Region	Strongly disagree	Strongly disagree	Strongly disagree	Strongly disagree	Strongly disagree	Strongly disagree	Strongly agree	Unsure/neutral	Strongly agree	Strongly disagree	Strongly agree	Agree	Agree	Strongly disagree	Agree	Unsure/neutral	Agree	Disagree	Agree	Agree	Strongly agree	Strongly agree	Strongly agree	Strongly agree	Strongly agree	Strongly disagree	Agree	Agree	Agree	Unsure/neutral	Agree	Agree	Unsure/neutral	Agree	Agree	Agree	Strongly agree	Agree	Strongly agree	Unsure/neutral	Strongly agree	Strongly disagree	Agree	Strongly agree	Strongly disagree	Strongly agree	Strongly agree	Strongly disagree	Strongly agree
Canterbury Region	Disagree	Unsure/neutral	Strongly disagree	Disagree	Strongly disagree	Strongly disagree	Agree	Strongly disagree	Strongly agree	Disagree	Strongly agree	Unsure/neutral	Agree	Strongly disagree	Agree	Agree	Disagree	Strongly disagree	Agree	Strongly agree	Strongly agree	Strongly agree	Strongly agree	Strongly agree	Strongly agree	Agree	Strongly agree	Strongly agree	Disagree	Strongly agree	Strongly agree	Disagree	Agree	Strongly agree	Agree	Agree	Strongly agree	Agree	Agree	Agree	Strongly agree	Strongly disagree	Agree	Strongly agree	Strongly disagree	Strongly agree	Strongly agree	Strongly disagree	Strongly agree
Gisborne Region	Strongly disagree	Disagree	Strongly disagree	Unsure/neutral	Strongly disagree	Strongly disagree	Disagree	Strongly disagree	Unsure/neutral	Disagree	Unsure/neutral	Agree	Agree	Strongly disagree	Unsure/neutral	Unsure/neutral	Unsure/neutral	Unsure/neutral	Agree	Agree	Agree	Unsure/neutral	Agree	Agree	Agree	Disagree	Unsure/neutral	Disagree	Unsure/neutral	Disagree	Unsure/neutral	Agree	Disagree	Disagree	Agree	Unsure/neutral	Unsure/neutral	Unsure/neutral	Disagree	Unsure/neutral	Agree	Strongly disagree	Unsure/neutral	Unsure/neutral	Disagree	Agree	Agree	Disagree	Agree
Wellington Region	Strongly disagree	Unsure/neutral	Disagree	Agree	Strongly disagree	Disagree	Strongly agree	Disagree	Unsure/neutral	Unsure/neutral	Agree	Agree	Strongly agree	Strongly disagree	Agree	Agree	Agree	Agree	Strongly agree	Agree	Unsure/neutral	Agree	Disagree	Agree	Disagree	Disagree	Unsure/neutral	Strongly disagree	Agree	Unsure/neutral	Disagree	Unsure/neutral	Unsure/neutral	Unsure/neutral	Unsure/neutral	Disagree	Disagree	Disagree	Disagree	Unsure/neutral	Agree	Disagree	Unsure/neutral	Disagree	Disagree	Disagree	Unsure/neutral	Disagree	Disagree
Auckland Region	Strongly disagree	Disagree	Strongly disagree	Strongly disagree	Strongly disagree	Disagree	Agree	Strongly disagree	Agree	Disagree	Agree	Agree	Strongly agree	Strongly disagree	Strongly agree	Strongly agree	Unsure/neutral	Unsure/neutral	Agree	Strongly agree	Strongly agree	Strongly agree	Agree	Agree	Agree	Unsure/neutral	Agree	Agree	Agree	Agree	Agree	Unsure/neutral	Agree	Unsure/neutral	Disagree	Unsure/neutral	Agree	Agree	Agree	Agree	Agree	Agree	Agree	Agree	Agree	Strongly agree	Strongly agree	Strongly disagree	Agree
Auckland Region	Strongly agree	Agree	Agree	Strongly agree	Agree	Agree	Agree	Agree	Agree	Agree	Agree	Agree	Strongly agree	Strongly agree	Strongly agree	Strongly agree	Strongly agree	Strongly agree	Strongly agree	Strongly agree	Agree	Agree	Agree	Agree	Agree	Strongly agree	Strongly agree	Strongly agree	Strongly agree	Strongly agree	Agree	Strongly agree	Strongly agree	Strongly agree	Agree	Agree	Agree	Agree	Agree	Agree	Agree	Agree	Agree	Agree	Agree	Strongly agree	Strongly agree	Strongly agree	Strongly agree
Auckland Region	Strongly disagree	Disagree	Disagree	Disagree	Strongly disagree	Disagree	Agree	Strongly disagree	Unsure/neutral	Unsure/neutral	Unsure/neutral	Agree	Agree	Disagree	Unsure/neutral	Unsure/neutral	Agree	Unsure/neutral	Agree	Agree	Unsure/neutral	Unsure/neutral	Unsure/neutral	Unsure/neutral	Unsure/neutral	Unsure/neutral	Strongly disagree	Strongly disagree	Unsure/neutral	Strongly disagree	Unsure/neutral	Unsure/neutral	Disagree	Unsure/neutral	Unsure/neutral	Strongly agree	Unsure/neutral	Unsure/neutral	Unsure/neutral	Unsure/neutral	Agree	Strongly disagree	Strongly disagree	Agree	Unsure/neutral	Agree	Agree	Strongly disagree	Agree
Northland Region	Strongly disagree	Disagree	Strongly disagree	Unsure/neutral	Unsure/neutral	Strongly disagree	Agree	Strongly disagree	Unsure/neutral	Disagree	Agree	Unsure/neutral	Unsure/neutral	Strongly disagree	Agree	Unsure/neutral	Unsure/neutral	Disagree	Agree	Agree	Agree	Agree	Agree	Agree	Agree	Agree	Agree	Agree	Disagree	Agree	Agree	Unsure/neutral	Agree	Agree	Agree	Agree	Disagree	Agree	Unsure/neutral	Agree	Agree	Disagree	Unsure/neutral	Agree	Disagree	Agree	Agree	Disagree	Agree
Bay of Plenty Region	Strongly disagree	Strongly disagree	Strongly disagree	Agree	Disagree	Disagree	Agree	Strongly disagree	Agree	Disagree	Agree	Unsure/neutral	Agree	Strongly disagree	Agree	Agree	Disagree	Disagree	Agree	Agree	Agree	Agree	Agree	Agree	Agree	Agree	Agree	Unsure/neutral	Agree	Agree	Agree	Disagree	Agree	Agree	Agree	Unsure/neutral	Agree	Unsure/neutral	Unsure/neutral	Agree	Agree	Unsure/neutral	Agree	Agree	Agree	Agree	Agree	Disagree	Agree
Auckland Region	Strongly disagree	Strongly disagree	Strongly disagree	Strongly disagree	Strongly disagree	Strongly disagree	Strongly agree	Strongly disagree	Agree	Strongly disagree	Strongly agree	Agree	Agree	Strongly disagree	Strongly agree	Agree	Strongly disagree	Disagree	Agree	Strongly agree	Strongly agree	Agree	Strongly agree	Strongly agree	Strongly agree	Strongly agree	Strongly agree	Strongly agree	Agree	Agree	Strongly agree	Strongly agree	Agree	Strongly agree	Strongly agree	Unsure/neutral	Agree	Agree	Agree	Agree	Strongly agree	Strongly disagree	Agree	Strongly agree	Strongly disagree	Strongly agree	Strongly agree	Strongly disagree	Strongly agree
Otago Region	Strongly disagree	Disagree	Strongly disagree	Strongly disagree	Disagree	Strongly disagree	Strongly agree	Disagree	Unsure/neutral	Strongly disagree	Strongly agree	Unsure/neutral	Unsure/neutral	Strongly disagree	Strongly agree	Unsure/neutral	Disagree	Disagree	Disagree	Agree	Strongly agree	Strongly agree	Strongly agree	Strongly agree	Strongly agree	Agree	Strongly agree	Strongly agree	Unsure/neutral	Strongly agree	Strongly agree	Unsure/neutral	Strongly agree	Strongly agree	Unsure/neutral	Strongly agree	Strongly agree	Strongly agree	Agree	Strongly agree	Strongly agree	Strongly disagree	Strongly agree	Strongly agree	Strongly disagree	Strongly agree	Strongly agree	Strongly disagree	Strongly agree
Auckland Region	Strongly disagree	Disagree	Strongly disagree	Strongly disagree	Disagree	Disagree	Strongly agree	Strongly disagree	Agree	Strongly disagree	Agree	Unsure/neutral	Strongly agree	Agree	Strongly agree	Unsure/neutral	Unsure/neutral	Unsure/neutral	Unsure/neutral	Strongly agree	Strongly agree	Unsure/neutral	Agree	Unsure/neutral	Unsure/neutral	Unsure/neutral	Strongly agree	Unsure/neutral	Unsure/neutral	Agree	Unsure/neutral	Unsure/neutral	Unsure/neutral	Agree	Disagree	Unsure/neutral	Agree	Strongly agree	Unsure/neutral	Agree	Unsure/neutral	Unsure/neutral	Agree	Strongly agree	Strongly disagree	Strongly agree	Strongly agree	Strongly disagree	Strongly agree
Manawatu-Whanganui Region	Strongly disagree	Strongly disagree	Strongly disagree	Disagree	Disagree	Strongly disagree	Strongly agree	Strongly disagree	Agree	Disagree	Unsure/neutral	Strongly agree	Agree	Strongly disagree	Strongly agree	Strongly agree	Agree	Unsure/neutral	Agree	Strongly agree	Strongly agree	Strongly agree	Strongly agree	Strongly agree	Strongly agree	Agree	Strongly agree	Agree	Strongly agree	Strongly agree	Agree	Strongly agree	Agree	Agree	Unsure/neutral	Agree	Agree	Agree	Disagree	Agree	Agree	Disagree	Agree	Agree	Disagree	Strongly agree	Strongly agree	Strongly disagree	Strongly agree
Wellington Region	Disagree	Disagree	Strongly disagree	Disagree	Disagree	Strongly disagree	Agree	Disagree	Agree	Disagree	Agree	Unsure/neutral	Agree	Disagree	Strongly agree	Agree	Disagree	Strongly disagree	Agree	Agree	Agree	Agree	Agree	Agree	Agree	Agree	Agree	Agree	Strongly agree	Agree	Agree	Disagree	Agree	Agree	Disagree	Strongly agree	Agree	Agree	Agree	Agree	Agree	Disagree	Agree	Agree	Disagree	Strongly agree	Strongly agree	Strongly disagree	Strongly agree
Auckland Region	Strongly disagree	Strongly disagree	Unsure/neutral	Unsure/neutral	Strongly disagree	Disagree	Strongly agree	Disagree	Strongly agree	Disagree	Unsure/neutral	Unsure/neutral	Unsure/neutral	Disagree	Agree	Agree	Disagree	Disagree	Agree	Agree	Agree	Agree	Agree	Agree	Agree	Agree	Unsure/neutral	Agree	Unsure/neutral	Agree	Agree	Agree	Agree	Agree	Unsure/neutral	Agree	Unsure/neutral	Agree	Unsure/neutral	Agree	Agree	Disagree	Agree	Agree	Disagree	Strongly agree	Strongly agree	Strongly disagree	Strongly agree
Canterbury Region	Strongly disagree	Strongly disagree	Strongly disagree	Strongly disagree	Strongly disagree	Disagree	Strongly agree	Strongly disagree	Agree	Strongly disagree	Strongly agree	Strongly agree	Agree	Strongly disagree	Strongly agree	Strongly agree	Strongly disagree	Strongly disagree	Agree	Strongly agree	Strongly agree	Agree	Strongly agree	Strongly agree	Strongly agree	Strongly agree	Strongly agree	Strongly agree	Strongly agree	Strongly agree	Strongly agree	Agree	Agree	Strongly agree	Agree	Strongly agree	Agree	Strongly agree	Agree	Strongly agree	Strongly agree	Disagree	Strongly agree	Strongly agree	Disagree	Strongly agree	Strongly agree	Strongly disagree	Strongly agree
Wellington Region	Strongly disagree	Disagree	Strongly disagree	Strongly agree	Strongly disagree	Strongly disagree	Strongly agree	Strongly disagree	Agree	Strongly disagree	Strongly agree	Agree	Agree	Disagree	Strongly agree	Strongly agree	Disagree	Disagree	Disagree	Strongly agree	Strongly agree	Strongly agree	Strongly agree	Strongly agree	Strongly agree	Agree	Strongly agree	Agree	Agree	Agree	Strongly agree	Disagree	Agree	Agree	Unsure/neutral	Agree	Agree	Agree	Agree	Agree	Strongly agree	Disagree	Agree	Agree	Strongly disagree	Strongly agree	Strongly agree	Strongly disagree	Strongly agree
Waikato Region	Strongly disagree	Disagree	Strongly disagree	Strongly agree	Strongly disagree	Disagree	Agree	Strongly disagree	Agree	Disagree	Disagree	Strongly disagree	Disagree	Disagree	Agree	Unsure/neutral	Unsure/neutral	Disagree	Disagree	Unsure/neutral	Strongly agree	Strongly agree	Strongly agree	Strongly agree	Strongly agree	Agree	Unsure/neutral	Agree	Unsure/neutral	Unsure/neutral	Agree	Disagree	Agree	Strongly agree	Disagree	Unsure/neutral	Unsure/neutral	Unsure/neutral	Unsure/neutral	Unsure/neutral	Agree	Disagree	Agree	Agree	Disagree	Agree	Agree	Disagree	Agree
Hawke's Bay Region	Strongly disagree	Strongly disagree	Strongly disagree	Strongly disagree	Strongly disagree	Strongly disagree	Strongly agree	Agree	Unsure/neutral	Strongly disagree	Agree	Strongly agree	Strongly agree	Disagree	Strongly agree	Strongly agree	Strongly disagree	Disagree	Disagree	Agree	Strongly agree	Strongly agree	Strongly agree	Strongly agree	Strongly agree	Strongly agree	Strongly agree	Strongly agree	Strongly agree	Agree	Strongly agree	Agree	Agree	Strongly agree	Strongly agree	Strongly agree	Strongly agree	Strongly agree	Agree	Agree	Strongly agree	Disagree	Agree	Strongly agree	Disagree	Strongly agree	Strongly agree	Strongly disagree	Strongly agree
Taranaki Region	Strongly disagree	Strongly disagree	Strongly disagree	Strongly disagree	Strongly disagree	Strongly disagree	Strongly agree	Strongly disagree	Disagree	Strongly disagree	Agree	Agree	Agree	Strongly disagree	Agree	Strongly agree	Disagree	Disagree	Agree	Strongly agree	Strongly agree	Agree	Agree	Agree	Agree	Agree	Agree	Agree	Agree	Agree	Agree	Disagree	Strongly agree	Agree	Strongly agree	Strongly disagree	Strongly disagree	Strongly disagree	Strongly disagree	Disagree	Strongly disagree	Agree	Disagree	Disagree	Strongly disagree	Strongly disagree	Strongly disagree	Strongly agree	Strongly disagree
Bay of Plenty Region	Strongly disagree	Strongly disagree	Strongly disagree	Strongly disagree	Strongly disagree	Strongly disagree	Agree	Strongly disagree	Agree	Strongly disagree	Agree	Agree	Agree	Strongly disagree	Strongly agree	Strongly agree	Strongly agree	Strongly agree	Strongly agree	Strongly agree	Agree	Agree	Agree	Agree	Agree	Agree	Strongly agree	Agree	Unsure/neutral	Agree	Agree	Unsure/neutral	Agree	Agree	Unsure/neutral	Agree	Unsure/neutral	Agree	Unsure/neutral	Agree	Agree	Unsure/neutral	Agree	Agree	Agree	Agree	Agree	Disagree	Agree
Otago Region	Strongly disagree	Unsure/neutral	Strongly disagree	Disagree	Disagree	Disagree	Disagree	Strongly disagree	Unsure/neutral	Disagree	Agree	Agree	Unsure/neutral	Disagree	Agree	Agree	Disagree	Disagree	Unsure/neutral	Agree	Agree	Agree	Agree	Agree	Agree	Agree	Agree	Agree	Agree	Agree	Agree	Strongly agree	Agree	Agree	Strongly agree	Agree	Unsure/neutral	Unsure/neutral	Agree	Agree	Agree	Agree	Agree	Agree	Agree	Unsure/neutral	Agree	Disagree	Agree
Auckland Region	Strongly disagree	Unsure/neutral	Strongly disagree	Disagree	Strongly disagree	Disagree	Agree	Strongly disagree	Agree	Disagree	Agree	Unsure/neutral	Agree	Disagree	Strongly agree	Strongly agree	Disagree	Strongly disagree	Disagree	Strongly agree	Strongly agree	Strongly agree	Strongly agree	Strongly agree	Agree	Agree	Strongly agree	Agree	Agree	Agree	Agree	Agree	Agree	Agree	Agree	Agree	Agree	Agree	Agree	Agree	Agree	Agree	Agree	Strongly agree	Agree	Agree	Agree	Strongly disagree	Agree
Northland Region	Strongly disagree	Disagree	Strongly disagree	Strongly disagree	Disagree	Strongly disagree	Strongly agree	Strongly disagree	Unsure/neutral	Strongly disagree	Strongly agree	Agree	Strongly agree	Disagree	Strongly agree	Strongly agree	Unsure/neutral	Unsure/neutral	Agree	Strongly agree	Strongly agree	Agree	Agree	Strongly agree	Agree	Agree	Strongly agree	Strongly agree	Disagree	Agree	Agree	Strongly agree	Agree	Strongly agree	Strongly agree	Agree	Agree	Agree	Unsure/neutral	Strongly agree	Strongly agree	Agree	Strongly agree	Agree	Strongly agree	Agree	Agree	Strongly disagree	Agree
Southland Region	Disagree	Disagree	Strongly disagree	Disagree	Disagree	Disagree	Agree	Disagree	Agree	Disagree	Strongly agree	Agree	Agree	Disagree	Agree	Agree	Disagree	Disagree	Agree	Strongly agree	Strongly agree	Strongly agree	Strongly agree	Strongly agree	Strongly agree	Agree	Agree	Agree	Agree	Unsure/neutral	Agree	Agree	Unsure/neutral	Agree	Agree	Agree	Agree	Agree	Agree	Agree	Agree	Disagree	Agree	Agree	Disagree	Strongly agree	Strongly agree	Strongly disagree	Strongly agree
Otago Region	Strongly disagree	Strongly disagree	Strongly disagree	Disagree	Disagree	Strongly disagree	Agree	Disagree	Agree	Disagree	Agree	Agree	Unsure/neutral	Strongly disagree	Agree	Agree	Disagree	Unsure/neutral	Unsure/neutral	Agree	Agree	Agree	Agree	Agree	Agree	Agree	Agree	Agree	Agree	Agree	Agree	Unsure/neutral	Agree	Agree	Agree	Agree	Agree	Agree	Agree	Agree	Agree	Unsure/neutral	Agree	Agree	Unsure/neutral	Agree	Agree	Disagree	Agree
West Coast Region	Disagree	Disagree	Strongly disagree	Strongly disagree	Disagree	Disagree	Strongly disagree	Disagree	Agree	Disagree	Unsure/neutral	Agree	Agree	Disagree	Agree	Agree	Disagree	Disagree	Agree	Agree	Agree	Agree	Agree	Agree	Agree	Agree	Strongly agree	Agree	Unsure/neutral	Agree	Agree	Strongly agree	Agree	Agree	Strongly agree	Agree	Agree	Agree	Agree	Agree	Agree	Agree	Agree	Strongly agree	Disagree	Strongly agree	Strongly agree	Strongly disagree	Strongly agree
Manawatu-Whanganui Region	Disagree	Disagree	Strongly disagree	Disagree	Disagree	Disagree	Agree	Disagree	Agree	Disagree	Agree	Unsure/neutral	Agree	Disagree	Agree	Agree	Disagree	Disagree	Agree	Agree	Agree	Agree	Agree	Agree	Agree	Agree	Agree	Agree	Agree	Agree	Agree	Unsure/neutral	Unsure/neutral	Agree	Agree	Agree	Agree	Agree	Unsure/neutral	Unsure/neutral	Agree	Disagree	Unsure/neutral	Agree	Disagree	Agree	Agree	Disagree	Agree
Auckland Region	Strongly disagree	Strongly disagree	Strongly disagree	Strongly disagree	Strongly agree	Strongly disagree	Strongly agree	Strongly disagree	Strongly agree	Strongly disagree	Strongly disagree	Unsure/neutral	Strongly agree	Strongly disagree	Strongly agree	Strongly agree	Disagree	Strongly disagree	Strongly agree	Strongly agree	Strongly agree	Strongly agree	Strongly agree	Strongly agree	Strongly agree	Strongly agree	Strongly agree	Strongly agree	Strongly disagree	Strongly agree	Strongly agree	Strongly disagree	Agree	Strongly agree	Strongly disagree	Strongly agree	Agree	Strongly agree	Agree	Strongly agree	Strongly agree	Strongly disagree	Strongly agree	Strongly agree	Strongly disagree	Strongly agree	Strongly agree	Strongly agree	Strongly agree
Auckland Region	Strongly disagree	Disagree	Strongly disagree	Disagree	Agree	Strongly disagree	Agree	Strongly disagree	Unsure/neutral	Strongly disagree	Agree	Agree	Agree	Disagree	Agree	Agree	Disagree	Agree	Unsure/neutral	Agree	Agree	Agree	Agree	Agree	Agree	Agree	Strongly agree	Agree	Disagree	Unsure/neutral	Agree	Agree	Agree	Agree	Agree	Agree	Agree	Agree	Agree	Agree	Agree	Disagree	Agree	Agree	Disagree	Agree	Agree	Disagree	Agree
Canterbury Region	Disagree	Unsure/neutral	Strongly disagree	Disagree	Strongly disagree	Disagree	Agree	Disagree	Strongly agree	Unsure/neutral	Agree	Strongly agree	Agree	Disagree	Agree	Agree	Unsure/neutral	Unsure/neutral	Agree	Strongly agree	Agree	Agree	Agree	Agree	Agree	Agree	Agree	Unsure/neutral	Agree	Agree	Agree	Agree	Agree	Agree	Disagree	Unsure/neutral	Unsure/neutral	Unsure/neutral	Strongly disagree	Agree	Agree	Strongly disagree	Strongly agree	Unsure/neutral	Disagree	Agree	Agree	Strongly disagree	Agree
Hawke's Bay Region	Disagree	Unsure/neutral	Strongly disagree	Agree	Disagree	Disagree	Strongly agree	Disagree	Unsure/neutral	Disagree	Unsure/neutral	Agree	Agree	Disagree	Unsure/neutral	Agree	Unsure/neutral	Unsure/neutral	Agree	Agree	Unsure/neutral	Unsure/neutral	Unsure/neutral	Agree	Unsure/neutral	Disagree	Disagree	Disagree	Unsure/neutral	Unsure/neutral	Disagree	Unsure/neutral	Disagree	Unsure/neutral	Unsure/neutral	Disagree	Unsure/neutral	Disagree	Unsure/neutral	Unsure/neutral	Unsure/neutral	Disagree	Disagree	Unsure/neutral	Disagree	Unsure/neutral	Unsure/neutral	Unsure/neutral	Unsure/neutral
Bay of Plenty Region	Strongly disagree	Disagree	Strongly disagree	Strongly disagree	Strongly disagree	Strongly disagree	Strongly agree	Strongly disagree	Strongly agree	Disagree	Strongly agree	Strongly agree	Strongly agree	Disagree	Strongly agree	Strongly agree	Strongly disagree	Strongly disagree	Agree	Strongly agree	Strongly agree	Strongly agree	Strongly agree	Strongly agree	Strongly agree	Strongly agree	Strongly agree	Strongly agree	Strongly agree	Strongly agree	Strongly agree	Unsure/neutral	Strongly agree	Strongly agree	Unsure/neutral	Strongly agree	Strongly agree	Strongly agree	Strongly agree	Strongly agree	Strongly agree	Strongly disagree	Strongly agree	Strongly agree	Strongly disagree	Strongly agree	Strongly agree	Strongly disagree	Strongly agree
Manawatu-Whanganui Region	Disagree	Disagree	Unsure/neutral	Agree	Disagree	Disagree	Agree	Disagree	Unsure/neutral	Agree	Agree	Unsure/neutral	Agree	Disagree	Unsure/neutral	Agree	Unsure/neutral	Agree	Agree	Disagree	Unsure/neutral	Unsure/neutral	Agree	Agree	Agree	Disagree	Disagree	Disagree	Disagree	Unsure/neutral	Unsure/neutral	Agree	Disagree	Unsure/neutral	Agree	Disagree	Disagree	Disagree	Disagree	Unsure/neutral	Unsure/neutral	Agree	Unsure/neutral	Disagree	Disagree	Disagree	Disagree	Unsure/neutral	Unsure/neutral
Auckland Region	Strongly disagree	Strongly disagree	Strongly disagree	Strongly disagree	Strongly disagree	Strongly disagree	Strongly disagree	Agree	Agree	Strongly disagree	Agree	Strongly disagree	Agree	Strongly disagree	Strongly agree	Strongly disagree	Strongly disagree	Strongly disagree	Strongly agree	Strongly agree	Unsure/neutral	Strongly disagree	Strongly agree	Agree	Strongly agree	Disagree	Strongly agree	Agree	Strongly agree	Agree	Agree	Disagree	Agree	Disagree	Unsure/neutral	Agree	Strongly agree	Agree	Strongly agree	Agree	Agree	Unsure/neutral	Strongly agree	Agree	Agree	Strongly agree	Unsure/neutral	Agree	Agree
Auckland Region	Strongly disagree	Strongly disagree	Strongly disagree	Unsure/neutral	Strongly disagree	Strongly disagree	Strongly agree	Strongly disagree	Strongly agree	Strongly disagree	Strongly agree	Unsure/neutral	Agree	Strongly disagree	Unsure/neutral	Agree	Disagree	Unsure/neutral	Unsure/neutral	Agree	Unsure/neutral	Agree	Agree	Agree	Unsure/neutral	Unsure/neutral	Unsure/neutral	Disagree	Strongly agree	Unsure/neutral	Agree	Agree	Agree	Unsure/neutral	Agree	Unsure/neutral	Agree	Disagree	Agree	Agree	Strongly agree	Strongly disagree	Agree	Strongly agree	Strongly disagree	Strongly agree	Strongly agree	Strongly disagree	Strongly agree
Auckland Region	Strongly disagree	Disagree	Strongly disagree	Disagree	Strongly disagree	Disagree	Strongly agree	Strongly disagree	Agree	Disagree	Strongly agree	Agree	Agree	Strongly disagree	Strongly agree	Strongly agree	Strongly disagree	Disagree	Agree	Agree	Strongly agree	Strongly agree	Strongly agree	Strongly agree	Strongly agree	Agree	Strongly agree	Strongly agree	Agree	Agree	Strongly agree	Disagree	Strongly agree	Strongly agree	Disagree	Unsure/neutral	Agree	Agree	Agree	Unsure/neutral	Agree	Agree	Disagree	Agree	Agree	Unsure/neutral	Unsure/neutral	Disagree	Unsure/neutral
Taranaki Region	Disagree	Disagree	Strongly disagree	Disagree	Disagree	Disagree	Agree	Disagree	Agree	Disagree	Strongly agree	Unsure/neutral	Agree	Disagree	Agree	Agree	Disagree	Unsure/neutral	Unsure/neutral	Agree	Agree	Agree	Agree	Agree	Agree	Agree	Agree	Agree	Agree	Agree	Agree	Agree	Agree	Agree	Agree	Agree	Agree	Agree	Agree	Agree	Agree	Disagree	Agree	Agree	Disagree	Agree	Agree	Disagree	Agree
Hawke's Bay Region	Strongly disagree	Strongly disagree	Strongly disagree	Agree	Strongly disagree	Disagree	Agree	Strongly disagree	Unsure/neutral	Unsure/neutral	Agree	Agree	Agree	Strongly disagree	Agree	Strongly agree	Unsure/neutral	Disagree	Unsure/neutral	Strongly agree	Agree	Agree	Strongly agree	Strongly agree	Agree	Unsure/neutral	Agree	Unsure/neutral	Agree	Unsure/neutral	Agree	Agree	Unsure/neutral	Unsure/neutral	Agree	Agree	Agree	Unsure/neutral	Agree	Unsure/neutral	Agree	Agree	Agree	Agree	Disagree	Strongly agree	Strongly agree	Strongly disagree	Strongly agree
Otago Region	Strongly disagree	Strongly disagree	Strongly disagree	Strongly agree	Strongly disagree	Strongly disagree	Strongly agree	Strongly disagree	Strongly agree	Strongly disagree	Strongly agree	Strongly agree	Strongly agree	Strongly disagree	Strongly agree	Strongly agree	Strongly disagree	Agree	Agree	Strongly agree	Strongly agree	Strongly agree	Strongly agree	Strongly agree	Strongly agree	Strongly agree	Strongly agree	Strongly agree	Strongly agree	Strongly agree	Strongly agree	Strongly disagree	Strongly agree	Strongly agree	Strongly disagree	Strongly disagree	Disagree	Strongly agree	Disagree	Strongly agree	Strongly agree	Strongly agree	Strongly agree	Strongly agree	Strongly disagree	Strongly agree	Strongly agree	Strongly disagree	Strongly agree
Canterbury Region	Strongly disagree	Strongly disagree	Strongly disagree	Strongly disagree	Strongly disagree	Strongly disagree	Strongly agree	Strongly disagree	Strongly agree	Strongly disagree	Strongly agree	Strongly agree	Strongly agree	Strongly disagree	Strongly agree	Strongly agree	Strongly disagree	Strongly disagree	Strongly disagree	Strongly agree	Strongly agree	Strongly agree	Strongly agree	Strongly agree	Strongly agree	Strongly agree	Strongly agree	Strongly agree	Strongly agree	Strongly agree	Strongly agree	Agree	Strongly agree	Strongly agree	Strongly agree	Agree	Agree	Agree	Strongly agree	Strongly agree	Strongly agree	Agree	Strongly agree	Agree	Disagree	Strongly agree	Strongly agree	Strongly disagree	Strongly agree
Auckland Region	Strongly disagree	Disagree	Strongly disagree	Disagree	Disagree	Strongly disagree	Agree	Strongly disagree	Agree	Disagree	Strongly agree	Strongly agree	Agree	Strongly disagree	Strongly agree	Strongly agree	Disagree	Disagree	Agree	Strongly agree	Strongly agree	Strongly agree	Strongly agree	Strongly agree	Strongly agree	Agree	Strongly agree	Agree	Strongly agree	Unsure/neutral	Agree	Disagree	Unsure/neutral	Agree	Disagree	Disagree	Unsure/neutral	Agree	Unsure/neutral	Agree	Agree	Disagree	Agree	Agree	Disagree	Agree	Agree	Strongly disagree	Agree
Auckland Region	Disagree	Disagree	Strongly disagree	Unsure/neutral	Disagree	Disagree	Disagree	Disagree	Agree	Disagree	Agree	Agree	Agree	Disagree	Unsure/neutral	Agree	Unsure/neutral	Unsure/neutral	Agree	Agree	Agree	Agree	Agree	Agree	Agree	Unsure/neutral	Agree	Unsure/neutral	Unsure/neutral	Agree	Agree	Agree	Agree	Agree	Agree	Agree	Agree	Unsure/neutral	Agree	Agree	Strongly agree	Disagree	Agree	Agree	Disagree	Agree	Agree	Disagree	Agree
Canterbury Region	Strongly disagree	Disagree	Strongly disagree	Disagree	Disagree	Unsure/neutral	Strongly agree	Disagree	Agree	Disagree	Unsure/neutral	Agree	Agree	Strongly disagree	Unsure/neutral	Agree	Unsure/neutral	Agree	Agree	Agree	Agree	Agree	Agree	Agree	Agree	Unsure/neutral	Agree	Unsure/neutral	Unsure/neutral	Agree	Agree	Strongly agree	Agree	Disagree	Disagree	Agree	Agree	Unsure/neutral	Unsure/neutral	Agree	Disagree	Disagree	Agree	Disagree	Disagree	Agree	Agree	Disagree	Agree
Waikato Region	Disagree	Disagree	Strongly disagree	Disagree	Disagree	Disagree	Agree	Disagree	Agree	Disagree	Unsure/neutral	Agree	Agree	Disagree	Agree	Agree	Disagree	Disagree	Agree	Agree	Agree	Agree	Strongly agree	Strongly agree	Agree	Unsure/neutral	Agree	Unsure/neutral	Unsure/neutral	Agree	Agree	Agree	Agree	Agree	Agree	Agree	Agree	Agree	Agree	Agree	Strongly agree	Agree	Agree	Strongly agree	Agree	Strongly agree	Strongly agree	Strongly disagree	Strongly agree
Auckland Region	Agree	Strongly agree	Disagree	Agree	Strongly disagree	Agree	Agree	Agree	Strongly agree	Agree	Agree	Agree	Agree	Agree	Unsure/neutral	Unsure/neutral	Unsure/neutral	Unsure/neutral	Agree	Unsure/neutral	Agree	Agree	Disagree	Strongly agree	Unsure/neutral	Unsure/neutral	Unsure/neutral	Unsure/neutral	Strongly agree	Agree	Disagree	Unsure/neutral	Agree	Agree	Agree	Strongly disagree	Agree	Strongly agree	Strongly disagree	Strongly agree	Agree	Strongly agree	Strongly disagree	Unsure/neutral	Strongly disagree	Strongly agree	Agree	Unsure/neutral	Disagree
Canterbury Region	Strongly disagree	Disagree	Strongly agree	Strongly agree	Strongly disagree	Agree	Strongly agree	Strongly disagree	Unsure/neutral	Strongly agree	Strongly disagree	Strongly disagree	Strongly disagree	Strongly disagree	Strongly disagree	Strongly disagree	Strongly agree	Strongly agree	Strongly agree	Strongly disagree	Strongly disagree	Strongly disagree	Strongly disagree	Strongly disagree	Strongly disagree	Strongly disagree	Strongly disagree	Strongly disagree	Unsure/neutral	Unsure/neutral	Strongly disagree	Strongly disagree	Strongly agree	Strongly disagree	Unsure/neutral	Strongly disagree	Unsure/neutral	Strongly disagree	Strongly agree	Unsure/neutral	Strongly disagree	Strongly disagree	Strongly agree	Strongly disagree	Strongly disagree	Strongly disagree	Strongly disagree	Strongly agree	Strongly disagree
Bay of Plenty Region	Strongly disagree	Disagree	Strongly disagree	Strongly disagree	Strongly disagree	Strongly disagree	Strongly agree	Disagree	Strongly agree	Disagree	Strongly agree	Strongly agree	Strongly agree	Strongly disagree	Strongly agree	Strongly agree	Disagree	Disagree	Strongly agree	Strongly agree	Strongly agree	Strongly agree	Strongly agree	Strongly agree	Strongly agree	Agree	Strongly agree	Agree	Agree	Agree	Agree	Agree	Agree	Agree	Agree	Agree	Unsure/neutral	Agree	Disagree	Agree	Agree	Agree	Strongly agree	Agree	Unsure/neutral	Strongly agree	Strongly agree	Strongly disagree	Strongly agree
Auckland Region	Strongly disagree	Disagree	Strongly disagree	Strongly disagree	Disagree	Strongly disagree	Strongly agree	Disagree	Unsure/neutral	Strongly disagree	Strongly agree	Strongly agree	Agree	Disagree	Strongly agree	Strongly agree	Unsure/neutral	Unsure/neutral	Agree	Strongly agree	Strongly agree	Agree	Strongly agree	Strongly agree	Strongly agree	Strongly agree	Strongly agree	Strongly agree	Strongly agree	Agree	Strongly agree	Agree	Agree	Strongly agree	Agree	Strongly agree	Strongly agree	Strongly agree	Agree	Strongly agree	Strongly agree	Disagree	Strongly agree	Strongly agree	Strongly disagree	Strongly agree	Strongly agree	Strongly disagree	Strongly agree
Canterbury Region	Disagree	Disagree	Unsure/neutral	Agree	Agree	Disagree	Agree	Disagree	Disagree	Agree	Strongly agree	Agree	Agree	Disagree	Agree	Agree	Unsure/neutral	Agree	Agree	Agree	Agree	Agree	Agree	Agree	Agree	Agree	Agree	Unsure/neutral	Unsure/neutral	Agree	Agree	Agree	Unsure/neutral	Agree	Unsure/neutral	Agree	Agree	Agree	Agree	Unsure/neutral	Agree	Disagree	Unsure/neutral	Agree	Unsure/neutral	Agree	Agree	Agree	Agree
Bay of Plenty Region	Strongly disagree	Unsure/neutral	Strongly disagree	Disagree	Agree	Disagree	Unsure/neutral	Disagree	Agree	Disagree	Disagree	Disagree	Unsure/neutral	Strongly disagree	Agree	Strongly agree	Unsure/neutral	Disagree	Agree	Strongly agree	Agree	Strongly agree	Strongly agree	Strongly agree	Strongly agree	Agree	Agree	Agree	Strongly agree	Agree	Strongly agree	Strongly agree	Agree	Strongly agree	Strongly agree	Strongly agree	Unsure/neutral	Agree	Agree	Agree	Strongly agree	Agree	Agree	Strongly agree	Unsure/neutral	Strongly agree	Strongly agree	Strongly disagree	Strongly agree
Auckland Region	Disagree	Disagree	Strongly disagree	Strongly disagree	Disagree	Disagree	Strongly agree	Disagree	Agree	Disagree	Agree	Agree	Strongly agree	Strongly disagree	Agree	Agree	Disagree	Disagree	Agree	Strongly agree	Strongly agree	Strongly agree	Strongly agree	Strongly agree	Strongly agree	Agree	Agree	Agree	Agree	Agree	Agree	Disagree	Agree	Agree	Agree	Agree	Unsure/neutral	Agree	Unsure/neutral	Agree	Agree	Disagree	Agree	Agree	Disagree	Strongly agree	Strongly agree	Strongly disagree	Strongly agree
Hawke's Bay Region	Strongly disagree	Disagree	Strongly disagree	Unsure/neutral	Disagree	Strongly agree	Agree	Disagree	Agree	Unsure/neutral	Agree	Agree	Agree	Disagree	Agree	Agree	Unsure/neutral	Unsure/neutral	Disagree	Disagree	Agree	Agree	Strongly agree	Strongly agree	Agree	Agree	Agree	Strongly agree	Unsure/neutral	Agree	Agree	Disagree	Unsure/neutral	Strongly agree	Agree	Agree	Strongly agree	Agree	Unsure/neutral	Agree	Strongly agree	Unsure/neutral	Agree	Strongly agree	Unsure/neutral	Strongly agree	Strongly agree	Agree	Strongly agree
Waikato Region	Disagree	Agree	Disagree	Unsure/neutral	Agree	Disagree	Agree	Unsure/neutral	Agree	Disagree	Disagree	Agree	Agree	Disagree	Agree	Agree	Disagree	Disagree	Agree	Agree	Agree	Agree	Agree	Agree	Agree	Unsure/neutral	Agree	Agree	Unsure/neutral	Agree	Agree	Unsure/neutral	Unsure/neutral	Agree	Unsure/neutral	Agree	Unsure/neutral	Agree	Unsure/neutral	Agree	Agree	Agree	Agree	Agree	Unsure/neutral	Agree	Agree	Agree	Agree
Canterbury Region	Strongly disagree	Agree	Strongly disagree	Unsure/neutral	Disagree	Strongly disagree	Agree	Disagree	Agree	Disagree	Disagree	Agree	Strongly agree	Disagree	Strongly agree	Agree	Unsure/neutral	Disagree	Agree	Strongly agree	Agree	Unsure/neutral	Agree	Agree	Agree	Agree	Agree	Agree	Unsure/neutral	Agree	Agree	Agree	Agree	Agree	Agree	Agree	Unsure/neutral	Agree	Unsure/neutral	Agree	Agree	Disagree	Agree	Agree	Disagree	Agree	Agree	Disagree	Agree
Marlborough Region	Strongly disagree	Strongly disagree	Strongly disagree	Agree	Strongly agree	Strongly disagree	Strongly agree	Strongly disagree	Strongly agree	Strongly disagree	Strongly agree	Agree	Strongly agree	Strongly disagree	Strongly agree	Strongly agree	Disagree	Strongly disagree	Strongly agree	Strongly agree	Strongly agree	Strongly agree	Strongly agree	Strongly agree	Strongly agree	Strongly agree	Strongly agree	Strongly agree	Strongly agree	Strongly agree	Strongly agree	Strongly agree	Strongly agree	Strongly agree	Strongly agree	Strongly agree	Strongly agree	Strongly agree	Strongly agree	Strongly agree	Strongly agree	Agree	Strongly agree	Strongly agree	Agree	Strongly agree	Strongly agree	Strongly disagree	Strongly agree
Wellington Region	Strongly disagree	Strongly disagree	Strongly disagree	Strongly disagree	Disagree	Strongly disagree	Strongly agree	Disagree	Agree	Disagree	Strongly agree	Unsure/neutral	Strongly agree	Strongly disagree	Strongly agree	Agree	Unsure/neutral	Unsure/neutral	Agree	Strongly agree	Agree	Unsure/neutral	Agree	Agree	Agree	Agree	Unsure/neutral	Unsure/neutral	Unsure/neutral	Agree	Agree	Agree	Agree	Agree	Agree	Agree	Agree	Agree	Unsure/neutral	Unsure/neutral	Agree	Agree	Agree	Strongly agree	Disagree	Agree	Agree	Strongly disagree	Agree
Auckland Region	Strongly disagree	Disagree	Agree	Strongly agree	Unsure/neutral	Strongly agree	Agree	Unsure/neutral	Strongly disagree	Strongly agree	Disagree	Disagree	Disagree	Strongly disagree	Disagree	Unsure/neutral	Strongly agree	Agree	Disagree	Disagree	Unsure/neutral	Disagree	Strongly disagree	Disagree	Strongly disagree	Strongly disagree	Strongly disagree	Strongly disagree	Strongly agree	Strongly disagree	Strongly disagree	Strongly disagree	Strongly disagree	Strongly disagree	Strongly disagree	Strongly disagree	Strongly disagree	Strongly disagree	Strongly disagree	Strongly disagree	Strongly disagree	Strongly disagree	Strongly disagree	Strongly disagree	Strongly disagree	Strongly disagree	Strongly disagree	Strongly agree	Strongly disagree
Wellington Region	Strongly disagree	Strongly disagree	Strongly disagree	Unsure/neutral	Strongly disagree	Strongly disagree	Strongly agree	Strongly disagree	Strongly agree	Strongly disagree	Strongly agree	Strongly agree	Strongly agree	Strongly disagree	Agree	Strongly agree	Strongly agree	Agree	Strongly agree	Strongly agree	Strongly agree	Agree	Agree	Strongly agree	Agree	Agree	Strongly agree	Agree	Disagree	Strongly agree	Strongly agree	Disagree	Agree	Agree	Disagree	Agree	Agree	Strongly agree	Unsure/neutral	Strongly agree	Strongly agree	Strongly agree	Unsure/neutral	Strongly agree	Strongly disagree	Strongly agree	Strongly agree	Disagree	Agree
Manawatu-Whanganui Region	Strongly disagree	Unsure/neutral	Disagree	Disagree	Unsure/neutral	Disagree	Strongly disagree	Disagree	Unsure/neutral	Disagree	Unsure/neutral	Agree	Agree	Strongly disagree	Agree	Agree	Unsure/neutral	Strongly agree	Strongly agree	Strongly agree	Strongly agree	Unsure/neutral	Agree	Strongly agree	Agree	Strongly agree	Strongly agree	Strongly agree	Strongly agree	Agree	Strongly agree	Agree	Strongly agree	Strongly agree	Agree	Strongly agree	Strongly agree	Strongly agree	Unsure/neutral	Strongly agree	Strongly agree	Strongly agree	Strongly agree	Strongly agree	Agree	Strongly agree	Strongly agree	Disagree	Strongly agree
Northland Region	Strongly disagree	Disagree	Strongly disagree	Disagree	Strongly disagree	Agree	Strongly agree	Strongly disagree	Agree	Disagree	Agree	Disagree	Agree	Disagree	Agree	Agree	Strongly agree	Disagree	Agree	Agree	Agree	Agree	Agree	Agree	Agree	Disagree	Agree	Disagree	Disagree	Unsure/neutral	Unsure/neutral	Disagree	Unsure/neutral	Agree	Disagree	Disagree	Agree	Unsure/neutral	Agree	Unsure/neutral	Agree	Disagree	Agree	Agree	Disagree	Agree	Agree	Strongly disagree	Agree
Wellington Region	Strongly disagree	Strongly disagree	Strongly disagree	Strongly disagree	Strongly disagree	Strongly disagree	Strongly agree	Strongly disagree	Strongly agree	Strongly disagree	Strongly agree	Strongly agree	Strongly agree	Strongly disagree	Strongly agree	Strongly agree	Strongly disagree	Strongly disagree	Strongly agree	Strongly agree	Strongly agree	Strongly agree	Strongly agree	Strongly agree	Strongly agree	Strongly agree	Strongly agree	Strongly agree	Strongly disagree	Strongly agree	Strongly agree	Strongly agree	Strongly agree	Strongly agree	Strongly agree	Strongly agree	Strongly agree	Strongly agree	Strongly agree	Strongly agree	Strongly agree	Strongly disagree	Strongly agree	Strongly agree	Strongly disagree	Strongly agree	Strongly agree	Strongly disagree	Strongly agree
Canterbury Region	Strongly disagree	Strongly disagree	Strongly disagree	Disagree	Disagree	Strongly disagree	Strongly agree	Strongly disagree	Disagree	Disagree	Agree	Agree	Unsure/neutral	Disagree	Agree	Agree	Strongly disagree	Unsure/neutral	Unsure/neutral	Strongly agree	Strongly agree	Strongly agree	Strongly agree	Strongly agree	Strongly agree	Agree	Agree	Agree	Unsure/neutral	Agree	Agree	Agree	Agree	Agree	Agree	Disagree	Agree	Unsure/neutral	Unsure/neutral	Agree	Agree	Disagree	Agree	Agree	Disagree	Agree	Agree	Disagree	Agree
Canterbury Region	Strongly disagree	Strongly disagree	Strongly disagree	Strongly disagree	Disagree	Strongly disagree	Agree	Strongly disagree	Agree	Strongly disagree	Agree	Agree	Agree	Disagree	Unsure/neutral	Agree	Unsure/neutral	Disagree	Unsure/neutral	Agree	Agree	Agree	Agree	Agree	Agree	Agree	Disagree	Unsure/neutral	Disagree	Agree	Agree	Agree	Agree	Agree	Unsure/neutral	Unsure/neutral	Unsure/neutral	Unsure/neutral	Disagree	Agree	Agree	Disagree	Agree	Agree	Disagree	Agree	Agree	Disagree	Unsure/neutral
Auckland Region	Strongly disagree	Disagree	Disagree	Strongly agree	Disagree	Agree	Agree	Strongly disagree	Strongly agree	Strongly agree	Disagree	Agree	Strongly agree	Disagree	Strongly disagree	Strongly disagree	Strongly agree	Strongly agree	Strongly agree	Strongly disagree	Disagree	Unsure/neutral	Strongly agree	Disagree	Strongly disagree	Strongly disagree	Strongly disagree	Strongly disagree	Unsure/neutral	Strongly disagree	Strongly disagree	Strongly disagree	Strongly disagree	Strongly disagree	Strongly disagree	Strongly disagree	Disagree	Disagree	Disagree	Disagree	Disagree	Strongly disagree	Disagree	Strongly disagree	Strongly disagree	Strongly disagree	Strongly disagree	Agree	Disagree
Otago Region	Strongly disagree	Strongly disagree	Strongly disagree	Strongly disagree	Strongly disagree	Strongly disagree	Strongly agree	Strongly disagree	Agree	Strongly disagree	Strongly agree	Unsure/neutral	Unsure/neutral	Strongly disagree	Strongly agree	Strongly agree	Strongly disagree	Strongly disagree	Agree	Strongly agree	Strongly agree	Strongly agree	Strongly agree	Strongly agree	Strongly agree	Strongly agree	Strongly agree	Strongly agree	Strongly agree	Strongly agree	Strongly agree	Agree	Strongly agree	Strongly agree	Agree	Agree	Agree	Agree	Strongly agree	Agree	Agree	Agree	Strongly agree	Strongly agree	Agree	Agree	Agree	Strongly disagree	Agree
Waikato Region	Disagree	Agree	Agree	Agree	Disagree	Disagree	Strongly agree	Disagree	Agree	Disagree	Agree	Agree	Agree	Disagree	Disagree	Disagree	Agree	Agree	Agree	Disagree	Disagree	Agree	Agree	Disagree	Disagree	Disagree	Disagree	Disagree	Disagree	Disagree	Disagree	Disagree	Agree	Disagree	Disagree	Agree	Disagree	Agree	Disagree	Agree	Agree	Agree	Agree	Agree	Disagree	Strongly agree	Strongly agree	Disagree	Strongly agree
Waikato Region	Strongly disagree	Strongly disagree	Disagree	Agree	Strongly disagree	Disagree	Disagree	Disagree	Agree	Agree	Unsure/neutral	Unsure/neutral	Agree	Strongly disagree	Agree	Agree	Agree	Agree	Agree	Agree	Agree	Agree	Agree	Agree	Agree	Agree	Unsure/neutral	Disagree	Disagree	Agree	Agree	Agree	Agree	Unsure/neutral	Agree	Agree	Disagree	Disagree	Disagree	Agree	Agree	Strongly disagree	Agree	Agree	Strongly disagree	Agree	Unsure/neutral	Disagree	Agree
Waikato Region	Strongly disagree	Strongly disagree	Strongly disagree	Agree	Strongly disagree	Strongly disagree	Strongly agree	Strongly disagree	Strongly agree	Disagree	Strongly agree	Agree	Agree	Strongly disagree	Strongly agree	Strongly agree	Unsure/neutral	Agree	Agree	Agree	Strongly agree	Strongly agree	Strongly agree	Strongly agree	Agree	Strongly agree	Strongly agree	Strongly agree	Strongly agree	Strongly agree	Strongly agree	Agree	Strongly agree	Strongly agree	Agree	Strongly agree	Strongly agree	Strongly agree	Strongly agree	Strongly agree	Strongly agree	Strongly disagree	Strongly agree	Strongly agree	Strongly disagree	Strongly agree	Strongly agree	Strongly disagree	Strongly agree
Wellington Region	Disagree	Strongly disagree	Disagree	Disagree	Strongly disagree	Strongly disagree	Agree	Strongly disagree	Agree	Disagree	Agree	Unsure/neutral	Agree	Strongly disagree	Agree	Strongly agree	Unsure/neutral	Agree	Strongly agree	Agree	Strongly agree	Agree	Agree	Strongly agree	Agree	Unsure/neutral	Agree	Agree	Unsure/neutral	Agree	Agree	Agree	Strongly agree	Agree	Unsure/neutral	Agree	Unsure/neutral	Agree	Unsure/neutral	Agree	Agree	Disagree	Agree	Agree	Disagree	Agree	Agree	Strongly disagree	Agree
Tasman/ Nelson Region	Unsure/neutral	Unsure/neutral	Unsure/neutral	Strongly agree	Unsure/neutral	Unsure/neutral	Unsure/neutral	Unsure/neutral	Strongly disagree	Unsure/neutral	Disagree	Strongly disagree	Disagree	Strongly disagree	Disagree	Strongly disagree	Agree	Agree	Strongly agree	Strongly disagree	Strongly disagree	Strongly disagree	Strongly disagree	Strongly disagree	Strongly disagree	Strongly disagree	Strongly disagree	Strongly disagree	Unsure/neutral	Strongly disagree	Strongly disagree	Strongly agree	Strongly disagree	Strongly disagree	Strongly disagree	Strongly disagree	Strongly disagree	Strongly disagree	Strongly disagree	Strongly disagree	Strongly disagree	Strongly disagree	Strongly disagree	Strongly disagree	Strongly disagree	Strongly disagree	Strongly disagree	Strongly agree	Strongly disagree
Auckland Region	Strongly disagree	Strongly disagree	Disagree	Disagree	Strongly disagree	Disagree	Strongly agree	Strongly disagree	Strongly agree	Disagree	Agree	Agree	Agree	Disagree	Agree	Unsure/neutral	Unsure/neutral	Agree	Agree	Agree	Agree	Strongly agree	Unsure/neutral	Agree	Unsure/neutral	Agree	Unsure/neutral	Agree	Agree	Agree	Agree	Strongly agree	Agree	Agree	Strongly agree	Disagree	Disagree	Unsure/neutral	Disagree	Unsure/neutral	Unsure/neutral	Agree	Agree	Unsure/neutral	Unsure/neutral	Disagree	Disagree	Unsure/neutral	Unsure/neutral
Wellington Region	Disagree	Disagree	Disagree	Disagree	Disagree	Disagree	Disagree	Disagree	Agree	Disagree	Agree	Unsure/neutral	Agree	Disagree	Agree	Agree	Disagree	Disagree	Agree	Agree	Agree	Agree	Agree	Agree	Unsure/neutral	Agree	Agree	Agree	Agree	Agree	Agree	Agree	Agree	Agree	Agree	Agree	Agree	Agree	Agree	Agree	Agree	Disagree	Agree	Agree	Disagree	Agree	Agree	Disagree	Agree
Bay of Plenty Region	Strongly disagree	Strongly disagree	Strongly disagree	Strongly disagree	Strongly disagree	Strongly disagree	Agree	Strongly disagree	Agree	Disagree	Agree	Agree	Agree	Strongly disagree	Agree	Strongly agree	Disagree	Disagree	Disagree	Strongly agree	Agree	Strongly agree	Strongly agree	Strongly agree	Agree	Agree	Agree	Agree	Agree	Agree	Agree	Unsure/neutral	Strongly agree	Agree	Disagree	Agree	Agree	Agree	Agree	Agree	Agree	Disagree	Agree	Agree	Disagree	Strongly agree	Strongly agree	Strongly disagree	Strongly agree
Auckland Region	Strongly disagree	Disagree	Strongly disagree	Unsure/neutral	Strongly disagree	Strongly disagree	Agree	Disagree	Disagree	Disagree	Unsure/neutral	Disagree	Agree	Strongly disagree	Agree	Agree	Unsure/neutral	Disagree	Agree	Agree	Strongly agree	Agree	Strongly agree	Strongly agree	Strongly agree	Unsure/neutral	Unsure/neutral	Agree	Unsure/neutral	Unsure/neutral	Agree	Strongly agree	Agree	Agree	Strongly agree	Unsure/neutral	Unsure/neutral	Unsure/neutral	Unsure/neutral	Agree	Agree	Unsure/neutral	Agree	Unsure/neutral	Unsure/neutral	Strongly agree	Strongly agree	Strongly disagree	Strongly agree
Otago Region	Disagree	Disagree	Strongly disagree	Disagree	Unsure/neutral	Disagree	Agree	Disagree	Agree	Disagree	Agree	Unsure/neutral	Strongly agree	Strongly disagree	Strongly agree	Strongly agree	Agree	Unsure/neutral	Agree	Agree	Strongly agree	Agree	Agree	Strongly agree	Agree	Agree	Agree	Agree	Unsure/neutral	Unsure/neutral	Strongly agree	Strongly agree	Unsure/neutral	Agree	Strongly agree	Agree	Unsure/neutral	Agree	Unsure/neutral	Strongly agree	Agree	Strongly agree	Agree	Agree	Agree	Strongly agree	Agree	Strongly disagree	Strongly agree
Auckland Region	Strongly disagree	Disagree	Strongly disagree	Strongly agree	Disagree	Disagree	Agree	Disagree	Agree	Agree	Disagree	Agree	Agree	Strongly disagree	Disagree	Disagree	Agree	Agree	Agree	Agree	Unsure/neutral	Disagree	Agree	Agree	Agree	Disagree	Agree	Strongly disagree	Agree	Agree	Disagree	Agree	Disagree	Disagree	Agree	Disagree	Strongly disagree	Disagree	Unsure/neutral	Agree	Disagree	Disagree	Unsure/neutral	Disagree	Disagree	Disagree	Disagree	Disagree	Agree
Marlborough Region	Strongly disagree	Agree	Disagree	Strongly agree	Disagree	Unsure/neutral	Unsure/neutral	Strongly disagree	Unsure/neutral	Unsure/neutral	Disagree	Unsure/neutral	Unsure/neutral	Strongly disagree	Disagree	Disagree	Strongly agree	Strongly agree	Strongly agree	Disagree	Disagree	Disagree	Disagree	Disagree	Disagree	Unsure/neutral	Disagree	Disagree	Unsure/neutral	Agree	Disagree	Unsure/neutral	Agree	Unsure/neutral	Unsure/neutral	Strongly disagree	Strongly disagree	Strongly disagree	Disagree	Agree	Strongly disagree	Disagree	Agree	Strongly disagree	Strongly disagree	Strongly disagree	Strongly disagree	Strongly disagree	Strongly disagree
Tasman/ Nelson Region	Strongly disagree	Strongly disagree	Strongly disagree	Strongly disagree	Disagree	Strongly disagree	Strongly agree	Strongly disagree	Disagree	Strongly disagree	Strongly agree	Agree	Unsure/neutral	Strongly disagree	Strongly agree	Strongly agree	Strongly disagree	Strongly disagree	Unsure/neutral	Strongly agree	Strongly agree	Strongly agree	Strongly agree	Strongly agree	Strongly agree	Agree	Strongly agree	Strongly agree	Unsure/neutral	Strongly agree	Strongly agree	Unsure/neutral	Strongly agree	Strongly agree	Agree	Agree	Unsure/neutral	Agree	Unsure/neutral	Agree	Agree	Disagree	Strongly agree	Agree	Unsure/neutral	Strongly agree	Strongly agree	Strongly disagree	Agree
Wellington Region	Disagree	Disagree	Strongly disagree	Disagree	Strongly disagree	Strongly disagree	Agree	Strongly disagree	Disagree	Disagree	Strongly agree	Unsure/neutral	Unsure/neutral	Strongly disagree	Agree	Agree	Strongly disagree	Disagree	Unsure/neutral	Agree	Agree	Agree	Agree	Agree	Agree	Unsure/neutral	Agree	Unsure/neutral	Agree	Unsure/neutral	Agree	Disagree	Agree	Agree	Disagree	Unsure/neutral	Disagree	Unsure/neutral	Unsure/neutral	Unsure/neutral	Agree	Disagree	Unsure/neutral	Unsure/neutral	Disagree	Agree	Agree	Strongly disagree	Agree
Waikato Region	Disagree	Disagree	Disagree	Disagree	Disagree	Disagree	Agree	Disagree	Agree	Agree	Agree	Agree	Agree	Disagree	Agree	Unsure/neutral	Unsure/neutral	Unsure/neutral	Unsure/neutral	Agree	Agree	Agree	Agree	Agree	Agree	Agree	Agree	Agree	Unsure/neutral	Agree	Agree	Agree	Agree	Agree	Agree	Agree	Agree	Agree	Agree	Agree	Agree	Agree	Agree	Agree	Disagree	Agree	Agree	Disagree	Agree
Auckland Region	Strongly disagree	Strongly disagree	Strongly disagree	Agree	Strongly disagree	Disagree	Strongly agree	Disagree	Unsure/neutral	Strongly disagree	Disagree	Unsure/neutral	Agree	Strongly disagree	Strongly disagree	Disagree	Disagree	Strongly disagree	Agree	Strongly disagree	Agree	Agree	Agree	Agree	Agree	Unsure/neutral	Agree	Strongly disagree	Disagree	Agree	Unsure/neutral	Unsure/neutral	Agree	Unsure/neutral	Disagree	Disagree	Unsure/neutral	Disagree	Unsure/neutral	Agree	Disagree	Disagree	Agree	Unsure/neutral	Disagree	Unsure/neutral	Unsure/neutral	Unsure/neutral	Unsure/neutral
Auckland Region	Strongly disagree	Strongly disagree	Strongly disagree	Disagree	Strongly disagree	Disagree	Agree	Strongly disagree	Agree	Disagree	Agree	Agree	Unsure/neutral	Strongly disagree	Agree	Strongly agree	Disagree	Disagree	Agree	Strongly agree	Strongly agree	Strongly agree	Strongly agree	Strongly agree	Strongly agree	Strongly agree	Agree	Strongly agree	Unsure/neutral	Agree	Strongly agree	Strongly agree	Agree	Strongly agree	Strongly agree	Strongly agree	Agree	Agree	Unsure/neutral	Agree	Agree	Agree	Agree	Agree	Agree	Strongly agree	Strongly agree	Strongly disagree	Strongly agree
Canterbury Region	Disagree	Disagree	Disagree	Agree	Unsure/neutral	Agree	Agree	Disagree	Agree	Agree	Disagree	Agree	Agree	Unsure/neutral	Unsure/neutral	Unsure/neutral	Agree	Agree	Agree	Unsure/neutral	Agree	Agree	Agree	Agree	Unsure/neutral	Unsure/neutral	Unsure/neutral	Disagree	Unsure/neutral	Unsure/neutral	Unsure/neutral	Disagree	Disagree	Unsure/neutral	Disagree	Disagree	Unsure/neutral	Unsure/neutral	Disagree	Disagree	Unsure/neutral	Disagree	Disagree	Disagree	Unsure/neutral	Unsure/neutral	Unsure/neutral	Disagree	Unsure/neutral
Bay of Plenty Region	Disagree	Agree	Strongly disagree	Disagree	Disagree	Disagree	Agree	Disagree	Agree	Disagree	Agree	Agree	Agree	Disagree	Agree	Agree	Disagree	Disagree	Agree	Agree	Agree	Agree	Agree	Agree	Agree	Agree	Agree	Unsure/neutral	Agree	Unsure/neutral	Agree	Agree	Unsure/neutral	Agree	Unsure/neutral	Agree	Disagree	Unsure/neutral	Disagree	Unsure/neutral	Agree	Disagree	Unsure/neutral	Agree	Disagree	Agree	Agree	Disagree	Agree
Auckland Region	Strongly disagree	Disagree	Strongly disagree	Strongly disagree	Disagree	Strongly agree	Agree	Strongly disagree	Unsure/neutral	Disagree	Agree	Agree	Agree	Strongly disagree	Strongly agree	Agree	Strongly disagree	Strongly disagree	Agree	Agree	Strongly agree	Strongly agree	Strongly agree	Strongly agree	Strongly agree	Agree	Strongly agree	Strongly agree	Agree	Unsure/neutral	Strongly agree	Agree	Agree	Strongly agree	Agree	Agree	Agree	Agree	Strongly agree	Unsure/neutral	Agree	Disagree	Agree	Strongly agree	Strongly disagree	Strongly agree	Strongly agree	Strongly disagree	Strongly agree
Wellington Region	Strongly disagree	Disagree	Strongly disagree	Disagree	Strongly disagree	Strongly disagree	Agree	Strongly disagree	Unsure/neutral	Disagree	Agree	Agree	Agree	Disagree	Agree	Agree	Unsure/neutral	Disagree	Agree	Agree	Agree	Agree	Agree	Agree	Agree	Unsure/neutral	Agree	Disagree	Unsure/neutral	Unsure/neutral	Unsure/neutral	Strongly agree	Agree	Agree	Agree	Agree	Unsure/neutral	Unsure/neutral	Unsure/neutral	Agree	Agree	Disagree	Agree	Unsure/neutral	Disagree	Agree	Agree	Disagree	Agree
Wellington Region	Strongly disagree	Disagree	Strongly disagree	Unsure/neutral	Strongly disagree	Strongly disagree	Strongly agree	Unsure/neutral	Agree	Disagree	Agree	Agree	Agree	Strongly disagree	Strongly agree	Strongly agree	Unsure/neutral	Agree	Strongly agree	Strongly agree	Strongly agree	Agree	Agree	Strongly agree	Agree	Agree	Agree	Unsure/neutral	Strongly agree	Agree	Agree	Agree	Agree	Agree	Agree	Agree	Agree	Disagree	Unsure/neutral	Agree	Agree	Strongly disagree	Agree	Agree	Strongly disagree	Agree	Agree	Disagree	Agree
Otago Region	Strongly disagree	Strongly disagree	Strongly disagree	Strongly disagree	Strongly disagree	Disagree	Strongly agree	Disagree	Agree	Disagree	Agree	Strongly agree	Strongly agree	Strongly disagree	Strongly agree	Strongly agree	Disagree	Disagree	Disagree	Strongly agree	Strongly agree	Strongly agree	Agree	Strongly agree	Agree	Agree	Strongly agree	Agree	Agree	Agree	Strongly agree	Strongly agree	Agree	Agree	Agree	Unsure/neutral	Agree	Agree	Agree	Agree	Agree	Agree	Agree	Agree	Agree	Strongly agree	Strongly agree	Strongly disagree	Strongly agree
West Coast Region	Strongly disagree	Disagree	Strongly disagree	Agree	Strongly disagree	Disagree	Strongly agree	Disagree	Agree	Disagree	Unsure/neutral	Agree	Agree	Strongly disagree	Unsure/neutral	Disagree	Unsure/neutral	Disagree	Strongly agree	Agree	Agree	Agree	Unsure/neutral	Agree	Unsure/neutral	Unsure/neutral	Unsure/neutral	Disagree	Unsure/neutral	Strongly disagree	Unsure/neutral	Strongly agree	Strongly disagree	Unsure/neutral	Agree	Agree	Disagree	Unsure/neutral	Disagree	Agree	Agree	Disagree	Unsure/neutral	Unsure/neutral	Disagree	Agree	Agree	Disagree	Agree
Wellington Region	Strongly disagree	Disagree	Strongly disagree	Strongly disagree	Strongly disagree	Disagree	Agree	Strongly disagree	Agree	Disagree	Strongly agree	Unsure/neutral	Disagree	Strongly disagree	Agree	Unsure/neutral	Unsure/neutral	Agree	Agree	Agree	Agree	Unsure/neutral	Disagree	Agree	Disagree	Unsure/neutral	Unsure/neutral	Unsure/neutral	Unsure/neutral	Unsure/neutral	Agree	Disagree	Unsure/neutral	Unsure/neutral	Disagree	Disagree	Unsure/neutral	Unsure/neutral	Unsure/neutral	Unsure/neutral	Unsure/neutral	Disagree	Unsure/neutral	Unsure/neutral	Disagree	Unsure/neutral	Unsure/neutral	Unsure/neutral	Unsure/neutral
Canterbury Region	Strongly disagree	Disagree	Strongly disagree	Agree	Disagree	Disagree	Agree	Disagree	Agree	Disagree	Disagree	Unsure/neutral	Agree	Strongly disagree	Disagree	Unsure/neutral	Agree	Unsure/neutral	Strongly agree	Unsure/neutral	Agree	Disagree	Agree	Agree	Disagree	Agree	Agree	Agree	Agree	Agree	Agree	Agree	Agree	Agree	Agree	Disagree	Disagree	Disagree	Agree	Unsure/neutral	Agree	Unsure/neutral	Agree	Agree	Disagree	Agree	Unsure/neutral	Disagree	Agree
Otago Region	Strongly disagree	Disagree	Strongly disagree	Disagree	Strongly disagree	Unsure/neutral	Agree	Strongly disagree	Agree	Disagree	Strongly agree	Unsure/neutral	Strongly agree	Strongly disagree	Agree	Agree	Unsure/neutral	Disagree	Agree	Agree	Agree	Agree	Agree	Agree	Agree	Unsure/neutral	Agree	Unsure/neutral	Disagree	Unsure/neutral	Agree	Agree	Unsure/neutral	Unsure/neutral	Agree	Disagree	Unsure/neutral	Disagree	Disagree	Unsure/neutral	Unsure/neutral	Agree	Unsure/neutral	Disagree	Agree	Agree	Agree	Disagree	Unsure/neutral
Wellington Region	Strongly disagree	Unsure/neutral	Strongly disagree	Strongly disagree	Strongly disagree	Disagree	Strongly agree	Strongly disagree	Strongly agree	Unsure/neutral	Agree	Agree	Strongly agree	Strongly disagree	Strongly agree	Agree	Unsure/neutral	Disagree	Disagree	Strongly agree	Strongly agree	Strongly agree	Strongly agree	Strongly agree	Strongly agree	Strongly agree	Strongly agree	Strongly agree	Agree	Strongly agree	Strongly agree	Strongly agree	Strongly agree	Strongly agree	Strongly agree	Agree	Agree	Agree	Agree	Strongly agree	Agree	Agree	Strongly agree	Agree	Agree	Agree	Agree	Disagree	Agree
Otago Region	Strongly disagree	Unsure/neutral	Strongly disagree	Disagree	Strongly disagree	Strongly disagree	Agree	Strongly disagree	Agree	Disagree	Agree	Agree	Strongly agree	Strongly disagree	Strongly agree	Strongly agree	Disagree	Disagree	Strongly agree	Strongly agree	Strongly agree	Strongly agree	Strongly agree	Strongly agree	Strongly agree	Unsure/neutral	Strongly agree	Agree	Strongly agree	Agree	Agree	Agree	Agree	Strongly agree	Agree	Agree	Agree	Strongly agree	Strongly agree	Agree	Strongly agree	Strongly disagree	Agree	Strongly agree	Disagree	Strongly agree	Strongly agree	Strongly disagree	Strongly agree
Manawatu-Whanganui Region	Disagree	Agree	Strongly disagree	Unsure/neutral	Disagree	Strongly disagree	Agree	Disagree	Unsure/neutral	Agree	Disagree	Unsure/neutral	Agree	Disagree	Agree	Agree	Unsure/neutral	Unsure/neutral	Agree	Unsure/neutral	Unsure/neutral	Agree	Unsure/neutral	Agree	Agree	Agree	Unsure/neutral	Unsure/neutral	Disagree	Unsure/neutral	Unsure/neutral	Agree	Unsure/neutral	Agree	Agree	Agree	Disagree	Disagree	Disagree	Unsure/neutral	Agree	Disagree	Unsure/neutral	Agree	Disagree	Agree	Agree	Disagree	Agree
Auckland Region	Strongly disagree	Disagree	Strongly disagree	Strongly disagree	Strongly disagree	Disagree	Strongly disagree	Strongly disagree	Agree	Strongly disagree	Unsure/neutral	Strongly agree	Strongly agree	Strongly disagree	Strongly agree	Strongly agree	Disagree	Disagree	Agree	Strongly agree	Strongly agree	Strongly agree	Strongly agree	Strongly agree	Strongly agree	Strongly agree	Strongly agree	Agree	Strongly agree	Agree	Strongly agree	Agree	Agree	Agree	Disagree	Agree	Agree	Strongly agree	Strongly agree	Strongly agree	Strongly agree	Strongly disagree	Strongly agree	Strongly agree	Strongly disagree	Strongly agree	Strongly agree	Strongly disagree	Strongly agree
Canterbury Region	Strongly disagree	Disagree	Strongly disagree	Unsure/neutral	Disagree	Disagree	Disagree	Disagree	Unsure/neutral	Disagree	Agree	Unsure/neutral	Agree	Strongly disagree	Unsure/neutral	Agree	Disagree	Disagree	Disagree	Strongly agree	Agree	Agree	Agree	Agree	Agree	Agree	Agree	Agree	Agree	Unsure/neutral	Agree	Unsure/neutral	Unsure/neutral	Agree	Agree	Agree	Agree	Agree	Agree	Unsure/neutral	Agree	Disagree	Unsure/neutral	Agree	Disagree	Agree	Agree	Disagree	Agree
Hawke's Bay Region	Strongly disagree	Unsure/neutral	Strongly disagree	Unsure/neutral	Strongly disagree	Disagree	Agree	Strongly disagree	Unsure/neutral	Disagree	Agree	Unsure/neutral	Unsure/neutral	Strongly disagree	Agree	Agree	Unsure/neutral	Disagree	Strongly agree	Agree	Strongly agree	Agree	Strongly agree	Strongly agree	Agree	Unsure/neutral	Agree	Disagree	Disagree	Agree	Agree	Agree	Unsure/neutral	Agree	Unsure/neutral	Unsure/neutral	Disagree	Unsure/neutral	Disagree	Agree	Agree	Disagree	Unsure/neutral	Agree	Disagree	Strongly agree	Strongly agree	Strongly disagree	Agree
Canterbury Region	Disagree	Disagree	Strongly disagree	Unsure/neutral	Disagree	Disagree	Agree	Disagree	Agree	Disagree	Unsure/neutral	Unsure/neutral	Unsure/neutral	Disagree	Agree	Agree	Unsure/neutral	Disagree	Unsure/neutral	Agree	Agree	Agree	Agree	Agree	Agree	Unsure/neutral	Unsure/neutral	Agree	Disagree	Agree	Agree	Disagree	Agree	Agree	Agree	Unsure/neutral	Unsure/neutral	Agree	Unsure/neutral	Agree	Agree	Disagree	Agree	Agree	Disagree	Agree	Agree	Disagree	Agree
Auckland Region	Strongly disagree	Disagree	Strongly disagree	Strongly disagree	Disagree	Strongly disagree	Strongly agree	Strongly disagree	Agree	Strongly disagree	Strongly agree	Strongly disagree	Agree	Strongly disagree	Strongly agree	Strongly agree	Strongly disagree	Strongly disagree	Strongly agree	Strongly agree	Strongly agree	Strongly agree	Strongly agree	Strongly agree	Strongly agree	Strongly agree	Strongly agree	Strongly agree	Strongly agree	Strongly agree	Strongly agree	Strongly agree	Strongly agree	Strongly agree	Agree	Strongly agree	Strongly agree	Strongly agree	Strongly agree	Strongly agree	Strongly agree	Strongly agree	Strongly agree	Strongly agree	Strongly agree	Strongly agree	Strongly agree	Strongly disagree	Strongly agree
Northland Region	Strongly disagree	Unsure/neutral	Strongly disagree	Unsure/neutral	Strongly disagree	Strongly disagree	Strongly agree	Strongly disagree	Strongly agree	Agree	Unsure/neutral	Unsure/neutral	Unsure/neutral	Strongly disagree	Strongly agree	Strongly agree	Disagree	Disagree	Strongly agree	Strongly agree	Strongly agree	Strongly agree	Strongly agree	Strongly agree	Strongly agree	Agree	Strongly agree	Agree	Agree	Strongly agree	Strongly agree	Disagree	Agree	Agree	Disagree	Strongly agree	Agree	Strongly agree	Strongly agree	Strongly agree	Strongly agree	Strongly disagree	Agree	Strongly agree	Disagree	Strongly agree	Strongly agree	Strongly disagree	Strongly agree
Waikato Region	Disagree	Disagree	Strongly disagree	Unsure/neutral	Disagree	Disagree	Unsure/neutral	Disagree	Disagree	Disagree	Strongly agree	Agree	Agree	Strongly disagree	Agree	Agree	Disagree	Disagree	Agree	Agree	Agree	Agree	Agree	Agree	Agree	Unsure/neutral	Agree	Unsure/neutral	Agree	Unsure/neutral	Strongly agree	Agree	Agree	Strongly agree	Disagree	Agree	Unsure/neutral	Strongly agree	Unsure/neutral	Agree	Strongly agree	Disagree	Agree	Strongly agree	Disagree	Agree	Agree	Strongly disagree	Agree
Waikato Region	Strongly disagree	Agree	Strongly disagree	Unsure/neutral	Strongly agree	Strongly agree	Strongly agree	Strongly disagree	Strongly agree	Unsure/neutral	Agree	Agree	Agree	Strongly agree	Strongly agree	Strongly agree	Strongly disagree	Disagree	Agree	Strongly agree	Strongly agree	Strongly agree	Strongly agree	Strongly agree	Strongly agree	Strongly agree	Strongly agree	Strongly agree	Strongly agree	Agree	Strongly agree	Strongly disagree	Disagree	Strongly agree	Disagree	Strongly agree	Strongly agree	Strongly agree	Strongly agree	Strongly agree	Strongly agree	Disagree	Strongly agree	Strongly agree	Disagree	Strongly agree	Strongly agree	Strongly disagree	Strongly agree
Auckland Region	Disagree	Disagree	Unsure/neutral	Agree	Unsure/neutral	Unsure/neutral	Agree	Unsure/neutral	Agree	Agree	Unsure/neutral	Unsure/neutral	Disagree	Disagree	Unsure/neutral	Agree	Agree	Agree	Agree	Unsure/neutral	Unsure/neutral	Disagree	Unsure/neutral	Unsure/neutral	Disagree	Disagree	Disagree	Unsure/neutral	Agree	Unsure/neutral	Disagree	Disagree	Unsure/neutral	Disagree	Disagree	Agree	Unsure/neutral	Disagree	Unsure/neutral	Unsure/neutral	Agree	Disagree	Agree	Unsure/neutral	Disagree	Disagree	Agree	Unsure/neutral	Agree
Auckland Region	Strongly disagree	Strongly disagree	Strongly disagree	Disagree	Strongly disagree	Strongly disagree	Strongly agree	Disagree	Disagree	Strongly disagree	Agree	Agree	Strongly agree	Strongly disagree	Strongly agree	Strongly agree	Strongly disagree	Disagree	Strongly agree	Strongly agree	Strongly agree	Strongly agree	Strongly agree	Strongly agree	Strongly agree	Agree	Agree	Agree	Strongly agree	Agree	Strongly agree	Agree	Disagree	Strongly agree	Agree	Agree	Disagree	Agree	Agree	Strongly disagree	Strongly agree	Strongly disagree	Agree	Agree	Strongly disagree	Strongly agree	Strongly agree	Strongly disagree	Strongly agree
Marlborough Region	Strongly disagree	Disagree	Unsure/neutral	Agree	Disagree	Agree	Agree	Disagree	Agree	Disagree	Unsure/neutral	Unsure/neutral	Agree	Strongly disagree	Agree	Agree	Unsure/neutral	Unsure/neutral	Strongly agree	Strongly agree	Agree	Agree	Agree	Agree	Unsure/neutral	Agree	Strongly agree	Strongly agree	Unsure/neutral	Agree	Strongly agree	Agree	Agree	Agree	Agree	Agree	Unsure/neutral	Disagree	Disagree	Disagree	Unsure/neutral	Unsure/neutral	Unsure/neutral	Unsure/neutral	Disagree	Disagree	Disagree	Agree	Disagree
Bay of Plenty Region	Strongly disagree	Disagree	Strongly disagree	Disagree	Strongly disagree	Strongly disagree	Agree	Disagree	Agree	Disagree	Agree	Agree	Disagree	Disagree	Agree	Agree	Disagree	Disagree	Disagree	Agree	Agree	Strongly agree	Strongly agree	Strongly agree	Strongly agree	Agree	Strongly agree	Unsure/neutral	Agree	Agree	Strongly agree	Agree	Agree	Strongly agree	Agree	Agree	Strongly agree	Unsure/neutral	Agree	Agree	Agree	Agree	Agree	Agree	Agree	Agree	Agree	Strongly disagree	Agree
Auckland Region	Strongly disagree	Disagree	Strongly disagree	Disagree	Disagree	Disagree	Strongly agree	Strongly disagree	Agree	Disagree	Agree	Agree	Strongly agree	Strongly disagree	Agree	Agree	Disagree	Unsure/neutral	Strongly agree	Agree	Agree	Agree	Agree	Agree	Agree	Strongly disagree	Agree	Unsure/neutral	Agree	Unsure/neutral	Unsure/neutral	Strongly agree	Unsure/neutral	Unsure/neutral	Strongly agree	Disagree	Disagree	Agree	Agree	Agree	Agree	Strongly disagree	Agree	Agree	Strongly disagree	Strongly agree	Strongly agree	Strongly disagree	Strongly agree
Hawke's Bay Region	Strongly disagree	Disagree	Strongly disagree	Unsure/neutral	Disagree	Disagree	Strongly agree	Disagree	Agree	Disagree	Agree	Unsure/neutral	Strongly agree	Strongly disagree	Strongly agree	Agree	Unsure/neutral	Unsure/neutral	Unsure/neutral	Strongly agree	Agree	Agree	Agree	Unsure/neutral	Agree	Unsure/neutral	Unsure/neutral	Unsure/neutral	Agree	Unsure/neutral	Agree	Unsure/neutral	Unsure/neutral	Agree	Unsure/neutral	Agree	Unsure/neutral	Agree	Unsure/neutral	Unsure/neutral	Agree	Unsure/neutral	Agree	Agree	Agree	Strongly agree	Strongly agree	Strongly disagree	Strongly agree
Marlborough Region	Strongly disagree	Unsure/neutral	Strongly disagree	Unsure/neutral	Strongly disagree	Agree	Strongly agree	Strongly disagree	Agree	Disagree	Strongly agree	Strongly agree	Agree	Disagree	Strongly agree	Strongly agree	Unsure/neutral	Disagree	Strongly agree	Agree	Strongly agree	Agree	Strongly agree	Strongly agree	Agree	Strongly agree	Agree	Agree	Agree	Unsure/neutral	Agree	Disagree	Unsure/neutral	Strongly agree	Agree	Agree	Agree	Unsure/neutral	Strongly agree	Agree	Strongly agree	Disagree	Strongly agree	Agree	Disagree	Strongly agree	Strongly agree	Strongly disagree	Strongly agree
Auckland Region	Unsure/neutral	Unsure/neutral	Agree	Strongly agree	Unsure/neutral	Agree	Agree	Agree	Unsure/neutral	Unsure/neutral	Disagree	Unsure/neutral	Unsure/neutral	Strongly disagree	Unsure/neutral	Disagree	Agree	Agree	Unsure/neutral	Unsure/neutral	Agree	Agree	Agree	Unsure/neutral	Agree	Unsure/neutral	Agree	Unsure/neutral	Disagree	Agree	Agree	Unsure/neutral	Unsure/neutral	Unsure/neutral	Unsure/neutral	Strongly disagree	Strongly disagree	Strongly disagree	Unsure/neutral	Unsure/neutral	Strongly disagree	Unsure/neutral	Disagree	Disagree	Strongly disagree	Disagree	Strongly disagree	Strongly agree	Disagree
Auckland Region	Unsure/neutral	Agree	Agree	Strongly agree	Agree	Agree	Unsure/neutral	Agree	Disagree	Agree	Disagree	Disagree	Strongly disagree	Strongly disagree	Strongly disagree	Unsure/neutral	Agree	Agree	Agree	Disagree	Disagree	Disagree	Disagree	Disagree	Disagree	Disagree	Strongly disagree	Strongly disagree	Agree	Disagree	Disagree	Disagree	Unsure/neutral	Disagree	Unsure/neutral	Disagree	Disagree	Strongly disagree	Disagree	Unsure/neutral	Strongly disagree	Disagree	Unsure/neutral	Disagree	Disagree	Disagree	Disagree	Agree	Disagree
Canterbury Region	Strongly disagree	Disagree	Strongly disagree	Strongly disagree	Strongly disagree	Strongly disagree	Agree	Strongly disagree	Unsure/neutral	Strongly disagree	Agree	Agree	Agree	Strongly disagree	Agree	Agree	Unsure/neutral	Unsure/neutral	Agree	Strongly agree	Strongly agree	Strongly agree	Strongly agree	Strongly agree	Strongly agree	Strongly agree	Strongly agree	Agree	Unsure/neutral	Strongly agree	Agree	Agree	Strongly agree	Agree	Agree	Unsure/neutral	Unsure/neutral	Agree	Disagree	Agree	Agree	Disagree	Strongly agree	Agree	Disagree	Agree	Strongly agree	Strongly disagree	Agree
Tasman/ Nelson Region	Strongly disagree	Strongly disagree	Strongly disagree	Disagree	Strongly disagree	Strongly disagree	Strongly agree	Strongly disagree	Strongly agree	Disagree	Unsure/neutral	Unsure/neutral	Strongly agree	Strongly disagree	Unsure/neutral	Disagree	Strongly agree	Strongly agree	Agree	Unsure/neutral	Agree	Agree	Agree	Agree	Agree	Unsure/neutral	Unsure/neutral	Disagree	Agree	Unsure/neutral	Unsure/neutral	Agree	Unsure/neutral	Unsure/neutral	Agree	Unsure/neutral	Unsure/neutral	Unsure/neutral	Unsure/neutral	Unsure/neutral	Unsure/neutral	Disagree	Unsure/neutral	Agree	Disagree	Agree	Agree	Disagree	Agree
Auckland Region	Strongly disagree	Disagree	Strongly disagree	Strongly disagree	Strongly disagree	Strongly agree	Agree	Strongly disagree	Agree	Strongly disagree	Agree	Disagree	Agree	Strongly disagree	Strongly agree	Strongly agree	Strongly disagree	Strongly disagree	Strongly agree	Strongly agree	Strongly agree	Strongly agree	Strongly agree	Strongly agree	Strongly agree	Strongly agree	Strongly agree	Strongly agree	Unsure/neutral	Strongly agree	Strongly agree	Strongly agree	Strongly agree	Strongly agree	Strongly agree	Strongly agree	Strongly agree	Strongly agree	Strongly agree	Strongly agree	Strongly agree	Strongly disagree	Strongly agree	Strongly agree	Strongly disagree	Strongly agree	Strongly agree	Strongly disagree	Strongly agree
Wellington Region	Strongly disagree	Strongly disagree	Strongly disagree	Strongly disagree	Strongly disagree	Strongly disagree	Strongly agree	Strongly disagree	Agree	Strongly disagree	Strongly agree	Strongly agree	Strongly agree	Strongly disagree	Strongly agree	Agree	Strongly disagree	Strongly disagree	Strongly disagree	Strongly agree	Strongly agree	Strongly agree	Strongly agree	Strongly agree	Strongly agree	Strongly agree	Strongly agree	Strongly agree	Strongly agree	Agree	Strongly agree	Disagree	Strongly agree	Strongly agree	Disagree	Strongly agree	Strongly agree	Strongly agree	Strongly agree	Strongly agree	Strongly agree	Strongly disagree	Strongly agree	Strongly agree	Strongly disagree	Strongly agree	Strongly agree	Strongly disagree	Strongly agree
Wellington Region	Strongly disagree	Strongly disagree	Strongly disagree	Strongly disagree	Strongly disagree	Disagree	Agree	Strongly disagree	Disagree	Disagree	Agree	Agree	Agree	Strongly disagree	Strongly agree	Agree	Strongly disagree	Disagree	Unsure/neutral	Strongly agree	Agree	Agree	Strongly agree	Strongly agree	Strongly agree	Agree	Agree	Unsure/neutral	Agree	Agree	Agree	Agree	Unsure/neutral	Strongly agree	Agree	Unsure/neutral	Agree	Agree	Agree	Agree	Agree	Agree	Agree	Agree	Agree	Strongly agree	Agree	Strongly disagree	Agree
Tasman/ Nelson Region	Disagree	Disagree	Strongly disagree	Disagree	Disagree	Disagree	Agree	Disagree	Agree	Disagree	Agree	Agree	Agree	Disagree	Agree	Agree	Disagree	Disagree	Disagree	Agree	Agree	Agree	Agree	Agree	Agree	Unsure/neutral	Unsure/neutral	Disagree	Agree	Unsure/neutral	Agree	Agree	Unsure/neutral	Unsure/neutral	Agree	Agree	Agree	Agree	Agree	Unsure/neutral	Agree	Agree	Unsure/neutral	Agree	Agree	Strongly agree	Strongly agree	Disagree	Strongly agree
Auckland Region	Strongly disagree	Disagree	Strongly disagree	Strongly disagree	Strongly disagree	Disagree	Strongly agree	Strongly disagree	Unsure/neutral	Disagree	Strongly agree	Agree	Agree	Strongly disagree	Strongly agree	Strongly agree	Strongly disagree	Disagree	Agree	Strongly agree	Strongly agree	Strongly agree	Strongly agree	Strongly agree	Strongly agree	Unsure/neutral	Strongly agree	Agree	Agree	Agree	Agree	Disagree	Agree	Agree	Agree	Strongly agree	Strongly agree	Strongly agree	Strongly agree	Strongly agree	Strongly agree	Strongly disagree	Strongly agree	Strongly agree	Strongly disagree	Strongly agree	Strongly agree	Strongly disagree	Strongly agree
Northland Region	Disagree	Unsure/neutral	Disagree	Agree	Unsure/neutral	Disagree	Agree	Disagree	Unsure/neutral	Unsure/neutral	Unsure/neutral	Unsure/neutral	Agree	Disagree	Agree	Agree	Agree	Agree	Agree	Agree	Agree	Unsure/neutral	Agree	Agree	Agree	Agree	Agree	Agree	Unsure/neutral	Agree	Agree	Agree	Agree	Agree	Agree	Agree	Agree	Agree	Agree	Agree	Agree	Disagree	Agree	Agree	Unsure/neutral	Agree	Agree	Disagree	Agree
Bay of Plenty Region	Strongly disagree	Unsure/neutral	Strongly disagree	Disagree	Strongly disagree	Strongly disagree	Strongly agree	Strongly disagree	Agree	Unsure/neutral	Unsure/neutral	Unsure/neutral	Unsure/neutral	Strongly disagree	Agree	Agree	Unsure/neutral	Disagree	Unsure/neutral	Strongly agree	Strongly agree	Strongly agree	Strongly agree	Strongly agree	Strongly agree	Strongly agree	Strongly agree	Strongly agree	Unsure/neutral	Strongly agree	Strongly agree	Unsure/neutral	Unsure/neutral	Strongly agree	Unsure/neutral	Strongly disagree	Unsure/neutral	Unsure/neutral	Unsure/neutral	Disagree	Unsure/neutral	Unsure/neutral	Disagree	Disagree	Unsure/neutral	Agree	Agree	Disagree	Agree
Auckland Region	Strongly disagree	Unsure/neutral	Strongly disagree	Disagree	Disagree	Disagree	Agree	Strongly disagree	Agree	Disagree	Agree	Agree	Agree	Disagree	Strongly agree	Agree	Disagree	Disagree	Agree	Strongly agree	Strongly agree	Agree	Strongly agree	Agree	Strongly agree	Agree	Agree	Agree	Disagree	Disagree	Agree	Agree	Disagree	Agree	Agree	Agree	Unsure/neutral	Unsure/neutral	Disagree	Disagree	Agree	Unsure/neutral	Disagree	Agree	Unsure/neutral	Agree	Agree	Strongly disagree	Agree
Auckland Region	Disagree	Unsure/neutral	Strongly disagree	Disagree	Disagree	Strongly agree	Agree	Disagree	Agree	Disagree	Agree	Agree	Agree	Disagree	Agree	Unsure/neutral	Unsure/neutral	Agree	Agree	Agree	Agree	Agree	Agree	Agree	Agree	Agree	Agree	Agree	Unsure/neutral	Unsure/neutral	Agree	Unsure/neutral	Unsure/neutral	Agree	Unsure/neutral	Unsure/neutral	Agree	Unsure/neutral	Unsure/neutral	Unsure/neutral	Agree	Unsure/neutral	Unsure/neutral	Unsure/neutral	Unsure/neutral	Unsure/neutral	Unsure/neutral	Disagree	Unsure/neutral
Auckland Region	Strongly disagree	Strongly disagree	Strongly disagree	Strongly disagree	Strongly disagree	Strongly disagree	Agree	Strongly disagree	Agree	Strongly disagree	Agree	Agree	Strongly agree	Disagree	Strongly agree	Strongly agree	Strongly disagree	Strongly disagree	Strongly disagree	Strongly agree	Strongly agree	Strongly agree	Strongly agree	Strongly agree	Strongly agree	Strongly agree	Strongly agree	Agree	Unsure/neutral	Strongly agree	Strongly agree	Agree	Strongly agree	Strongly agree	Agree	Strongly agree	Agree	Agree	Agree	Strongly agree	Strongly agree	Strongly disagree	Strongly agree	Strongly agree	Strongly disagree	Strongly agree	Strongly agree	Strongly disagree	Strongly agree
Tasman/ Nelson Region	Strongly disagree	Disagree	Strongly disagree	Strongly disagree	Disagree	Strongly disagree	Strongly agree	Strongly disagree	Agree	Strongly disagree	Strongly agree	Unsure/neutral	Agree	Strongly disagree	Strongly agree	Agree	Disagree	Strongly disagree	Disagree	Strongly agree	Agree	Agree	Strongly agree	Strongly agree	Strongly agree	Strongly agree	Strongly agree	Agree	Strongly agree	Agree	Strongly agree	Strongly agree	Agree	Strongly agree	Agree	Unsure/neutral	Agree	Agree	Agree	Agree	Agree	Unsure/neutral	Agree	Agree	Strongly disagree	Strongly agree	Strongly agree	Strongly disagree	Strongly agree
Auckland Region	Strongly disagree	Strongly disagree	Strongly disagree	Unsure/neutral	Strongly disagree	Strongly disagree	Disagree	Strongly disagree	Strongly agree	Disagree	Strongly agree	Disagree	Agree	Strongly disagree	Unsure/neutral	Unsure/neutral	Unsure/neutral	Unsure/neutral	Agree	Unsure/neutral	Unsure/neutral	Unsure/neutral	Unsure/neutral	Unsure/neutral	Unsure/neutral	Unsure/neutral	Unsure/neutral	Unsure/neutral	Unsure/neutral	Unsure/neutral	Unsure/neutral	Unsure/neutral	Agree	Unsure/neutral	Unsure/neutral	Agree	Unsure/neutral	Agree	Unsure/neutral	Agree	Agree	Strongly disagree	Unsure/neutral	Agree	Strongly disagree	Strongly agree	Strongly agree	Strongly disagree	Strongly agree
Auckland Region	Disagree	Unsure/neutral	Unsure/neutral	Agree	Unsure/neutral	Disagree	Agree	Unsure/neutral	Agree	Disagree	Disagree	Unsure/neutral	Agree	Disagree	Unsure/neutral	Unsure/neutral	Agree	Agree	Strongly agree	Unsure/neutral	Unsure/neutral	Agree	Agree	Agree	Agree	Unsure/neutral	Unsure/neutral	Unsure/neutral	Unsure/neutral	Unsure/neutral	Unsure/neutral	Unsure/neutral	Unsure/neutral	Unsure/neutral	Unsure/neutral	Disagree	Disagree	Disagree	Disagree	Disagree	Disagree	Unsure/neutral	Disagree	Disagree	Unsure/neutral	Disagree	Disagree	Disagree	Disagree
Auckland Region	Strongly disagree	Disagree	Strongly disagree	Disagree	Strongly disagree	Disagree	Strongly agree	Strongly disagree	Agree	Disagree	Agree	Agree	Strongly agree	Strongly disagree	Agree	Agree	Agree	Unsure/neutral	Agree	Strongly agree	Strongly agree	Unsure/neutral	Unsure/neutral	Strongly agree	Unsure/neutral	Unsure/neutral	Agree	Unsure/neutral	Strongly agree	Agree	Agree	Agree	Agree	Agree	Agree	Agree	Agree	Agree	Agree	Agree	Agree	Disagree	Agree	Agree	Disagree	Agree	Agree	Disagree	Agree
Auckland Region	Strongly disagree	Disagree	Strongly disagree	Unsure/neutral	Disagree	Disagree	Strongly agree	Disagree	Disagree	Disagree	Disagree	Agree	Agree	Disagree	Agree	Agree	Unsure/neutral	Disagree	Agree	Agree	Agree	Agree	Agree	Agree	Agree	Unsure/neutral	Agree	Unsure/neutral	Agree	Agree	Agree	Unsure/neutral	Agree	Agree	Unsure/neutral	Unsure/neutral	Agree	Unsure/neutral	Unsure/neutral	Agree	Agree	Unsure/neutral	Agree	Agree	Disagree	Strongly agree	Strongly agree	Strongly disagree	Strongly agree
Auckland Region	Strongly disagree	Disagree	Strongly disagree	Strongly disagree	Strongly disagree	Strongly disagree	Strongly agree	Strongly disagree	Unsure/neutral	Disagree	Strongly agree	Unsure/neutral	Unsure/neutral	Strongly disagree	Strongly agree	Strongly agree	Unsure/neutral	Disagree	Unsure/neutral	Strongly agree	Strongly agree	Strongly agree	Strongly agree	Strongly agree	Agree	Agree	Strongly agree	Strongly agree	Disagree	Agree	Strongly agree	Strongly agree	Unsure/neutral	Strongly agree	Strongly agree	Strongly agree	Agree	Strongly agree	Strongly agree	Unsure/neutral	Strongly agree	Disagree	Unsure/neutral	Strongly agree	Unsure/neutral	Strongly agree	Strongly agree	Strongly disagree	Strongly agree
Southland Region	Disagree	Unsure/neutral	Strongly disagree	Disagree	Disagree	Disagree	Agree	Disagree	Strongly agree	Disagree	Strongly agree	Agree	Agree	Disagree	Agree	Disagree	Agree	Agree	Agree	Disagree	Agree	Agree	Agree	Agree	Disagree	Unsure/neutral	Disagree	Disagree	Disagree	Agree	Unsure/neutral	Agree	Disagree	Disagree	Agree	Disagree	Agree	Disagree	Agree	Disagree	Disagree	Agree	Agree	Disagree	Agree	Disagree	Unsure/neutral	Unsure/neutral	Disagree
Waikato Region	Strongly disagree	Disagree	Strongly disagree	Strongly disagree	Strongly disagree	Strongly disagree	Agree	Strongly disagree	Agree	Strongly disagree	Agree	Disagree	Strongly agree	Strongly disagree	Strongly agree	Strongly agree	Disagree	Disagree	Agree	Agree	Strongly agree	Agree	Agree	Strongly agree	Strongly disagree	Strongly agree	Strongly agree	Strongly agree	Agree	Strongly agree	Strongly agree	Agree	Strongly agree	Strongly agree	Unsure/neutral	Agree	Agree	Strongly agree	Strongly agree	Strongly agree	Strongly agree	Disagree	Strongly agree	Strongly agree	Agree	Strongly agree	Strongly agree	Disagree	Agree
Bay of Plenty Region	Disagree	Agree	Disagree	Strongly agree	Disagree	Strongly agree	Agree	Strongly agree	Disagree	Agree	Strongly disagree	Agree	Agree	Strongly disagree	Strongly disagree	Disagree	Agree	Agree	Agree	Disagree	Disagree	Disagree	Agree	Disagree	Disagree	Disagree	Strongly disagree	Disagree	Strongly disagree	Disagree	Disagree	Agree	Disagree	Disagree	Agree	Strongly disagree	Strongly disagree	Agree	Strongly disagree	Disagree	Strongly disagree	Disagree	Disagree	Disagree	Disagree	Agree	Agree	Disagree	Agree
Auckland Region	Disagree	Strongly disagree	Strongly disagree	Unsure/neutral	Disagree	Strongly disagree	Agree	Unsure/neutral	Agree	Strongly agree	Agree	Strongly agree	Strongly agree	Strongly disagree	Strongly agree	Strongly agree	Unsure/neutral	Strongly disagree	Strongly agree	Strongly agree	Strongly agree	Strongly agree	Strongly agree	Strongly agree	Strongly agree	Strongly agree	Strongly agree	Strongly agree	Strongly agree	Strongly agree	Strongly agree	Agree	Strongly agree	Strongly agree	Agree	Strongly agree	Agree	Strongly agree	Strongly agree	Strongly agree	Strongly agree	Strongly agree	Strongly agree	Strongly agree	Strongly agree	Strongly agree	Strongly agree	Strongly disagree	Strongly agree
Auckland Region	Strongly disagree	Strongly disagree	Strongly disagree	Disagree	Strongly disagree	Strongly disagree	Strongly agree	Strongly disagree	Disagree	Strongly disagree	Agree	Agree	Unsure/neutral	Strongly disagree	Strongly agree	Agree	Unsure/neutral	Disagree	Agree	Strongly agree	Strongly agree	Strongly agree	Agree	Strongly agree	Agree	Disagree	Agree	Unsure/neutral	Unsure/neutral	Agree	Agree	Disagree	Agree	Agree	Agree	Agree	Unsure/neutral	Agree	Unsure/neutral	Agree	Agree	Strongly disagree	Agree	Agree	Strongly disagree	Strongly agree	Strongly agree	Strongly disagree	Strongly agree
Auckland Region	Strongly disagree	Strongly disagree	Disagree	Agree	Strongly disagree	Agree	Strongly agree	Strongly disagree	Strongly agree	Unsure/neutral	Agree	Unsure/neutral	Disagree	Strongly disagree	Unsure/neutral	Strongly agree	Strongly disagree	Agree	Strongly agree	Agree	Agree	Agree	Agree	Agree	Unsure/neutral	Unsure/neutral	Unsure/neutral	Unsure/neutral	Agree	Disagree	Unsure/neutral	Unsure/neutral	Disagree	Unsure/neutral	Agree	Strongly disagree	Disagree	Strongly disagree	Disagree	Strongly disagree	Strongly disagree	Disagree	Strongly disagree	Disagree	Disagree	Disagree	Disagree	Agree	Disagree
Auckland Region	Unsure/neutral	Unsure/neutral	Unsure/neutral	Unsure/neutral	Unsure/neutral	Unsure/neutral	Unsure/neutral	Unsure/neutral	Unsure/neutral	Unsure/neutral	Unsure/neutral	Unsure/neutral	Unsure/neutral	Unsure/neutral	Unsure/neutral	Unsure/neutral	Unsure/neutral	Unsure/neutral	Unsure/neutral	Unsure/neutral	Unsure/neutral	Unsure/neutral	Unsure/neutral	Unsure/neutral	Unsure/neutral	Unsure/neutral	Unsure/neutral	Unsure/neutral	Unsure/neutral	Unsure/neutral	Unsure/neutral	Unsure/neutral	Unsure/neutral	Unsure/neutral	Unsure/neutral	Unsure/neutral	Unsure/neutral	Unsure/neutral	Unsure/neutral	Unsure/neutral	Unsure/neutral	Unsure/neutral	Unsure/neutral	Unsure/neutral	Unsure/neutral	Unsure/neutral	Unsure/neutral	Unsure/neutral	Unsure/neutral
Auckland Region	Strongly disagree	Disagree	Strongly disagree	Agree	Unsure/neutral	Strongly disagree	Agree	Strongly disagree	Unsure/neutral	Disagree	Agree	Agree	Strongly agree	Strongly disagree	Agree	Unsure/neutral	Agree	Agree	Agree	Agree	Agree	Agree	Agree	Agree	Agree	Disagree	Agree	Disagree	Strongly agree	Agree	Agree	Agree	Agree	Agree	Strongly agree	Unsure/neutral	Agree	Disagree	Unsure/neutral	Agree	Agree	Disagree	Agree	Agree	Agree	Agree	Agree	Disagree	Agree
Taranaki Region	Strongly disagree	Strongly disagree	Strongly disagree	Strongly agree	Strongly disagree	Strongly disagree	Strongly agree	Strongly disagree	Unsure/neutral	Disagree	Disagree	Agree	Agree	Strongly disagree	Strongly agree	Strongly agree	Unsure/neutral	Disagree	Agree	Strongly agree	Strongly agree	Strongly agree	Agree	Strongly agree	Agree	Disagree	Strongly agree	Agree	Agree	Agree	Agree	Strongly agree	Agree	Agree	Strongly agree	Unsure/neutral	Unsure/neutral	Agree	Disagree	Agree	Agree	Disagree	Agree	Agree	Disagree	Agree	Agree	Strongly disagree	Agree
Auckland Region	Strongly disagree	Disagree	Strongly disagree	Strongly disagree	Disagree	Strongly disagree	Strongly agree	Strongly disagree	Agree	Disagree	Strongly agree	Agree	Agree	Strongly disagree	Agree	Disagree	Disagree	Disagree	Agree	Strongly agree	Strongly agree	Agree	Strongly agree	Strongly agree	Strongly agree	Agree	Strongly agree	Agree	Strongly agree	Agree	Strongly agree	Strongly agree	Strongly agree	Agree	Agree	Agree	Strongly agree	Strongly agree	Agree	Strongly agree	Strongly agree	Disagree	Strongly agree	Strongly agree	Disagree	Strongly agree	Strongly agree	Disagree	Strongly agree
Manawatu-Whanganui Region	Disagree	Unsure/neutral	Strongly disagree	Disagree	Disagree	Disagree	Strongly agree	Strongly disagree	Agree	Disagree	Agree	Agree	Agree	Unsure/neutral	Strongly agree	Agree	Unsure/neutral	Agree	Agree	Strongly agree	Strongly agree	Agree	Agree	Strongly agree	Agree	Strongly agree	Strongly agree	Agree	Agree	Agree	Agree	Agree	Unsure/neutral	Agree	Agree	Agree	Unsure/neutral	Agree	Unsure/neutral	Strongly agree	Agree	Disagree	Agree	Agree	Disagree	Agree	Strongly agree	Disagree	Strongly agree
Wellington Region	Strongly disagree	Strongly disagree	Strongly disagree	Disagree	Disagree	Disagree	Agree	Disagree	Unsure/neutral	Disagree	Agree	Agree	Agree	Strongly disagree	Disagree	Disagree	Agree	Agree	Strongly agree	Disagree	Agree	Agree	Agree	Agree	Agree	Disagree	Disagree	Strongly disagree	Disagree	Agree	Disagree	Disagree	Agree	Disagree	Disagree	Disagree	Disagree	Disagree	Disagree	Agree	Agree	Disagree	Agree	Unsure/neutral	Disagree	Strongly agree	Strongly agree	Disagree	Strongly agree
Waikato Region	Disagree	Disagree	Strongly disagree	Unsure/neutral	Disagree	Disagree	Agree	Strongly disagree	Agree	Disagree	Disagree	Agree	Strongly agree	Disagree	Strongly agree	Unsure/neutral	Unsure/neutral	Disagree	Agree	Strongly agree	Strongly agree	Agree	Strongly agree	Strongly agree	Strongly agree	Strongly agree	Agree	Agree	Strongly agree	Agree	Strongly agree	Disagree	Agree	Strongly agree	Disagree	Unsure/neutral	Unsure/neutral	Agree	Disagree	Agree	Strongly agree	Disagree	Agree	Agree	Disagree	Agree	Agree	Disagree	Strongly agree
Auckland Region	Unsure/neutral	Agree	Agree	Agree	Agree	Agree	Strongly agree	Unsure/neutral	Strongly agree	Strongly agree	Unsure/neutral	Agree	Unsure/neutral	Agree	Strongly agree	Strongly agree	Strongly agree	Strongly agree	Strongly agree	Strongly agree	Strongly agree	Strongly agree	Strongly agree	Strongly agree	Strongly agree	Disagree	Unsure/neutral	Agree	Disagree	Strongly agree	Disagree	Unsure/neutral	Unsure/neutral	Strongly agree	Agree	Agree	Agree	Strongly agree	Unsure/neutral	Strongly agree	Agree	Unsure/neutral	Disagree	Unsure/neutral	Unsure/neutral	Disagree	Disagree	Unsure/neutral	Unsure/neutral
Auckland Region	Strongly disagree	Disagree	Strongly disagree	Strongly disagree	Disagree	Strongly disagree	Agree	Strongly disagree	Agree	Disagree	Strongly agree	Unsure/neutral	Unsure/neutral	Disagree	Strongly agree	Strongly agree	Unsure/neutral	Disagree	Disagree	Strongly agree	Strongly agree	Unsure/neutral	Agree	Strongly agree	Unsure/neutral	Strongly agree	Strongly agree	Agree	Agree	Agree	Strongly agree	Strongly agree	Strongly agree	Strongly agree	Agree	Unsure/neutral	Unsure/neutral	Strongly agree	Unsure/neutral	Strongly agree	Strongly agree	Disagree	Strongly agree	Strongly agree	Disagree	Strongly agree	Strongly agree	Disagree	Strongly agree
Bay of Plenty Region	Strongly disagree	Disagree	Strongly disagree	Strongly disagree	Strongly disagree	Strongly disagree	Strongly agree	Strongly disagree	Disagree	Strongly disagree	Agree	Agree	Strongly agree	Strongly disagree	Strongly agree	Strongly agree	Unsure/neutral	Unsure/neutral	Agree	Strongly agree	Strongly agree	Strongly agree	Strongly agree	Strongly agree	Strongly agree	Agree	Agree	Agree	Agree	Strongly agree	Strongly agree	Agree	Agree	Strongly agree	Agree	Agree	Unsure/neutral	Agree	Unsure/neutral	Agree	Agree	Disagree	Agree	Agree	Disagree	Strongly agree	Strongly agree	Strongly disagree	Strongly agree
Auckland Region	Strongly disagree	Disagree	Strongly disagree	Strongly disagree	Strongly disagree	Strongly disagree	Unsure/neutral	Strongly disagree	Strongly agree	Strongly disagree	Strongly agree	Agree	Strongly agree	Strongly disagree	Strongly agree	Agree	Strongly disagree	Disagree	Disagree	Strongly agree	Agree	Agree	Agree	Strongly agree	Agree	Agree	Strongly agree	Agree	Agree	Agree	Agree	Strongly agree	Agree	Agree	Agree	Unsure/neutral	Agree	Agree	Unsure/neutral	Strongly agree	Agree	Disagree	Unsure/neutral	Agree	Disagree	Agree	Strongly agree	Strongly disagree	Strongly agree
Canterbury Region	Strongly disagree	Unsure/neutral	Strongly disagree	Agree	Strongly disagree	Strongly disagree	Strongly agree	Strongly disagree	Disagree	Disagree	Agree	Unsure/neutral	Agree	Strongly disagree	Agree	Strongly agree	Disagree	Disagree	Disagree	Strongly agree	Agree	Disagree	Agree	Agree	Disagree	Unsure/neutral	Agree	Disagree	Agree	Disagree	Unsure/neutral	Agree	Agree	Unsure/neutral	Agree	Strongly disagree	Unsure/neutral	Unsure/neutral	Unsure/neutral	Disagree	Agree	Unsure/neutral	Unsure/neutral	Agree	Unsure/neutral	Unsure/neutral	Unsure/neutral	Disagree	Agree
Auckland Region	Strongly disagree	Strongly disagree	Strongly disagree	Disagree	Disagree	Strongly disagree	Strongly agree	Strongly disagree	Agree	Strongly disagree	Strongly agree	Agree	Agree	Strongly disagree	Strongly agree	Agree	Disagree	Disagree	Agree	Strongly agree	Strongly agree	Strongly agree	Strongly agree	Strongly agree	Strongly agree	Strongly agree	Strongly agree	Strongly agree	Strongly agree	Strongly agree	Strongly agree	Disagree	Strongly agree	Strongly agree	Disagree	Agree	Agree	Strongly agree	Strongly agree	Strongly agree	Strongly agree	Disagree	Strongly agree	Strongly agree	Strongly agree	Strongly agree	Strongly agree	Disagree	Strongly agree
Canterbury Region	Strongly disagree	Strongly disagree	Strongly disagree	Unsure/neutral	Disagree	Strongly disagree	Agree	Strongly disagree	Unsure/neutral	Unsure/neutral	Unsure/neutral	Agree	Strongly agree	Disagree	Unsure/neutral	Unsure/neutral	Disagree	Agree	Agree	Unsure/neutral	Unsure/neutral	Unsure/neutral	Unsure/neutral	Unsure/neutral	Unsure/neutral	Agree	Agree	Agree	Agree	Agree	Agree	Agree	Agree	Agree	Agree	Unsure/neutral	Unsure/neutral	Unsure/neutral	Unsure/neutral	Unsure/neutral	Agree	Unsure/neutral	Unsure/neutral	Unsure/neutral	Unsure/neutral	Unsure/neutral	Unsure/neutral	Unsure/neutral	Unsure/neutral
Auckland Region	Strongly disagree	Disagree	Strongly disagree	Agree	Disagree	Strongly disagree	Agree	Strongly disagree	Agree	Disagree	Agree	Agree	Agree	Disagree	Disagree	Unsure/neutral	Unsure/neutral	Agree	Strongly agree	Unsure/neutral	Unsure/neutral	Unsure/neutral	Disagree	Agree	Disagree	Strongly disagree	Unsure/neutral	Disagree	Strongly agree	Disagree	Unsure/neutral	Strongly agree	Disagree	Unsure/neutral	Unsure/neutral	Strongly disagree	Agree	Agree	Disagree	Agree	Agree	Disagree	Disagree	Agree	Disagree	Agree	Agree	Disagree	Agree
Auckland Region	Disagree	Disagree	Disagree	Agree	Disagree	Disagree	Agree	Disagree	Unsure/neutral	Agree	Unsure/neutral	Agree	Unsure/neutral	Disagree	Disagree	Unsure/neutral	Agree	Agree	Agree	Agree	Disagree	Agree	Disagree	Agree	Unsure/neutral	Disagree	Disagree	Disagree	Agree	Disagree	Disagree	Disagree	Disagree	Disagree	Disagree	Disagree	Disagree	Disagree	Disagree	Disagree	Disagree	Disagree	Disagree	Disagree	Disagree	Disagree	Disagree	Unsure/neutral	Disagree
Auckland Region	Strongly disagree	Strongly agree	Strongly disagree	Strongly agree	Strongly agree	Strongly disagree	Strongly disagree	Strongly disagree	Strongly disagree	Strongly agree	Strongly agree	Strongly agree	Strongly agree	Strongly disagree	Strongly agree	Strongly agree	Strongly agree	Strongly agree	Strongly agree	Strongly agree	Disagree	Disagree	Disagree	Disagree	Disagree	Disagree	Disagree	Disagree	Disagree	Disagree	Disagree	Disagree	Disagree	Disagree	Disagree	Disagree	Disagree	Disagree	Disagree	Disagree	Disagree	Disagree	Disagree	Disagree	Disagree	Disagree	Disagree	Disagree	Disagree
Auckland Region	Disagree	Disagree	Disagree	Unsure/neutral	Disagree	Disagree	Agree	Disagree	Disagree	Disagree	Unsure/neutral	Unsure/neutral	Agree	Disagree	Unsure/neutral	Agree	Unsure/neutral	Unsure/neutral	Agree	Agree	Unsure/neutral	Unsure/neutral	Agree	Agree	Agree	Unsure/neutral	Unsure/neutral	Unsure/neutral	Agree	Agree	Agree	Disagree	Agree	Unsure/neutral	Disagree	Unsure/neutral	Unsure/neutral	Agree	Unsure/neutral	Agree	Unsure/neutral	Disagree	Agree	Unsure/neutral	Disagree	Agree	Agree	Disagree	Agree
Auckland Region	Disagree	Unsure/neutral	Strongly disagree	Unsure/neutral	Unsure/neutral	Strongly disagree	Agree	Disagree	Unsure/neutral	Unsure/neutral	Unsure/neutral	Unsure/neutral	Agree	Disagree	Agree	Agree	Unsure/neutral	Unsure/neutral	Unsure/neutral	Unsure/neutral	Unsure/neutral	Unsure/neutral	Unsure/neutral	Unsure/neutral	Unsure/neutral	Disagree	Unsure/neutral	Disagree	Strongly agree	Unsure/neutral	Unsure/neutral	Agree	Agree	Disagree	Agree	Unsure/neutral	Unsure/neutral	Unsure/neutral	Disagree	Unsure/neutral	Unsure/neutral	Disagree	Unsure/neutral	Unsure/neutral	Disagree	Unsure/neutral	Unsure/neutral	Disagree	Agree
Bay of Plenty Region	Disagree	Agree	Strongly disagree	Unsure/neutral	Unsure/neutral	Agree	Strongly agree	Disagree	Agree	Disagree	Disagree	Strongly agree	Strongly agree	Unsure/neutral	Agree	Unsure/neutral	Unsure/neutral	Unsure/neutral	Agree	Agree	Agree	Unsure/neutral	Unsure/neutral	Agree	Unsure/neutral	Agree	Agree	Agree	Unsure/neutral	Unsure/neutral	Agree	Unsure/neutral	Unsure/neutral	Agree	Unsure/neutral	Agree	Unsure/neutral	Agree	Unsure/neutral	Unsure/neutral	Agree	Agree	Unsure/neutral	Agree	Agree	Agree	Agree	Disagree	Agree
Waikato Region	Disagree	Disagree	Disagree	Disagree	Disagree	Disagree	Agree	Disagree	Agree	Disagree	Agree	Agree	Agree	Disagree	Agree	Agree	Disagree	Unsure/neutral	Agree	Agree	Agree	Disagree	Agree	Agree	Agree	Agree	Agree	Agree	Agree	Agree	Agree	Agree	Agree	Agree	Agree	Agree	Agree	Agree	Agree	Agree	Agree	Agree	Agree	Agree	Agree	Agree	Agree	Disagree	Agree
Canterbury Region	Strongly disagree	Strongly disagree	Strongly disagree	Strongly disagree	Strongly disagree	Strongly disagree	Strongly agree	Strongly disagree	Agree	Unsure/neutral	Strongly agree	Strongly agree	Strongly agree	Strongly disagree	Strongly agree	Strongly agree	Disagree	Disagree	Agree	Strongly agree	Strongly agree	Strongly agree	Strongly agree	Strongly agree	Strongly agree	Strongly agree	Strongly agree	Strongly agree	Agree	Strongly agree	Strongly agree	Strongly agree	Strongly agree	Strongly agree	Strongly agree	Strongly agree	Agree	Strongly agree	Strongly agree	Strongly agree	Strongly agree	Disagree	Strongly agree	Strongly agree	Disagree	Strongly agree	Strongly agree	Strongly disagree	Strongly agree
Canterbury Region	Strongly disagree	Disagree	Strongly disagree	Disagree	Disagree	Disagree	Strongly agree	Strongly disagree	Disagree	Disagree	Strongly agree	Agree	Agree	Strongly disagree	Strongly agree	Agree	Disagree	Disagree	Agree	Agree	Strongly agree	Strongly agree	Strongly agree	Strongly agree	Strongly agree	Unsure/neutral	Agree	Unsure/neutral	Agree	Agree	Agree	Agree	Strongly agree	Agree	Agree	Agree	Agree	Agree	Agree	Agree	Strongly agree	Strongly disagree	Strongly agree	Agree	Disagree	Strongly agree	Strongly agree	Strongly disagree	Strongly agree
Canterbury Region	Strongly disagree	Disagree	Strongly disagree	Disagree	Disagree	Strongly disagree	Agree	Strongly agree	Unsure/neutral	Strongly disagree	Agree	Strongly agree	Agree	Disagree	Strongly agree	Agree	Unsure/neutral	Disagree	Agree	Strongly agree	Agree	Agree	Agree	Agree	Agree	Agree	Agree	Agree	Agree	Strongly agree	Strongly agree	Agree	Agree	Agree	Strongly agree	Agree	Agree	Strongly agree	Agree	Agree	Agree	Agree	Agree	Strongly agree	Agree	Strongly agree	Strongly agree	Disagree	Strongly agree
Bay of Plenty Region	Strongly disagree	Disagree	Strongly disagree	Strongly disagree	Unsure/neutral	Strongly disagree	Strongly agree	Strongly disagree	Strongly disagree	Disagree	Strongly disagree	Agree	Strongly agree	Disagree	Agree	Agree	Unsure/neutral	Unsure/neutral	Strongly agree	Strongly agree	Strongly agree	Strongly agree	Strongly agree	Strongly agree	Strongly agree	Strongly agree	Strongly agree	Agree	Strongly agree	Agree	Strongly agree	Agree	Strongly agree	Strongly agree	Agree	Agree	Unsure/neutral	Unsure/neutral	Unsure/neutral	Unsure/neutral	Agree	Disagree	Agree	Agree	Disagree	Strongly agree	Strongly agree	Disagree	Strongly agree
Bay of Plenty Region	Disagree	Unsure/neutral	Disagree	Unsure/neutral	Disagree	Disagree	Agree	Unsure/neutral	Unsure/neutral	Disagree	Unsure/neutral	Unsure/neutral	Agree	Disagree	Unsure/neutral	Unsure/neutral	Unsure/neutral	Unsure/neutral	Agree	Agree	Agree	Agree	Agree	Agree	Agree	Unsure/neutral	Agree	Unsure/neutral	Unsure/neutral	Unsure/neutral	Agree	Unsure/neutral	Agree	Unsure/neutral	Unsure/neutral	Unsure/neutral	Unsure/neutral	Unsure/neutral	Unsure/neutral	Unsure/neutral	Agree	Disagree	Agree	Unsure/neutral	Disagree	Agree	Agree	Disagree	Agree
Auckland Region	Unsure/neutral	Unsure/neutral	Disagree	Unsure/neutral	Disagree	Strongly agree	Strongly agree	Unsure/neutral	Agree	Agree	Unsure/neutral	Agree	Agree	Disagree	Agree	Agree	Disagree	Unsure/neutral	Unsure/neutral	Agree	Agree	Agree	Agree	Agree	Agree	Agree	Agree	Agree	Unsure/neutral	Agree	Agree	Unsure/neutral	Agree	Agree	Unsure/neutral	Agree	Unsure/neutral	Agree	Unsure/neutral	Agree	Agree	Disagree	Unsure/neutral	Agree	Disagree	Agree	Agree	Disagree	Agree
Auckland Region	Strongly disagree	Disagree	Strongly disagree	Agree	Disagree	Agree	Strongly agree	Agree	Agree	Disagree	Disagree	Strongly agree	Strongly agree	Strongly disagree	Agree	Agree	Unsure/neutral	Disagree	Agree	Agree	Agree	Agree	Agree	Agree	Agree	Unsure/neutral	Unsure/neutral	Disagree	Agree	Disagree	Unsure/neutral	Strongly agree	Disagree	Unsure/neutral	Strongly agree	Disagree	Unsure/neutral	Strongly disagree	Unsure/neutral	Disagree	Disagree	Disagree	Disagree	Disagree	Agree	Unsure/neutral	Agree	Strongly disagree	Agree
Taranaki Region	Disagree	Unsure/neutral	Disagree	Unsure/neutral	Disagree	Agree	Agree	Disagree	Agree	Unsure/neutral	Unsure/neutral	Unsure/neutral	Unsure/neutral	Disagree	Disagree	Unsure/neutral	Agree	Agree	Agree	Disagree	Disagree	Disagree	Disagree	Agree	Disagree	Disagree	Unsure/neutral	Disagree	Agree	Agree	Disagree	Agree	Agree	Disagree	Agree	Disagree	Disagree	Disagree	Disagree	Disagree	Disagree	Agree	Agree	Disagree	Agree	Disagree	Disagree	Agree	Disagree
Canterbury Region	Strongly disagree	Disagree	Strongly disagree	Strongly disagree	Strongly disagree	Disagree	Agree	Strongly disagree	Strongly agree	Disagree	Unsure/neutral	Agree	Agree	Strongly disagree	Agree	Agree	Disagree	Disagree	Agree	Agree	Agree	Agree	Agree	Agree	Agree	Unsure/neutral	Unsure/neutral	Agree	Unsure/neutral	Agree	Agree	Agree	Agree	Unsure/neutral	Agree	Unsure/neutral	Unsure/neutral	Agree	Disagree	Agree	Agree	Disagree	Agree	Agree	Disagree	Agree	Agree	Disagree	Agree
Canterbury Region	Strongly disagree	Strongly disagree	Strongly disagree	Strongly disagree	Strongly disagree	Strongly disagree	Strongly agree	Strongly disagree	Unsure/neutral	Strongly disagree	Strongly agree	Unsure/neutral	Unsure/neutral	Strongly disagree	Strongly agree	Strongly agree	Strongly disagree	Strongly disagree	Strongly disagree	Strongly agree	Strongly agree	Strongly agree	Strongly agree	Strongly agree	Strongly agree	Strongly agree	Strongly agree	Strongly agree	Strongly agree	Strongly agree	Strongly agree	Unsure/neutral	Unsure/neutral	Strongly agree	Unsure/neutral	Strongly agree	Strongly agree	Strongly agree	Strongly agree	Strongly agree	Strongly agree	Unsure/neutral	Unsure/neutral	Strongly agree	Unsure/neutral	Strongly agree	Strongly agree	Strongly disagree	Strongly agree
Canterbury Region	Strongly disagree	Unsure/neutral	Agree	Strongly agree	Disagree	Unsure/neutral	Unsure/neutral	Disagree	Disagree	Unsure/neutral	Disagree	Agree	Agree	Unsure/neutral	Unsure/neutral	Unsure/neutral	Unsure/neutral	Agree	Agree	Unsure/neutral	Agree	Unsure/neutral	Agree	Agree	Agree	Unsure/neutral	Disagree	Unsure/neutral	Unsure/neutral	Agree	Unsure/neutral	Unsure/neutral	Unsure/neutral	Agree	Unsure/neutral	Agree	Agree	Agree	Agree	Agree	Agree	Agree	Agree	Unsure/neutral	Agree	Disagree	Agree	Disagree	Agree
Auckland Region	Strongly disagree	Strongly disagree	Strongly disagree	Disagree	Strongly disagree	Strongly disagree	Agree	Strongly disagree	Agree	Strongly disagree	Strongly agree	Agree	Strongly agree	Strongly disagree	Strongly agree	Strongly agree	Unsure/neutral	Disagree	Agree	Strongly agree	Strongly agree	Strongly agree	Strongly agree	Strongly agree	Strongly agree	Strongly agree	Strongly agree	Strongly agree	Unsure/neutral	Agree	Strongly agree	Disagree	Agree	Strongly agree	Agree	Strongly agree	Agree	Strongly agree	Strongly agree	Strongly agree	Strongly agree	Strongly disagree	Strongly agree	Strongly agree	Strongly disagree	Strongly agree	Strongly agree	Strongly disagree	Strongly agree
Canterbury Region	Strongly disagree	Strongly disagree	Disagree	Disagree	Strongly disagree	Unsure/neutral	Agree	Strongly disagree	Agree	Disagree	Unsure/neutral	Agree	Agree	Strongly disagree	Agree	Agree	Unsure/neutral	Unsure/neutral	Unsure/neutral	Strongly agree	Agree	Agree	Agree	Agree	Agree	Agree	Agree	Agree	Agree	Unsure/neutral	Agree	Agree	Unsure/neutral	Agree	Agree	Disagree	Agree	Unsure/neutral	Agree	Unsure/neutral	Unsure/neutral	Agree	Unsure/neutral	Agree	Agree	Unsure/neutral	Unsure/neutral	Unsure/neutral	Unsure/neutral
Auckland Region	Disagree	Disagree	Strongly disagree	Disagree	Disagree	Disagree	Agree	Disagree	Agree	Disagree	Agree	Agree	Agree	Disagree	Agree	Agree	Unsure/neutral	Unsure/neutral	Agree	Agree	Strongly agree	Agree	Agree	Agree	Agree	Unsure/neutral	Unsure/neutral	Unsure/neutral	Unsure/neutral	Agree	Agree	Strongly agree	Strongly agree	Agree	Strongly agree	Unsure/neutral	Unsure/neutral	Unsure/neutral	Unsure/neutral	Agree	Agree	Unsure/neutral	Agree	Agree	Agree	Agree	Agree	Disagree	Agree
Waikato Region	Strongly disagree	Disagree	Strongly disagree	Agree	Strongly disagree	Strongly disagree	Strongly agree	Strongly agree	Disagree	Strongly disagree	Agree	Strongly agree	Strongly agree	Strongly disagree	Strongly agree	Strongly agree	Unsure/neutral	Disagree	Agree	Strongly agree	Agree	Agree	Agree	Strongly agree	Agree	Agree	Agree	Unsure/neutral	Agree	Agree	Agree	Agree	Agree	Agree	Agree	Agree	Unsure/neutral	Unsure/neutral	Unsure/neutral	Agree	Unsure/neutral	Agree	Agree	Unsure/neutral	Agree	Agree	Agree	Disagree	Agree
Auckland Region	Strongly agree	Strongly agree	Strongly agree	Strongly agree	Strongly agree	Strongly agree	Strongly agree	Strongly agree	Strongly agree	Strongly agree	Strongly agree	Strongly agree	Strongly agree	Strongly agree	Strongly agree	Strongly agree	Strongly agree	Strongly agree	Strongly agree	Strongly agree	Strongly agree	Strongly agree	Strongly agree	Strongly agree	Strongly agree	Strongly agree	Strongly agree	Strongly agree	Strongly agree	Strongly agree	Strongly agree	Strongly agree	Strongly agree	Strongly agree	Strongly agree	Agree	Strongly agree	Agree	Strongly agree	Strongly agree	Strongly agree	Agree	Strongly agree	Strongly agree	Strongly agree	Strongly agree	Strongly agree	Strongly disagree	Strongly agree
Auckland Region	Disagree	Disagree	Strongly disagree	Unsure/neutral	Disagree	Disagree	Agree	Disagree	Unsure/neutral	Disagree	Agree	Agree	Agree	Disagree	Agree	Agree	Disagree	Unsure/neutral	Agree	Agree	Agree	Unsure/neutral	Unsure/neutral	Agree	Unsure/neutral	Disagree	Agree	Disagree	Agree	Disagree	Unsure/neutral	Agree	Agree	Unsure/neutral	Agree	Unsure/neutral	Agree	Disagree	Agree	Agree	Agree	Disagree	Disagree	Unsure/neutral	Agree	Agree	Agree	Disagree	Agree
Wellington Region	Strongly disagree	Disagree	Strongly disagree	Strongly disagree	Strongly disagree	Disagree	Strongly agree	Disagree	Unsure/neutral	Unsure/neutral	Agree	Strongly agree	Strongly agree	Strongly disagree	Strongly agree	Strongly agree	Disagree	Strongly disagree	Agree	Strongly agree	Strongly agree	Agree	Strongly agree	Strongly agree	Agree	Strongly agree	Agree	Strongly agree	Strongly disagree	Unsure/neutral	Strongly agree	Agree	Agree	Agree	Disagree	Strongly agree	Agree	Agree	Agree	Agree	Strongly agree	Strongly disagree	Strongly agree	Strongly agree	Disagree	Strongly agree	Strongly agree	Strongly disagree	Strongly agree
Northland Region	Strongly disagree	Disagree	Strongly disagree	Strongly agree	Unsure/neutral	Disagree	Strongly agree	Disagree	Disagree	Unsure/neutral	Unsure/neutral	Agree	Agree	Strongly disagree	Disagree	Disagree	Strongly agree	Strongly agree	Strongly agree	Unsure/neutral	Disagree	Unsure/neutral	Strongly disagree	Unsure/neutral	Disagree	Disagree	Disagree	Strongly disagree	Unsure/neutral	Disagree	Strongly disagree	Disagree	Disagree	Unsure/neutral	Strongly disagree	Strongly disagree	Unsure/neutral	Disagree	Disagree	Unsure/neutral	Disagree	Unsure/neutral	Unsure/neutral	Strongly disagree	Disagree	Disagree	Disagree	Unsure/neutral	Disagree
Auckland Region	Unsure/neutral	Unsure/neutral	Unsure/neutral	Unsure/neutral	Unsure/neutral	Disagree	Unsure/neutral	Unsure/neutral	Unsure/neutral	Unsure/neutral	Unsure/neutral	Unsure/neutral	Unsure/neutral	Strongly agree	Unsure/neutral	Unsure/neutral	Unsure/neutral	Unsure/neutral	Unsure/neutral	Unsure/neutral	Unsure/neutral	Unsure/neutral	Unsure/neutral	Unsure/neutral	Unsure/neutral	Disagree	Unsure/neutral	Agree	Unsure/neutral	Unsure/neutral	Unsure/neutral	Unsure/neutral	Agree	Unsure/neutral	Unsure/neutral	Agree	Agree	Agree	Agree	Unsure/neutral	Unsure/neutral	Unsure/neutral	Agree	Agree	Unsure/neutral	Unsure/neutral	Unsure/neutral	Unsure/neutral	Unsure/neutral
Northland Region	Strongly disagree	Strongly disagree	Strongly disagree	Strongly disagree	Strongly disagree	Strongly disagree	Strongly agree	Strongly disagree	Agree	Strongly disagree	Agree	Unsure/neutral	Unsure/neutral	Strongly disagree	Strongly agree	Strongly agree	Strongly disagree	Disagree	Unsure/neutral	Strongly agree	Strongly agree	Strongly agree	Strongly agree	Strongly agree	Strongly agree	Strongly agree	Strongly disagree	Agree	Strongly agree	Strongly agree	Agree	Agree	Strongly agree	Strongly agree	Disagree	Agree	Agree	Agree	Agree	Agree	Strongly agree	Disagree	Agree	Strongly agree	Disagree	Strongly agree	Strongly agree	Strongly disagree	Strongly agree
Otago Region	Strongly disagree	Strongly disagree	Strongly disagree	Disagree	Strongly disagree	Strongly disagree	Strongly disagree	Strongly disagree	Disagree	Disagree	Unsure/neutral	Unsure/neutral	Unsure/neutral	Strongly disagree	Agree	Agree	Unsure/neutral	Unsure/neutral	Agree	Agree	Agree	Agree	Agree	Strongly agree	Strongly agree	Unsure/neutral	Agree	Agree	Agree	Unsure/neutral	Agree	Unsure/neutral	Unsure/neutral	Agree	Disagree	Agree	Unsure/neutral	Agree	Unsure/neutral	Unsure/neutral	Agree	Disagree	Unsure/neutral	Agree	Disagree	Agree	Agree	Disagree	Agree
Auckland Region	Strongly disagree	Unsure/neutral	Strongly disagree	Unsure/neutral	Agree	Strongly agree	Agree	Strongly disagree	Agree	Unsure/neutral	Agree	Agree	Agree	Strongly disagree	Agree	Agree	Disagree	Unsure/neutral	Strongly agree	Strongly agree	Strongly agree	Unsure/neutral	Unsure/neutral	Strongly agree	Agree	Strongly agree	Strongly agree	Agree	Strongly agree	Agree	Agree	Agree	Agree	Strongly agree	Agree	Unsure/neutral	Agree	Agree	Agree	Agree	Strongly agree	Strongly agree	Agree	Agree	Unsure/neutral	Strongly agree	Strongly agree	Strongly disagree	Strongly agree
Canterbury Region	Strongly disagree	Disagree	Strongly disagree	Disagree	Strongly disagree	Unsure/neutral	Agree	Strongly disagree	Unsure/neutral	Disagree	Unsure/neutral	Strongly agree	Strongly agree	Strongly disagree	Strongly agree	Agree	Disagree	Disagree	Unsure/neutral	Strongly agree	Strongly agree	Strongly agree	Strongly agree	Strongly agree	Strongly agree	Disagree	Strongly agree	Strongly agree	Unsure/neutral	Strongly agree	Strongly agree	Strongly agree	Strongly agree	Strongly agree	Agree	Unsure/neutral	Unsure/neutral	Agree	Unsure/neutral	Agree	Strongly agree	Strongly disagree	Strongly agree	Agree	Strongly disagree	Strongly agree	Strongly agree	Strongly disagree	Strongly agree
Bay of Plenty Region	Strongly disagree	Strongly disagree	Strongly disagree	Strongly disagree	Unsure/neutral	Disagree	Strongly disagree	Strongly disagree	Unsure/neutral	Disagree	Unsure/neutral	Strongly disagree	Strongly disagree	Disagree	Unsure/neutral	Unsure/neutral	Unsure/neutral	Agree	Agree	Unsure/neutral	Agree	Agree	Agree	Agree	Agree	Agree	Agree	Agree	Unsure/neutral	Unsure/neutral	Agree	Agree	Unsure/neutral	Agree	Agree	Agree	Unsure/neutral	Agree	Unsure/neutral	Agree	Agree	Unsure/neutral	Agree	Agree	Agree	Agree	Agree	Unsure/neutral	Agree
Wellington Region	Disagree	Agree	Strongly disagree	Disagree	Disagree	Disagree	Agree	Unsure/neutral	Agree	Unsure/neutral	Disagree	Agree	Agree	Disagree	Agree	Agree	Agree	Agree	Agree	Agree	Agree	Agree	Agree	Agree	Agree	Agree	Agree	Agree	Agree	Agree	Agree	Disagree	Agree	Agree	Disagree	Agree	Agree	Agree	Agree	Agree	Agree	Disagree	Agree	Agree	Disagree	Agree	Agree	Disagree	Agree
Auckland Region	Strongly disagree	Unsure/neutral	Strongly disagree	Strongly disagree	Unsure/neutral	Disagree	Strongly agree	Strongly disagree	Strongly agree	Disagree	Agree	Agree	Agree	Disagree	Agree	Agree	Unsure/neutral	Agree	Strongly agree	Strongly agree	Strongly agree	Strongly agree	Strongly agree	Strongly agree	Strongly agree	Strongly agree	Strongly agree	Strongly agree	Disagree	Strongly agree	Strongly agree	Strongly agree	Agree	Strongly agree	Strongly agree	Strongly agree	Agree	Strongly agree	Strongly disagree	Strongly agree	Strongly agree	Disagree	Agree	Strongly agree	Disagree	Strongly agree	Strongly agree	Disagree	Strongly agree
Auckland Region	Disagree	Strongly disagree	Strongly disagree	Unsure/neutral	Disagree	Disagree	Agree	Disagree	Agree	Disagree	Unsure/neutral	Disagree	Disagree	Strongly disagree	Agree	Agree	Disagree	Unsure/neutral	Agree	Agree	Strongly agree	Strongly agree	Strongly agree	Strongly agree	Strongly agree	Agree	Agree	Unsure/neutral	Agree	Agree	Agree	Agree	Agree	Agree	Agree	Agree	Agree	Agree	Agree	Agree	Agree	Agree	Agree	Agree	Agree	Agree	Agree	Strongly disagree	Agree
Tasman/ Nelson Region	Disagree	Unsure/neutral	Disagree	Agree	Disagree	Disagree	Agree	Strongly disagree	Agree	Unsure/neutral	Disagree	Unsure/neutral	Unsure/neutral	Disagree	Strongly disagree	Unsure/neutral	Unsure/neutral	Unsure/neutral	Agree	Disagree	Disagree	Unsure/neutral	Disagree	Disagree	Disagree	Disagree	Unsure/neutral	Disagree	Disagree	Agree	Disagree	Agree	Agree	Disagree	Agree	Disagree	Disagree	Disagree	Disagree	Agree	Disagree	Disagree	Agree	Disagree	Disagree	Disagree	Disagree	Agree	Disagree
Wellington Region	Strongly disagree	Disagree	Strongly disagree	Strongly disagree	Strongly disagree	Disagree	Agree	Strongly disagree	Agree	Strongly disagree	Unsure/neutral	Agree	Agree	Strongly disagree	Strongly agree	Agree	Strongly disagree	Strongly disagree	Agree	Strongly agree	Strongly agree	Strongly agree	Strongly agree	Strongly agree	Strongly agree	Unsure/neutral	Strongly agree	Agree	Unsure/neutral	Unsure/neutral	Agree	Agree	Unsure/neutral	Agree	Agree	Unsure/neutral	Agree	Agree	Agree	Agree	Strongly agree	Unsure/neutral	Agree	Strongly agree	Unsure/neutral	Strongly agree	Strongly agree	Strongly disagree	Strongly agree
Canterbury Region	Strongly disagree	Strongly disagree	Strongly disagree	Agree	Unsure/neutral	Unsure/neutral	Strongly agree	Strongly disagree	Agree	Unsure/neutral	Agree	Unsure/neutral	Unsure/neutral	Strongly disagree	Strongly agree	Agree	Unsure/neutral	Strongly disagree	Agree	Strongly agree	Strongly disagree	Unsure/neutral	Strongly agree	Strongly agree	Strongly agree	Strongly agree	Strongly agree	Strongly agree	Strongly agree	Agree	Agree	Agree	Agree	Strongly agree	Agree	Agree	Agree	Strongly agree	Agree	Agree	Agree	Agree	Agree	Strongly agree	Unsure/neutral	Strongly agree	Strongly agree	Strongly disagree	Strongly agree
Bay of Plenty Region	Strongly disagree	Disagree	Disagree	Disagree	Disagree	Unsure/neutral	Agree	Strongly disagree	Unsure/neutral	Unsure/neutral	Agree	Unsure/neutral	Agree	Strongly disagree	Agree	Agree	Unsure/neutral	Unsure/neutral	Agree	Agree	Agree	Agree	Agree	Agree	Agree	Unsure/neutral	Unsure/neutral	Unsure/neutral	Unsure/neutral	Agree	Agree	Unsure/neutral	Unsure/neutral	Unsure/neutral	Unsure/neutral	Agree	Unsure/neutral	Agree	Unsure/neutral	Unsure/neutral	Agree	Disagree	Unsure/neutral	Agree	Disagree	Agree	Agree	Disagree	Agree
Canterbury Region	Strongly disagree	Strongly disagree	Strongly disagree	Agree	Disagree	Disagree	Strongly agree	Strongly disagree	Disagree	Agree	Disagree	Disagree	Strongly agree	Strongly disagree	Agree	Agree	Disagree	Disagree	Agree	Agree	Agree	Agree	Agree	Agree	Agree	Disagree	Disagree	Strongly disagree	Agree	Disagree	Agree	Agree	Strongly disagree	Agree	Disagree	Strongly disagree	Disagree	Strongly disagree	Disagree	Disagree	Agree	Disagree	Disagree	Agree	Strongly disagree	Strongly agree	Strongly agree	Strongly disagree	Strongly agree
Manawatu-Whanganui Region	Disagree	Agree	Disagree	Agree	Agree	Agree	Agree	Disagree	Unsure/neutral	Unsure/neutral	Agree	Agree	Disagree	Disagree	Unsure/neutral	Unsure/neutral	Agree	Agree	Agree	Unsure/neutral	Agree	Unsure/neutral	Agree	Agree	Agree	Agree	Unsure/neutral	Unsure/neutral	Unsure/neutral	Agree	Agree	Agree	Agree	Agree	Disagree	Agree	Unsure/neutral	Unsure/neutral	Disagree	Agree	Agree	Unsure/neutral	Agree	Agree	Unsure/neutral	Unsure/neutral	Unsure/neutral	Unsure/neutral	Unsure/neutral
Manawatu-Whanganui Region	Disagree	Unsure/neutral	Strongly disagree	Unsure/neutral	Disagree	Agree	Agree	Disagree	Agree	Unsure/neutral	Agree	Agree	Agree	Disagree	Unsure/neutral	Unsure/neutral	Disagree	Unsure/neutral	Agree	Agree	Agree	Agree	Agree	Agree	Agree	Agree	Unsure/neutral	Unsure/neutral	Agree	Agree	Agree	Agree	Agree	Agree	Agree	Agree	Unsure/neutral	Unsure/neutral	Unsure/neutral	Agree	Agree	Agree	Agree	Agree	Agree	Agree	Agree	Disagree	Agree
Wellington Region	Disagree	Agree	Disagree	Strongly agree	Unsure/neutral	Agree	Agree	Agree	Agree	Agree	Disagree	Unsure/neutral	Unsure/neutral	Strongly disagree	Strongly disagree	Unsure/neutral	Agree	Agree	Agree	Disagree	Disagree	Disagree	Agree	Unsure/neutral	Agree	Strongly disagree	Disagree	Strongly disagree	Agree	Unsure/neutral	Disagree	Unsure/neutral	Unsure/neutral	Disagree	Unsure/neutral	Strongly disagree	Disagree	Strongly disagree	Disagree	Unsure/neutral	Disagree	Unsure/neutral	Unsure/neutral	Disagree	Unsure/neutral	Strongly disagree	Disagree	Unsure/neutral	Disagree
Wellington Region	Disagree	Disagree	Disagree	Unsure/neutral	Disagree	Strongly disagree	Agree	Disagree	Unsure/neutral	Unsure/neutral	Agree	Agree	Agree	Disagree	Agree	Unsure/neutral	Unsure/neutral	Agree	Agree	Agree	Agree	Agree	Agree	Agree	Agree	Unsure/neutral	Agree	Unsure/neutral	Agree	Unsure/neutral	Agree	Agree	Unsure/neutral	Agree	Disagree	Unsure/neutral	Unsure/neutral	Unsure/neutral	Unsure/neutral	Unsure/neutral	Agree	Disagree	Unsure/neutral	Agree	Disagree	Agree	Agree	Unsure/neutral	Agree
Canterbury Region	Strongly disagree	Disagree	Strongly disagree	Disagree	Strongly disagree	Strongly disagree	Agree	Strongly disagree	Strongly agree	Strongly disagree	Agree	Strongly agree	Agree	Strongly disagree	Strongly agree	Agree	Strongly disagree	Disagree	Agree	Strongly agree	Strongly agree	Strongly agree	Strongly agree	Strongly agree	Strongly agree	Unsure/neutral	Agree	Agree	Strongly agree	Agree	Agree	Agree	Agree	Agree	Agree	Strongly agree	Strongly agree	Strongly agree	Agree	Strongly agree	Strongly agree	Strongly disagree	Strongly agree	Strongly agree	Disagree	Strongly agree	Strongly agree	Strongly disagree	Strongly agree
Auckland Region	Strongly disagree	Disagree	Strongly disagree	Agree	Unsure/neutral	Strongly disagree	Strongly agree	Strongly disagree	Strongly agree	Disagree	Agree	Disagree	Strongly agree	Strongly disagree	Agree	Agree	Unsure/neutral	Disagree	Strongly agree	Strongly agree	Agree	Strongly agree	Strongly agree	Strongly agree	Strongly agree	Agree	Strongly agree	Disagree	Strongly agree	Agree	Agree	Strongly agree	Strongly agree	Disagree	Strongly agree	Disagree	Strongly disagree	Disagree	Disagree	Agree	Agree	Disagree	Agree	Disagree	Strongly disagree	Agree	Agree	Strongly disagree	Agree
Hawke's Bay Region	Disagree	Disagree	Unsure/neutral	Agree	Disagree	Agree	Strongly agree	Disagree	Agree	Disagree	Unsure/neutral	Unsure/neutral	Unsure/neutral	Strongly disagree	Disagree	Agree	Agree	Strongly agree	Strongly agree	Agree	Unsure/neutral	Agree	Unsure/neutral	Agree	Agree	Unsure/neutral	Disagree	Disagree	Agree	Strongly disagree	Unsure/neutral	Strongly agree	Strongly disagree	Disagree	Agree	Strongly disagree	Disagree	Disagree	Disagree	Agree	Unsure/neutral	Strongly agree	Strongly disagree	Disagree	Agree	Unsure/neutral	Unsure/neutral	Disagree	Agree
Auckland Region	Strongly disagree	Agree	Strongly disagree	Disagree	Disagree	Unsure/neutral	Disagree	Unsure/neutral	Unsure/neutral	Unsure/neutral	Unsure/neutral	Unsure/neutral	Strongly disagree	Unsure/neutral	Agree	Unsure/neutral	Disagree	Unsure/neutral	Unsure/neutral	Agree	Strongly agree	Agree	Agree	Agree	Agree	Unsure/neutral	Unsure/neutral	Agree	Unsure/neutral	Unsure/neutral	Unsure/neutral	Unsure/neutral	Unsure/neutral	Unsure/neutral	Unsure/neutral	Agree	Agree	Agree	Unsure/neutral	Agree	Agree	Agree	Disagree	Strongly agree	Disagree	Strongly agree	Strongly agree	Strongly disagree	Agree
Auckland Region	Strongly disagree	Disagree	Strongly disagree	Agree	Strongly disagree	Strongly disagree	Agree	Strongly disagree	Agree	Disagree	Disagree	Strongly agree	Strongly agree	Disagree	Strongly agree	Strongly agree	Strongly agree	Strongly agree	Strongly agree	Strongly agree	Agree	Strongly agree	Agree	Agree	Agree	Agree	Agree	Agree	Agree	Agree	Agree	Agree	Agree	Agree	Agree	Agree	Agree	Agree	Agree	Agree	Agree	Agree	Agree	Agree	Agree	Agree	Agree	Agree	Agree
Canterbury Region	Disagree	Strongly disagree	Strongly disagree	Disagree	Unsure/neutral	Disagree	Strongly agree	Strongly disagree	Unsure/neutral	Disagree	Agree	Agree	Agree	Strongly disagree	Agree	Agree	Unsure/neutral	Agree	Agree	Strongly agree	Strongly agree	Strongly agree	Strongly agree	Strongly agree	Strongly agree	Strongly agree	Agree	Agree	Strongly agree	Strongly agree	Strongly agree	Strongly agree	Unsure/neutral	Agree	Agree	Strongly agree	Strongly agree	Strongly agree	Strongly agree	Strongly agree	Strongly agree	Disagree	Strongly agree	Strongly agree	Strongly agree	Strongly agree	Strongly agree	Strongly disagree	Strongly agree
Auckland Region	Unsure/neutral	Unsure/neutral	Agree	Strongly disagree	Disagree	Disagree	Agree	Agree	Agree	Unsure/neutral	Agree	Agree	Agree	Disagree	Disagree	Unsure/neutral	Agree	Unsure/neutral	Agree	Unsure/neutral	Agree	Disagree	Unsure/neutral	Unsure/neutral	Agree	Unsure/neutral	Disagree	Agree	Unsure/neutral	Unsure/neutral	Agree	Unsure/neutral	Unsure/neutral	Unsure/neutral	Disagree	Agree	Disagree	Disagree	Unsure/neutral	Unsure/neutral	Unsure/neutral	Disagree	Unsure/neutral	Agree	Unsure/neutral	Disagree	Agree	Unsure/neutral	Unsure/neutral
Auckland Region	Strongly disagree	Strongly disagree	Strongly disagree	Disagree	Strongly disagree	Agree	Strongly agree	Strongly disagree	Unsure/neutral	Strongly disagree	Unsure/neutral	Strongly disagree	Agree	Strongly disagree	Agree	Agree	Disagree	Disagree	Disagree	Agree	Agree	Agree	Agree	Agree	Agree	Agree	Agree	Agree	Unsure/neutral	Strongly agree	Agree	Agree	Agree	Strongly agree	Agree	Strongly agree	Disagree	Strongly agree	Unsure/neutral	Strongly agree	Strongly agree	Strongly disagree	Strongly agree	Strongly agree	Strongly agree	Strongly agree	Strongly agree	Strongly disagree	Strongly agree
Hawke's Bay Region	Strongly disagree	Disagree	Strongly disagree	Strongly disagree	Unsure/neutral	Agree	Agree	Disagree	Agree	Disagree	Agree	Agree	Disagree	Disagree	Agree	Agree	Unsure/neutral	Agree	Agree	Agree	Unsure/neutral	Unsure/neutral	Agree	Agree	Agree	Disagree	Agree	Disagree	Unsure/neutral	Unsure/neutral	Unsure/neutral	Agree	Disagree	Unsure/neutral	Agree	Strongly disagree	Unsure/neutral	Strongly disagree	Disagree	Unsure/neutral	Disagree	Unsure/neutral	Unsure/neutral	Disagree	Agree	Unsure/neutral	Disagree	Unsure/neutral	Unsure/neutral
Otago Region	Strongly disagree	Disagree	Strongly disagree	Strongly disagree	Strongly disagree	Strongly disagree	Agree	Strongly disagree	Disagree	Strongly disagree	Strongly agree	Unsure/neutral	Unsure/neutral	Strongly disagree	Strongly agree	Strongly agree	Disagree	Disagree	Agree	Strongly agree	Strongly agree	Strongly agree	Strongly agree	Strongly agree	Strongly agree	Strongly agree	Strongly agree	Strongly agree	Strongly agree	Strongly agree	Strongly agree	Strongly agree	Strongly agree	Strongly agree	Strongly agree	Strongly agree	Strongly agree	Strongly agree	Strongly agree	Strongly agree	Strongly agree	Disagree	Strongly agree	Strongly agree	Disagree	Strongly agree	Strongly agree	Strongly disagree	Strongly agree
Auckland Region	Disagree	Strongly disagree	Disagree	Unsure/neutral	Strongly disagree	Unsure/neutral	Strongly agree	Strongly disagree	Unsure/neutral	Agree	Disagree	Agree	Strongly agree	Strongly disagree	Unsure/neutral	Unsure/neutral	Agree	Agree	Agree	Strongly agree	Agree	Agree	Unsure/neutral	Agree	Unsure/neutral	Agree	Unsure/neutral	Disagree	Unsure/neutral	Unsure/neutral	Agree	Agree	Disagree	Unsure/neutral	Disagree	Unsure/neutral	Unsure/neutral	Disagree	Unsure/neutral	Unsure/neutral	Agree	Disagree	Unsure/neutral	Unsure/neutral	Disagree	Strongly agree	Strongly agree	Disagree	Agree
Manawatu-Whanganui Region	Strongly disagree	Unsure/neutral	Strongly disagree	Strongly disagree	Disagree	Unsure/neutral	Strongly agree	Disagree	Strongly agree	Disagree	Strongly agree	Disagree	Agree	Disagree	Agree	Agree	Unsure/neutral	Unsure/neutral	Agree	Agree	Strongly agree	Strongly agree	Strongly agree	Agree	Strongly agree	Strongly agree	Strongly agree	Strongly agree	Strongly agree	Agree	Strongly agree	Agree	Strongly agree	Strongly agree	Agree	Strongly agree	Strongly agree	Strongly agree	Disagree	Strongly agree	Strongly agree	Strongly disagree	Strongly agree	Strongly agree	Strongly disagree	Strongly agree	Strongly agree	Strongly disagree	Strongly agree
Waikato Region	Strongly disagree	Unsure/neutral	Strongly disagree	Agree	Strongly disagree	Disagree	Agree	Strongly disagree	Strongly agree	Unsure/neutral	Agree	Agree	Agree	Disagree	Agree	Strongly agree	Disagree	Disagree	Agree	Strongly agree	Agree	Agree	Agree	Strongly agree	Unsure/neutral	Disagree	Strongly agree	Unsure/neutral	Unsure/neutral	Disagree	Agree	Strongly agree	Disagree	Unsure/neutral	Agree	Disagree	Unsure/neutral	Unsure/neutral	Disagree	Disagree	Agree	Disagree	Disagree	Unsure/neutral	Disagree	Strongly agree	Strongly agree	Strongly disagree	Strongly agree
Manawatu-Whanganui Region	Strongly disagree	Disagree	Strongly disagree	Strongly disagree	Strongly disagree	Strongly disagree	Agree	Disagree	Agree	Disagree	Agree	Agree	Strongly agree	Strongly disagree	Strongly agree	Strongly agree	Strongly disagree	Strongly disagree	Strongly disagree	Strongly agree	Strongly agree	Strongly agree	Strongly agree	Strongly agree	Strongly agree	Strongly agree	Agree	Strongly agree	Strongly agree	Strongly agree	Strongly agree	Strongly agree	Agree	Strongly agree	Agree	Agree	Agree	Agree	Agree	Strongly agree	Strongly agree	Disagree	Strongly agree	Strongly agree	Disagree	Strongly agree	Strongly agree	Strongly disagree	Strongly agree
Auckland Region	Strongly disagree	Disagree	Strongly disagree	Agree	Disagree	Strongly disagree	Strongly agree	Strongly disagree	Unsure/neutral	Agree	Strongly agree	Strongly disagree	Strongly agree	Strongly disagree	Agree	Agree	Disagree	Agree	Strongly agree	Strongly agree	Agree	Strongly agree	Strongly agree	Agree	Strongly agree	Agree	Strongly agree	Unsure/neutral	Agree	Agree	Agree	Agree	Agree	Agree	Disagree	Strongly agree	Strongly agree	Agree	Agree	Agree	Strongly agree	Disagree	Agree	Agree	Disagree	Strongly agree	Strongly agree	Strongly disagree	Strongly agree
Auckland Region	Strongly disagree	Strongly disagree	Strongly disagree	Unsure/neutral	Disagree	Strongly disagree	Agree	Strongly disagree	Agree	Strongly agree	Agree	Agree	Agree	Strongly disagree	Agree	Unsure/neutral	Unsure/neutral	Disagree	Agree	Agree	Agree	Agree	Agree	Agree	Agree	Agree	Agree	Unsure/neutral	Agree	Agree	Agree	Agree	Agree	Agree	Agree	Unsure/neutral	Agree	Agree	Agree	Agree	Agree	Agree	Agree	Agree	Agree	Agree	Agree	Disagree	Agree
Bay of Plenty Region	Strongly disagree	Unsure/neutral	Strongly disagree	Strongly disagree	Strongly disagree	Strongly disagree	Strongly agree	Strongly disagree	Unsure/neutral	Strongly disagree	Strongly agree	Strongly agree	Strongly agree	Strongly disagree	Strongly agree	Strongly agree	Strongly disagree	Strongly disagree	Strongly agree	Strongly agree	Strongly agree	Strongly agree	Strongly agree	Strongly agree	Strongly agree	Strongly agree	Strongly agree	Strongly agree	Strongly agree	Strongly agree	Strongly agree	Strongly agree	Strongly agree	Strongly agree	Strongly agree	Strongly agree	Strongly disagree	Strongly agree	Strongly disagree	Strongly agree	Strongly agree	Strongly agree	Strongly agree	Strongly agree	Strongly agree	Strongly agree	Strongly agree	Strongly disagree	Strongly agree
Otago Region	Strongly disagree	Strongly disagree	Strongly disagree	Agree	Strongly disagree	Agree	Strongly agree	Strongly disagree	Strongly agree	Disagree	Agree	Strongly agree	Strongly agree	Strongly disagree	Strongly agree	Strongly agree	Disagree	Disagree	Agree	Strongly agree	Agree	Agree	Agree	Strongly agree	Agree	Strongly agree	Strongly agree	Agree	Agree	Agree	Agree	Strongly agree	Agree	Agree	Strongly agree	Agree	Strongly agree	Agree	Strongly agree	Strongly agree	Strongly agree	Disagree	Agree	Agree	Disagree	Strongly agree	Strongly agree	Strongly disagree	Strongly agree
Auckland Region	Strongly disagree	Disagree	Strongly disagree	Strongly disagree	Disagree	Disagree	Strongly agree	Strongly disagree	Agree	Strongly disagree	Strongly agree	Agree	Strongly agree	Strongly disagree	Agree	Unsure/neutral	Unsure/neutral	Agree	Strongly agree	Agree	Strongly agree	Agree	Strongly agree	Strongly agree	Strongly agree	Disagree	Agree	Disagree	Agree	Agree	Strongly agree	Disagree	Agree	Agree	Agree	Agree	Agree	Agree	Unsure/neutral	Agree	Agree	Disagree	Agree	Agree	Agree	Agree	Agree	Strongly disagree	Agree
Auckland Region	Strongly disagree	Strongly disagree	Strongly disagree	Disagree	Strongly disagree	Disagree	Strongly agree	Strongly disagree	Agree	Strongly disagree	Agree	Agree	Agree	Strongly disagree	Agree	Agree	Disagree	Disagree	Agree	Agree	Agree	Agree	Agree	Agree	Agree	Agree	Agree	Agree	Strongly agree	Agree	Agree	Agree	Agree	Agree	Unsure/neutral	Strongly agree	Agree	Agree	Agree	Agree	Agree	Unsure/neutral	Agree	Agree	Unsure/neutral	Strongly agree	Agree	Strongly disagree	Agree
Canterbury Region	Disagree	Strongly disagree	Strongly disagree	Disagree	Strongly disagree	Disagree	Agree	Disagree	Agree	Disagree	Agree	Strongly agree	Strongly agree	Strongly disagree	Agree	Agree	Disagree	Disagree	Disagree	Agree	Agree	Agree	Agree	Strongly agree	Agree	Agree	Agree	Agree	Unsure/neutral	Agree	Strongly agree	Agree	Agree	Agree	Agree	Agree	Unsure/neutral	Agree	Unsure/neutral	Strongly agree	Strongly agree	Strongly disagree	Agree	Strongly agree	Strongly disagree	Strongly agree	Strongly agree	Strongly disagree	Agree
Bay of Plenty Region	Strongly disagree	Agree	Disagree	Strongly agree	Disagree	Agree	Agree	Unsure/neutral	Strongly disagree	Strongly agree	Strongly disagree	Unsure/neutral	Unsure/neutral	Strongly disagree	Strongly disagree	Strongly disagree	Strongly agree	Agree	Strongly agree	Strongly disagree	Strongly disagree	Disagree	Unsure/neutral	Strongly disagree	Strongly disagree	Strongly disagree	Strongly disagree	Strongly disagree	Strongly agree	Strongly disagree	Strongly disagree	Strongly disagree	Disagree	Strongly disagree	Agree	Strongly disagree	Strongly disagree	Strongly disagree	Strongly disagree	Strongly disagree	Strongly disagree	Strongly agree	Strongly disagree	Strongly disagree	Agree	Strongly disagree	Strongly disagree	Strongly agree	Strongly disagree
Auckland Region	Strongly disagree	Strongly disagree	Strongly disagree	Disagree	Strongly disagree	Disagree	Strongly agree	Disagree	Agree	Disagree	Agree	Agree	Agree	Strongly disagree	Agree	Agree	Unsure/neutral	Unsure/neutral	Agree	Agree	Agree	Agree	Agree	Agree	Agree	Unsure/neutral	Agree	Disagree	Agree	Agree	Unsure/neutral	Agree	Agree	Unsure/neutral	Agree	Agree	Disagree	Unsure/neutral	Disagree	Agree	Agree	Disagree	Agree	Agree	Strongly disagree	Strongly agree	Strongly agree	Strongly disagree	Strongly agree
Waikato Region	Disagree	Unsure/neutral	Strongly disagree	Strongly disagree	Disagree	Disagree	Agree	Disagree	Agree	Unsure/neutral	Agree	Agree	Agree	Disagree	Unsure/neutral	Unsure/neutral	Unsure/neutral	Unsure/neutral	Agree	Unsure/neutral	Agree	Agree	Agree	Agree	Agree	Unsure/neutral	Agree	Agree	Unsure/neutral	Unsure/neutral	Agree	Agree	Unsure/neutral	Unsure/neutral	Agree	Agree	Agree	Agree	Agree	Agree	Agree	Agree	Agree	Agree	Agree	Agree	Agree	Strongly disagree	Agree
Canterbury Region	Strongly disagree	Disagree	Strongly disagree	Disagree	Disagree	Disagree	Strongly agree	Disagree	Agree	Disagree	Agree	Agree	Agree	Disagree	Agree	Agree	Unsure/neutral	Unsure/neutral	Disagree	Agree	Agree	Agree	Agree	Agree	Agree	Unsure/neutral	Agree	Unsure/neutral	Strongly agree	Agree	Agree	Agree	Agree	Agree	Agree	Agree	Agree	Agree	Agree	Agree	Agree	Disagree	Agree	Agree	Disagree	Agree	Agree	Strongly disagree	Agree
Manawatu-Whanganui Region	Strongly disagree	Strongly disagree	Strongly disagree	Strongly disagree	Strongly disagree	Strongly disagree	Strongly agree	Strongly disagree	Agree	Strongly disagree	Unsure/neutral	Unsure/neutral	Strongly disagree	Strongly disagree	Strongly agree	Strongly agree	Strongly agree	Strongly disagree	Strongly agree	Strongly agree	Strongly agree	Strongly agree	Strongly agree	Strongly agree	Strongly agree	Strongly agree	Strongly agree	Strongly agree	Unsure/neutral	Strongly agree	Strongly agree	Unsure/neutral	Unsure/neutral	Strongly agree	Unsure/neutral	Strongly agree	Strongly agree	Strongly agree	Strongly agree	Strongly agree	Strongly agree	Strongly disagree	Unsure/neutral	Strongly agree	Strongly disagree	Strongly agree	Strongly agree	Strongly disagree	Strongly agree
Auckland Region	Disagree	Disagree	Strongly disagree	Agree	Disagree	Disagree	Agree	Strongly disagree	Unsure/neutral	Strongly disagree	Agree	Unsure/neutral	Agree	Disagree	Agree	Agree	Unsure/neutral	Disagree	Unsure/neutral	Agree	Strongly agree	Agree	Agree	Strongly agree	Agree	Agree	Agree	Agree	Unsure/neutral	Agree	Strongly agree	Disagree	Agree	Strongly agree	Agree	Strongly agree	Unsure/neutral	Strongly agree	Unsure/neutral	Strongly agree	Strongly agree	Strongly disagree	Agree	Agree	Strongly disagree	Strongly agree	Strongly agree	Strongly disagree	Strongly agree
Canterbury Region	Strongly disagree	Disagree	Strongly disagree	Strongly disagree	Disagree	Disagree	Strongly agree	Disagree	Agree	Strongly disagree	Agree	Strongly agree	Agree	Disagree	Strongly agree	Strongly agree	Unsure/neutral	Unsure/neutral	Agree	Agree	Agree	Agree	Agree	Strongly agree	Agree	Agree	Agree	Unsure/neutral	Unsure/neutral	Agree	Unsure/neutral	Agree	Agree	Unsure/neutral	Unsure/neutral	Unsure/neutral	Unsure/neutral	Agree	Agree	Agree	Agree	Disagree	Strongly agree	Agree	Agree	Strongly agree	Agree	Disagree	Agree
Northland Region	Strongly disagree	Disagree	Strongly disagree	Strongly disagree	Strongly disagree	Strongly disagree	Strongly agree	Strongly disagree	Strongly agree	Strongly disagree	Strongly agree	Agree	Strongly agree	Disagree	Strongly agree	Agree	Strongly disagree	Disagree	Agree	Strongly agree	Strongly agree	Strongly agree	Strongly agree	Strongly agree	Strongly agree	Agree	Agree	Strongly agree	Unsure/neutral	Agree	Strongly agree	Agree	Agree	Strongly agree	Agree	Agree	Agree	Agree	Disagree	Agree	Agree	Agree	Agree	Agree	Disagree	Strongly agree	Strongly agree	Strongly disagree	Strongly agree
Waikato Region	Strongly disagree	Strongly disagree	Strongly disagree	Strongly agree	Disagree	Agree	Agree	Disagree	Strongly agree	Agree	Unsure/neutral	Disagree	Disagree	Strongly disagree	Strongly disagree	Strongly disagree	Strongly agree	Agree	Strongly agree	Agree	Strongly disagree	Disagree	Disagree	Disagree	Unsure/neutral	Disagree	Strongly disagree	Strongly disagree	Strongly agree	Disagree	Strongly disagree	Disagree	Disagree	Strongly disagree	Disagree	Disagree	Disagree	Disagree	Disagree	Disagree	Disagree	Disagree	Disagree	Strongly disagree	Disagree	Disagree	Strongly disagree	Strongly agree	Disagree
Tasman/ Nelson Region	Strongly disagree	Disagree	Strongly disagree	Strongly disagree	Strongly disagree	Strongly disagree	Strongly agree	Strongly disagree	Agree	Strongly agree	Agree	Agree	Agree	Strongly disagree	Unsure/neutral	Agree	Agree	Strongly agree	Disagree	Strongly agree	Unsure/neutral	Unsure/neutral	Agree	Unsure/neutral	Unsure/neutral	Disagree	Unsure/neutral	Unsure/neutral	Unsure/neutral	Strongly agree	Unsure/neutral	Strongly agree	Strongly agree	Agree	Strongly agree	Disagree	Unsure/neutral	Strongly agree	Disagree	Strongly agree	Agree	Strongly disagree	Unsure/neutral	Disagree	Disagree	Agree	Agree	Strongly disagree	Agree
Canterbury Region	Strongly disagree	Disagree	Strongly disagree	Agree	Strongly disagree	Strongly disagree	Strongly agree	Strongly disagree	Strongly agree	Disagree	Unsure/neutral	Strongly agree	Strongly agree	Strongly disagree	Strongly agree	Strongly agree	Unsure/neutral	Agree	Strongly agree	Strongly agree	Strongly agree	Strongly agree	Strongly agree	Strongly agree	Strongly agree	Strongly agree	Strongly agree	Strongly agree	Strongly agree	Unsure/neutral	Strongly agree	Strongly disagree	Unsure/neutral	Agree	Strongly disagree	Strongly agree	Strongly agree	Strongly agree	Strongly agree	Strongly agree	Strongly agree	Strongly agree	Strongly agree	Strongly agree	Strongly agree	Strongly agree	Strongly agree	Strongly disagree	Strongly agree
Wellington Region	Strongly disagree	Strongly disagree	Strongly disagree	Disagree	Strongly disagree	Strongly disagree	Agree	Strongly disagree	Unsure/neutral	Strongly disagree	Unsure/neutral	Unsure/neutral	Strongly agree	Strongly disagree	Strongly agree	Strongly agree	Strongly disagree	Strongly disagree	Strongly agree	Strongly agree	Strongly agree	Strongly agree	Strongly agree	Strongly agree	Strongly agree	Strongly agree	Strongly agree	Strongly agree	Strongly agree	Strongly agree	Strongly agree	Strongly agree	Strongly agree	Strongly agree	Strongly agree	Strongly agree	Strongly agree	Strongly agree	Strongly agree	Strongly agree	Strongly agree	Strongly agree	Strongly agree	Strongly agree	Strongly agree	Strongly agree	Strongly agree	Strongly agree	Strongly agree
Waikato Region	Strongly disagree	Disagree	Strongly disagree	Unsure/neutral	Strongly disagree	Disagree	Strongly agree	Strongly disagree	Unsure/neutral	Disagree	Strongly agree	Strongly agree	Strongly agree	Strongly disagree	Agree	Agree	Unsure/neutral	Agree	Unsure/neutral	Strongly agree	Unsure/neutral	Strongly agree	Agree	Agree	Agree	Agree	Strongly agree	Agree	Unsure/neutral	Agree	Agree	Agree	Agree	Strongly agree	Agree	Agree	Strongly agree	Strongly agree	Agree	Strongly agree	Strongly agree	Agree	Strongly agree	Strongly agree	Agree	Strongly agree	Strongly agree	Disagree	Strongly agree
Manawatu-Whanganui Region	Strongly disagree	Disagree	Strongly disagree	Agree	Strongly disagree	Disagree	Strongly agree	Unsure/neutral	Disagree	Unsure/neutral	Disagree	Agree	Strongly agree	Strongly disagree	Agree	Agree	Unsure/neutral	Unsure/neutral	Agree	Agree	Agree	Agree	Agree	Agree	Unsure/neutral	Disagree	Unsure/neutral	Disagree	Agree	Agree	Disagree	Disagree	Agree	Unsure/neutral	Disagree	Unsure/neutral	Disagree	Unsure/neutral	Strongly disagree	Agree	Agree	Disagree	Agree	Unsure/neutral	Disagree	Unsure/neutral	Agree	Disagree	Agree
Wellington Region	Strongly disagree	Strongly disagree	Strongly disagree	Strongly disagree	Strongly disagree	Strongly agree	Strongly agree	Strongly disagree	Agree	Strongly disagree	Unsure/neutral	Unsure/neutral	Unsure/neutral	Strongly disagree	Strongly agree	Strongly agree	Strongly disagree	Strongly disagree	Strongly disagree	Strongly agree	Strongly agree	Strongly agree	Strongly agree	Strongly agree	Strongly agree	Strongly agree	Strongly agree	Strongly agree	Strongly agree	Strongly agree	Strongly agree	Strongly disagree	Strongly agree	Strongly agree	Strongly disagree	Agree	Agree	Strongly agree	Disagree	Agree	Strongly agree	Strongly disagree	Strongly agree	Strongly agree	Strongly disagree	Strongly agree	Strongly agree	Strongly disagree	Strongly agree
Auckland Region	Disagree	Disagree	Strongly disagree	Disagree	Disagree	Disagree	Agree	Disagree	Disagree	Unsure/neutral	Agree	Agree	Agree	Disagree	Agree	Agree	Unsure/neutral	Unsure/neutral	Agree	Agree	Agree	Unsure/neutral	Agree	Agree	Agree	Agree	Agree	Agree	Disagree	Unsure/neutral	Agree	Agree	Unsure/neutral	Agree	Agree	Disagree	Disagree	Unsure/neutral	Disagree	Disagree	Agree	Agree	Unsure/neutral	Agree	Disagree	Agree	Agree	Disagree	Unsure/neutral
Auckland Region	Strongly disagree	Strongly disagree	Strongly disagree	Disagree	Strongly disagree	Disagree	Strongly agree	Strongly disagree	Strongly agree	Disagree	Strongly agree	Strongly agree	Strongly agree	Strongly disagree	Agree	Strongly agree	Unsure/neutral	Agree	Strongly agree	Unsure/neutral	Agree	Agree	Agree	Agree	Agree	Unsure/neutral	Unsure/neutral	Agree	Strongly agree	Agree	Agree	Disagree	Agree	Agree	Disagree	Unsure/neutral	Agree	Agree	Agree	Agree	Agree	Disagree	Agree	Agree	Disagree	Strongly agree	Strongly agree	Strongly disagree	Strongly agree
Auckland Region	Disagree	Unsure/neutral	Disagree	Agree	Disagree	Disagree	Agree	Disagree	Agree	Disagree	Agree	Disagree	Agree	Disagree	Unsure/neutral	Agree	Unsure/neutral	Unsure/neutral	Agree	Agree	Unsure/neutral	Agree	Agree	Agree	Agree	Agree	Unsure/neutral	Unsure/neutral	Unsure/neutral	Unsure/neutral	Unsure/neutral	Unsure/neutral	Unsure/neutral	Unsure/neutral	Unsure/neutral	Unsure/neutral	Disagree	Agree	Disagree	Agree	Agree	Disagree	Agree	Agree	Disagree	Agree	Agree	Disagree	Agree
Waikato Region	Disagree	Disagree	Disagree	Unsure/neutral	Disagree	Disagree	Agree	Disagree	Unsure/neutral	Disagree	Unsure/neutral	Unsure/neutral	Agree	Disagree	Disagree	Disagree	Unsure/neutral	Agree	Agree	Disagree	Disagree	Agree	Disagree	Unsure/neutral	Strongly disagree	Disagree	Disagree	Disagree	Unsure/neutral	Disagree	Disagree	Disagree	Agree	Disagree	Unsure/neutral	Disagree	Disagree	Strongly disagree	Disagree	Strongly disagree	Strongly disagree	Disagree	Unsure/neutral	Disagree	Strongly disagree	Strongly disagree	Strongly disagree	Agree	Strongly disagree
Canterbury Region	Strongly disagree	Strongly disagree	Strongly disagree	Strongly disagree	Strongly disagree	Strongly disagree	Strongly agree	Strongly disagree	Agree	Strongly disagree	Strongly agree	Agree	Agree	Strongly disagree	Strongly agree	Strongly agree	Strongly disagree	Strongly disagree	Unsure/neutral	Strongly agree	Strongly agree	Strongly agree	Strongly agree	Strongly agree	Strongly agree	Agree	Strongly agree	Strongly agree	Disagree	Agree	Strongly agree	Strongly disagree	Strongly agree	Strongly agree	Strongly disagree	Strongly agree	Strongly agree	Strongly agree	Strongly agree	Agree	Strongly agree	Strongly disagree	Strongly agree	Strongly agree	Strongly disagree	Strongly agree	Strongly agree	Strongly disagree	Strongly agree
Waikato Region	Disagree	Disagree	Disagree	Unsure/neutral	Unsure/neutral	Disagree	Agree	Disagree	Agree	Unsure/neutral	Unsure/neutral	Unsure/neutral	Unsure/neutral	Unsure/neutral	Agree	Agree	Disagree	Disagree	Unsure/neutral	Agree	Agree	Agree	Agree	Agree	Agree	Unsure/neutral	Unsure/neutral	Unsure/neutral	Disagree	Agree	Agree	Agree	Agree	Agree	Agree	Disagree	Unsure/neutral	Disagree	Disagree	Agree	Unsure/neutral	Strongly agree	Unsure/neutral	Disagree	Strongly agree	Disagree	Disagree	Agree	Disagree
Manawatu-Whanganui Region	Disagree	Disagree	Unsure/neutral	Strongly agree	Disagree	Strongly agree	Agree	Unsure/neutral	Disagree	Strongly agree	Strongly disagree	Strongly disagree	Strongly disagree	Strongly disagree	Disagree	Disagree	Strongly agree	Strongly agree	Strongly agree	Disagree	Disagree	Disagree	Unsure/neutral	Disagree	Unsure/neutral	Disagree	Disagree	Disagree	Agree	Agree	Disagree	Unsure/neutral	Agree	Disagree	Disagree	Strongly disagree	Strongly disagree	Strongly disagree	Strongly disagree	Agree	Strongly disagree	Strongly disagree	Agree	Strongly disagree	Strongly disagree	Strongly disagree	Strongly disagree	Strongly agree	Strongly disagree
Otago Region	Disagree	Disagree	Disagree	Disagree	Strongly disagree	Disagree	Disagree	Disagree	Unsure/neutral	Disagree	Agree	Unsure/neutral	Agree	Disagree	Agree	Agree	Disagree	Unsure/neutral	Disagree	Agree	Agree	Agree	Agree	Agree	Agree	Agree	Agree	Agree	Agree	Agree	Agree	Agree	Agree	Agree	Agree	Agree	Agree	Agree	Agree	Agree	Agree	Disagree	Agree	Agree	Agree	Agree	Agree	Disagree	Agree
Wellington Region	Strongly disagree	Disagree	Agree	Strongly disagree	Strongly disagree	Strongly agree	Strongly agree	Disagree	Agree	Strongly disagree	Strongly agree	Strongly agree	Strongly agree	Disagree	Strongly agree	Agree	Disagree	Disagree	Agree	Disagree	Strongly agree	Strongly agree	Strongly agree	Strongly agree	Strongly agree	Agree	Agree	Strongly agree	Strongly agree	Strongly agree	Strongly agree	Agree	Strongly agree	Agree	Agree	Strongly agree	Strongly agree	Strongly agree	Agree	Strongly agree	Strongly agree	Strongly agree	Strongly agree	Strongly agree	Strongly agree	Strongly agree	Strongly agree	Disagree	Strongly agree
Wellington Region	Strongly disagree	Disagree	Strongly disagree	Disagree	Strongly disagree	Strongly disagree	Agree	Strongly disagree	Agree	Disagree	Agree	Agree	Agree	Strongly disagree	Disagree	Unsure/neutral	Agree	Strongly disagree	Agree	Agree	Unsure/neutral	Strongly agree	Strongly agree	Agree	Agree	Agree	Agree	Unsure/neutral	Strongly agree	Agree	Unsure/neutral	Strongly disagree	Agree	Agree	Disagree	Unsure/neutral	Unsure/neutral	Unsure/neutral	Unsure/neutral	Strongly agree	Agree	Strongly disagree	Agree	Unsure/neutral	Strongly disagree	Agree	Agree	Strongly disagree	Agree
Hawke's Bay Region	Disagree	Disagree	Disagree	Agree	Disagree	Agree	Agree	Disagree	Agree	Agree	Unsure/neutral	Unsure/neutral	Agree	Disagree	Disagree	Disagree	Agree	Agree	Agree	Disagree	Disagree	Disagree	Disagree	Disagree	Disagree	Disagree	Unsure/neutral	Disagree	Unsure/neutral	Agree	Disagree	Disagree	Unsure/neutral	Strongly disagree	Unsure/neutral	Strongly disagree	Strongly disagree	Strongly disagree	Strongly disagree	Unsure/neutral	Strongly disagree	Disagree	Unsure/neutral	Strongly disagree	Strongly disagree	Strongly disagree	Strongly disagree	Strongly agree	Strongly disagree
Canterbury Region	Strongly disagree	Agree	Disagree	Unsure/neutral	Unsure/neutral	Unsure/neutral	Agree	Disagree	Agree	Unsure/neutral	Unsure/neutral	Unsure/neutral	Agree	Disagree	Agree	Agree	Unsure/neutral	Agree	Unsure/neutral	Agree	Unsure/neutral	Agree	Agree	Agree	Agree	Agree	Agree	Agree	Disagree	Unsure/neutral	Agree	Unsure/neutral	Unsure/neutral	Unsure/neutral	Agree	Unsure/neutral	Agree	Unsure/neutral	Unsure/neutral	Unsure/neutral	Unsure/neutral	Unsure/neutral	Disagree	Unsure/neutral	Unsure/neutral	Unsure/neutral	Agree	Unsure/neutral	Unsure/neutral
Waikato Region	Strongly disagree	Strongly disagree	Strongly disagree	Strongly disagree	Disagree	Strongly disagree	Strongly agree	Strongly disagree	Strongly disagree	Strongly disagree	Unsure/neutral	Agree	Strongly agree	Strongly disagree	Agree	Agree	Strongly disagree	Agree	Agree	Strongly agree	Strongly agree	Strongly agree	Strongly agree	Strongly agree	Strongly agree	Strongly agree	Strongly agree	Agree	Strongly agree	Unsure/neutral	Strongly agree	Agree	Strongly agree	Strongly agree	Strongly agree	Strongly agree	Unsure/neutral	Strongly agree	Disagree	Agree	Strongly agree	Strongly disagree	Strongly agree	Strongly agree	Strongly disagree	Strongly agree	Strongly agree	Strongly disagree	Strongly agree
Otago Region	Disagree	Unsure/neutral	Unsure/neutral	Agree	Unsure/neutral	Disagree	Agree	Disagree	Unsure/neutral	Unsure/neutral	Agree	Strongly disagree	Disagree	Strongly disagree	Disagree	Disagree	Agree	Agree	Agree	Disagree	Unsure/neutral	Disagree	Agree	Unsure/neutral	Disagree	Unsure/neutral	Disagree	Unsure/neutral	Agree	Unsure/neutral	Agree	Agree	Agree	Unsure/neutral	Agree	Unsure/neutral	Disagree	Disagree	Disagree	Unsure/neutral	Unsure/neutral	Agree	Agree	Unsure/neutral	Disagree	Disagree	Disagree	Unsure/neutral	Disagree
Waikato Region	Disagree	Unsure/neutral	Disagree	Unsure/neutral	Disagree	Disagree	Agree	Disagree	Agree	Unsure/neutral	Unsure/neutral	Agree	Unsure/neutral	Disagree	Agree	Unsure/neutral	Agree	Agree	Agree	Unsure/neutral	Unsure/neutral	Agree	Agree	Agree	Unsure/neutral	Unsure/neutral	Unsure/neutral	Disagree	Unsure/neutral	Disagree	Unsure/neutral	Agree	Disagree	Unsure/neutral	Agree	Agree	Unsure/neutral	Unsure/neutral	Unsure/neutral	Disagree	Unsure/neutral	Agree	Disagree	Disagree	Disagree	Disagree	Agree	Disagree	Disagree
Auckland Region	Strongly disagree	Strongly disagree	Strongly disagree	Strongly disagree	Strongly disagree	Unsure/neutral	Strongly agree	Strongly disagree	Strongly agree	Unsure/neutral	Agree	Agree	Strongly agree	Strongly disagree	Strongly agree	Strongly agree	Unsure/neutral	Disagree	Disagree	Strongly agree	Strongly agree	Strongly agree	Strongly agree	Strongly agree	Strongly agree	Strongly agree	Strongly agree	Strongly agree	Strongly agree	Strongly agree	Strongly agree	Strongly disagree	Strongly agree	Strongly agree	Disagree	Strongly agree	Agree	Strongly agree	Strongly disagree	Strongly agree	Strongly agree	Strongly disagree	Strongly agree	Strongly agree	Strongly disagree	Strongly agree	Strongly agree	Strongly disagree	Strongly agree
Auckland Region	Strongly disagree	Strongly disagree	Strongly disagree	Disagree	Strongly disagree	Strongly disagree	Strongly agree	Strongly disagree	Agree	Strongly disagree	Strongly agree	Disagree	Unsure/neutral	Strongly disagree	Agree	Agree	Disagree	Disagree	Strongly agree	Strongly agree	Strongly agree	Strongly agree	Strongly agree	Strongly agree	Strongly agree	Agree	Unsure/neutral	Agree	Unsure/neutral	Agree	Agree	Strongly disagree	Strongly agree	Strongly agree	Disagree	Strongly agree	Disagree	Strongly agree	Strongly disagree	Strongly agree	Strongly agree	Strongly disagree	Strongly agree	Strongly agree	Strongly disagree	Strongly agree	Strongly agree	Strongly disagree	Strongly agree
Wellington Region	Strongly disagree	Disagree	Strongly disagree	Disagree	Strongly disagree	Strongly disagree	Unsure/neutral	Strongly disagree	Agree	Strongly disagree	Strongly agree	Agree	Strongly agree	Strongly disagree	Strongly agree	Strongly agree	Strongly disagree	Disagree	Agree	Strongly agree	Strongly agree	Agree	Agree	Agree	Agree	Agree	Agree	Unsure/neutral	Disagree	Agree	Agree	Strongly agree	Agree	Agree	Strongly agree	Disagree	Disagree	Agree	Disagree	Agree	Agree	Disagree	Agree	Agree	Disagree	Agree	Agree	Disagree	Agree
Auckland Region	Strongly disagree	Unsure/neutral	Strongly disagree	Disagree	Strongly disagree	Agree	Strongly agree	Agree	Disagree	Agree	Unsure/neutral	Agree	Agree	Unsure/neutral	Strongly agree	Agree	Unsure/neutral	Agree	Strongly agree	Strongly agree	Unsure/neutral	Strongly agree	Agree	Agree	Unsure/neutral	Unsure/neutral	Agree	Unsure/neutral	Disagree	Agree	Unsure/neutral	Agree	Unsure/neutral	Agree	Agree	Strongly agree	Disagree	Unsure/neutral	Unsure/neutral	Agree	Strongly agree	Disagree	Agree	Agree	Disagree	Strongly agree	Agree	Disagree	Agree
Auckland Region	Disagree	Strongly disagree	Strongly disagree	Agree	Strongly disagree	Agree	Strongly agree	Disagree	Disagree	Agree	Agree	Disagree	Disagree	Strongly disagree	Agree	Disagree	Agree	Disagree	Agree	Strongly agree	Agree	Agree	Agree	Agree	Agree	Agree	Disagree	Unsure/neutral	Strongly agree	Disagree	Agree	Strongly disagree	Unsure/neutral	Agree	Strongly disagree	Unsure/neutral	Agree	Disagree	Disagree	Agree	Agree	Disagree	Agree	Agree	Disagree	Agree	Agree	Strongly disagree	Agree
Manawatu-Whanganui Region	Strongly disagree	Disagree	Disagree	Unsure/neutral	Disagree	Disagree	Agree	Disagree	Unsure/neutral	Unsure/neutral	Agree	Disagree	Disagree	Strongly disagree	Agree	Unsure/neutral	Disagree	Agree	Agree	Unsure/neutral	Disagree	Unsure/neutral	Disagree	Disagree	Disagree	Strongly disagree	Disagree	Strongly disagree	Strongly agree	Strongly disagree	Disagree	Agree	Disagree	Disagree	Agree	Strongly disagree	Strongly disagree	Strongly disagree	Strongly disagree	Strongly disagree	Strongly disagree	Strongly disagree	Strongly disagree	Strongly disagree	Strongly disagree	Strongly disagree	Strongly disagree	Strongly agree	Strongly disagree
Wellington Region	Strongly disagree	Strongly disagree	Strongly disagree	Unsure/neutral	Strongly disagree	Unsure/neutral	Agree	Disagree	Unsure/neutral	Unsure/neutral	Unsure/neutral	Agree	Agree	Strongly disagree	Unsure/neutral	Agree	Unsure/neutral	Unsure/neutral	Agree	Agree	Agree	Agree	Agree	Agree	Agree	Agree	Unsure/neutral	Unsure/neutral	Unsure/neutral	Agree	Agree	Unsure/neutral	Agree	Agree	Agree	Agree	Unsure/neutral	Unsure/neutral	Unsure/neutral	Agree	Agree	Disagree	Agree	Agree	Disagree	Agree	Agree	Disagree	Agree
Auckland Region	Strongly disagree	Disagree	Strongly disagree	Disagree	Strongly disagree	Disagree	Strongly agree	Disagree	Agree	Disagree	Agree	Agree	Strongly agree	Strongly disagree	Strongly agree	Strongly agree	Disagree	Strongly disagree	Agree	Strongly agree	Strongly agree	Strongly agree	Strongly agree	Strongly agree	Strongly agree	Strongly agree	Agree	Strongly agree	Unsure/neutral	Strongly agree	Strongly agree	Agree	Strongly agree	Strongly agree	Agree	Agree	Unsure/neutral	Strongly agree	Unsure/neutral	Strongly agree	Strongly agree	Strongly disagree	Agree	Strongly agree	Strongly disagree	Strongly agree	Strongly agree	Strongly disagree	Strongly agree
Canterbury Region	Disagree	Disagree	Disagree	Unsure/neutral	Unsure/neutral	Unsure/neutral	Agree	Disagree	Unsure/neutral	Disagree	Strongly disagree	Unsure/neutral	Strongly agree	Strongly disagree	Unsure/neutral	Disagree	Unsure/neutral	Agree	Agree	Unsure/neutral	Unsure/neutral	Unsure/neutral	Unsure/neutral	Unsure/neutral	Unsure/neutral	Disagree	Disagree	Strongly disagree	Agree	Disagree	Unsure/neutral	Disagree	Disagree	Disagree	Disagree	Strongly disagree	Disagree	Strongly disagree	Disagree	Disagree	Disagree	Disagree	Disagree	Disagree	Disagree	Agree	Agree	Disagree	Agree
Auckland Region	Disagree	Disagree	Disagree	Unsure/neutral	Disagree	Strongly disagree	Agree	Strongly disagree	Agree	Agree	Agree	Strongly agree	Agree	Strongly disagree	Unsure/neutral	Unsure/neutral	Agree	Unsure/neutral	Agree	Agree	Unsure/neutral	Unsure/neutral	Agree	Agree	Unsure/neutral	Unsure/neutral	Unsure/neutral	Disagree	Agree	Unsure/neutral	Unsure/neutral	Unsure/neutral	Unsure/neutral	Disagree	Agree	Unsure/neutral	Agree	Disagree	Disagree	Unsure/neutral	Unsure/neutral	Unsure/neutral	Disagree	Disagree	Disagree	Unsure/neutral	Agree	Disagree	Agree
Auckland Region	Strongly disagree	Strongly disagree	Strongly disagree	Disagree	Strongly agree	Agree	Agree	Strongly disagree	Agree	Strongly disagree	Strongly agree	Agree	Unsure/neutral	Strongly disagree	Strongly agree	Strongly agree	Agree	Disagree	Strongly agree	Strongly agree	Strongly agree	Agree	Strongly agree	Strongly agree	Strongly agree	Agree	Strongly agree	Strongly agree	Disagree	Agree	Strongly agree	Strongly agree	Agree	Strongly agree	Strongly agree	Strongly agree	Agree	Strongly agree	Agree	Strongly agree	Strongly agree	Strongly disagree	Agree	Strongly agree	Strongly disagree	Strongly agree	Strongly agree	Strongly disagree	Strongly agree
Auckland Region	Strongly disagree	Disagree	Strongly disagree	Strongly disagree	Strongly disagree	Strongly disagree	Agree	Strongly disagree	Strongly agree	Disagree	Strongly agree	Agree	Agree	Strongly disagree	Strongly agree	Strongly agree	Strongly disagree	Strongly disagree	Disagree	Strongly agree	Strongly agree	Strongly agree	Strongly agree	Strongly agree	Strongly agree	Strongly agree	Strongly agree	Strongly agree	Disagree	Strongly agree	Strongly agree	Unsure/neutral	Strongly agree	Strongly agree	Unsure/neutral	Strongly agree	Agree	Strongly agree	Agree	Agree	Agree	Unsure/neutral	Agree	Agree	Disagree	Strongly agree	Strongly agree	Strongly disagree	Strongly agree
Auckland Region	Disagree	Unsure/neutral	Disagree	Unsure/neutral	Disagree	Disagree	Agree	Disagree	Unsure/neutral	Unsure/neutral	Agree	Unsure/neutral	Unsure/neutral	Disagree	Agree	Agree	Unsure/neutral	Disagree	Agree	Agree	Agree	Agree	Agree	Agree	Agree	Agree	Agree	Agree	Unsure/neutral	Unsure/neutral	Agree	Agree	Unsure/neutral	Agree	Agree	Agree	Disagree	Strongly agree	Disagree	Agree	Strongly agree	Disagree	Agree	Strongly agree	Disagree	Strongly agree	Strongly agree	Disagree	Strongly agree
Hawke's Bay Region	Strongly disagree	Disagree	Agree	Unsure/neutral	Strongly disagree	Unsure/neutral	Strongly agree	Disagree	Strongly agree	Agree	Disagree	Disagree	Disagree	Strongly disagree	Unsure/neutral	Agree	Disagree	Agree	Agree	Unsure/neutral	Unsure/neutral	Disagree	Unsure/neutral	Agree	Unsure/neutral	Disagree	Agree	Disagree	Agree	Disagree	Disagree	Agree	Disagree	Unsure/neutral	Agree	Disagree	Disagree	Disagree	Disagree	Disagree	Disagree	Unsure/neutral	Disagree	Disagree	Disagree	Unsure/neutral	Agree	Unsure/neutral	Disagree
Bay of Plenty Region	Strongly disagree	Disagree	Strongly disagree	Strongly disagree	Unsure/neutral	Strongly disagree	Strongly agree	Disagree	Strongly agree	Disagree	Strongly agree	Disagree	Disagree	Strongly disagree	Strongly agree	Strongly agree	Unsure/neutral	Agree	Agree	Strongly agree	Agree	Disagree	Agree	Agree	Agree	Agree	Agree	Unsure/neutral	Strongly agree	Agree	Agree	Agree	Agree	Agree	Agree	Strongly agree	Unsure/neutral	Strongly agree	Agree	Strongly agree	Strongly agree	Agree	Agree	Agree	Unsure/neutral	Agree	Agree	Disagree	Agree
Wellington Region	Disagree	Unsure/neutral	Disagree	Strongly agree	Disagree	Strongly agree	Strongly agree	Unsure/neutral	Disagree	Strongly agree	Strongly disagree	Strongly disagree	Strongly disagree	Strongly disagree	Strongly disagree	Strongly disagree	Strongly agree	Strongly agree	Strongly agree	Strongly disagree	Strongly disagree	Strongly disagree	Disagree	Strongly disagree	Disagree	Strongly disagree	Strongly disagree	Strongly disagree	Strongly agree	Disagree	Strongly disagree	Strongly disagree	Unsure/neutral	Strongly disagree	Strongly disagree	Strongly disagree	Strongly disagree	Strongly disagree	Strongly disagree	Disagree	Strongly disagree	Strongly disagree	Disagree	Strongly disagree	Disagree	Strongly disagree	Strongly disagree	Strongly agree	Strongly disagree
Canterbury Region	Strongly disagree	Strongly disagree	Strongly disagree	Unsure/neutral	Strongly disagree	Strongly disagree	Strongly disagree	Strongly disagree	Strongly disagree	Strongly disagree	Agree	Strongly agree	Strongly agree	Strongly disagree	Strongly agree	Strongly agree	Strongly disagree	Strongly disagree	Strongly disagree	Strongly agree	Strongly agree	Strongly agree	Strongly agree	Strongly agree	Strongly agree	Agree	Agree	Strongly agree	Strongly agree	Agree	Strongly agree	Disagree	Unsure/neutral	Strongly agree	Unsure/neutral	Strongly agree	Agree	Agree	Unsure/neutral	Agree	Agree	Disagree	Agree	Strongly agree	Disagree	Strongly agree	Strongly agree	Strongly disagree	Strongly agree
Auckland Region	Strongly disagree	Disagree	Strongly disagree	Disagree	Disagree	Strongly disagree	Strongly agree	Strongly disagree	Unsure/neutral	Unsure/neutral	Strongly agree	Agree	Agree	Disagree	Strongly agree	Strongly agree	Unsure/neutral	Disagree	Agree	Strongly agree	Strongly agree	Strongly agree	Agree	Agree	Agree	Agree	Agree	Agree	Strongly agree	Strongly agree	Agree	Agree	Strongly agree	Agree	Agree	Agree	Unsure/neutral	Agree	Unsure/neutral	Agree	Agree	Disagree	Agree	Agree	Disagree	Strongly agree	Strongly agree	Strongly disagree	Agree
Waikato Region	Strongly disagree	Disagree	Strongly disagree	Unsure/neutral	Disagree	Strongly disagree	Agree	Strongly disagree	Disagree	Disagree	Unsure/neutral	Agree	Unsure/neutral	Strongly disagree	Strongly agree	Agree	Disagree	Disagree	Agree	Strongly agree	Agree	Strongly agree	Strongly agree	Strongly agree	Strongly agree	Agree	Agree	Agree	Agree	Agree	Strongly agree	Agree	Agree	Agree	Agree	Strongly agree	Agree	Strongly agree	Agree	Agree	Strongly agree	Agree	Agree	Strongly agree	Agree	Strongly agree	Strongly agree	Strongly disagree	Strongly agree
Canterbury Region	Strongly disagree	Strongly disagree	Strongly disagree	Strongly disagree	Disagree	Disagree	Strongly agree	Strongly disagree	Unsure/neutral	Agree	Agree	Agree	Disagree	Strongly disagree	Agree	Agree	Disagree	Unsure/neutral	Disagree	Agree	Strongly agree	Agree	Strongly agree	Strongly agree	Strongly agree	Agree	Agree	Unsure/neutral	Strongly agree	Agree	Strongly agree	Unsure/neutral	Agree	Agree	Unsure/neutral	Agree	Unsure/neutral	Agree	Agree	Unsure/neutral	Agree	Unsure/neutral	Agree	Agree	Disagree	Agree	Agree	Strongly disagree	Agree
Waikato Region	Strongly disagree	Unsure/neutral	Strongly disagree	Strongly disagree	Strongly disagree	Strongly disagree	Strongly agree	Strongly disagree	Strongly disagree	Strongly disagree	Unsure/neutral	Disagree	Strongly agree	Strongly disagree	Agree	Agree	Strongly disagree	Disagree	Strongly disagree	Strongly agree	Strongly agree	Strongly agree	Strongly agree	Strongly agree	Strongly agree	Strongly agree	Strongly agree	Strongly agree	Unsure/neutral	Strongly agree	Strongly agree	Agree	Strongly agree	Strongly agree	Agree	Strongly agree	Agree	Strongly agree	Agree	Strongly agree	Strongly agree	Strongly agree	Agree	Strongly agree	Strongly disagree	Strongly agree	Strongly agree	Strongly disagree	Strongly agree
Auckland Region	Strongly disagree	Disagree	Disagree	Disagree	Disagree	Disagree	Agree	Disagree	Unsure/neutral	Disagree	Agree	Agree	Agree	Disagree	Agree	Agree	Unsure/neutral	Disagree	Disagree	Agree	Agree	Agree	Agree	Agree	Agree	Agree	Agree	Agree	Agree	Unsure/neutral	Agree	Agree	Unsure/neutral	Agree	Agree	Agree	Unsure/neutral	Agree	Unsure/neutral	Agree	Agree	Disagree	Agree	Agree	Disagree	Agree	Agree	Disagree	Agree
Northland Region	Disagree	Disagree	Unsure/neutral	Agree	Unsure/neutral	Disagree	Unsure/neutral	Unsure/neutral	Unsure/neutral	Strongly agree	Disagree	Unsure/neutral	Agree	Disagree	Disagree	Unsure/neutral	Agree	Unsure/neutral	Agree	Agree	Unsure/neutral	Unsure/neutral	Unsure/neutral	Disagree	Disagree	Disagree	Disagree	Disagree	Disagree	Unsure/neutral	Unsure/neutral	Agree	Disagree	Unsure/neutral	Disagree	Disagree	Unsure/neutral	Disagree	Unsure/neutral	Unsure/neutral	Disagree	Disagree	Disagree	Disagree	Disagree	Disagree	Disagree	Disagree	Disagree
Hawke's Bay Region	Agree	Agree	Agree	Agree	Agree	Agree	Agree	Agree	Agree	Agree	Agree	Agree	Agree	Agree	Agree	Agree	Agree	Agree	Agree	Agree	Agree	Agree	Agree	Agree	Agree	Agree	Agree	Agree	Agree	Agree	Agree	Agree	Agree	Agree	Agree	Agree	Agree	Agree	Agree	Agree	Agree	Agree	Agree	Agree	Agree	Unsure/neutral	Agree	Agree	Agree
Bay of Plenty Region	Strongly disagree	Strongly disagree	Strongly disagree	Unsure/neutral	Strongly disagree	Strongly disagree	Strongly agree	Strongly disagree	Strongly disagree	Strongly disagree	Strongly agree	Strongly agree	Agree	Strongly disagree	Agree	Strongly agree	Strongly agree	Agree	Strongly agree	Strongly agree	Strongly agree	Strongly agree	Strongly agree	Strongly agree	Strongly agree	Strongly agree	Agree	Strongly agree	Strongly agree	Strongly agree	Strongly agree	Agree	Disagree	Strongly agree	Agree	Strongly agree	Agree	Strongly agree	Strongly agree	Agree	Strongly agree	Strongly disagree	Strongly agree	Strongly agree	Strongly disagree	Strongly agree	Strongly agree	Strongly disagree	Strongly agree
Manawatu-Whanganui Region	Strongly disagree	Disagree	Strongly disagree	Disagree	Strongly disagree	Strongly agree	Agree	Strongly disagree	Strongly agree	Disagree	Strongly agree	Strongly agree	Strongly agree	Disagree	Agree	Agree	Unsure/neutral	Unsure/neutral	Strongly agree	Agree	Strongly agree	Strongly agree	Strongly agree	Strongly agree	Strongly agree	Agree	Strongly agree	Agree	Unsure/neutral	Agree	Strongly agree	Disagree	Agree	Strongly agree	Disagree	Agree	Agree	Agree	Agree	Strongly agree	Agree	Strongly disagree	Strongly agree	Agree	Disagree	Strongly agree	Strongly agree	Disagree	Strongly agree
Auckland Region	Strongly disagree	Disagree	Strongly disagree	Unsure/neutral	Disagree	Disagree	Agree	Disagree	Agree	Disagree	Agree	Unsure/neutral	Agree	Strongly disagree	Agree	Agree	Disagree	Disagree	Agree	Strongly agree	Strongly agree	Strongly agree	Agree	Agree	Agree	Agree	Agree	Agree	Agree	Agree	Agree	Strongly agree	Agree	Agree	Strongly agree	Unsure/neutral	Agree	Agree	Agree	Agree	Agree	Disagree	Agree	Agree	Disagree	Strongly agree	Strongly agree	Disagree	Agree
Canterbury Region	Strongly disagree	Strongly disagree	Strongly disagree	Strongly disagree	Strongly disagree	Disagree	Strongly agree	Strongly disagree	Agree	Unsure/neutral	Agree	Unsure/neutral	Agree	Strongly disagree	Strongly agree	Agree	Agree	Agree	Agree	Strongly agree	Agree	Agree	Agree	Agree	Agree	Agree	Agree	Unsure/neutral	Agree	Agree	Agree	Agree	Agree	Unsure/neutral	Agree	Agree	Agree	Agree	Agree	Strongly agree	Strongly agree	Agree	Strongly agree	Strongly agree	Disagree	Strongly agree	Strongly agree	Strongly disagree	Strongly agree
Waikato Region	Strongly disagree	Disagree	Strongly disagree	Disagree	Disagree	Strongly disagree	Strongly agree	Disagree	Agree	Disagree	Agree	Agree	Agree	Disagree	Agree	Agree	Unsure/neutral	Unsure/neutral	Unsure/neutral	Agree	Agree	Agree	Agree	Strongly agree	Agree	Agree	Agree	Agree	Agree	Agree	Agree	Agree	Agree	Agree	Agree	Agree	Unsure/neutral	Agree	Agree	Agree	Agree	Agree	Agree	Agree	Agree	Agree	Agree	Strongly disagree	Agree
Waikato Region	Strongly disagree	Strongly disagree	Strongly disagree	Agree	Strongly disagree	Strongly disagree	Agree	Strongly disagree	Unsure/neutral	Unsure/neutral	Agree	Agree	Strongly agree	Strongly disagree	Strongly agree	Strongly agree	Unsure/neutral	Disagree	Agree	Strongly agree	Agree	Agree	Agree	Agree	Agree	Unsure/neutral	Agree	Agree	Agree	Agree	Agree	Unsure/neutral	Unsure/neutral	Unsure/neutral	Unsure/neutral	Unsure/neutral	Unsure/neutral	Agree	Unsure/neutral	Agree	Unsure/neutral	Unsure/neutral	Agree	Agree	Unsure/neutral	Agree	Agree	Disagree	Agree
Otago Region	Disagree	Unsure/neutral	Disagree	Agree	Disagree	Disagree	Agree	Disagree	Unsure/neutral	Unsure/neutral	Disagree	Unsure/neutral	Unsure/neutral	Strongly disagree	Unsure/neutral	Agree	Agree	Disagree	Disagree	Agree	Agree	Unsure/neutral	Unsure/neutral	Unsure/neutral	Unsure/neutral	Unsure/neutral	Unsure/neutral	Disagree	Disagree	Disagree	Unsure/neutral	Agree	Disagree	Unsure/neutral	Unsure/neutral	Disagree	Disagree	Disagree	Unsure/neutral	Disagree	Unsure/neutral	Unsure/neutral	Disagree	Disagree	Agree	Unsure/neutral	Unsure/neutral	Unsure/neutral	Unsure/neutral
Waikato Region	Strongly disagree	Strongly disagree	Strongly disagree	Disagree	Strongly disagree	Strongly disagree	Strongly agree	Strongly disagree	Strongly agree	Strongly disagree	Strongly agree	Unsure/neutral	Agree	Strongly disagree	Agree	Agree	Unsure/neutral	Disagree	Strongly agree	Strongly agree	Agree	Agree	Agree	Strongly agree	Agree	Agree	Agree	Agree	Strongly agree	Agree	Agree	Agree	Agree	Agree	Unsure/neutral	Strongly agree	Agree	Strongly agree	Strongly agree	Agree	Strongly agree	Strongly disagree	Strongly agree	Strongly agree	Strongly disagree	Strongly agree	Strongly agree	Strongly disagree	Strongly agree
Auckland Region	Strongly disagree	Disagree	Strongly disagree	Disagree	Strongly disagree	Strongly disagree	Agree	Strongly disagree	Disagree	Strongly disagree	Unsure/neutral	Unsure/neutral	Unsure/neutral	Strongly disagree	Strongly agree	Agree	Strongly disagree	Strongly disagree	Disagree	Strongly agree	Agree	Agree	Strongly agree	Strongly agree	Strongly agree	Agree	Unsure/neutral	Agree	Unsure/neutral	Agree	Agree	Unsure/neutral	Strongly agree	Agree	Unsure/neutral	Agree	Disagree	Agree	Unsure/neutral	Strongly agree	Agree	Strongly disagree	Strongly agree	Strongly agree	Strongly disagree	Strongly agree	Strongly agree	Strongly disagree	Strongly agree
Tasman/ Nelson Region	Strongly disagree	Strongly disagree	Strongly disagree	Strongly disagree	Strongly disagree	Strongly disagree	Agree	Strongly disagree	Unsure/neutral	Strongly disagree	Unsure/neutral	Strongly agree	Strongly agree	Strongly disagree	Strongly agree	Agree	Strongly disagree	Strongly disagree	Disagree	Strongly agree	Strongly agree	Strongly agree	Strongly agree	Strongly agree	Strongly agree	Strongly agree	Strongly agree	Strongly agree	Unsure/neutral	Strongly agree	Strongly agree	Unsure/neutral	Strongly agree	Strongly agree	Unsure/neutral	Strongly agree	Unsure/neutral	Strongly agree	Unsure/neutral	Strongly agree	Strongly agree	Strongly agree	Strongly agree	Strongly agree	Strongly disagree	Strongly agree	Strongly agree	Strongly disagree	Strongly agree
Auckland Region	Strongly disagree	Strongly disagree	Strongly disagree	Agree	Strongly disagree	Disagree	Strongly agree	Strongly disagree	Agree	Disagree	Agree	Agree	Unsure/neutral	Strongly disagree	Agree	Agree	Unsure/neutral	Disagree	Strongly agree	Agree	Agree	Agree	Agree	Strongly agree	Agree	Agree	Agree	Unsure/neutral	Strongly disagree	Unsure/neutral	Agree	Unsure/neutral	Strongly agree	Agree	Unsure/neutral	Agree	Unsure/neutral	Unsure/neutral	Unsure/neutral	Agree	Agree	Disagree	Agree	Agree	Disagree	Agree	Agree	Strongly disagree	Agree
Auckland Region	Strongly disagree	Unsure/neutral	Strongly disagree	Unsure/neutral	Disagree	Disagree	Strongly agree	Disagree	Strongly agree	Disagree	Disagree	Unsure/neutral	Unsure/neutral	Strongly disagree	Unsure/neutral	Disagree	Unsure/neutral	Strongly agree	Strongly agree	Agree	Agree	Strongly agree	Agree	Agree	Agree	Unsure/neutral	Agree	Disagree	Unsure/neutral	Unsure/neutral	Agree	Strongly agree	Unsure/neutral	Unsure/neutral	Unsure/neutral	Agree	Agree	Unsure/neutral	Agree	Unsure/neutral	Agree	Disagree	Unsure/neutral	Agree	Disagree	Agree	Agree	Disagree	Agree
Bay of Plenty Region	Strongly agree	Strongly agree	Strongly agree	Strongly agree	Strongly agree	Agree	Strongly disagree	Strongly agree	Strongly disagree	Strongly agree	Disagree	Strongly disagree	Strongly disagree	Strongly disagree	Strongly disagree	Disagree	Strongly agree	Strongly agree	Strongly agree	Disagree	Unsure/neutral	Agree	Unsure/neutral	Unsure/neutral	Disagree	Disagree	Disagree	Disagree	Disagree	Agree	Disagree	Unsure/neutral	Agree	Disagree	Disagree	Strongly disagree	Strongly disagree	Strongly disagree	Agree	Agree	Strongly disagree	Strongly disagree	Strongly agree	Strongly disagree	Strongly disagree	Strongly disagree	Strongly disagree	Strongly agree	Strongly disagree
Northland Region	Strongly disagree	Disagree	Strongly disagree	Disagree	Strongly disagree	Disagree	Agree	Disagree	Agree	Strongly disagree	Strongly agree	Agree	Agree	Strongly disagree	Unsure/neutral	Unsure/neutral	Agree	Unsure/neutral	Agree	Unsure/neutral	Unsure/neutral	Agree	Agree	Strongly agree	Agree	Agree	Unsure/neutral	Unsure/neutral	Agree	Disagree	Unsure/neutral	Agree	Disagree	Agree	Strongly agree	Unsure/neutral	Agree	Unsure/neutral	Unsure/neutral	Strongly disagree	Agree	Disagree	Disagree	Agree	Disagree	Agree	Agree	Disagree	Agree
Auckland Region	Strongly disagree	Disagree	Disagree	Agree	Disagree	Disagree	Agree	Strongly disagree	Agree	Strongly agree	Agree	Agree	Unsure/neutral	Strongly disagree	Unsure/neutral	Agree	Agree	Agree	Agree	Agree	Unsure/neutral	Agree	Agree	Unsure/neutral	Agree	Disagree	Unsure/neutral	Strongly disagree	Disagree	Agree	Disagree	Agree	Agree	Disagree	Unsure/neutral	Disagree	Disagree	Disagree	Unsure/neutral	Agree	Disagree	Disagree	Agree	Strongly disagree	Disagree	Unsure/neutral	Agree	Unsure/neutral	Agree
Southland Region	Strongly disagree	Disagree	Strongly disagree	Disagree	Strongly disagree	Strongly disagree	Agree	Strongly disagree	Agree	Strongly disagree	Strongly agree	Agree	Strongly agree	Strongly disagree	Strongly agree	Agree	Disagree	Strongly disagree	Agree	Strongly agree	Agree	Agree	Agree	Agree	Agree	Disagree	Strongly agree	Agree	Agree	Agree	Agree	Agree	Agree	Agree	Strongly agree	Disagree	Unsure/neutral	Unsure/neutral	Agree	Agree	Agree	Disagree	Agree	Agree	Agree	Agree	Agree	Strongly disagree	Agree
Waikato Region	Strongly disagree	Unsure/neutral	Unsure/neutral	Agree	Disagree	Disagree	Agree	Disagree	Agree	Strongly disagree	Agree	Agree	Agree	Disagree	Strongly agree	Agree	Disagree	Unsure/neutral	Disagree	Agree	Strongly agree	Strongly agree	Agree	Strongly agree	Strongly agree	Agree	Strongly agree	Agree	Strongly agree	Strongly agree	Strongly agree	Disagree	Agree	Agree	Agree	Strongly disagree	Strongly agree	Strongly agree	Agree	Strongly agree	Agree	Strongly agree	Strongly agree	Agree	Strongly agree	Unsure/neutral	Unsure/neutral	Disagree	Unsure/neutral
Bay of Plenty Region	Strongly disagree	Unsure/neutral	Strongly disagree	Strongly disagree	Strongly disagree	Strongly disagree	Strongly agree	Strongly disagree	Disagree	Strongly disagree	Strongly agree	Agree	Agree	Disagree	Agree	Agree	Disagree	Disagree	Agree	Strongly agree	Strongly agree	Strongly agree	Strongly agree	Strongly agree	Strongly agree	Strongly agree	Strongly agree	Strongly agree	Unsure/neutral	Strongly agree	Strongly agree	Strongly agree	Agree	Strongly agree	Agree	Strongly agree	Agree	Strongly agree	Strongly agree	Strongly agree	Strongly agree	Disagree	Strongly agree	Strongly agree	Strongly disagree	Strongly agree	Strongly agree	Strongly disagree	Strongly agree
Auckland Region	Strongly disagree	Strongly disagree	Strongly disagree	Strongly disagree	Strongly disagree	Strongly disagree	Agree	Strongly disagree	Agree	Strongly disagree	Disagree	Strongly agree	Strongly agree	Strongly disagree	Strongly agree	Strongly agree	Strongly agree	Strongly disagree	Strongly agree	Strongly agree	Strongly agree	Strongly agree	Strongly agree	Strongly agree	Strongly agree	Agree	Strongly agree	Agree	Strongly agree	Strongly agree	Strongly agree	Strongly agree	Strongly agree	Agree	Agree	Strongly agree	Agree	Strongly agree	Agree	Strongly agree	Strongly agree	Disagree	Strongly agree	Strongly agree	Disagree	Strongly agree	Strongly agree	Strongly disagree	Strongly agree
Tasman/ Nelson Region	Strongly disagree	Strongly disagree	Strongly disagree	Disagree	Strongly disagree	Disagree	Agree	Strongly disagree	Agree	Disagree	Agree	Agree	Agree	Strongly disagree	Agree	Agree	Disagree	Disagree	Agree	Unsure/neutral	Agree	Strongly agree	Strongly agree	Strongly agree	Strongly agree	Disagree	Unsure/neutral	Unsure/neutral	Disagree	Disagree	Unsure/neutral	Strongly agree	Agree	Unsure/neutral	Agree	Agree	Disagree	Disagree	Unsure/neutral	Agree	Agree	Agree	Agree	Agree	Agree	Agree	Agree	Strongly disagree	Agree
Bay of Plenty Region	Strongly disagree	Strongly disagree	Strongly disagree	Strongly disagree	Strongly disagree	Strongly disagree	Strongly agree	Strongly disagree	Agree	Strongly disagree	Agree	Agree	Strongly agree	Strongly disagree	Strongly agree	Strongly agree	Strongly disagree	Strongly disagree	Agree	Strongly agree	Strongly agree	Strongly agree	Strongly agree	Strongly agree	Strongly agree	Strongly agree	Strongly agree	Strongly agree	Agree	Agree	Strongly agree	Agree	Agree	Strongly agree	Agree	Agree	Agree	Strongly agree	Agree	Strongly agree	Strongly agree	Strongly agree	Strongly agree	Strongly agree	Agree	Strongly agree	Strongly agree	Strongly disagree	Strongly agree
Manawatu-Whanganui Region	Strongly disagree	Agree	Strongly disagree	Agree	Disagree	Unsure/neutral	Agree	Disagree	Disagree	Unsure/neutral	Unsure/neutral	Agree	Agree	Disagree	Unsure/neutral	Unsure/neutral	Agree	Strongly agree	Strongly agree	Unsure/neutral	Unsure/neutral	Unsure/neutral	Disagree	Unsure/neutral	Unsure/neutral	Unsure/neutral	Unsure/neutral	Strongly disagree	Unsure/neutral	Unsure/neutral	Unsure/neutral	Unsure/neutral	Agree	Disagree	Strongly disagree	Unsure/neutral	Unsure/neutral	Unsure/neutral	Unsure/neutral	Unsure/neutral	Unsure/neutral	Strongly disagree	Agree	Disagree	Strongly disagree	Disagree	Agree	Disagree	Agree
Canterbury Region	Disagree	Disagree	Strongly disagree	Disagree	Disagree	Disagree	Agree	Disagree	Disagree	Disagree	Agree	Unsure/neutral	Agree	Disagree	Strongly agree	Agree	Unsure/neutral	Agree	Unsure/neutral	Agree	Agree	Agree	Agree	Agree	Agree	Agree	Agree	Agree	Unsure/neutral	Agree	Agree	Agree	Agree	Agree	Agree	Strongly agree	Agree	Strongly agree	Agree	Strongly agree	Strongly agree	Agree	Strongly agree	Strongly agree	Agree	Strongly agree	Strongly agree	Disagree	Agree
Tasman/ Nelson Region	Strongly disagree	Disagree	Strongly disagree	Strongly disagree	Disagree	Strongly disagree	Agree	Disagree	Agree	Strongly disagree	Strongly agree	Strongly agree	Agree	Strongly disagree	Agree	Agree	Unsure/neutral	Agree	Agree	Agree	Agree	Agree	Agree	Strongly agree	Agree	Strongly agree	Strongly agree	Unsure/neutral	Agree	Agree	Strongly agree	Agree	Agree	Agree	Strongly agree	Agree	Unsure/neutral	Unsure/neutral	Unsure/neutral	Agree	Strongly agree	Disagree	Strongly agree	Strongly agree	Disagree	Strongly agree	Strongly agree	Strongly disagree	Strongly agree
Otago Region	Disagree	Unsure/neutral	Unsure/neutral	Agree	Unsure/neutral	Unsure/neutral	Agree	Unsure/neutral	Unsure/neutral	Disagree	Disagree	Strongly disagree	Disagree	Strongly disagree	Disagree	Disagree	Agree	Strongly agree	Strongly agree	Disagree	Disagree	Strongly disagree	Strongly disagree	Strongly disagree	Strongly disagree	Disagree	Disagree	Strongly disagree	Agree	Unsure/neutral	Disagree	Strongly disagree	Unsure/neutral	Strongly disagree	Unsure/neutral	Unsure/neutral	Disagree	Disagree	Disagree	Unsure/neutral	Disagree	Disagree	Unsure/neutral	Disagree	Disagree	Disagree	Unsure/neutral	Agree	Disagree
Bay of Plenty Region	Strongly disagree	Disagree	Strongly disagree	Unsure/neutral	Strongly disagree	Agree	Strongly agree	Unsure/neutral	Disagree	Agree	Disagree	Unsure/neutral	Agree	Strongly disagree	Strongly agree	Strongly agree	Agree	Unsure/neutral	Strongly agree	Agree	Agree	Unsure/neutral	Agree	Agree	Agree	Agree	Unsure/neutral	Unsure/neutral	Agree	Agree	Unsure/neutral	Agree	Agree	Disagree	Agree	Agree	Unsure/neutral	Agree	Unsure/neutral	Strongly agree	Agree	Disagree	Strongly agree	Unsure/neutral	Disagree	Agree	Agree	Disagree	Agree
Auckland Region	Strongly disagree	Disagree	Strongly disagree	Disagree	Strongly disagree	Strongly disagree	Strongly agree	Strongly disagree	Disagree	Disagree	Unsure/neutral	Agree	Agree	Strongly disagree	Agree	Agree	Agree	Agree	Agree	Disagree	Agree	Agree	Agree	Agree	Agree	Disagree	Disagree	Disagree	Strongly disagree	Disagree	Disagree	Agree	Disagree	Disagree	Agree	Disagree	Disagree	Agree	Disagree	Agree	Agree	Strongly disagree	Disagree	Agree	Disagree	Agree	Agree	Strongly disagree	Agree
Wellington Region	Disagree	Disagree	Disagree	Unsure/neutral	Disagree	Disagree	Unsure/neutral	Disagree	Disagree	Unsure/neutral	Unsure/neutral	Unsure/neutral	Agree	Disagree	Unsure/neutral	Unsure/neutral	Agree	Agree	Agree	Agree	Unsure/neutral	Agree	Unsure/neutral	Agree	Agree	Disagree	Disagree	Disagree	Unsure/neutral	Unsure/neutral	Disagree	Disagree	Agree	Unsure/neutral	Unsure/neutral	Disagree	Unsure/neutral	Disagree	Unsure/neutral	Unsure/neutral	Disagree	Unsure/neutral	Unsure/neutral	Strongly disagree	Unsure/neutral	Unsure/neutral	Agree	Unsure/neutral	Unsure/neutral
Manawatu-Whanganui Region	Strongly disagree	Disagree	Strongly disagree	Unsure/neutral	Strongly disagree	Disagree	Strongly agree	Strongly disagree	Agree	Disagree	Unsure/neutral	Unsure/neutral	Unsure/neutral	Strongly disagree	Agree	Agree	Unsure/neutral	Disagree	Agree	Agree	Agree	Agree	Agree	Agree	Agree	Agree	Unsure/neutral	Unsure/neutral	Agree	Agree	Agree	Strongly agree	Agree	Unsure/neutral	Agree	Agree	Agree	Agree	Agree	Agree	Agree	Agree	Agree	Agree	Agree	Agree	Agree	Disagree	Agree
Wellington Region	Strongly disagree	Disagree	Strongly disagree	Disagree	Strongly disagree	Disagree	Strongly agree	Strongly disagree	Agree	Strongly disagree	Strongly agree	Agree	Agree	Strongly disagree	Strongly agree	Strongly agree	Disagree	Disagree	Unsure/neutral	Strongly agree	Strongly agree	Strongly agree	Strongly agree	Strongly agree	Strongly agree	Strongly agree	Strongly agree	Strongly agree	Agree	Unsure/neutral	Strongly agree	Strongly agree	Unsure/neutral	Strongly agree	Strongly agree	Strongly agree	Agree	Strongly agree	Agree	Unsure/neutral	Strongly agree	Strongly agree	Unsure/neutral	Strongly agree	Disagree	Strongly agree	Strongly agree	Strongly disagree	Strongly agree
Canterbury Region	Strongly disagree	Disagree	Strongly disagree	Unsure/neutral	Disagree	Disagree	Strongly agree	Strongly disagree	Agree	Unsure/neutral	Disagree	Agree	Agree	Strongly disagree	Unsure/neutral	Agree	Unsure/neutral	Unsure/neutral	Agree	Unsure/neutral	Agree	Agree	Agree	Agree	Agree	Unsure/neutral	Unsure/neutral	Unsure/neutral	Unsure/neutral	Agree	Agree	Unsure/neutral	Agree	Agree	Disagree	Unsure/neutral	Unsure/neutral	Unsure/neutral	Unsure/neutral	Agree	Agree	Disagree	Agree	Agree	Disagree	Agree	Agree	Disagree	Agree
Auckland Region	Strongly disagree	Unsure/neutral	Strongly disagree	Agree	Strongly disagree	Strongly disagree	Strongly agree	Strongly disagree	Agree	Unsure/neutral	Agree	Strongly agree	Strongly agree	Strongly disagree	Disagree	Disagree	Agree	Agree	Strongly agree	Disagree	Unsure/neutral	Unsure/neutral	Disagree	Unsure/neutral	Unsure/neutral	Disagree	Disagree	Unsure/neutral	Agree	Disagree	Unsure/neutral	Disagree	Unsure/neutral	Unsure/neutral	Disagree	Disagree	Disagree	Unsure/neutral	Disagree	Unsure/neutral	Agree	Disagree	Agree	Disagree	Strongly disagree	Agree	Agree	Disagree	Unsure/neutral
Auckland Region	Strongly disagree	Strongly disagree	Strongly disagree	Disagree	Strongly disagree	Disagree	Strongly agree	Strongly disagree	Agree	Disagree	Agree	Strongly agree	Strongly agree	Strongly disagree	Strongly agree	Strongly agree	Disagree	Strongly disagree	Agree	Strongly agree	Agree	Agree	Unsure/neutral	Agree	Unsure/neutral	Disagree	Agree	Unsure/neutral	Disagree	Strongly agree	Agree	Strongly agree	Strongly agree	Agree	Agree	Strongly agree	Disagree	Strongly agree	Disagree	Strongly agree	Strongly agree	Strongly disagree	Strongly agree	Strongly agree	Strongly disagree	Strongly agree	Strongly agree	Strongly disagree	Strongly agree
Canterbury Region	Strongly disagree	Strongly disagree	Agree	Agree	Disagree	Disagree	Agree	Strongly disagree	Agree	Agree	Agree	Unsure/neutral	Disagree	Strongly disagree	Unsure/neutral	Agree	Unsure/neutral	Disagree	Agree	Agree	Agree	Agree	Agree	Agree	Disagree	Strongly disagree	Agree	Strongly disagree	Unsure/neutral	Strongly disagree	Agree	Unsure/neutral	Strongly disagree	Agree	Agree	Disagree	Unsure/neutral	Disagree	Unsure/neutral	Strongly disagree	Agree	Strongly disagree	Strongly disagree	Strongly agree	Strongly disagree	Strongly agree	Strongly agree	Strongly disagree	Strongly agree
Northland Region	Strongly disagree	Strongly disagree	Strongly disagree	Disagree	Strongly disagree	Agree	Strongly disagree	Strongly disagree	Disagree	Disagree	Unsure/neutral	Disagree	Disagree	Strongly disagree	Agree	Agree	Unsure/neutral	Agree	Agree	Agree	Agree	Agree	Agree	Agree	Agree	Agree	Agree	Unsure/neutral	Strongly agree	Unsure/neutral	Unsure/neutral	Agree	Unsure/neutral	Unsure/neutral	Strongly agree	Unsure/neutral	Agree	Unsure/neutral	Agree	Agree	Agree	Strongly disagree	Unsure/neutral	Agree	Agree	Agree	Agree	Strongly disagree	Agree
Canterbury Region	Strongly disagree	Disagree	Strongly disagree	Agree	Unsure/neutral	Strongly disagree	Strongly agree	Strongly disagree	Disagree	Disagree	Agree	Agree	Agree	Strongly disagree	Agree	Agree	Agree	Disagree	Strongly agree	Agree	Agree	Agree	Agree	Agree	Agree	Unsure/neutral	Agree	Unsure/neutral	Agree	Agree	Agree	Agree	Agree	Unsure/neutral	Agree	Disagree	Agree	Agree	Disagree	Agree	Agree	Agree	Agree	Agree	Agree	Agree	Agree	Disagree	Unsure/neutral
Canterbury Region	Disagree	Disagree	Disagree	Unsure/neutral	Disagree	Disagree	Agree	Strongly disagree	Disagree	Disagree	Agree	Agree	Agree	Disagree	Unsure/neutral	Agree	Agree	Agree	Agree	Agree	Agree	Agree	Agree	Agree	Unsure/neutral	Unsure/neutral	Disagree	Disagree	Unsure/neutral	Unsure/neutral	Unsure/neutral	Unsure/neutral	Unsure/neutral	Disagree	Unsure/neutral	Agree	Unsure/neutral	Unsure/neutral	Disagree	Agree	Agree	Disagree	Agree	Agree	Disagree	Unsure/neutral	Agree	Disagree	Agree
Manawatu-Whanganui Region	Strongly disagree	Agree	Strongly disagree	Unsure/neutral	Strongly disagree	Strongly disagree	Strongly agree	Strongly disagree	Agree	Strongly disagree	Disagree	Strongly agree	Strongly agree	Strongly disagree	Strongly agree	Strongly agree	Disagree	Agree	Unsure/neutral	Strongly agree	Agree	Agree	Agree	Agree	Agree	Agree	Agree	Agree	Agree	Agree	Agree	Disagree	Agree	Agree	Unsure/neutral	Agree	Agree	Agree	Agree	Strongly agree	Agree	Strongly agree	Agree	Agree	Strongly agree	Agree	Agree	Agree	Agree
Auckland Region	Unsure/neutral	Unsure/neutral	Unsure/neutral	Disagree	Agree	Unsure/neutral	Unsure/neutral	Disagree	Agree	Agree	Agree	Agree	Agree	Agree	Agree	Unsure/neutral	Disagree	Unsure/neutral	Unsure/neutral	Unsure/neutral	Agree	Unsure/neutral	Agree	Unsure/neutral	Agree	Agree	Unsure/neutral	Agree	Unsure/neutral	Unsure/neutral	Unsure/neutral	Agree	Unsure/neutral	Unsure/neutral	Unsure/neutral	Disagree	Disagree	Disagree	Unsure/neutral	Unsure/neutral	Unsure/neutral	Strongly disagree	Agree	Agree	Strongly agree	Strongly disagree	Unsure/neutral	Strongly disagree	Disagree
Auckland Region	Strongly disagree	Strongly disagree	Strongly disagree	Strongly disagree	Unsure/neutral	Strongly disagree	Strongly agree	Strongly disagree	Unsure/neutral	Strongly disagree	Strongly disagree	Unsure/neutral	Disagree	Strongly disagree	Strongly agree	Strongly agree	Unsure/neutral	Unsure/neutral	Agree	Strongly agree	Strongly agree	Strongly agree	Strongly agree	Strongly agree	Strongly agree	Strongly agree	Strongly agree	Unsure/neutral	Agree	Strongly agree	Strongly agree	Strongly agree	Strongly agree	Agree	Strongly agree	Strongly agree	Strongly agree	Strongly agree	Strongly agree	Agree	Strongly agree	Strongly agree	Strongly agree	Agree	Agree	Strongly agree	Strongly agree	Strongly disagree	Strongly agree
Tasman/ Nelson Region	Strongly disagree	Disagree	Strongly disagree	Strongly disagree	Strongly disagree	Strongly disagree	Strongly agree	Strongly disagree	Agree	Strongly disagree	Agree	Unsure/neutral	Agree	Strongly disagree	Strongly agree	Agree	Disagree	Disagree	Agree	Strongly agree	Strongly agree	Strongly agree	Strongly agree	Strongly agree	Strongly agree	Agree	Agree	Strongly agree	Agree	Agree	Strongly agree	Agree	Agree	Strongly agree	Agree	Agree	Agree	Strongly agree	Strongly agree	Agree	Strongly agree	Disagree	Agree	Strongly agree	Disagree	Strongly agree	Strongly agree	Strongly disagree	Strongly agree
Canterbury Region	Strongly disagree	Strongly disagree	Strongly disagree	Strongly disagree	Strongly disagree	Strongly disagree	Strongly agree	Strongly disagree	Strongly agree	Unsure/neutral	Strongly agree	Strongly agree	Strongly agree	Strongly disagree	Strongly agree	Strongly agree	Unsure/neutral	Strongly agree	Strongly agree	Strongly agree	Strongly agree	Strongly agree	Strongly agree	Strongly agree	Strongly agree	Strongly agree	Strongly agree	Strongly agree	Strongly agree	Unsure/neutral	Strongly agree	Strongly agree	Strongly agree	Strongly agree	Agree	Strongly agree	Unsure/neutral	Strongly agree	Strongly agree	Strongly agree	Strongly agree	Disagree	Strongly agree	Strongly agree	Strongly disagree	Strongly agree	Strongly agree	Strongly disagree	Strongly agree
Wellington Region	Disagree	Unsure/neutral	Strongly disagree	Strongly disagree	Strongly disagree	Strongly disagree	Agree	Strongly disagree	Strongly agree	Strongly disagree	Unsure/neutral	Unsure/neutral	Agree	Disagree	Strongly agree	Unsure/neutral	Strongly disagree	Unsure/neutral	Strongly agree	Agree	Agree	Agree	Agree	Agree	Agree	Strongly disagree	Strongly agree	Unsure/neutral	Strongly agree	Unsure/neutral	Agree	Disagree	Unsure/neutral	Agree	Unsure/neutral	Unsure/neutral	Unsure/neutral	Unsure/neutral	Agree	Unsure/neutral	Unsure/neutral	Unsure/neutral	Unsure/neutral	Agree	Unsure/neutral	Unsure/neutral	Agree	Unsure/neutral	Disagree
Tasman/ Nelson Region	Strongly disagree	Disagree	Strongly disagree	Disagree	Disagree	Disagree	Strongly agree	Disagree	Strongly disagree	Disagree	Unsure/neutral	Unsure/neutral	Agree	Strongly disagree	Strongly agree	Strongly agree	Unsure/neutral	Disagree	Strongly agree	Strongly agree	Strongly agree	Strongly agree	Strongly agree	Strongly agree	Strongly agree	Agree	Strongly agree	Agree	Agree	Agree	Agree	Strongly agree	Agree	Agree	Agree	Agree	Agree	Agree	Agree	Agree	Agree	Agree	Agree	Agree	Agree	Agree	Agree	Strongly disagree	Agree
Waikato Region	Disagree	Disagree	Disagree	Disagree	Disagree	Disagree	Unsure/neutral	Disagree	Disagree	Disagree	Unsure/neutral	Agree	Agree	Agree	Agree	Agree	Unsure/neutral	Unsure/neutral	Agree	Agree	Agree	Agree	Agree	Agree	Unsure/neutral	Unsure/neutral	Unsure/neutral	Unsure/neutral	Unsure/neutral	Unsure/neutral	Agree	Agree	Unsure/neutral	Unsure/neutral	Disagree	Unsure/neutral	Unsure/neutral	Unsure/neutral	Unsure/neutral	Unsure/neutral	Agree	Disagree	Unsure/neutral	Unsure/neutral	Disagree	Agree	Agree	Disagree	Agree
Otago Region	Disagree	Disagree	Strongly disagree	Unsure/neutral	Disagree	Disagree	Agree	Disagree	Agree	Disagree	Agree	Agree	Strongly agree	Strongly disagree	Strongly agree	Unsure/neutral	Disagree	Disagree	Disagree	Strongly agree	Agree	Agree	Agree	Agree	Agree	Unsure/neutral	Agree	Unsure/neutral	Disagree	Agree	Agree	Agree	Agree	Agree	Agree	Unsure/neutral	Disagree	Agree	Unsure/neutral	Agree	Agree	Disagree	Agree	Agree	Agree	Strongly agree	Strongly agree	Strongly disagree	Strongly agree
Waikato Region	Strongly disagree	Strongly disagree	Strongly disagree	Disagree	Strongly disagree	Strongly disagree	Agree	Strongly disagree	Unsure/neutral	Disagree	Agree	Strongly agree	Strongly agree	Strongly disagree	Strongly agree	Agree	Disagree	Disagree	Agree	Strongly agree	Agree	Agree	Agree	Strongly agree	Agree	Agree	Strongly agree	Agree	Disagree	Agree	Strongly agree	Agree	Agree	Agree	Agree	Unsure/neutral	Disagree	Agree	Disagree	Agree	Agree	Disagree	Agree	Agree	Disagree	Strongly agree	Strongly agree	Strongly disagree	Strongly agree
Auckland Region	Agree	Agree	Agree	Unsure/neutral	Agree	Agree	Unsure/neutral	Unsure/neutral	Agree	Unsure/neutral	Disagree	Agree	Unsure/neutral	Agree	Unsure/neutral	Unsure/neutral	Agree	Agree	Agree	Agree	Agree	Agree	Agree	Agree	Agree	Unsure/neutral	Agree	Agree	Agree	Agree	Agree	Unsure/neutral	Agree	Unsure/neutral	Agree	Agree	Agree	Strongly agree	Agree	Agree	Agree	Agree	Strongly agree	Agree	Strongly agree	Agree	Agree	Agree	Unsure/neutral
Manawatu-Whanganui Region	Disagree	Strongly disagree	Unsure/neutral	Strongly agree	Unsure/neutral	Strongly agree	Disagree	Agree	Unsure/neutral	Strongly agree	Strongly agree	Strongly disagree	Strongly agree	Strongly disagree	Strongly disagree	Strongly disagree	Strongly agree	Agree	Strongly agree	Strongly disagree	Strongly disagree	Strongly disagree	Strongly disagree	Strongly disagree	Disagree	Strongly disagree	Strongly disagree	Strongly disagree	Strongly disagree	Strongly disagree	Strongly disagree	Strongly agree	Strongly disagree	Strongly disagree	Strongly agree	Strongly disagree	Strongly disagree	Strongly disagree	Strongly disagree	Strongly disagree	Strongly disagree	Strongly agree	Strongly disagree	Strongly disagree	Strongly agree	Strongly disagree	Strongly disagree	Strongly agree	Strongly disagree
Auckland Region	Strongly disagree	Disagree	Strongly disagree	Disagree	Disagree	Disagree	Agree	Disagree	Agree	Disagree	Agree	Unsure/neutral	Unsure/neutral	Disagree	Agree	Agree	Disagree	Disagree	Agree	Agree	Agree	Agree	Agree	Agree	Agree	Unsure/neutral	Agree	Unsure/neutral	Agree	Agree	Agree	Agree	Unsure/neutral	Agree	Agree	Agree	Agree	Unsure/neutral	Agree	Agree	Agree	Disagree	Unsure/neutral	Agree	Disagree	Agree	Agree	Disagree	Agree
Otago Region	Strongly disagree	Unsure/neutral	Strongly disagree	Agree	Disagree	Strongly disagree	Strongly agree	Strongly disagree	Agree	Disagree	Agree	Unsure/neutral	Agree	Strongly disagree	Strongly agree	Agree	Disagree	Unsure/neutral	Unsure/neutral	Strongly agree	Strongly agree	Unsure/neutral	Agree	Strongly agree	Agree	Agree	Strongly agree	Agree	Strongly agree	Strongly agree	Strongly agree	Strongly agree	Strongly agree	Agree	Strongly agree	Strongly agree	Unsure/neutral	Strongly agree	Agree	Strongly agree	Strongly agree	Agree	Strongly agree	Strongly agree	Agree	Strongly agree	Strongly agree	Strongly disagree	Strongly agree
Auckland Region	Strongly disagree	Strongly disagree	Strongly disagree	Agree	Strongly disagree	Strongly disagree	Agree	Disagree	Agree	Agree	Agree	Strongly agree	Strongly agree	Strongly disagree	Strongly agree	Strongly agree	Strongly disagree	Strongly disagree	Agree	Strongly agree	Strongly agree	Agree	Agree	Strongly agree	Agree	Agree	Agree	Agree	Strongly agree	Agree	Agree	Strongly disagree	Agree	Agree	Strongly disagree	Agree	Disagree	Agree	Disagree	Agree	Agree	Strongly disagree	Agree	Agree	Strongly disagree	Strongly agree	Agree	Disagree	Agree
Northland Region	Strongly disagree	Strongly disagree	Strongly disagree	Strongly disagree	Strongly disagree	Strongly disagree	Strongly agree	Strongly disagree	Strongly agree	Agree	Strongly agree	Unsure/neutral	Agree	Strongly disagree	Strongly agree	Unsure/neutral	Disagree	Agree	Agree	Strongly agree	Strongly agree	Agree	Agree	Strongly agree	Agree	Unsure/neutral	Strongly agree	Agree	Strongly agree	Unsure/neutral	Strongly agree	Agree	Agree	Strongly agree	Disagree	Unsure/neutral	Agree	Disagree	Unsure/neutral	Agree	Strongly agree	Unsure/neutral	Agree	Agree	Disagree	Agree	Strongly agree	Strongly disagree	Strongly agree
Auckland Region	Strongly disagree	Strongly disagree	Strongly disagree	Strongly disagree	Strongly disagree	Strongly agree	Strongly agree	Strongly disagree	Strongly agree	Strongly disagree	Strongly agree	Unsure/neutral	Unsure/neutral	Strongly disagree	Strongly agree	Strongly agree	Disagree	Unsure/neutral	Strongly agree	Strongly agree	Strongly agree	Strongly agree	Strongly agree	Strongly agree	Strongly agree	Unsure/neutral	Strongly agree	Agree	Strongly agree	Strongly agree	Strongly agree	Strongly agree	Strongly agree	Strongly agree	Unsure/neutral	Unsure/neutral	Agree	Unsure/neutral	Unsure/neutral	Agree	Strongly agree	Strongly agree	Strongly agree	Strongly agree	Strongly agree	Strongly agree	Strongly agree	Strongly disagree	Strongly agree
Wellington Region	Strongly disagree	Strongly disagree	Strongly disagree	Strongly agree	Strongly disagree	Strongly agree	Strongly agree	Strongly disagree	Strongly agree	Disagree	Unsure/neutral	Strongly agree	Strongly agree	Strongly disagree	Disagree	Agree	Strongly agree	Strongly agree	Strongly agree	Agree	Disagree	Disagree	Unsure/neutral	Unsure/neutral	Unsure/neutral	Disagree	Strongly disagree	Strongly disagree	Disagree	Agree	Disagree	Strongly agree	Agree	Strongly disagree	Agree	Strongly disagree	Strongly disagree	Strongly disagree	Strongly disagree	Agree	Strongly disagree	Strongly agree	Agree	Strongly disagree	Agree	Disagree	Unsure/neutral	Unsure/neutral	Unsure/neutral
Manawatu-Whanganui Region	Strongly disagree	Disagree	Strongly disagree	Disagree	Strongly disagree	Strongly disagree	Strongly agree	Strongly disagree	Agree	Strongly disagree	Agree	Agree	Agree	Strongly disagree	Agree	Agree	Unsure/neutral	Disagree	Agree	Agree	Agree	Agree	Agree	Agree	Agree	Agree	Agree	Agree	Agree	Agree	Agree	Agree	Agree	Agree	Agree	Agree	Agree	Agree	Agree	Agree	Strongly agree	Disagree	Agree	Agree	Disagree	Agree	Agree	Strongly disagree	Agree
Canterbury Region	Strongly disagree	Strongly disagree	Strongly disagree	Unsure/neutral	Agree	Strongly disagree	Strongly agree	Strongly disagree	Disagree	Disagree	Strongly disagree	Unsure/neutral	Unsure/neutral	Strongly disagree	Agree	Strongly agree	Agree	Strongly agree	Strongly agree	Strongly agree	Strongly agree	Strongly agree	Strongly agree	Strongly agree	Strongly agree	Unsure/neutral	Unsure/neutral	Strongly disagree	Disagree	Unsure/neutral	Agree	Strongly disagree	Unsure/neutral	Strongly agree	Strongly disagree	Strongly agree	Agree	Strongly agree	Strongly disagree	Unsure/neutral	Strongly agree	Strongly disagree	Strongly disagree	Strongly agree	Strongly disagree	Strongly agree	Strongly agree	Strongly disagree	Strongly agree
Auckland Region	Strongly disagree	Strongly disagree	Strongly disagree	Agree	Strongly disagree	Unsure/neutral	Strongly agree	Strongly disagree	Agree	Unsure/neutral	Agree	Disagree	Agree	Strongly disagree	Unsure/neutral	Disagree	Agree	Strongly agree	Strongly agree	Disagree	Unsure/neutral	Strongly disagree	Unsure/neutral	Disagree	Unsure/neutral	Strongly disagree	Unsure/neutral	Strongly disagree	Agree	Strongly disagree	Strongly disagree	Agree	Strongly disagree	Strongly disagree	Strongly agree	Strongly disagree	Strongly disagree	Strongly disagree	Strongly disagree	Strongly disagree	Strongly disagree	Strongly disagree	Strongly disagree	Strongly disagree	Strongly disagree	Disagree	Disagree	Disagree	Disagree
Auckland Region	Strongly disagree	Disagree	Strongly disagree	Strongly disagree	Strongly disagree	Agree	Strongly agree	Disagree	Strongly agree	Unsure/neutral	Strongly agree	Strongly agree	Strongly agree	Strongly disagree	Strongly agree	Strongly agree	Disagree	Strongly disagree	Strongly agree	Strongly agree	Strongly agree	Strongly agree	Strongly agree	Strongly agree	Strongly agree	Agree	Strongly agree	Agree	Unsure/neutral	Unsure/neutral	Agree	Agree	Strongly agree	Strongly agree	Agree	Agree	Agree	Strongly agree	Strongly agree	Strongly agree	Strongly agree	Agree	Strongly agree	Strongly agree	Strongly agree	Strongly agree	Strongly agree	Strongly agree	Strongly agree
Wellington Region	Strongly disagree	Disagree	Strongly disagree	Disagree	Disagree	Disagree	Unsure/neutral	Disagree	Unsure/neutral	Disagree	Agree	Agree	Agree	Strongly disagree	Agree	Agree	Disagree	Disagree	Agree	Agree	Agree	Strongly agree	Strongly agree	Strongly agree	Strongly agree	Unsure/neutral	Agree	Unsure/neutral	Unsure/neutral	Agree	Agree	Strongly agree	Agree	Agree	Strongly agree	Agree	Strongly agree	Unsure/neutral	Strongly agree	Agree	Unsure/neutral	Agree	Agree	Unsure/neutral	Agree	Agree	Agree	Disagree	Agree
Hawke's Bay Region	Strongly disagree	Disagree	Strongly disagree	Unsure/neutral	Disagree	Agree	Agree	Disagree	Unsure/neutral	Unsure/neutral	Agree	Agree	Strongly agree	Strongly disagree	Agree	Agree	Unsure/neutral	Agree	Agree	Strongly agree	Agree	Agree	Agree	Agree	Agree	Agree	Agree	Unsure/neutral	Agree	Agree	Agree	Agree	Agree	Agree	Agree	Disagree	Agree	Unsure/neutral	Agree	Agree	Agree	Agree	Agree	Agree	Disagree	Agree	Agree	Disagree	Agree
Wellington Region	Strongly disagree	Strongly disagree	Strongly disagree	Disagree	Strongly disagree	Strongly disagree	Agree	Strongly disagree	Agree	Disagree	Agree	Agree	Agree	Strongly disagree	Agree	Agree	Unsure/neutral	Disagree	Agree	Agree	Strongly agree	Strongly agree	Strongly agree	Strongly agree	Strongly agree	Agree	Strongly agree	Agree	Strongly agree	Agree	Strongly agree	Strongly agree	Strongly agree	Agree	Unsure/neutral	Agree	Agree	Agree	Agree	Agree	Agree	Strongly disagree	Agree	Strongly agree	Disagree	Strongly agree	Strongly agree	Strongly disagree	Strongly agree
Otago Region	Strongly disagree	Unsure/neutral	Disagree	Unsure/neutral	Unsure/neutral	Agree	Agree	Disagree	Agree	Agree	Unsure/neutral	Agree	Strongly agree	Disagree	Agree	Agree	Disagree	Agree	Strongly agree	Agree	Agree	Disagree	Unsure/neutral	Agree	Agree	Unsure/neutral	Agree	Disagree	Disagree	Agree	Unsure/neutral	Strongly agree	Agree	Unsure/neutral	Strongly agree	Disagree	Agree	Disagree	Disagree	Agree	Agree	Disagree	Agree	Disagree	Agree	Agree	Agree	Disagree	Agree
Canterbury Region	Strongly disagree	Disagree	Strongly disagree	Strongly disagree	Strongly disagree	Disagree	Agree	Disagree	Strongly agree	Disagree	Agree	Strongly agree	Agree	Disagree	Strongly agree	Agree	Unsure/neutral	Disagree	Agree	Strongly agree	Agree	Agree	Agree	Agree	Agree	Agree	Agree	Agree	Agree	Agree	Agree	Agree	Agree	Agree	Agree	Agree	Agree	Agree	Agree	Agree	Agree	Disagree	Agree	Agree	Disagree	Strongly agree	Strongly agree	Strongly disagree	Strongly agree
Canterbury Region	Strongly disagree	Unsure/neutral	Strongly disagree	Disagree	Disagree	Unsure/neutral	Agree	Strongly disagree	Agree	Unsure/neutral	Agree	Unsure/neutral	Agree	Disagree	Agree	Agree	Disagree	Disagree	Agree	Agree	Agree	Agree	Agree	Strongly agree	Agree	Agree	Agree	Agree	Unsure/neutral	Unsure/neutral	Agree	Unsure/neutral	Unsure/neutral	Agree	Disagree	Unsure/neutral	Agree	Agree	Agree	Strongly agree	Strongly agree	Disagree	Unsure/neutral	Agree	Disagree	Agree	Agree	Strongly disagree	Agree
Auckland Region	Strongly disagree	Disagree	Strongly disagree	Disagree	Strongly disagree	Disagree	Agree	Strongly disagree	Agree	Agree	Agree	Strongly agree	Strongly agree	Disagree	Agree	Disagree	Disagree	Unsure/neutral	Strongly agree	Agree	Agree	Agree	Strongly agree	Agree	Agree	Agree	Agree	Agree	Agree	Agree	Agree	Agree	Agree	Agree	Agree	Agree	Agree	Agree	Agree	Agree	Agree	Agree	Agree	Agree	Agree	Agree	Agree	Disagree	Agree
Taranaki Region	Disagree	Unsure/neutral	Strongly disagree	Agree	Strongly disagree	Disagree	Agree	Disagree	Agree	Disagree	Disagree	Agree	Unsure/neutral	Disagree	Disagree	Disagree	Agree	Agree	Agree	Disagree	Disagree	Disagree	Disagree	Disagree	Disagree	Disagree	Disagree	Disagree	Disagree	Agree	Disagree	Agree	Agree	Disagree	Agree	Disagree	Disagree	Disagree	Disagree	Agree	Disagree	Agree	Agree	Unsure/neutral	Agree	Disagree	Unsure/neutral	Disagree	Unsure/neutral
Southland Region	Strongly disagree	Disagree	Strongly disagree	Disagree	Strongly disagree	Disagree	Agree	Strongly disagree	Unsure/neutral	Disagree	Agree	Unsure/neutral	Agree	Strongly disagree	Strongly agree	Agree	Disagree	Disagree	Agree	Strongly agree	Strongly agree	Strongly agree	Strongly agree	Strongly agree	Agree	Agree	Agree	Unsure/neutral	Unsure/neutral	Unsure/neutral	Agree	Agree	Unsure/neutral	Agree	Agree	Unsure/neutral	Agree	Unsure/neutral	Unsure/neutral	Unsure/neutral	Strongly agree	Agree	Agree	Agree	Unsure/neutral	Strongly agree	Strongly agree	Strongly disagree	Strongly agree
Bay of Plenty Region	Disagree	Disagree	Disagree	Disagree	Disagree	Disagree	Agree	Disagree	Agree	Disagree	Agree	Agree	Agree	Disagree	Agree	Agree	Disagree	Disagree	Unsure/neutral	Strongly agree	Strongly agree	Strongly agree	Strongly agree	Strongly agree	Strongly agree	Agree	Strongly agree	Strongly agree	Strongly agree	Strongly agree	Strongly agree	Agree	Strongly agree	Strongly agree	Unsure/neutral	Unsure/neutral	Agree	Agree	Agree	Agree	Agree	Disagree	Agree	Agree	Disagree	Agree	Agree	Disagree	Agree
Waikato Region	Unsure/neutral	Strongly agree	Unsure/neutral	Strongly agree	Disagree	Strongly agree	Disagree	Strongly agree	Unsure/neutral	Strongly agree	Strongly disagree	Strongly disagree	Strongly disagree	Strongly disagree	Strongly disagree	Strongly disagree	Strongly agree	Agree	Strongly agree	Strongly disagree	Disagree	Disagree	Strongly disagree	Strongly disagree	Strongly disagree	Strongly disagree	Strongly disagree	Strongly disagree	Unsure/neutral	Strongly disagree	Strongly disagree	Strongly disagree	Strongly disagree	Strongly disagree	Strongly disagree	Strongly disagree	Strongly disagree	Strongly disagree	Strongly disagree	Strongly disagree	Strongly disagree	Strongly disagree	Strongly disagree	Strongly disagree	Strongly disagree	Strongly disagree	Strongly disagree	Agree	Strongly disagree
Manawatu-Whanganui Region	Strongly disagree	Strongly disagree	Strongly disagree	Strongly disagree	Strongly disagree	Strongly disagree	Strongly agree	Strongly disagree	Disagree	Strongly disagree	Strongly agree	Strongly agree	Agree	Strongly disagree	Strongly agree	Agree	Disagree	Strongly disagree	Disagree	Strongly agree	Strongly agree	Agree	Agree	Strongly agree	Agree	Agree	Agree	Agree	Unsure/neutral	Agree	Strongly agree	Agree	Agree	Strongly agree	Agree	Strongly agree	Agree	Agree	Agree	Agree	Strongly agree	Strongly agree	Agree	Agree	Strongly agree	Strongly agree	Strongly agree	Strongly disagree	Strongly agree
Auckland Region	Strongly disagree	Strongly disagree	Strongly disagree	Unsure/neutral	Strongly disagree	Strongly disagree	Strongly disagree	Strongly disagree	Strongly agree	Disagree	Strongly agree	Unsure/neutral	Unsure/neutral	Strongly disagree	Agree	Agree	Unsure/neutral	Agree	Agree	Strongly agree	Agree	Agree	Agree	Strongly agree	Agree	Unsure/neutral	Agree	Agree	Strongly agree	Agree	Agree	Agree	Agree	Agree	Agree	Unsure/neutral	Agree	Agree	Agree	Strongly agree	Agree	Disagree	Agree	Strongly agree	Strongly disagree	Strongly agree	Strongly agree	Strongly disagree	Strongly agree
Auckland Region	Strongly disagree	Agree	Unsure/neutral	Strongly agree	Strongly disagree	Agree	Agree	Agree	Unsure/neutral	Disagree	Strongly agree	Unsure/neutral	Disagree	Strongly disagree	Agree	Agree	Unsure/neutral	Disagree	Disagree	Agree	Agree	Strongly agree	Agree	Strongly agree	Agree	Strongly agree	Agree	Strongly agree	Strongly agree	Strongly agree	Strongly agree	Strongly agree	Agree	Strongly agree	Strongly agree	Agree	Agree	Unsure/neutral	Unsure/neutral	Agree	Agree	Disagree	Strongly agree	Strongly agree	Disagree	Strongly agree	Agree	Strongly disagree	Agree
Northland Region	Strongly disagree	Disagree	Strongly disagree	Disagree	Disagree	Strongly disagree	Strongly agree	Strongly disagree	Unsure/neutral	Strongly disagree	Strongly agree	Agree	Unsure/neutral	Strongly disagree	Agree	Strongly agree	Strongly disagree	Strongly disagree	Unsure/neutral	Strongly agree	Strongly agree	Strongly agree	Strongly agree	Strongly agree	Strongly agree	Agree	Agree	Agree	Agree	Agree	Strongly agree	Agree	Strongly agree	Agree	Agree	Agree	Agree	Agree	Unsure/neutral	Agree	Strongly agree	Disagree	Strongly agree	Strongly agree	Strongly disagree	Strongly agree	Strongly agree	Strongly disagree	Strongly agree
Auckland Region	Strongly disagree	Disagree	Strongly disagree	Strongly disagree	Strongly disagree	Strongly disagree	Strongly agree	Disagree	Disagree	Disagree	Strongly agree	Agree	Strongly agree	Disagree	Agree	Agree	Disagree	Disagree	Disagree	Strongly agree	Strongly agree	Strongly agree	Strongly agree	Strongly agree	Strongly agree	Agree	Agree	Agree	Unsure/neutral	Agree	Agree	Disagree	Agree	Agree	Disagree	Agree	Agree	Agree	Agree	Agree	Agree	Strongly disagree	Agree	Agree	Strongly disagree	Agree	Strongly agree	Disagree	Agree
Taranaki Region	Unsure/neutral	Agree	Strongly agree	Strongly agree	Unsure/neutral	Unsure/neutral	Disagree	Unsure/neutral	Unsure/neutral	Strongly agree	Strongly disagree	Strongly disagree	Strongly disagree	Strongly disagree	Disagree	Disagree	Strongly agree	Unsure/neutral	Unsure/neutral	Strongly disagree	Disagree	Disagree	Disagree	Disagree	Disagree	Strongly disagree	Strongly disagree	Disagree	Unsure/neutral	Agree	Disagree	Unsure/neutral	Agree	Strongly disagree	Unsure/neutral	Strongly disagree	Strongly disagree	Strongly disagree	Strongly disagree	Strongly agree	Strongly disagree	Strongly disagree	Unsure/neutral	Strongly disagree	Strongly disagree	Strongly disagree	Strongly disagree	Strongly agree	Strongly disagree
Wellington Region	Strongly disagree	Disagree	Strongly disagree	Disagree	Strongly disagree	Strongly disagree	Agree	Strongly disagree	Disagree	Strongly disagree	Strongly agree	Agree	Strongly agree	Strongly disagree	Strongly agree	Strongly agree	Strongly disagree	Strongly disagree	Unsure/neutral	Strongly agree	Strongly agree	Strongly agree	Strongly agree	Strongly agree	Strongly agree	Strongly agree	Strongly agree	Unsure/neutral	Disagree	Agree	Strongly agree	Agree	Disagree	Strongly agree	Strongly agree	Unsure/neutral	Unsure/neutral	Unsure/neutral	Unsure/neutral	Agree	Agree	Disagree	Agree	Agree	Disagree	Strongly agree	Strongly agree	Strongly disagree	Strongly agree
Wellington Region	Strongly disagree	Disagree	Strongly disagree	Agree	Disagree	Agree	Agree	Unsure/neutral	Disagree	Unsure/neutral	Disagree	Agree	Agree	Strongly disagree	Disagree	Strongly disagree	Strongly agree	Strongly agree	Strongly agree	Disagree	Strongly disagree	Strongly disagree	Disagree	Disagree	Disagree	Strongly disagree	Strongly disagree	Disagree	Unsure/neutral	Disagree	Strongly disagree	Disagree	Disagree	Disagree	Disagree	Disagree	Strongly disagree	Disagree	Disagree	Disagree	Disagree	Disagree	Disagree	Disagree	Disagree	Agree	Agree	Disagree	Agree
Northland Region	Strongly disagree	Strongly disagree	Strongly disagree	Strongly disagree	Strongly disagree	Strongly disagree	Strongly agree	Strongly disagree	Unsure/neutral	Strongly disagree	Agree	Agree	Unsure/neutral	Strongly disagree	Agree	Agree	Unsure/neutral	Agree	Agree	Agree	Agree	Agree	Agree	Agree	Agree	Agree	Agree	Unsure/neutral	Disagree	Unsure/neutral	Agree	Unsure/neutral	Unsure/neutral	Unsure/neutral	Agree	Strongly agree	Agree	Strongly agree	Agree	Agree	Strongly agree	Agree	Unsure/neutral	Strongly agree	Agree	Strongly agree	Strongly agree	Strongly disagree	Strongly agree
Waikato Region	Strongly agree	Strongly agree	Strongly agree	Strongly agree	Unsure/neutral	Strongly disagree	Agree	Strongly agree	Strongly disagree	Strongly agree	Strongly disagree	Strongly disagree	Strongly disagree	Strongly disagree	Strongly disagree	Strongly disagree	Strongly agree	Strongly agree	Strongly disagree	Strongly disagree	Strongly disagree	Strongly disagree	Strongly disagree	Strongly disagree	Strongly disagree	Strongly disagree	Strongly disagree	Strongly disagree	Strongly disagree	Strongly disagree	Strongly disagree	Strongly disagree	Agree	Strongly disagree	Strongly disagree	Strongly disagree	Strongly disagree	Strongly disagree	Strongly disagree	Disagree	Strongly disagree	Strongly disagree	Agree	Strongly disagree	Strongly disagree	Strongly disagree	Strongly disagree	Strongly agree	Strongly disagree
Hawke's Bay Region	Strongly disagree	Disagree	Disagree	Disagree	Disagree	Disagree	Agree	Strongly disagree	Unsure/neutral	Unsure/neutral	Unsure/neutral	Unsure/neutral	Agree	Disagree	Unsure/neutral	Unsure/neutral	Agree	Unsure/neutral	Agree	Unsure/neutral	Agree	Unsure/neutral	Unsure/neutral	Agree	Unsure/neutral	Unsure/neutral	Unsure/neutral	Unsure/neutral	Unsure/neutral	Unsure/neutral	Unsure/neutral	Unsure/neutral	Unsure/neutral	Unsure/neutral	Unsure/neutral	Unsure/neutral	Unsure/neutral	Agree	Unsure/neutral	Agree	Unsure/neutral	Unsure/neutral	Unsure/neutral	Agree	Unsure/neutral	Agree	Agree	Disagree	Unsure/neutral
Auckland Region	Disagree	Disagree	Strongly disagree	Agree	Disagree	Strongly agree	Agree	Disagree	Agree	Disagree	Agree	Strongly agree	Agree	Strongly disagree	Strongly agree	Strongly agree	Agree	Agree	Strongly agree	Strongly agree	Strongly agree	Strongly agree	Strongly agree	Strongly agree	Agree	Strongly agree	Strongly agree	Agree	Agree	Strongly agree	Strongly agree	Strongly agree	Strongly agree	Strongly agree	Strongly agree	Strongly agree	Strongly agree	Agree	Agree	Strongly agree	Strongly agree	Agree	Agree	Strongly agree	Strongly agree	Strongly agree	Strongly agree	Strongly disagree	Strongly agree
Auckland Region	Strongly disagree	Strongly disagree	Strongly disagree	Strongly disagree	Strongly disagree	Strongly disagree	Agree	Strongly disagree	Unsure/neutral	Strongly disagree	Agree	Unsure/neutral	Agree	Strongly disagree	Strongly agree	Agree	Strongly disagree	Strongly disagree	Disagree	Strongly agree	Strongly agree	Agree	Strongly agree	Strongly agree	Strongly agree	Agree	Agree	Agree	Agree	Agree	Strongly agree	Disagree	Agree	Agree	Disagree	Agree	Agree	Agree	Agree	Agree	Strongly agree	Strongly disagree	Agree	Strongly agree	Strongly disagree	Strongly agree	Strongly agree	Strongly disagree	Strongly agree
Taranaki Region	Strongly disagree	Disagree	Strongly disagree	Strongly disagree	Strongly disagree	Strongly disagree	Strongly agree	Strongly disagree	Disagree	Disagree	Strongly agree	Strongly agree	Agree	Strongly disagree	Strongly agree	Strongly agree	Strongly disagree	Disagree	Disagree	Strongly agree	Strongly agree	Strongly agree	Strongly agree	Strongly agree	Strongly agree	Agree	Strongly agree	Strongly agree	Unsure/neutral	Strongly agree	Strongly agree	Disagree	Agree	Strongly agree	Disagree	Strongly agree	Unsure/neutral	Strongly agree	Unsure/neutral	Strongly agree	Strongly agree	Strongly disagree	Strongly agree	Strongly agree	Strongly disagree	Strongly agree	Strongly agree	Strongly disagree	Strongly agree
Northland Region	Strongly disagree	Unsure/neutral	Strongly disagree	Disagree	Strongly disagree	Disagree	Strongly agree	Disagree	Agree	Unsure/neutral	Agree	Agree	Agree	Disagree	Agree	Agree	Unsure/neutral	Disagree	Agree	Agree	Agree	Agree	Agree	Agree	Agree	Agree	Agree	Unsure/neutral	Agree	Agree	Agree	Unsure/neutral	Agree	Agree	Unsure/neutral	Agree	Unsure/neutral	Unsure/neutral	Disagree	Agree	Agree	Disagree	Agree	Agree	Disagree	Agree	Agree	Disagree	Agree
Canterbury Region	Strongly disagree	Disagree	Strongly disagree	Disagree	Disagree	Strongly disagree	Agree	Disagree	Disagree	Strongly disagree	Agree	Agree	Strongly agree	Disagree	Agree	Agree	Disagree	Disagree	Disagree	Agree	Agree	Agree	Agree	Agree	Agree	Agree	Agree	Agree	Unsure/neutral	Agree	Agree	Agree	Agree	Agree	Agree	Agree	Unsure/neutral	Unsure/neutral	Disagree	Agree	Agree	Unsure/neutral	Agree	Agree	Agree	Agree	Agree	Disagree	Agree
Taranaki Region	Strongly disagree	Disagree	Strongly disagree	Unsure/neutral	Strongly disagree	Disagree	Strongly agree	Strongly disagree	Disagree	Unsure/neutral	Disagree	Disagree	Agree	Strongly disagree	Unsure/neutral	Disagree	Unsure/neutral	Disagree	Agree	Agree	Unsure/neutral	Agree	Agree	Agree	Agree	Disagree	Disagree	Strongly disagree	Unsure/neutral	Agree	Unsure/neutral	Agree	Agree	Disagree	Agree	Disagree	Disagree	Strongly disagree	Disagree	Agree	Agree	Disagree	Agree	Unsure/neutral	Disagree	Agree	Agree	Strongly disagree	Agree
Waikato Region	Strongly disagree	Disagree	Strongly disagree	Agree	Strongly disagree	Disagree	Agree	Strongly disagree	Disagree	Disagree	Agree	Agree	Agree	Strongly disagree	Agree	Agree	Disagree	Unsure/neutral	Agree	Strongly agree	Agree	Agree	Agree	Strongly agree	Agree	Agree	Agree	Agree	Unsure/neutral	Agree	Agree	Strongly agree	Agree	Agree	Strongly agree	Unsure/neutral	Unsure/neutral	Agree	Unsure/neutral	Unsure/neutral	Strongly agree	Strongly disagree	Agree	Agree	Disagree	Strongly agree	Strongly agree	Strongly disagree	Strongly agree
Waikato Region	Strongly disagree	Strongly disagree	Strongly disagree	Strongly disagree	Strongly disagree	Strongly disagree	Strongly agree	Strongly disagree	Agree	Strongly disagree	Agree	Agree	Agree	Strongly disagree	Strongly agree	Strongly agree	Strongly disagree	Strongly disagree	Strongly disagree	Strongly agree	Strongly agree	Strongly agree	Strongly agree	Strongly agree	Strongly agree	Strongly agree	Strongly agree	Strongly agree	Strongly agree	Agree	Strongly agree	Strongly agree	Agree	Strongly agree	Strongly agree	Strongly agree	Agree	Strongly agree	Strongly agree	Strongly agree	Strongly agree	Strongly agree	Strongly agree	Strongly agree	Strongly disagree	Strongly agree	Strongly agree	Strongly disagree	Strongly agree
Waikato Region	Strongly disagree	Strongly disagree	Strongly disagree	Strongly disagree	Strongly disagree	Strongly disagree	Agree	Strongly disagree	Strongly disagree	Strongly disagree	Agree	Disagree	Agree	Strongly disagree	Strongly agree	Strongly agree	Strongly disagree	Strongly disagree	Agree	Strongly agree	Strongly agree	Agree	Agree	Strongly agree	Agree	Unsure/neutral	Strongly disagree	Agree	Agree	Unsure/neutral	Agree	Agree	Unsure/neutral	Agree	Agree	Agree	Agree	Agree	Agree	Agree	Strongly agree	Disagree	Agree	Agree	Disagree	Strongly agree	Agree	Strongly disagree	Strongly agree
Hawke's Bay Region	Strongly disagree	Disagree	Strongly disagree	Disagree	Disagree	Strongly disagree	Agree	Strongly disagree	Disagree	Disagree	Agree	Agree	Strongly agree	Disagree	Disagree	Unsure/neutral	Unsure/neutral	Unsure/neutral	Strongly agree	Unsure/neutral	Agree	Agree	Strongly agree	Agree	Agree	Disagree	Unsure/neutral	Disagree	Agree	Agree	Disagree	Strongly agree	Agree	Disagree	Strongly agree	Strongly disagree	Disagree	Disagree	Strongly disagree	Agree	Disagree	Disagree	Agree	Agree	Agree	Unsure/neutral	Agree	Strongly disagree	Agree
Canterbury Region	Strongly disagree	Disagree	Strongly disagree	Strongly agree	Strongly disagree	Strongly agree	Strongly agree	Disagree	Disagree	Disagree	Strongly disagree	Disagree	Disagree	Strongly disagree	Disagree	Disagree	Strongly agree	Strongly agree	Strongly agree	Agree	Disagree	Strongly disagree	Unsure/neutral	Unsure/neutral	Disagree	Disagree	Disagree	Strongly disagree	Strongly agree	Strongly agree	Disagree	Disagree	Strongly agree	Disagree	Disagree	Strongly disagree	Strongly disagree	Strongly disagree	Strongly disagree	Strongly agree	Disagree	Disagree	Strongly agree	Unsure/neutral	Disagree	Disagree	Unsure/neutral	Unsure/neutral	Agree
Canterbury Region	Strongly disagree	Strongly disagree	Strongly disagree	Disagree	Strongly disagree	Strongly disagree	Strongly agree	Strongly disagree	Agree	Strongly disagree	Disagree	Unsure/neutral	Unsure/neutral	Strongly disagree	Strongly agree	Strongly agree	Strongly disagree	Unsure/neutral	Disagree	Strongly agree	Strongly agree	Strongly agree	Strongly agree	Strongly agree	Strongly agree	Strongly agree	Agree	Strongly agree	Disagree	Unsure/neutral	Strongly agree	Disagree	Unsure/neutral	Strongly agree	Strongly disagree	Strongly agree	Unsure/neutral	Strongly agree	Disagree	Unsure/neutral	Strongly agree	Disagree	Unsure/neutral	Strongly agree	Disagree	Strongly agree	Strongly agree	Strongly disagree	Strongly agree
Auckland Region	Disagree	Unsure/neutral	Disagree	Unsure/neutral	Disagree	Agree	Unsure/neutral	Disagree	Disagree	Agree	Agree	Agree	Agree	Disagree	Agree	Agree	Unsure/neutral	Disagree	Disagree	Agree	Agree	Agree	Agree	Agree	Agree	Unsure/neutral	Agree	Unsure/neutral	Unsure/neutral	Unsure/neutral	Agree	Agree	Unsure/neutral	Agree	Agree	Unsure/neutral	Unsure/neutral	Agree	Disagree	Unsure/neutral	Agree	Unsure/neutral	Unsure/neutral	Agree	Unsure/neutral	Agree	Agree	Disagree	Agree
Auckland Region	Unsure/neutral	Unsure/neutral	Unsure/neutral	Unsure/neutral	Unsure/neutral	Agree	Strongly agree	Unsure/neutral	Unsure/neutral	Unsure/neutral	Unsure/neutral	Unsure/neutral	Unsure/neutral	Strongly disagree	Agree	Unsure/neutral	Agree	Agree	Disagree	Strongly agree	Agree	Strongly agree	Agree	Strongly agree	Agree	Agree	Agree	Unsure/neutral	Agree	Unsure/neutral	Agree	Agree	Unsure/neutral	Agree	Disagree	Agree	Unsure/neutral	Unsure/neutral	Disagree	Unsure/neutral	Agree	Agree	Unsure/neutral	Agree	Agree	Unsure/neutral	Unsure/neutral	Disagree	Unsure/neutral
Auckland Region	Strongly disagree	Disagree	Strongly disagree	Strongly disagree	Strongly disagree	Strongly disagree	Strongly agree	Strongly disagree	Agree	Strongly disagree	Agree	Agree	Strongly agree	Strongly disagree	Agree	Agree	Unsure/neutral	Disagree	Strongly agree	Agree	Agree	Strongly agree	Agree	Agree	Agree	Disagree	Unsure/neutral	Agree	Strongly agree	Strongly disagree	Agree	Disagree	Agree	Agree	Strongly disagree	Strongly disagree	Unsure/neutral	Unsure/neutral	Unsure/neutral	Unsure/neutral	Strongly agree	Strongly disagree	Agree	Agree	Strongly disagree	Strongly agree	Strongly agree	Strongly disagree	Strongly agree
Wellington Region	Strongly disagree	Disagree	Strongly disagree	Disagree	Disagree	Disagree	Unsure/neutral	Disagree	Strongly agree	Disagree	Agree	Agree	Strongly agree	Strongly disagree	Strongly agree	Strongly agree	Agree	Unsure/neutral	Strongly agree	Strongly agree	Strongly agree	Agree	Agree	Agree	Strongly agree	Agree	Unsure/neutral	Agree	Agree	Agree	Agree	Agree	Agree	Agree	Unsure/neutral	Strongly agree	Agree	Strongly agree	Unsure/neutral	Agree	Strongly agree	Disagree	Agree	Strongly agree	Disagree	Strongly agree	Strongly agree	Strongly disagree	Strongly agree
Wellington Region	Strongly disagree	Strongly disagree	Strongly disagree	Disagree	Strongly disagree	Strongly disagree	Agree	Strongly disagree	Unsure/neutral	Strongly disagree	Strongly agree	Agree	Agree	Disagree	Strongly agree	Agree	Disagree	Disagree	Agree	Strongly agree	Agree	Agree	Agree	Agree	Agree	Agree	Agree	Unsure/neutral	Agree	Agree	Agree	Agree	Agree	Agree	Agree	Unsure/neutral	Strongly agree	Agree	Agree	Agree	Agree	Disagree	Agree	Agree	Disagree	Strongly agree	Strongly agree	Strongly disagree	Agree
Waikato Region	Strongly disagree	Unsure/neutral	Unsure/neutral	Agree	Unsure/neutral	Agree	Strongly agree	Agree	Disagree	Agree	Unsure/neutral	Agree	Agree	Strongly disagree	Agree	Unsure/neutral	Unsure/neutral	Unsure/neutral	Strongly agree	Agree	Unsure/neutral	Disagree	Disagree	Unsure/neutral	Unsure/neutral	Unsure/neutral	Disagree	Agree	Strongly agree	Disagree	Unsure/neutral	Unsure/neutral	Disagree	Agree	Agree	Unsure/neutral	Disagree	Disagree	Unsure/neutral	Disagree	Unsure/neutral	Unsure/neutral	Disagree	Unsure/neutral	Agree	Unsure/neutral	Unsure/neutral	Unsure/neutral	Unsure/neutral
Manawatu-Whanganui Region	Strongly disagree	Strongly disagree	Strongly disagree	Disagree	Strongly disagree	Strongly disagree	Strongly agree	Strongly disagree	Unsure/neutral	Strongly disagree	Strongly agree	Disagree	Disagree	Strongly disagree	Agree	Agree	Strongly disagree	Disagree	Disagree	Agree	Strongly agree	Strongly agree	Strongly agree	Agree	Strongly agree	Disagree	Agree	Agree	Agree	Unsure/neutral	Strongly agree	Agree	Disagree	Strongly agree	Agree	Strongly disagree	Disagree	Disagree	Agree	Disagree	Strongly agree	Strongly disagree	Agree	Strongly agree	Strongly disagree	Strongly agree	Strongly agree	Strongly disagree	Strongly agree
Auckland Region	Strongly disagree	Disagree	Strongly disagree	Disagree	Strongly disagree	Strongly disagree	Strongly agree	Disagree	Agree	Strongly disagree	Strongly agree	Strongly agree	Agree	Disagree	Strongly agree	Strongly agree	Strongly disagree	Strongly disagree	Strongly disagree	Strongly agree	Strongly agree	Strongly agree	Strongly agree	Strongly agree	Strongly agree	Strongly agree	Strongly agree	Strongly agree	Disagree	Strongly agree	Strongly agree	Strongly agree	Strongly agree	Strongly agree	Agree	Agree	Strongly agree	Strongly agree	Strongly agree	Strongly agree	Strongly agree	Disagree	Strongly agree	Strongly agree	Disagree	Strongly agree	Strongly agree	Strongly disagree	Strongly agree
Bay of Plenty Region	Strongly disagree	Strongly disagree	Strongly disagree	Disagree	Strongly disagree	Strongly disagree	Agree	Strongly disagree	Disagree	Strongly disagree	Agree	Agree	Agree	Strongly disagree	Strongly agree	Agree	Strongly disagree	Disagree	Agree	Agree	Strongly agree	Agree	Strongly agree	Strongly agree	Strongly agree	Unsure/neutral	Agree	Unsure/neutral	Disagree	Unsure/neutral	Agree	Strongly agree	Unsure/neutral	Agree	Strongly agree	Unsure/neutral	Disagree	Unsure/neutral	Disagree	Disagree	Agree	Disagree	Disagree	Unsure/neutral	Disagree	Agree	Agree	Strongly disagree	Agree
Canterbury Region	Strongly disagree	Disagree	Strongly disagree	Strongly disagree	Disagree	Disagree	Strongly agree	Disagree	Agree	Strongly disagree	Strongly agree	Agree	Strongly agree	Disagree	Strongly agree	Strongly agree	Strongly disagree	Strongly disagree	Agree	Strongly agree	Strongly agree	Disagree	Agree	Strongly agree	Agree	Agree	Strongly agree	Agree	Agree	Agree	Agree	Agree	Agree	Agree	Agree	Agree	Agree	Agree	Agree	Agree	Agree	Disagree	Agree	Agree	Disagree	Strongly agree	Strongly agree	Strongly disagree	Agree
Tasman/ Nelson Region	Strongly disagree	Disagree	Strongly disagree	Unsure/neutral	Disagree	Strongly disagree	Strongly agree	Strongly disagree	Agree	Disagree	Unsure/neutral	Agree	Agree	Strongly disagree	Strongly agree	Strongly agree	Disagree	Unsure/neutral	Agree	Strongly agree	Strongly agree	Strongly agree	Strongly agree	Strongly agree	Strongly agree	Disagree	Agree	Agree	Unsure/neutral	Unsure/neutral	Agree	Strongly agree	Strongly agree	Strongly agree	Agree	Unsure/neutral	Unsure/neutral	Unsure/neutral	Unsure/neutral	Unsure/neutral	Agree	Disagree	Strongly agree	Agree	Disagree	Strongly agree	Strongly agree	Strongly disagree	Strongly agree
Waikato Region	Disagree	Disagree	Unsure/neutral	Unsure/neutral	Unsure/neutral	Disagree	Agree	Disagree	Unsure/neutral	Unsure/neutral	Agree	Agree	Agree	Disagree	Agree	Agree	Unsure/neutral	Unsure/neutral	Unsure/neutral	Agree	Agree	Agree	Agree	Agree	Agree	Unsure/neutral	Agree	Agree	Agree	Agree	Agree	Agree	Agree	Agree	Agree	Agree	Unsure/neutral	Agree	Agree	Agree	Agree	Unsure/neutral	Agree	Agree	Unsure/neutral	Agree	Agree	Disagree	Agree
Manawatu-Whanganui Region	Disagree	Disagree	Disagree	Disagree	Disagree	Disagree	Disagree	Disagree	Disagree	Disagree	Agree	Agree	Agree	Disagree	Agree	Agree	Disagree	Agree	Agree	Agree	Agree	Agree	Agree	Agree	Agree	Agree	Agree	Agree	Agree	Agree	Agree	Agree	Agree	Agree	Agree	Agree	Agree	Agree	Disagree	Agree	Strongly agree	Agree	Agree	Agree	Agree	Agree	Agree	Agree	Agree
Wellington Region	Strongly disagree	Disagree	Strongly disagree	Strongly disagree	Strongly agree	Strongly disagree	Strongly agree	Strongly disagree	Unsure/neutral	Strongly disagree	Agree	Agree	Agree	Strongly disagree	Strongly agree	Agree	Disagree	Strongly disagree	Agree	Strongly agree	Strongly agree	Strongly agree	Agree	Strongly agree	Agree	Unsure/neutral	Unsure/neutral	Unsure/neutral	Disagree	Unsure/neutral	Agree	Agree	Agree	Agree	Strongly agree	Unsure/neutral	Disagree	Agree	Agree	Strongly agree	Unsure/neutral	Disagree	Agree	Agree	Disagree	Agree	Agree	Strongly disagree	Agree
Auckland Region	Disagree	Disagree	Strongly disagree	Disagree	Disagree	Disagree	Agree	Disagree	Agree	Disagree	Agree	Strongly agree	Strongly agree	Disagree	Strongly disagree	Strongly agree	Disagree	Disagree	Strongly disagree	Strongly disagree	Strongly agree	Strongly agree	Strongly agree	Strongly agree	Strongly agree	Strongly agree	Strongly agree	Strongly agree	Strongly agree	Strongly agree	Strongly agree	Agree	Agree	Strongly agree	Strongly agree	Strongly agree	Agree	Strongly agree	Strongly agree	Strongly agree	Strongly agree	Strongly disagree	Agree	Strongly agree	Strongly disagree	Strongly agree	Strongly agree	Strongly disagree	Strongly agree
Taranaki Region	Strongly disagree	Disagree	Strongly disagree	Disagree	Disagree	Disagree	Agree	Disagree	Disagree	Strongly disagree	Agree	Strongly agree	Strongly agree	Disagree	Agree	Disagree	Agree	Agree	Strongly agree	Unsure/neutral	Disagree	Agree	Agree	Agree	Unsure/neutral	Agree	Disagree	Disagree	Unsure/neutral	Unsure/neutral	Unsure/neutral	Disagree	Unsure/neutral	Unsure/neutral	Disagree	Strongly agree	Unsure/neutral	Strongly agree	Disagree	Unsure/neutral	Strongly agree	Strongly disagree	Agree	Strongly agree	Strongly disagree	Strongly agree	Strongly agree	Strongly disagree	Strongly agree
Auckland Region	Strongly disagree	Disagree	Strongly disagree	Disagree	Strongly disagree	Strongly disagree	Strongly disagree	Strongly disagree	Strongly agree	Strongly disagree	Strongly agree	Agree	Agree	Strongly disagree	Agree	Agree	Disagree	Disagree	Disagree	Strongly agree	Strongly agree	Strongly agree	Strongly agree	Strongly agree	Agree	Unsure/neutral	Agree	Agree	Agree	Unsure/neutral	Agree	Agree	Agree	Agree	Agree	Unsure/neutral	Agree	Agree	Agree	Agree	Agree	Disagree	Unsure/neutral	Unsure/neutral	Agree	Agree	Agree	Disagree	Agree
Waikato Region	Disagree	Disagree	Disagree	Agree	Unsure/neutral	Disagree	Unsure/neutral	Disagree	Unsure/neutral	Agree	Unsure/neutral	Disagree	Disagree	Disagree	Disagree	Agree	Unsure/neutral	Agree	Agree	Unsure/neutral	Disagree	Unsure/neutral	Unsure/neutral	Unsure/neutral	Unsure/neutral	Disagree	Unsure/neutral	Disagree	Unsure/neutral	Unsure/neutral	Unsure/neutral	Unsure/neutral	Disagree	Disagree	Unsure/neutral	Unsure/neutral	Unsure/neutral	Unsure/neutral	Agree	Agree	Unsure/neutral	Unsure/neutral	Unsure/neutral	Unsure/neutral	Unsure/neutral	Unsure/neutral	Agree	Unsure/neutral	Unsure/neutral
[truncated: 321 more rows]
[truncated: 31 more columns]
